# Supplementary material for: Adolescent neurostimulation of dopamine circuit reverses genetic deficits in frontal cortex function
Source: eLife. 2023 Oct 13;12:RP87414. doi: 10.7554/eLife.87414 (PMC10575630; doi:10.7554/eLife.87414)
Supplement: Figure 1—source data 1. [file elife-87414-fig1-data1.xlsx]

## Sheet: Sheet1
Figure 1b			Figure 1c			Figure 1f			Figure 1g			Figure 1 – figure supplement 1b			Figure 1 – figure supplement 1c			Figure 1 – figure supplement 1d
WT	Arc-/-		WT	Arc-/-		WT	Arc-/-		WT	Arc-/-		Ctrl	Gi		Ctrl	Gi		Ctrl	Gi
57.1429	61.1111		35	36		62.9901	54.9326		92.2279	101.511		70.5882	46.6667		17	15		55.5556	57.1429
60.7143	50		28	24		64.7595	89.5701		104.526	82.9614		63.1579	48.718		19	39		45	61.9048
74.0741	52		27	25		236.962	72.788		78.1626	84.2208		66.6667	47.8261		42	46		30.2326	39.5349
60.7143	50		28	28		44.0546	137		117.565	68.9968		57.8947	60		19	20		45	37.5
76.3158	59.2593		38	27		91.328	50.3852		106.222	76.4256		66.6667	66.6667		15	27		43.75	40
64.1026	54		39	50		66.9979	89.2173		95.5923	76.7135		62.8571	54.7619		35	42		52.7778	36.1702
75	63.6364		36	55		132.908	112.833		105.705	98.8622
69.2308	48.2759		39	29
	42.5			40
P value	0.0012		P value	0.7979		P value	0.6405		P value	0.0339		P value	0.0174		P value	0.3337		P value	0.9986
t	3.975		t	0.261		t	0.479		t	2.393		t	2.845		t	1.016		t	0.002
df	15		df	15		df	12		df	12		df	10		df	10		df	10
