# Supplementary material for: Adolescent neurostimulation of dopamine circuit reverses genetic deficits in frontal cortex function
Source: eLife. 2023 Oct 13;12:RP87414. doi: 10.7554/eLife.87414 (PMC10575630; doi:10.7554/eLife.87414)
Supplement: Figure 2—source data 1. [file elife-87414-fig2-data1.xlsx]

## Sheet: Sheet1
Figure 2 – figure supplement 1d			Figure 2 – figure supplement 1e			Figure 2 – figure supplement 1f			Figure 2 – figure supplement 1g			Figure 2 – figure supplement 1h			Figure 2 – figure supplement 1i
WT	Arc-/-		WT	Arc-/-		WT	Arc-/-		WT	Arc-/-		WT	Arc-/-		WT	Arc-/-
0.032173	0.042088		2.05364	3.79992		0.536854	0.441128		50	69.23		12	13		50	69.23
0.059193	0.034107		1.43275	4.85287		0.510326	0.414231		73.91	56.25		23	16		73.91	56.25
0.043572	0.061623		3.60403	3.99193		0.440902	0.483592		76	64		25	25		76	64
0.05666	0.073438		5.54312	2.4392		0.406298	0.464445		53.33	60		15	25		53.33	60
0.033991	0.057451		3.53068	4.58202		0.469547	0.454235		85.71	43.48		21	23		85.71	43.48
0.08778	0.070291		2.54136	4.0783		0.673998	0.526294		76.92	40.91		13	22		76.92	40.91
0.052755	0.060173		2.13226	4.69117		0.478418	0.404191		66.67	47.37		21	19		66.67	47.37
0.048923			3.90578			0.45059			60			25			60
P value	0.5481		P value	0.1171		P value	0.2638		P value	0.0468		P value	0.6899		P value	0.304
t	0.617		t	1.679		t	1.168		t	2.196		t	0.408		t	1.07
df	13		df	13		df	13		df	13		df	13		df	13
Figure 2c
WT																			Arc-/-
1	0.54044	0	0	0.701521	0	0	0	0	0	0	0	0	0	0	0	0.0314939	0.638677		1	0	0.0575126	0.0257064	0	0.0293423	0.669155	0.119492	0.00606419	0.056412	0.415093	0.62213	0	0	0	0	0.0229365	0.915505
1	0	0	0	0	0	0	0	0	0	0	0	0	0	0	0	0	0		1	0.00730009	0	0	0	0.0431685	0.339228	0.707407	0.485317	0.193282	0	0.193122	0.724092	0	0	0	0	0.146662
1	0	0	0	0	0	0	0	0.0884676	0	0	0	0	0	0	0	0	0.181314		1	0.105381	0.248011	0	0.64858	0.0376352	0	0.0732121	0.0491983	0.176245	0	0	0	0	0	0	0	0.0733645
1	0.475149	0	0	0	0	0	0	0	0	0	0	0	0	0	0	0	0.237239		1	0.234369	0.424155	0.208445	0.937977	0.385619	0	0.0494597	0.420923	0.334024	0.481585	0.276902	0.186144	0.144299	0	0.903674	0.754192	0.0173823
1	0	0	0	0	0	0	0	0	0.452511	0	0	0	0	0	0	0.128052	0.6323		1	0	0	0	0	0	0	0	0	0	0	0	0	0	0	0	0	0.143296
1	0.315119	0.375483	0	0.267802	0.0772734	0	0	0	0	0.0852887	0.400632	0	0	0.052131	0.742397	0.214358	0.541752		1	0.0714344	0	0.0251963	0.0137808	0	0	0	0.140084	0.31085	0.301732	0.0780723	0.160473	0.0879763	0.0784943	0	0	0.0475583
1	0	0	0	0	0	0	0	0	0	0	0	0	0	0	0	0	0		1	0.452697	0.014337	0.325744	0.0486762	0.0175739	0.124326	0.298165	0.382683	0.128775	0.398379	0	0.232012	0.168511	0.135744	0.029379	0.207959	0.733155
1	0	0	0	0	0	0	0	0.830872	0.354199	0	0	0	0	0	0	0	0.580019		1	0.157028	0	0.182695	0.285683	0.223212	0	0	0	0	0	0	0.18724	0.189267	0.0483757	0.0259644	0.0448545	0.282343
1	0	0	0	0	0	0	0	0	0	0	0	0	0	0	0	0	0.116932		1	0	0.0820758	0	0	0	0.162078	0	0	0	0	0	0	0	0	0	0	0.470678
1	0.260231	0	0	0	0.637331	0.637331	0	0.124468	0	0	0	0	0	0	0	0	0.370156		1	0.229201	0	0	0	0	0	0	0.309865	0.76272	0.255935	0	0	0	0.638167	0.124088	0.583851	0.502938
1	0.944532	0	0	0.654045	0	0	0	0.355086	0	0	0	0	0	0	0	0.0913814	0.705787		1	0.129421	0	0	0	0	0.0588172	0	0.120347	0.0788897	0.0270186	0	0.246857	0.0114282	0	0.0457509	0	0.97894
1	0	0	0	0	0	0	0	0	0	0	0	0	0	0	0	0	0.0820188		1	0.19779	0	0.026176	0	0	0	0.14455	0.328775	0.970924	0.197515	0	0	0.0238115	0.352496	0.0696119	0.136018	0.917903
1	0	0	0	0	0	0	0	0	0	0	0	0	0	0	0	0	0		1	0.160401	0	0	0.271229	0	0	0	0.349867	0.928376	0.626482	0.367846	0.264748	0.0442251	0.455705	0.199037	0.0457497	0.968345
1	0	0	0	0.210124	0	0	0	0	0	0	0	0	0	0	0	0	0.414475		1	0.276821	0.240274	0.682477	0.261658	0	0	0	0.0815555	0.196659	0.32576	0.13263	0.472397	0.217097	0.564417	0.108109	0.348016	0.346836
1	0.929149	0	0	0	0	0	0	0	0	0	0	0	0	0	0	0	0.0586091		1	0.12875	0.00670824	0	0	0.0552452	0.215758	0	0.188473	0.304738	0.327635	0.137582	0.0300179	0	0.00808792	0.450092	0.9257	0.295308
1	0	0	0	0	0	0	0	0	0	0	0	0	0	0	0	0	0		1	0.0191082	0.00425936	0	0	0	0	0	0.396063	0.395461	0	0	0	0	0	0	0	0.17816
1	0	0	0	0	0	0	0	0.836507	0	0	0	0	0	0	0	0	0		1	0.20146	0.0245841	0.0639819	0.262457	0	0	0.050986	0.0978886	0.263485	0.0759899	0.475763	0.80976	0.196164	0.394091	0	0.951732	0.875893
1	0	0	0	0	0	0	0	0	0	0	0	0	0	0	0	0	0		1	0.88741	0.23052	0	0.320492	0	0.130494	0.170165	0.099536	0.722427	0.548835	0.245178	0	0.0409336	0.507446	0.287156	0.113906	0.35328
1	0	0	0	0	0	0	0	0	0	0	0	0	0	0	0	0	0		1	0.0883772	0.176815	0.0481118	0	0.116109	0.190845	0.0878411	0.159403	0.188844	0.196329	0.150661	0.047531	0.00583504	0.264238	0.418518	0.197455	0.623889
1	0.190771	0.00786374	0.307219	0.605829	0.391057	0.180115	0	0	0.263484	0.330783	0.445531	0.34569	0.399211	0.13307	0	0	0.0294991		1	0.0292084	0.299416	0.480161	0	0.651147	0.126797	0	0.110226	0.706544	0.170655	0	0.166572	0.128089	0.218124	0	0	0.623233
1	0.257624	0	0.233496	0.0731333	0	0	0	0.0280898	0	0	0	0	0	0	0	0.397208	0.154961		1	0.0720806	0.311712	0.0790055	0.28331	0	0	0	0	0.240697	0.387201	0.335089	0.288159	0.0219056	0	0	0	0.0726087
1	0.717791	0.172344	0.121087	0.0293934	0	0.0232843	0	0.100748	0.0467344	0.0886142	0.0352117	0.126886	0.432707	0.017025	0.0499683	0	0.0471799		1	0.525284	0.175324	0.237808	0.353923	0.0183503	0.345238	0.191684	0.50489	0.330252	0.127519	0.588012	0.196206	0.147532	0.105808	0.0516918	0.443752	0.378292
1	0	0	0	0	0	0	0	0.161656	0	0	0	0	0	0	0	0	0.248284		1	0.746038	0.183701	0.133578	0.0714021	0.00671833	0.334204	0.299085	0.139388	0.209243	0.304886	0.560722	0.376777	0.0595388	0.137119	0.0831142	0.40181	0.248778
1	0	0	0.774938	0	0	0	0	0.15139	0.984033	0	0	0	0	0	0	0	0		1	0	0	0	0	0.759921	0	0	0	0.0555019	0	0	0	0.311989	0	0	0	0.572649
1	0.368664	0.324904	0.475186	0.0420871	0.337529	0.856557	0.955182	0.565215	0.206597	0.316656	0.0465956	0.243144	0.288294	0.00763686	0.0944824	0.484647	0.221971		1	0.192303	0	0	0	0	0	0	0	0	0	0	0	0	0	0	0	0
1	0.100611	0.500137	0.0361094	0	0	0	0.584865	0.635227	0.555455	0	0	0.29395	0	0	0.0631919	0.407016	0.434491		1	0	0	0	0	0	0	0	0.117214	0.365745	0.570148	0.654836	0.240106	0.181722	0.500124	0.243811	0	0
1	0.952444	0.512114	0.551432	0.0960845	0.319753	0	0	0.588189	0.0647988	0	0.178651	0.779434	0.968324	0.638351	0.175668	0	0.0480896		1	0.355804	0.597192	0	0.413584	0.167831	0	0	0.057565	0.843956	0	0	0	0	0	0.121246	0	0.556229
1	0	0	0.65493	0.565936	0.876228	0.768647	0.197352	0.103506	0	0	0	0	0	0	0	0	0.0740983		1	0.0708523	0.667716	0.598633	0	0	0.6942	0.73595	0.722649	0.31163	0.343164	0.484766	0	0	0	0.208984	0.136957	0.419829
1	0.238136	0.135019	0.367228	0.244819	0.13682	0.0549998	0.249077	0.74517	0.988144	0.39335	0.0125932	0.0881522	0.20172	0.182931	0.335689	0.303484	0.177727		1	0.351667	0.200385	0	0.484805	0.0538672	0.0835348	0.0896607	0.0430282	0.609696	0.196516	0.144142	0	0	0	0	0.061059	0.82756
1	0.55333	0.516807	0.667376	0	0.109143	0.0349215	0.437016	0.134466	0.404683	0.459326	0.202612	0	0	0	0.280303	0.109959	0.206084		1	0.754044	0.24849	0	0.521766	0.626119	0.598896	0.550985	0.268077	0.551452	0.150192	0	0	0	0	0.340221	0	0.601261
1	0	0	0	0	0	0	0	0	0	0	0	0	0	0	0	0	0.699761		1	0.378937	0.239443	0.0364163	0.436472	0.0505867	0.215515	0.362154	0.192629	0.65307	0.273729	0.232126	0	0	0	0	0.0602185	0.912297
1	0	0	0	0.220413	0	0	0.331052	0	0.226078	0	0	0	0	0.0154343	0	0.0704393	0.218272		1	0.219813	0	0	0	0.113688	0.025264	0	0.475249	0.922757	0	0	0	0	0	0	0.176926	0.486219
1	0	0	0	0	0	0	0	0	0	0	0	0	0	0	0	0	0.281522		1	0.594852	0.19293	0	0	0.0929358	0.0413048	0	0.0213612	0.456377	0.27263	0.0454384	0	0	0	0.0673232	0.117692	0.19379
1	0.439275	0	0	0.238646	0	0	0	0	0	0.843653	0.436714	0	0	0.259865	0	0.0451912	0.146209		1	0.176632	0	0	0	0	0	0	0.257417	0.257668	0	0	0	0	0	0.509555	0	0.758516
1	0.583933	0.49343	0.161817	0	0	0	0	0	0	0	0	0	0	0.0437961	0	0.0477013	0.410877		1	0.197506	0.0522972	0.023356	0.13133	0.0691212	0.104534	0.0367785	0.252928	0.380882	0.0538566	0	0.154525	0.0180658	0.369483	0	0	0.0543803
1	0	0	0	0	0	0	0	0	0	0	0	0	0	0	0	0.103117	0.0275449		1	0.00930643	0	0.0312108	0.502273	0.263791	0.0856024	0.163194	0.256081	0.590766	0.217176	0	0.199045	0.435914	0.266194	0.109096	0	0.0392005
1	0	0	0	0	0	0	0	0	0	0	0	0	0	0	0	0	0.790683		1	0.394965	0.272868	0.275972	0.0649685	0	0.00592188	0	0.508601	0.798621	0.736882	0.385264	0.378393	0.23817	0.069667	0.392511	0.382412	0.573731
1	0.170256	0	0.0567854	0.179121	0.357224	0.16422	0	0	0.719534	0	0	0	0.00922772	0.219289	0.271628	0.652069	0.0857849		1	0	0.0121131	0.305991	0.142959	0	0.0095746	0.0990331	0.00795968	0.141275	0	0	0	0	0	0.0655678	0.518011	0.499744
1	0.467346	0	0	0	0	0	0	0	0	0	0	0	0	0	0	0	0.115911		1	0.0406445	0.172739	0.121839	0	0	0.270929	0.0404742	0.965284	0.945932	0.00993401	0	0.0230937	0	0.0837131	0.0535656	0	0
1	0.185638	0.047062	0.218338	0.985449	0.103192	0.42257	0	0	0	0.0144405	0	0	0	0.0442041	0.0661859	0.498042	0.899701		1	0.950548	0.898225	0.813685	0.610015	0.373499	0.186742	0.0827945	0.553573	0.162944	0.263592	0.344757	0.116759	0.0153244	0.0644855	0.0343167	0.00869142	0.0116568
1	0.613297	0.146991	0.49579	0.271281	0	0.126991	0.02669	0.0177117	0	0	0	0	0	0.1248	0	0	0.642525		1	0.161183	0.15216	0.0661132	0.308481	0.0195348	0.164296	0.286117	0.201834	0.578186	0.361272	0.546557	0.136904	0.186441	0.0690852	0.263132	0.251431	0.585844
1	0.129813	0.203394	0	0	0	0	0.676468	0.651287	0.859475	0	0	0	0.990459	0	0	0	0.0456224		1	0.463312	0	0	0	0.297196	0.740191	0.861338	0.253746	0.0128201	0.155329	0	0.698666	0.538975	0.472839	0.0966634	0.430718	0.215058
1	0.373356	0.405001	0.637437	0.765665	0.803569	0.282423	0	0	0	0	0	0	0	0	0	0.0669035	0		1	0.0140471	0.356487	0.0113716	0	0	0.0598032	0.376679	0.169838	0.2324	0.0668629	0.122713	0.0618707	0.386692	0.155498	0.752805	0.0392863	0.0340739
1	0.777786	0	0	0	0	0	0	0	0	0	0	0	0	0	0	0	0.858308		1	0.529137	0.590193	0.539689	0.316064	0.113809	0.264757	0.294797	0.500285	0.389694	0.180509	0.0135237	0.0957137	0.081184	0.0182421	0.146261	0.208908	0.364683
1	0.628522	0.0020209	0.033605	0	0.0492392	0.0497765	0	0.393834	0.111186	0	0	0	0	0	0.0616485	0	0.0520002		1	0.545703	0.118414	0.299665	0.150867	0.332979	0.0858485	0.202721	0.363131	0.186661	0.335362	0.166474	0.0345749	0.176605	0.613953	0.110932	0	0.0242859
1	0.0648947	0.136871	0.0440359	0.104301	0	0.0699331	0.446121	0.00671722	0.252781	0	0.174458	0.671664	0.35307	0	0	0	0.16692		1	0	0.0836237	0.157637	0	0	0.0581697	0.139703	0.105925	0	0	0.278829	0	0	0	0	0	0
1	0.78597	0.535062	0.0133714	0.160183	0.354052	0.379024	0.673272	0.587386	0.397515	0.286038	0	0	0.262767	0.556357	0.131341	0.570412	0.325623		1	0	0	0.064437	0.275326	0.915457	0.884129	0	0.0465901	0	0	0.0467607	0	0.443384	0.598236	0	0	0.0811705
1	0.330469	0	0	0	0	0	0	0	0.623164	0	0	0	0.976475	0.292468	0	0.335859	0.0357148		1	0	0.170036	0.0685751	0.0384492	0.935405	0.158321	0.315537	0.52796	0.327905	0.0336764	0.00165395	0.0840106	0.100628	0	0	0	0.271548
1	0	0.0392693	0.304663	0.389484	0	0	0.115818	0.0933428	0.309461	0	0	0	0	0	0	0	0.609736		1	0	0.0400468	0	0	0.297966	0.0115666	0	0.563639	0.00512114	0	0.0507168	0.0371294	0	0.189526	0.434331	0.0514833	0.451545
1	0.905019	0.149213	0.158316	0.600881	0.898434	0.627521	0.224011	0.0855808	0.111669	0.485405	0.301037	0.0557788	0.147811	0.177374	0.308439	0.406014	0.26042		1	0.948161	0	0.106644	0.563667	0.560559	0.165792	0.102651	0.216417	0.131418	0.0531181	0.685655	0	0	0	0	0.101412	0.855057
1	0.190983	0.209671	0.947337	0.142322	0	0.420477	0.0286962	0.236126	0.687686	0.204526	0.341227	0.0166192	0	0.0331629	0	0.145394	0.153225		1	0	0	0	0	0.100006	0.148697	0.186201	0.627945	0.398073	0	0	0.117256	0.866393	0.763395	0	0.0353447	0.452327
1	0.0237779	0.0355272	0	0	0	0	0	0.262852	0.912596	0.0753691	0.011455	0	0	0	0	0	0.367644		1	0	0	0	0	0	0	0	0	0.19794	0.173687	0	0	0	0	0	0.473727	0.352286
1	0.309098	0.0510325	0.0915969	0	0.0571023	0.631908	0.649421	0.31741	0.325482	0.167961	0.683249	0.661336	0.288447	0.463384	0.511287	0.583509	0.390644		1	0	0	0	0	0	0	0.187866	0.101062	0.807051	0.0648918	0	0	0	0	0	0	0
1	0.177093	0.0561412	0	0.0707644	0.471763	0	0	0.455583	0.849068	0.418202	0.877935	0.413751	0.0984526	0.11933	0	0.349206	0.106444		1	0	0.11775	0.12466	0.179627	0	0	0.00787454	0.0863223	0.0837219	0.017983	0.00678646	0.00961392	0	0	0	0.0114093	0.0944525
1	0.408127	0.673748	0.1808	0.419081	0.27553	0.198767	0	0.0715489	0.187217	0.875102	0.354166	0	0.0358215	0.320153	0.714779	0.202626	0.262869		1	0	0	0	0	0	0	0	0.215494	0.307777	0.0460543	0.210033	0.593233	0	0	0	0	0.423742
1	0.212777	0.0144728	0.626379	0.677219	0.495653	0.477643	0.253575	0.386609	0.556283	0.726995	0.798732	0.916302	0.212677	0.178155	0.310913	0.0787565	0.121075		1	0.577196	0.510382	0	0.0266077	0.135196	0.509778	0	0.319149	0.457736	0.00242956	0.335372	0.375549	0.990803	0	0	0	0.444469
1	0.0140091	0.32256	0.342629	0.361869	0	0	0	0.561436	0.990133	0	0	0	0	0	0.461904	0.0606249	0.661724		1	0.497219	0	0	0	0.48646	0.846707	0.173997	0.477088	0.349816	0	0	0	0	0	0	0.130192	0.432025
1	0.0245213	0.0155284	0	0	0	0	0	0.0528963	0.286062	0.0647291	0	0	0	0	0	0	0.154442		1	0.298435	0.022135	0.135698	0.330572	0.318161	0.349606	0.0722587	0.139075	0.583592	0.865018	0.256319	0.13809	0.0748986	0	0.0430873	0.110414	0.230673
1	0.296331	0.39461	0.40302	0.821123	0.218786	0.322069	0	0.256359	0.781753	0.457888	0.392648	0.200243	0	0.070369	0.299111	0.192299	0.120401		1	0	0.00756088	0.0586171	0.00225058	0.0483528	0.105372	0.111454	0.269991	0.355331	0.158842	0.430607	0.111966	0.014883	0.0765481	0	0.12982	0.323473
1	0	0.0395406	0	0	0.500699	0.164515	0	0.383784	0.144666	0	0	0	0	0.110378	0	0.00344515	0.118762		1	0	0	0	0	0	0.152464	0	0.477657	0.121422	0.398474	0.368641	0.0561087	0	0	0	0.146565	0.546372
1	0.298494	0.240247	0.573029	0.761436	0.109562	0.743852	0.50188	0.517016	0.0682339	0.258014	0.367752	0.306993	0.309586	0.638324	0.321083	0.335689	0.11835		1	0.0593202	0.494847	0.498362	0.377083	0.417565	0.514352	0.514836	0.877725	0.36651	0.10512	0.0414296	0.231288	0.400285	0.0797716	0	0	0.401711
1	0.0572871	0.0512225	0.0284504	0.00796987	0.0169888	0.00169343	0	0.056081	0.476631	0.0476286	0	0	0.0138805	0.00360057	0	0	0.409685		1	0.0175858	0.460245	0.151373	0.189642	0.11423	0.654149	0.566698	0.122782	0.0603111	0.267088	0.611296	0.638534	0.214151	0	0.210236	0.394956	0.373602
1	0.0335153	0	0.0975679	0.0951738	0.138852	0.439585	0.678691	0.376143	0.359282	0.183934	0.324351	0.510689	0.345584	0.12312	0.14621	0.301509	0.645549		1	0	0.820385	0	0	0	0.700781	0.105752	0	0	0	0	0	0	0	0	0	0
0.253937	1	0	0	0.618108	0	0	0	0.137505	0	0.307139	0.737134	0.0921418	0	0.456153	0.184694	0	0.550861		1	0	0	0	0	0.101411	0.455222	0.129178	0.505964	0.819957	0.0286613	0.481616	0.0959345	0.0222039	0	0	0.129338	0.378263
0.133424	1	0.289647	0	0.101059	0.505295	0.101059	0	0.0341616	0	0	0	0	0	0	0	0.03699	0.0330972		1	0	0	0.107022	0.0665204	0.272744	0.245031	0.133611	0.160369	0.503731	0.0176792	0.212333	0	0	0	0	0.327771	0
0.991193	1	0	0	0	0	0	0	0.626921	0.638398	0	0	0	0	0	0	0.6065	0.349314		1	0	0	0	0	0.271396	0.249241	0.30154	0.506587	0.0204002	0.00904176	0	0.0063753	0.278462	0	0	0	0.384566
0.417749	1	0	0	0	0	0.709648	0.536264	0.209249	0	0	0	0	0	0	0	0	0.693814		1	0.149315	0.192866	0.142846	0.130952	0.0610333	0.162791	0.120424	0.228229	0.0567347	0.0802954	0.17173	0.117421	0.10894	0.0541703	0.157435	0.150766	0.34713
0.92795	1	0.0363513	0	0	0	0	0	0	0.998609	0.515595	0	0	0	0	0	0	0		1	0.314657	0.285641	0.225334	0.232011	0.0811489	0	0.00816024	0.109083	0.0973483	0	0.0595271	0	0.212259	0.0953166	0.382081	0.052474	0.234054
0.653522	1	1	1	0.954545	0.572727	0	0.00878812	0.543526	0.11501	0	0	0	0	0	0	0	0		1	0.063169	0.294021	0.157579	0.176894	0.0138897	0	0.0416746	0.259926	0.139496	0.0548644	0.131473	0.220269	0.0648865	0.0325409	0.183318	0.366424	0.689971
0.788272	1	0	0.0827934	0	0	0	0	0.0490776	0	0	0	0	0	0	0	0	0.0853443		1	0.525607	0.178879	0.182565	0.318724	0.0679697	0	0.0326685	0.41326	0.286745	0.128853	0.0501152	0.101724	0.0683704	0	0.12557	0.754748	0.905132
0.628983	1	0.0325178	0.0853592	0	0	0.515633	0.0992744	0.206067	0.118466	0.543276	0.0500546	0.247841	0.103267	0.0657218	0.184429	0	0.102392		1	0.0563746	0.575733	0.194609	0.688314	0.17354	0.070334	0	0.421089	0.310384	0.509079	0.117711	0	0.117568	0	0.577278	0.0779617	0.277545
0.563923	1	0.674833	0.0843541	0	0	0	0	0.626979	0	0	0	0	0	0	0	0	0.0467794		1	0.0799367	0.595817	0.245173	0.221756	0.0460929	0	0	0.378057	0.149799	0.089741	0.0109421	0.497737	0.014093	0.188855	0.149603	0.169303	0.621984
0.229623	1	0.144707	0.440153	0.026359	0	0	0.0268265	0.350643	0.415141	0	0	0	0.0611541	0.693282	0.677915	0.913997	0.807501		1	0	0	0.0022313	0.112019	0.0979645	0	0	0.127561	0.687773	0.392981	0.0443749	0	0.0407466	0	0.0883182	0.075395	0.654998
0.0388178	1	0	0.373312	0	0	0	0	0.343253	0.095485	0	0	0	0	0	0	0.254524	0.0282873		1	0.726936	0.858201	0.112056	0.0412803	0.85089	0.424635	0.790536	0.303063	0.894978	0.0901479	0.68022	0.417131	0	0	0	0.13749	0.550239
0.10876	1	0.594486	0.984881	0.697467	0.528534	0.2107	0.653007	0.337422	0.515083	0.1113	0	0	0.0799294	0.886898	0.107209	0.100173	0.398825		1	0.0551925	0.491525	0.246803	0.0639702	0.228506	0	0.295994	0.40612	0.650631	0.496428	0.234144	0.517163	0.0142226	0.189826	0.25983	0.521739	0.971943
0.380685	1	0.16525	0.0565273	0.358006	0.179003	0.251966	0.627183	0.041594	0.732842	0.749919	0.273463	0.666535	0.16998	0.740865	0.170632	0.787713	0.169904		1	0.263129	0.249666	0.316032	0.595472	0	0	0	0.29369	0.00704061	0.519515	0.3928	0.807939	0.231081	0	0.362083	0.616433	0.975418
0.481154	1	0.932628	0.389805	0.463871	0.463871	0.315155	0.010104	0.385465	0.0905473	0	0	0	0	0	0	0.0985471	0.262669		1	0	0.296836	0.195827	0.103354	0.0226934	0.11581	0.233571	0.193072	0.0849265	0.207392	0.211565	0.40086	0.0358157	0.0191701	0.321131	0.185643	0.852719
0.285594	1	0.575595	0.593115	0.644473	0.838124	0.389923	0.238925	0.0436025	0.0992219	0.192754	0	0	0	0.0049076	0.0542082	0.0125891	0.0771062		1	0.325239	0	0.0169036	0.0262526	0.0260467	0	0	0.776626	0.0612129	0.0472194	0	0.0620439	0	0.823566	0.146563	0.101006	0
0.944616	1	0.524209	0.544428	0	0	0.0930673	0	0.163492	0.10391	0.504068	0.0257664	0.257664	0.0286293	0.00879618	0.318771	0.21164	0.19208		0.207743	1	0.164093	0.31239	0.0199716	0.383883	0.710287	0.722673	0.477278	0.442942	0	0.509799	0.679276	0.20662	0.407158	0.407158	0.0407158	0.136062
0.409841	1	0.672923	0.606118	0.606118	0.606118	0	0.592821	0.578751	0.414824	0	0	0	0	0	0	0.0309705	0.197287		0.0534226	1	0.126984	0.705132	0.378787	0	0	0.715191	0.57325	0.457296	0.097522	0	0	0	0	0	0.423127	0.278258
0.526872	1	0.574032	0	0	0	0	0	0.498742	0.181175	0	0.182747	0.0652668	0	0	0	0	0.272406		0.904693	1	0.441783	0.223855	0.0429808	0.0880974	0.406696	0.119886	0.289807	0.21497	0.318545	0.15033	0	0.223003	0	0	0.111843	0.0815666
0.79089	1	0.852796	0.22435	0.0493468	0	0	0.0329412	0.246434	0.33547	0	0	0	0	0	0	0	0.311318		0.109963	1	0	0.675984	0.657873	0	0	0.0877706	0.132726	0.400597	0.278292	0.858796	0.164914	0	0	0	0.543465	0.601154
0.234377	1	0.712162	0	0	0	0	0	0	0	0	0	0	0	0	0	0.874008	0.4119		0.146	1	0.333199	0.998875	0.772623	0.31331	0.325968	0.181096	0.44926	0.0753922	0.0206297	0	0	0.0289639	0.316672	0	0.140658	0.206002
0.104856	1	0	0	0	0	0	0.273474	0	0.371309	0	0	0	0	0.00532883	0	0.128122	0.40222		0.0969138	1	0.304261	0.108898	0.298639	0.31145	0.335834	0.0345415	0.345402	0.129101	0	0.145371	0.262718	0.131821	0.0463649	0.0499315	0	0.0880502
0.0654355	1	0.248168	0.153413	0.103517	0.0244129	0.276679	0.0384059	0.463245	0.871718	0	0	0	0.145268	0.222143	0.0938158	0.0458882	0.179068		0.0136255	1	0	0	0	0.0127318	0.188547	0.10636	0	0.0242798	0	0.150242	0.304389	0.0751825	0	0	0.0351899	0.0710769
0	1	0	0	0.696542	0	0	0	0	0.837641	0	0	0	0	0.132171	0	0.0803777	0.146178		0.190726	1	0.380283	0.723644	0.136975	0.382585	0	0.258666	0.53165	0.861994	0	0	0	0.131214	0.418245	0	0.328064	0.0196786
0.154275	1	0.457135	0.4302	0.6453	0.10755	0	0.296029	0.190398	0.589897	0.426956	0.452865	0.113216	0	0.0996804	0	0.144893	0.123323		0.635601	1	0.129824	0.268386	0.340084	0	0.731249	0.945738	0.354655	0.44545	0.75198	0	0	0	0	0	0.339911	0.561655
0.10515	1	0	0	0.202649	0	0	0	0.0158365	0.292944	0	0.659867	0.106632	0	0.0660772	0	0.0936925	0.112086		0.144413	1	0	0.0500614	0	0	0	0.139908	0.375576	0.0705044	0.245322	0	0.111718	0	0	0.217998	0	0.329363
0.332787	1	0.54399	0.164788	0.0645273	0.506069	0	0.332164	0.192151	0.314271	0.609354	0.752166	0.742477	0.785169	0.790161	0.662156	0.465536	0.333745		0.156986	1	0.145578	0.690314	0	0	0	0	0.0644232	0.0419866	0.0454854	0	0.323204	0	0	0	0.0338067	0.137749
0.241656	1	0.405549	0	0.10022	0.341206	0.259967	0.241329	0	0.209408	0.307522	0	0	0.124833	0.0235945	0	0.748353	0.0915589		0.0773542	1	0.906628	0	0	0	0	0.112918	0.336726	0.244436	0	0	0	0	0	0	0.582396	0.653061
0.0666658	1	0.626507	0.826302	0.386853	0.148219	0.0109792	0	0.00975761	0.52028	0	0	0	0	0.070057	0.145876	0.391814	0.558752		0.379555	1	0.190569	0.163184	0.166637	0	0.472442	0.0611682	0.0875937	0	0	0	0	0	0	0	0.130496	0.459521
0.181763	1	0	0	0	0	0	0	0	0	0	0	0	0	0	0	0.0490658	0.274722		0.428922	1	0.844192	0.616351	0	0	0	0	0.165864	0.307416	0	0	0.136677	0.204122	0	0	0	0
0.611384	1	0	0	0	0	0	0	0	0.898791	0	0	0	0	0.0207873	0	0	0.0087416		0.460435	1	0	0	0	0	0	0	0	0.106169	0.237501	0.467894	0	0	0	0	0	0.117331
0.848171	1	0.791217	0.118149	0	0	0.172716	0.604507	0.0604507	0	0	0	0	0	0.0274169	0	0.0352812	0.453507		0.545667	1	0.283342	0.779564	0.989637	0.664236	0.0972518	0	0.182797	0.0305071	0.423933	0	0	0	0	0	0.248182	0.399604
0.22027	1	0.827385	0.926625	0.827385	0.861557	0.4966	0.29531	0.998102	0.611883	0	0	0	0	0.0475116	0.275437	0.77134	0.250645		0.232024	1	0.142892	0.451642	0	0	0	0.0251335	0	0.0281567	0.028869	0.11204	0	0	0	0	0.764184	0.127927
0.0245144	1	0.896193	0.934227	0.898048	0.896193	0.896193	0	0	0.177475	0.468335	0	0.0939617	0.257074	0.394912	0	0.00071804	0.0373462		0.519569	1	0.920817	0.389725	0.78457	0.837704	0.466416	0.214464	0.301651	0.484581	0.0947411	0.0303787	0.14528	0.222808	0.0973797	0.124923	0.105918	0.138258
0.00831884	1	0.894961	0.894961	0.894961	0.447481	0.360078	0	0.0442139	0.2188	0	0	0	0	0.124403	0	0.54677	0.236913		0.592927	1	0.924186	0.796654	0.632134	0.573222	0.59785	0.117453	0.0799636	0.374836	0.68295	0.400523	0.735097	0.596156	0.312178	0.230775	0.0606624	0.0121844
0.18461	1	0.889703	0.327725	0	0	0.140942	0.108886	0.61967	0	0.767124	0.767124	0.767124	0.767124	0.779946	0.767124	0.124464	0.199845		0.41305	1	0.501233	0.646496	0.194936	0.339302	0.513262	0.0191235	0.189778	0.195313	0.0300803	0.122792	0.0239594	0	0	0	0	0.00353886
0.0940478	1	0	0	0	0	0	0	0	0.463538	0	0	0	0	0.070024	0	0.132654	0.295329		0.167013	1	0	0	0.125319	0.206003	0	0	0.47369	0.743821	0.434038	0	0.223043	0	0	0	0	0.567651
0.297378	1	0.118715	0.235982	0.0105314	0.20045	0	0	0.391566	0.804561	0	0	0	0.214308	0.021886	0	0.56506	0.39256		0.105603	1	0	0	0	0	0	0.0370065	0.277093	0.607749	0	0	0.114427	0.256749	0.837563	0.179478	0	0.374901
0.110008	1	0	0	0	0	0	0	0.0687411	0.538958	0	0	0	0	0	0.127934	0	0		0.51868	1	0.244497	0.665646	0.508996	0.743103	0.824831	0.51529	0.836743	0.578955	0.280567	0.710991	0.68478	0.0653976	0	0	0	0.10914
0.10307	1	0.328973	0.773759	0.660377	0.699835	0.144613	0.56473	0.189561	0.0917516	0.817656	0.829749	0.168546	0.86094	0.270736	0	0	0.210601		0.228614	1	0.507782	0.413287	0.18715	0	0.0739905	0.539831	0.731278	0.569777	0.334459	0.382769	0.345365	0.442959	0.480911	0.707821	0.485237	0.540011
0.349263	1	0.0660256	0.0427661	0.0417877	0	0.129125	0	0.0540052	0.171514	0	0	0	0	0	0	0.0375201	0.327995		0.144019	1	0.958437	0.785298	0.857959	0.627385	0.380293	0.240765	0.179512	0.223032	0.0679067	0.441329	0.534623	0.586858	0.970893	0.655612	0.181917	0.00950019
0.227185	1	0	0	0	0.0763856	0.0237759	0.119079	0.118461	0.0724559	0	0	0	0	0.0362755	0.330633	0.073649	0.0733284		0.114687	1	0.49638	0.293793	0.296236	0.237078	0.083747	0.296387	0.0542679	0.255015	0.251295	0.0979033	0.108672	0	0.107567	0.518149	0.218956	0.326829
0.446204	1	0.206892	0.578734	0.127077	0.205809	0.278518	0.303028	0.495354	0.232848	0.441187	0	0.523245	0.721373	0.120924	0.0964306	0	0		0.775476	1	0.309374	0.233606	0.671056	0	0.154235	0	0.363817	0.444616	0.106709	0.268194	0.166612	0	0.330192	0	0.122141	0.27213
0.132343	1	0.00395651	0	0	0	0	0.0567578	0.00707095	0.0563085	0	0	0	0	0	0	0	0.0889591		0.393691	1	0.302514	0.18542	0.130924	0	0.0182344	0.264962	0.13489	0.450499	0.317787	0.140529	0.38134	0.308852	0.102462	0.0953498	0.0719714	0.313212
0.338935	1	0.1634	0.169975	0.317316	0.580156	0.5726	0.608003	0.585198	0.178988	0.658806	0.534538	0.293954	0.0540561	0.0360409	0	0.0231241	0.160468		0.649857	1	0	0	0	0	0	0.409578	0	0	0	0	0	0	0	0.612802	0.608167	0
0.523428	1	0	0	0	0	0	0	0.143989	0	0.197247	0	0	0	0	0.568582	0.00955202	0.784902		0.459697	1	0	0.108871	0.55655	0	0	0	0.0537196	0	0	0	0	0	0	0	0	0.266357
0.603274	1	0.690248	0.548344	0.451687	0.700037	0.655613	0	0.214864	0.398641	0.374904	0.504052	0.00553677	0.104375	0.678912	0.901083	0.302616	0.392309		0.118205	1	0.596909	0.252617	0.518386	0.238931	0.102258	0.210263	0.18442	0.296923	0.298503	0.221787	0.151294	0.107565	0.0843272	0.178536	0.014979	0.111794
0.307458	1	0.611964	0	0	0	0	0	0.259273	0	0	0	0	0	0.08361	0.427949	0.027129	0.439155		0.588723	1	0.568444	0.491301	0.315916	0.156599	0.256696	0.279589	0.233866	0.34078	0.173328	0.235945	0.1095	0.113306	0.14045	0.160862	0.329423	0.228648
0	1	0	0	0	0	0	0	0	0.840971	0.684858	0	0	0	0	0	0.186686	0.576081		0.515323	1	0.131085	0.168494	0.632151	0	0.0412599	0	0.44266	0.492258	0	0.00661632	0.0731931	0.00616747	0	0	0.0367088	0.569342
0.688162	1	0.199417	0.227502	0.475517	0.748568	0.384051	0.234638	0.0722878	0.0668803	0.637948	0.423404	0.0497994	0	0.185461	0.312352	0.394025	0.173648		0.0779127	1	0.4	0	0	0	0	0	0.587685	0.790047	0	0.363428	0.280359	0	0.28999	0.30449	0.114204	0.227693
0.19816	1	0.662909	0	0	0	0	0	0.918506	0.835292	0	0	0	0	0	0.182431	0.022767	0.248721		0.0140018	1	0	0	0	0	0	0.105838	0.0303976	0	0.0387574	0	0	0	0	0	0	0
0.376109	0.166566	1	0.0742585	0.216618	0.132002	0	0.0109752	0.205478	0.915915	0.574329	0.341742	0	0	0	0.0647696	0	0.153266		0.324906	1	0.39965	0.332728	0.594663	0.184162	0.119499	0.142159	0.255684	0.164173	0.0401587	0.0688567	0.156614	0.0835089	0.261099	0.195472	0.0264557	0.241781
0	0	1	0.291667	0	0	0	0	0.438827	0	0	0	0	0	0	0	0	0.195203		0.0667099	1	0.273892	0.487731	0.67293	0.710308	0.517107	0.463839	0.332228	0.307685	0.10137	0.442821	0.712691	0.718268	0.577225	0.0576014	0.00498732	0.0445713
0.613161	0.413956	1	0.630456	0.320325	0.475715	0.102928	0.240166	0.473625	0.514205	0	0	0	0	0	0	0.0317823	0.355401		0.260837	1	0.568492	0.5164	0.314122	0.169664	0.136248	0.188465	0.418221	0.139274	0.0198165	0.484723	0.114518	0.450188	0.41225	0.298587	0.114955	0.0597468
0.639442	0.327173	1	0	0	0	0.501651	0.300991	0.0347247	0.480589	0.644212	0.429474	0	0.408484	0.612725	0.102121	0.0094472	0.314061		0.569912	1	0.657615	0.571853	0.321076	0.703577	0.748824	0.358189	0.324713	0.177442	0.289293	0.479448	0.220865	0.126262	0.119394	0.169522	0.154	0.0232901
0.246771	0.987733	1	0.668033	0.567108	0.354442	0	0.495112	0.782926	0.588431	0.0686865	0.195211	0.340761	0.340761	0.218165	0.015687	0	0.0881589		0.0344022	1	0.91882	0.383842	0.835374	0.305035	0.103669	0.0736008	0.78656	0.167629	0.0726419	0.378763	0.74443	0.580556	0.216323	0.538258	0.214651	0.0333762
0.0246973	0.583635	1	0.822374	0.936333	0.9075	0.654911	0.936171	0.689323	0.652452	0.429643	0.770902	0.515392	0.290715	0.19255	0.35047	0.113531	0.0737959		0.756189	1	0.710798	0.57149	0.619955	0.626968	0.224306	0.172649	0.301884	0.28731	0.667244	0.376731	0.525481	0.384962	0.238833	0.188621	0.0174954	0.0204579
0.473142	0.450814	1	0.932218	0.276086	0.326146	0	0	0.852085	0.241839	0	0	0	0	0	0	0	0.0207382		0.190346	1	0	0	0.0800932	0.0584345	0.803422	0.927946	0.966885	0.467206	0.0265448	0	0.0739409	0.122097	0.694512	0.352762	0.330284	0
0.537103	0.141344	1	0	0.142012	0.0848127	0	0	0.0882707	0.271886	0.0830868	0	0.0655348	0.917488	0.305829	0	0	0.469166		0.518781	1	0.509975	0.948458	0.948458	0	0.103735	0.115293	0.0809149	0.317139	0.15591	0.274623	0.0693251	0.0795034	0.0482778	0.012206	0	0
0.226487	0.084101	1	0.258543	0.337305	0.296785	0.709771	0.100757	0.0427344	0.0584562	0.133538	0.231941	0.145925	0.110869	0	0	0	0.283052		0.607143	1	0	0	0	0	0.17291	0.245194	0.374915	0.646782	0.290887	0.662004	0.0370247	0.105219	0.495394	0	0	0.0603121
0.0364874	0.891581	1	0.213926	0	0	0.168239	0.322995	0.776881	0.155261	0.17844	0.418058	0	0.08878	0.338827	0.254468	0.11445	0.267491		0.387424	1	0.751345	0	0	0	0.0953277	0.0905277	0.058848	0.289282	0.042336	0	0.0133135	0.404999	0.309891	0.883813	0	0.254747
0.36859	0	1	0.570471	0	0	0	0	0.396404	0.140856	0.445087	0.789546	0.0986932	0	0.446408	0.373639	0.0151834	0.288022		0	1	0	0	0.254339	0.715543	0.569182	0	0.0542757	0.0722757	0	0	0	0	0.319753	0.0752359	0	0.0295245
0.45537	0.253505	1	0.0273355	0.154951	0.515942	0.416884	0.0353831	0.0249945	0.0994529	0.0426269	0.333567	0.524047	0.307183	0.120048	0	0.0601414	0.103154		0.319053	1	0.443837	0.0487011	0.332905	0.230497	0.168099	0.217497	0.293635	0.24297	0.0940167	0.216656	0.216452	0.280627	0.175871	0.208778	0.27529	0
0.838351	0.379637	1	0.456374	0.0343938	0	0.254651	0.189519	0.360509	0.102144	0	0.0622225	0	0.129933	0	0	0	0.413798		0.148714	1	0.801166	0.121811	0.383719	0.370256	0	0.0331499	0.239086	0.101875	0	0	0	0	0	0	0	0
0.056828	0.125389	1	0.801086	0.196314	0.111345	0	0.130613	0.0238363	0	0.112029	0	0.0453952	0.363161	0.254213	0.196137	0	0.0662519		0.797271	1	0.680339	0.61969	0.318673	0.210534	0.457598	0.31959	0.139373	0.31707	0.265531	0.346434	0.00425965	0.045979	0.0722973	0.00135418	0.0972471	0.0229457
0.761761	0.758106	1	0.737112	0.0451255	0	0	0.05466	0.264219	0.172151	0.0884803	0	0	0.0565642	0	0	0.196912	0.708644		0.0517214	1	0.522428	0	0	0	0	0.4951	0.38844	0.340254	0.71204	0.578776	0	0	0.0163668	0	0.045352	0.0786437
0	0	1	0	0	0	0	0	0.282333	0.169852	0	0	0	0	0	0	0	0.129518		0.974343	1	0.588298	0.153242	0	0.0268856	0.35818	0.502981	0.518317	0.809148	0.035815	0.124864	0.146322	0.0399061	0.0816067	0	0	0.039269
0.736601	0.151268	1	0.300219	0	0	0	0	0.190887	0.918009	0.587234	0.791637	0.237494	0.264634	0.374269	0.265775	0.265988	0.536011		0.66683	1	0.434885	0.0585003	0.190565	0.0716271	0.197877	0.395862	0.250893	0.2382	0.0161165	0	0.149697	0.0373871	0.301852	0.126573	0	0.117429
0.139091	0.388036	1	0.217779	0	0	0.180169	0.0385088	0.190892	0.0462275	0	0	0.297681	0.175419	0.113274	0.0152183	0.325191	0.527875		0.181629	1	0.826368	0.623245	0.175521	0	0.104258	0.0306498	0.0129429	0.0567247	0.329554	0.367553	0.414993	0.227271	0.195241	0.0224931	0	0
0.658788	0	1	0.127334	0	0	0	0.228942	0.439684	0.11863	0.089154	0	0	0	0	0.238638	0	0.35		0.699546	1	0.279818	0	0	0	0.00221871	0.153768	0.237544	0.0942165	0.0272264	0.280181	0.368771	0.0236172	0.19493	0	0	0.0680114
0.0722642	0.0688806	1	0.494914	0.273934	0.0571255	0.227751	0.0593219	0.0404273	0.175553	0.425481	0.215376	0.0817623	0	0.00786277	0.165118	0.069236	0.105043		0.709272	1	0.59146	0.226224	0.0573934	0.189069	0.320945	0.0794994	0.0477259	0.023048	0.169054	0.0964831	0.138087	0.172303	0.0437263	0.0255401	0.0713585	0.0508487
0.404248	0.69535	1	0.181551	0.0277692	0.0204955	0.211429	0.158166	0.673062	0.129595	0	0	0.0125016	0.0441214	0.149059	0	0	0.0830982		0.270758	1	0.256177	0.0793511	0.0284681	0.122785	0.195722	0.188618	0.375776	0.340861	0.178661	0.163692	0.118114	0.211886	0.252108	0.0932051	0.335506	0.466632
0	0	1	0.388742	0	0	0	0	0.296772	0.194271	0	0	0	0	0	0	0	0.0336841		0.257292	1	0.34315	0.419803	0.861435	0.482613	0.3332	0.0207921	0.0993988	0.122509	0.0834422	0.111568	0.0853838	0.0212627	0.111128	0.131523	0.0104322	0.0738995
0	0.0677759	1	0.161014	0	0	0	0.119238	0.601568	0.354763	0.570103	0.0589974	0	0	0.621761	0.89699	0.0450416	0.0475535		0.343111	1	0.944091	0.65918	0.714004	0.457703	0.591685	0.076957	0.0255692	0.026049	0.00638587	0.204233	0.297849	0.0564315	0	0.474204	0.263044	0.0227726
0.461224	0.00396087	1	0.978538	0.341219	0	0.0033196	0	0.288925	0.393082	0.344545	0.147662	0	0	0.358225	0.0599811	0.299989	0.401216		0.270308	1	0.811962	0.464536	0.48053	0.377119	0.0406483	0.110886	0.174983	0.13976	0.259839	0.140419	0.301367	0.121883	0.17566	0.265665	0.19977	0.071156
0.113058	0.0776779	1	0.140314	0	0	0	0	0.32475	0	0	0	0	0.27051	0.0601133	0	0.139419	0.589769		0.194743	1	0.804943	0.490259	0.551216	0.318552	0.0667707	0.304236	0.30437	0.173524	0.0550323	0	0.0236292	0.0845813	0.0218337	0	0	0
0.306189	0.26693	1	0	0	0	0	0	0	0	0.470699	0	0	0	0.363585	0.516396	0.128999	0.638782		0.14295	1	0.459315	0.0522797	0.264255	0.260011	0.164089	0.0141333	0.0951958	0.28173	0.694159	0.607827	0.391325	0.245976	0	0	0.0920436	0.0818601
0.515957	0.502256	1	0.542489	0.485803	0.0213256	0.0749287	0.24891	0.913437	0.189033	0.223686	0.101465	0.0171575	0.0706485	0	0.106094	0.0687703	0.692276		0.40898	1	0.0945837	0.368069	0.578607	0.198639	0.223532	0.231569	0.161837	0.176523	0.00831206	0.0873951	0.00106239	0.180065	0.393457	0.103895	0.242596	0.134699
0.473613	0.133548	1	0.318348	0.13852	0.0474219	0	0.221491	0.76649	0.524688	0	0	0.26754	0.22932	0	0.480194	0.743697	0.291866		0.319657	1	0.730055	0.49985	0.34775	0.0110534	0.15958	0.460129	0.642329	0.992651	0.220273	0.203186	0.0579263	0.089553	0.466284	0.974781	0.426685	0.291358
0.181087	0.559085	1	0.955982	0.870833	0.444929	0.235331	0.0416875	0.0979863	0.180477	0.515745	0.86359	0.837222	0.612981	0.473495	0.193986	0.0395257	0.0188528		0.374423	1	0.989253	0.550213	0.186311	0.209502	0.103928	0.659305	0.192977	0.815174	0.0631068	0.217391	0.0531452	0	0	0.245099	0	0
0.0138027	0.0606286	1	0.0714286	0	0.0138874	0	0.0418311	0.0994469	0.0454005	0	0	0.0569323	0	0.142791	0	0.133791	0.463674		0.172178	1	0.0525531	0.277592	0.372622	0	0	0.066936	0.130772	0.298728	0	0	0	0.0968434	0.179073	0.363983	0.56283	0.177141
0.0970362	0.502283	1	0.806602	0.688308	0.867231	0.188631	0.190638	0	0.433773	0.0769585	0.116553	0.0176363	0	0	0.0210347	0.126208	0.154806		0.319353	1	0.124922	0	0	0.182865	0.161192	0	0.0289799	0.0860542	0.0615456	0.0295482	0	0.151802	0.156489	0.0354568	0.312158	0.0319281
0.246458	0.308364	1	0.243387	0.312015	0.390496	0.529715	0.56341	0.246523	0.0667734	0.242686	0.485371	0.954093	0.362481	0.166106	0	0.226753	0.0787713		0.240474	1	0	0.288342	0.0303518	0.303951	0.0827679	0.0418943	0.633418	0.194668	0.197889	0	0	0	0	0.404037	0.169114	0.144441
0.191848	0.216752	1	0	0	0	0	0	0	0.217138	0.615224	0	0	0	0.0513205	0	0.0368541	0.175382		0.506463	1	0	0.0631334	0.177602	0.371255	0.17383	0.0651049	0.248455	0.25134	0	0.0259325	0.214944	0.287763	0	0	0	0.0280927
0.0719657	0.109003	1	0.80702	0.754637	0.251546	0	0.0137553	0	0	0.170573	0.426432	0.426432	0.106608	0.0567897	0	0.0128554	0.131176		0.202593	1	0.330955	0.0113596	0	0.0125763	0.0260229	0.27278	0.128571	0.379905	0.361505	0.374171	0	0.0893863	0.379433	0	0.314445	0.06711
0.444275	0	1	0.915194	0.0971831	0	0	0	0	0	0	0	0.0462223	0	0.0235477	0.193306	0.904723	0.137138		0.387196	1	0	0	0	0.0296534	0	0	0.160817	0.568844	0.258777	0.22643	0	0	0	0	0.84835	0.0732144
0.296279	0.918371	1	0.61663	0.449488	0.460935	0.097764	0.185034	0	0.198736	0.106264	0.144434	0.0491741	0	0.0922123	0.138384	0.241737	0.210253		0.350407	1	0	0.209933	0.236766	0.00465257	0.092844	0.150726	0.225951	0.231306	0.196251	0.040582	0	0	0	0.2489	0.309395	0.599431
0.166555	0.863863	1	0.348375	0.069357	0.125974	0.0157468	0	0	0.109041	0	0	0	0	0.109745	0	0.123493	0.0135038		0.508918	1	0.512257	0.104396	0.910749	0.572613	0.565314	0.195147	0.149005	0.165178	0.170682	0.310633	0.216325	0	0	0.237203	0.180595	0.331131
0.140621	0.605762	1	0.111402	0	0	0.334179	0.560496	0.268695	0	0.673506	0.673506	0.673506	0.673506	0.190284	0.444649	0.691651	0.799086		0.147932	1	0.0422787	0	0.183984	0.210336	0.156114	0.0806015	0.525608	0.473578	0.247557	0.249537	0.462937	0.289939	0	0.142658	0.0162715	0.209973
0	0	1	0.158201	0	0	0	0	0.277989	0	0	0	0	0	0	0	0.0104653	0.0298814		0.0088922	1	0.49375	0.317604	0.0220559	0.193182	0.0598661	0	0.0289342	0.271982	0.0379911	0	0	0.0329068	0.631765	0.557235	0.106088	0.0523143
0.348363	0.424516	1	0.950695	0.38204	0.0571365	0.331979	0.262512	0.24283	0.190577	0.393485	0.116129	0	0	0.040313	0.282191	0.135895	0.0799078		0.342119	1	0.450768	0.467792	0.520968	0.291597	0.376504	0.84374	0.278594	0.329509	0.622792	0.798159	0.228615	0.187705	0.535013	0.381692	0.539648	0.813376
0.615211	0.0206709	1	0.0928307	0	0	0	0	0	0	0	0	0	0	0.398441	0	0	0.0186335		0.124471	1	0.708778	0.0518275	0.337248	0.315273	0.208112	0.140005	0.321519	0.401578	0.3813	0.129191	0.30065	0.19593	0.406304	0.10411	0.044687	0.109874
0.187196	0.521929	1	0.058714	0.299123	0.62327	0.0839911	0.259412	0.131285	0.408593	0.0102364	0	0.0107868	0.0846179	0.319798	0.563762	0.0698409	0.0884625		0.317843	1	0.612902	0.0312725	0.0149228	0.226094	0.455032	0.394843	0.705301	0.736421	0.089104	0.00185938	0.37275	0.544432	0.116245	0.288395	0.274724	0.0220847
0.462178	0.744186	1	0.259329	0.0493443	0.536722	0	0.0938674	0	0.445941	0.732898	0.732898	0.762747	0.732898	0.357238	0.249485	0.611006	0.8322		0.713923	1	0.737628	0.390976	0.0861408	0.136339	0.107945	0.22637	0.137738	0.308108	0.0910329	0.213425	0.123071	0.223794	0.415329	0.590005	0.680162	0.280457
0.245565	0.336942	1	0.981491	0.650021	0.612373	0.204124	0.0138533	0.0410269	0.25406	0	0.225095	0.663639	0.53476	0.382397	0.0817154	0.109244	0.152858		0.407255	1	0.232229	0.390065	0.114007	0.578336	0.391993	0.128436	0.316425	0.099247	0.212936	0.197071	0.295837	0.186816	0.193557	0.367809	0.341502	0.38755
0.0318655	0.941345	1	0.853491	0.828201	0.799161	0.946451	0.809091	0.453529	0.0180016	0.23438	0	0.0798649	0.479189	0.601932	0.205367	0.115107	0.169462		0.216238	1	1	0.287384	0.625718	0.691214	0	0	0.168835	0.410684	0	0	0.563767	0.121005	0.114076	0.66193	0.100083	0
0.707002	0.526547	1	0.202225	0.165595	0.162381	0.249934	0.00329556	0.0172218	0.0117641	0.0112859	0.150327	0	0.115608	0.0866635	0	0.317381	0.527582		0.230373	1	0.286682	0.32596	0.225723	0.191319	0.163192	0.0124694	0.328269	0.17246	0.147182	0.19592	0.228213	0.0876561	0.0904801	0.128741	0.050369	0.107325
0.0795026	0.480258	1	0.00848775	0.0748744	0.174088	0.803579	0.611568	0	0.104415	0	0.116026	0	0	0.150938	0.10609	0.276828	0.0813957		0.728523	1	0.846308	0.0148814	0.282029	0.105192	0	0	0.5159	0.617512	0.0122503	0.18565	0.279825	0.0187761	0.31699	0.117986	0.0434649	0.79053
0.422225	0.606806	1	0.604522	0.661889	0.665737	0.398587	0.166587	0.0529948	0.0496072	0.254783	0.180792	0	0	0	0.108418	0	0.137969		0.154011	1	0.81918	0.223888	0.142835	0.308374	0.345577	0.161154	0.471972	0.356803	0.176597	0.054641	0.113412	0.108796	0.352953	0.416945	0.393534	0.104278
0.0704036	0.180313	1	0.0830527	0	0	0	0.328639	0	0	0	0	0	0	0	0	0	0.347264		0.221986	1	0.197781	0.203505	0.671502	0.294616	0.36769	0.221656	0.199068	0.459911	0.0256583	0.0238371	0.158826	0.588609	0.646212	0.805929	0.517336	0.730342
0.120419	0	1	0	0	0.148071	0.180371	0	0	0.1158	0	0	0	0	0	0	0	0.340959		0.426015	1	0.739284	0.338719	0.397599	0.00671579	0.476455	0.279167	0.0988398	0.61257	0.339804	0.0231809	0	0.446106	0.449204	0.0154336	0.0080236	0.298637
0.429971	0.677916	1	0.915077	0.869707	0.734366	0.443959	0.605275	0.617363	0.743133	0.423945	0.622843	0.23985	0.064539	0.209508	0.0963378	0.0855447	0.102753		0.108482	1	0.962023	0.458455	0.369918	0.250949	0.0983772	0.120405	0.154315	0.886003	0.615569	0.0141995	0.261724	0.135111	0.224409	0.307483	0.578172	0.139911
0	0.226165	1	0.954545	0.569557	0	0	0	0.164929	0.0872429	0.319424	0.178718	0	0.183865	0.163988	0.0351081	0.370529	0.870599		0.274548	1	0.512853	0.0921147	0.330167	0.0608962	0.269605	0.00525135	0.105336	0.0150102	0.323692	0.189322	0.186447	0.385821	0.18708	0.153541	0.00344032	0.468099
0.250834	0.662932	1	0.0452245	0.288097	0	0.00381014	0.394211	0.368802	0.0264479	0.0118567	0	0	0	0.221789	0.320179	0.213733	0.209178		0.0694542	1	0.255131	0.334631	0.100244	0.0296078	0.314448	0.0617919	0.571403	0.863889	0.200116	0.0528483	0.352994	0.123594	0.553837	0.299104	0.345662	0.199247
0.265492	0.0338627	1	0.564428	0.635367	0.102102	0	0	0.124699	0.774622	0.0379883	0.187352	0.196399	0.541524	0.270037	0.353916	0.311815	0.312089		0.335268	1	0.751915	0.311449	0.129406	0.208712	0.275141	0.35768	0.183885	0.242454	0.31969	0.14283	0.142475	0.621093	0.559159	0.29399	0.58721	0.142995
0.150375	0.439801	1	0.335844	0	0	0	0.0895804	0.668906	0.209171	0	0.294359	0.10859	0	0.135903	0.240597	0.0812325	0.75362		0.204381	1	0.752595	0.51911	0.162739	0.29532	0.315652	0.148112	0.0271072	0.00389691	0.0479935	0.148384	0.0530273	0.158797	0	0.337975	0.603009	0.375797
0.24629	0	0	1	0.68261	0	0	0	0	0.273759	0	0	0	0	0	0	0	0.190995		0.121856	0.109496	1	0.411395	0.165443	0	0.463048	0.131622	0.169849	0.141142	0.413206	0	0	0.0989891	0	0	0	0.470578
0	0	0	1	0.881032	0	0	0	0	0	0	0	0	0	0	0	0	0		0.24941	0.224278	1	0.135194	0.0527583	0	0.234311	0.0231307	0.338249	0.163686	0.342119	0.124167	0.181895	0	0	0	0	0.477764
0.182448	0	0	1	0.771169	0.963032	0	0	0.152149	0.0738885	0.402282	0	0	0	0	0.073699	0.518896	0.0070341		0.0464138	0.55016	1	0.511924	0.360642	0.153477	0.277604	0.307021	0.119967	0.03227	0	0.126577	0	0.0738276	0	0	0.0325988	0.0322783
0.872457	0.0901725	0.198754	1	0	0	0	0.32256	0.232113	0.254209	0.748924	0.446664	0.496599	0.993198	0.851313	0	0.222736	0.41415		0.113383	0.0404086	1	0.092949	0.291468	0	0.0248946	0.0748967	0.276645	0.268022	0	0	0	0.401669	0	0	0.176665	0.11199
0.701188	0	0	1	0.888889	0	0	0.711621	0.406292	0.400722	0	0	0	0	0	0	0	0.0897533		0.161831	0.227944	1	0.118854	0	0.723336	0.655266	0.172131	0.277009	0.196749	0.169198	0	0	0	0	0	0	0.788256
0.241648	0.833332	0.162337	1	0	0	0	0	0	0	0	0	0	0	0	0	0	0.629756		0.127792	0.0598667	1	0.320866	0	0.0586195	0.520102	0.153247	0.0880735	0.04971	0.224654	0.466296	0	0	0	0	0	0.441582
0.296526	0	0	1	0	0	0	0	0.74531	0	0	0	0	0	0	0	0	0		0.0790616	0.693895	1	0.467904	0.551947	0.109611	0.299325	0.368419	0.417121	0.298328	0.136142	0	0.407037	0.191923	0.0806357	0	0.210842	0.207649
0.253338	0	0	1	0	0	0	0.224385	0.321224	0	0	0	0	0	0	0	0	0.185665		0.360342	0	1	0	0	0	0	0	0	0	0	0	0	0	0	0	0.25909	0.660515
0.192778	0.0566876	0	1	0	0	0	0	0	0	0	0	0	0	0	0	0	0		0.45678	0.615771	1	0.666514	0.730439	0.465827	0.928403	0.498101	0.108828	0.18383	0.234097	0.0862513	0.576638	0.524638	0.100176	0.144503	0.024757	0.13276
0.600484	0	0	1	0	0	0	0	0.307766	0	0	0	0	0	0	0	0	0		0.103748	0.484787	1	0.52755	0.563373	0.247249	0	0.00862827	0.225366	0.110195	0.0773838	0.094519	0.164199	0.0291964	0	0	0.00875601	0.0611163
0	0	0.182621	1	0.165111	0	0	0	0.145294	0	0	0	0	0	0	0.099232	0	0.214102		0.0739684	0.3	1	0	0	0	0	0	0.00592856	0	0	0	0	0	0	0	0	0.193511
0.302596	0.436187	0.67635	1	0.792435	0.371064	0.623314	0.382078	0.400456	0.217038	0.348007	0	0	0.217331	0.725614	0.0970545	0.237592	0.246806		0.425102	0.883471	1	0.409559	0.605836	0.88864	0.565232	0.311956	0.382347	0.50762	0.101806	0.0360239	0.0960567	0.20937	0.0736349	0.0172107	0.0818969	0.208521
0.243837	0.25845	0.0457577	1	0.350716	0.019941	0.0381477	0.501743	0.213375	0.0484708	0.581257	0.372666	0	0.585916	0.727041	0.323263	0.11014	0.0118732		0.260016	0	1	0.0601852	0.21133	0.556136	0	0	0.328673	0.411004	0.0748007	0.482775	0	0	0	0	0.428746	0.423935
0.581884	0.697486	0.832181	1	0.262197	0	0.11375	0.22975	0.294079	0.661753	0	0.126799	0.0365073	0	0	0	0	0.289073		0	0	1	0.0601852	0	0	0	0.578689	0.669146	0.0443839	0	0	0	0	0	0	0	0
0.00271434	0.178094	0.763217	1	0.494393	0.530253	0.541642	0.415595	0.362437	0.0824687	0	0.230754	0.520413	0.603712	0.658285	0.546387	0.253842	0.18464		0	0	1	0	0	0	0	0	0	0	0	0	0	0	0	0	0	0
0.0475204	0.0389355	0.440806	1	0.564322	0	0	0.0656295	0.401636	0.622834	0.262518	0.262518	0.262518	0.131259	0.0821156	0.352252	0.478143	0.0740321		0.572921	0.167891	1	0.450184	0.789965	0	0	0.114484	0	0.176172	0.2263	0	0.33174	0.841771	0.437644	0.181758	0.770204	0.257702
0.812136	0.041972	0.400182	1	0.20979	0	0	0.146205	0.0273589	0.342656	0	0.0464068	0.417661	0.0974649	0.209311	0.200573	0.182878	0.252205		0.983335	0.920424	1	0.480719	0	0	0	0	0.265071	0.283476	0.614983	0.335121	0	0	0	0	0	0.375299
0.445766	0.575811	0.899336	1	0.724056	0.642352	0.335307	0.571492	0.285323	0.180566	0.226088	0.235884	0.176913	0	0.0273517	0	0.0607333	0.186437		0.374266	0.564568	1	0.418213	0.172677	0.606249	0.529002	0.644565	0.236809	0.367842	0.0986948	0.433947	0.226249	0.216632	0.217742	0.583319	0.537357	0.85546
0.0264405	0.0778462	0.488261	1	0.278822	0.433305	0.321143	0.129863	0.0211421	0.105896	0.543477	0.543477	0.098814	0	0.00573322	0	0.199486	0.0371253		0.36463	0.467115	1	0.690402	0.998902	0.429572	0.284687	0.440039	0.44058	0.178514	0.0157852	0.394464	0	0	0.339831	0	0.0783276	0.0349296
0	0.382692	0.0703409	1	0	0	0	0	0	0	0	0	0.664234	0	0	0	0.0697326	0.0867625		0.370913	0.659552	1	0.988028	0.949608	0.957887	0.372552	0.0130476	0.04478	0.117608	0.225145	0.0501549	0.0373961	0.119849	0.0995928	0.103895	0.2751	0.00168446
0.18335	0.348615	0.93978	1	0.407064	0	0.269452	0.181995	0.340174	0.435285	0	0	0	0	0.0200421	0	0.468955	0.427208		0.0458994	0.378185	1	0.762594	0.875004	0.354261	0.138289	0.0573528	0.154539	0.166533	0.283842	0.120024	0.075843	0	0.141042	0.132478	0.515407	0.855787
0.0723871	0.0552966	0.740147	1	0.647672	0.529441	0.0779226	0.190477	0	0.152633	0	0	0	0.27694	0.136878	0	0.465195	0.101784		0.0395524	0.463308	1	0.971891	0.697974	0.423052	0.186337	0.291722	0.410793	0.0159383	0.0471326	0	0	0	0	0.223408	0.150739	0.035523
0.136354	0.387537	0.787697	1	0.632278	0.658715	0.452302	0.291212	0	0.563381	0.058157	0	0	0.313503	0.418003	0.418003	0.491182	0.151612		0.639254	0	1	0.686741	0	0	0	0.06498	0.508579	0.170596	0.0979909	0.0527191	0.0653528	0	0	0.037811	0.531737	0.257442
0.066633	0	0.584541	1	0	0	0	0	0	0.0248014	0	0	0.0845037	0	0.120997	0.212347	0.943313	0.129536		0	0.218737	1	0.743836	0.695763	0.562125	0.247631	0.811822	0.886756	0.997611	0.613464	0.274359	0.329787	0.045254	0.0543048	0	0	0.482283
0.148524	0.516449	0.768789	1	0.875323	0.41579	0	0	0	0.393679	0	0	0	0	0.00384735	0	0	0.0949806		0.3834	0.507325	1	0.288858	0.461037	0.455412	0.345366	0.543477	0.832749	0.391447	0.543593	0.623631	0.00884838	0.142544	0.200056	0.679166	0.104849	0.241153
0	0	0.506968	1	0.86625	0.220637	0.262516	0	0	0.751796	0.294181	0	0	0	0.0118496	0	0.111257	0.00867695		0.0639366	0.275252	1	0.976596	0.740055	0.203141	0.061192	0.111598	0.458518	0.442296	0.044267	0	0	0	0.0162623	0.234906	0.569607	0.0115913
0.340101	0.0167855	0.963744	1	0.0438065	0	0	0	0	0	0	0	0	0	0	0	0.0169594	0.0112553		0.84256	0.957022	1	0.271468	0.043693	0.27384	0.350427	0.351	0.084433	0.352981	0.0250854	0.0205147	0.0483671	0.175	0.0560599	0.343783	0.161301	0.264936
0	0	0.598291	1	0	0	0.0503718	0	0	0	0	0.455449	0.626243	0.227725	0	0	0	0.00468865		0.93902	0.443567	1	0.474263	0.500978	0.0523446	0.235872	0.147022	0.0704393	0.365069	0.0418715	0.0741229	0.692068	0.887685	0	0.0840275	0.0561047	0.637335
0.180216	0.088055	0.607248	1	0.458165	0.440643	0.671736	0.477353	0.283754	0.27478	0.689095	0.645307	0.510442	0.510442	0.64713	0	0.592967	0.593304		0.193911	0.668142	1	0.14282	0.543294	0.334627	0.37997	0.253012	0.368805	0.318555	0.398331	0.125434	0.226419	0.5045	0.680197	0.490699	0.640742	0.447662
0.0327888	0	0.495552	1	0.315866	0	0	0	0	0	0	0	0.077208	0.463248	0.469301	0.463248	0.107993	0.0148163		0.145257	0.557266	1	0.152348	0.0722409	0.435787	0.351919	0.51752	0.533629	0.113107	0.0521475	0.112504	0.074445	0.0232825	0	0.0321763	0.619827	0.697529
0.0482788	0	0.195351	1	0.727356	0.154225	0	0	0	0.314253	0.483467	0.120867	0	0	0.00780964	0	0.0269225	0.161742		0.437664	0.99322	1	0.431774	0.119005	0.784378	0.401536	0.438057	0.322785	0.844004	0	0.0329592	0	0	0	0.160737	0.141581	0.379741
0.105738	0.110357	0.0321243	1	0.383939	0.423095	0	0.048932	0	0.0538532	0	0	0	0.0478976	0.546594	0.644615	0.0144818	0.0533319		0.377257	0	1	0.948154	0.537927	0.065063	0.244629	0.0701872	0.0175285	0.135306	0.0429818	0.0729731	0	0	0	0	0.342526	0
0.219839	0.336682	0.536218	1	0.533464	0.100736	0	0	0.642652	0.169686	0	0	0	0	0	0	0.0493322	0.0700925		0.897669	0.270777	1	0.0706012	0	0.0451643	0.033057	0.168207	0.30073	0.113859	0.137541	0.473204	0.450786	0.0394282	0.189448	0.0396939	0.0134266	0.973968
0.279135	0.301988	0.270767	1	0.026412	0	0	0	0.114532	0.162347	0.219534	0.439068	0.461982	0.439068	0.445232	0.769899	0.822364	0.17914		0.0500441	0.730422	1	0.496989	0.351181	0.40013	0.52809	0.652501	0.304557	0.558279	0.859735	0.506552	0.328551	0.357488	0.213803	0.043336	0.119776	0.00955949
0.037421	0	0.9375	1	0.299944	0.803733	0.229638	0	0	0	0	0	0.124623	0.70733	0.587346	0.238689	0.443475	0.0524301		0.569434	0.25202	1	0.102989	0	0.141395	0.441932	0.508311	0	0.0570228	0.0146006	0.173885	0	0	0	0	0	0.0352788
0.271618	0.170483	0.275239	1	0.413749	0.234508	0.317386	0.11287	0.190659	0	0.0500305	0	0.0182648	0.112561	0.229363	0.141873	0.0771973	0.066199		0.13712	0.807692	1	0.832184	0.654199	0.176481	0.00899826	0.0872048	0	0.232788	0.586386	0.238341	0.136249	0	0	0.722908	0.277401	0
0.46293	0.213524	0.755455	1	0.302547	0.376608	0.412476	0	0.697739	0.582396	0.0353197	0	0	0	0	0	0.00858335	0.138981		0.101482	0.423707	1	0	0	0.299913	0.0212213	0.0242429	0.0649096	0	0.00885037	0	0	0.161398	0	0	0.25959	0
0.135274	0.249437	0.231847	1	0.344177	0.303824	0.365504	0.402964	0.614011	0.733496	0.299186	0.431599	0	0.0208852	0.00677357	0.0785177	0.0258748	0.0438328		0.402922	0.0401977	1	0.437275	0.315873	0	0.180819	0.149045	0.26089	0.458301	0.0670619	0	0.496843	0.655556	0	0	0	0.594276
0.176763	0.362427	0.596182	1	0	0	0.0456865	0	0.0974034	0.379083	0	0	0	0	0	0	0.0328778	0.158409		0.347	0.36817	1	0.458687	0.104783	0.595924	0.380146	0.504112	0.369719	0.982934	0.026099	0.0362528	0	0.0646527	0.0240919	0.259254	0.135121	0.352748
0.261338	0.207376	0.854899	1	0.239832	0	0.251463	0.666025	0.993287	0.650142	0.0401889	0	0	0	0	0	0.0049928	0.0392044		0.126648	0.777302	1	0	0.0826194	0.294258	0.198506	0.458507	0.0974123	0.250027	0.449627	0.0589183	0	0	0	0.17932	0.16944	0.00277301
0.779656	0.117488	0.661824	1	0.078057	0	0.171767	0.0548229	0.212371	0.461849	0.698226	0.154135	0.0658817	0.00458032	0.127405	0.365325	0.324392	0.149514		0.251996	0	1	0.682652	0	0.0381113	0.0350813	0.157314	0.382265	0.539869	0.158507	0	0	0	0	0	0	0.139522
0.616711	0.330262	0.244041	0	1	0	0	0.745152	0.155734	0.39914	0.581941	0.70167	0	0	0	0.378455	0.195753	0.854609		0.0703522	0	1	0.372293	0.109515	0.0303562	0	0.617137	0.398416	0.961368	0.153585	0.233173	0	0.603916	0.402531	0.0032825	0.11645	0.334995
0	0	0	0	1	0.03125	0	0.307121	0.422291	0	0	0	0	0	0	0	0	0.0710508		0.02751	0	1	0.174672	0.108799	0.00279127	0.218669	0.0310797	0.0462079	0.295064	0.374094	0.234967	0	0	0.715623	0.756061	0.0121706	0.21269
0.347422	0.250165	0	0	1	0	0	0	0.05443	0	0	0.475115	0	0	0	0	0	0.482357		0.23502	0.97778	1	0.242689	0.163917	0.149618	0.0903909	0.422423	0.192765	0.162871	0.11351	0.121214	0.0322023	0.176412	0.177398	0.201151	0.313269	0.0424645
0.0100563	0	0	0	1	0.0277778	0	0	0.0229759	0	0	0	0	0	0	0	0	0.0532039		0.0588347	0.707712	1	0.126636	0.152857	0.00714791	0.0455071	0.0802867	0.133111	0.178787	0.696723	0.406951	0.413341	0	0.0788786	0.0899427	0.0180414	0.0752635
0.366722	0.610554	0.522655	0.2759	1	0.408058	0	0.198326	0.135604	0.142049	0.429597	0	0.530436	0.519883	0.263704	0	0	0.101513		0.0761225	0.524403	1	0.715152	0.175543	0.128093	0.275528	0.147118	0.0934017	0.20339	0.0226453	0.144022	0.0291209	0	0.081359	0.14576	0.132195	0.137779
0.379041	0.127674	0	0	1	0.0635901	0.185659	0	0	0	0	0	0.42609	0.511308	0	0	0	0.011989		0.582916	0.592806	1	0.316961	0.769709	0.759245	0.432776	0.469328	0.961539	0.0763168	0.37995	0.527663	0.55615	0.78337	0.994092	0.801396	0.277575	0.754085
0.265167	0.228942	0.516647	0.540091	1	0.556162	0.449026	0.509212	0.421824	0.285339	0.24846	0.299839	0.363884	0.227272	0.0838038	0	0	0.00450906		0.150428	0.474713	1	0.857964	0.196947	0.456151	0.374898	0.388985	0.179455	0.129404	0.204769	0.0683086	0.108368	0.299808	0.399227	0.29215	0.283845	0.108084
0.0810038	0	0	0.0829067	1	0.787613	0.393257	0	0.202714	0.379381	0	0	0	0	0	0	0	0.237402		0.331458	0.194893	1	0.885721	0.485498	0	0.0383941	0.997702	0.571574	0.251188	0.833389	0.394394	0.109132	0.228469	0.0514645	0.142747	0.39885	0.945566
0.434943	0.0160714	0.44933	0.155936	1	0	0	0	0.275968	0.252045	0	0.235459	0	0.184969	0	0	0.14672	0.16428		0.0399927	0.36364	1	0.443271	0.347095	0.241733	0.426887	0.0570535	0.31098	0.346983	0.71797	0.106852	0.0861621	0.027016	0.259017	0.181954	0.0412853	0.153056
0.521552	0.115045	0.298942	0.88593	1	0.770835	0.275585	0.541448	0.850475	0.532431	0.769093	0.598242	0.407823	0.104611	0	0.305067	0.228009	0.0588992		0.0299664	0	1	0.361376	0.133663	0.281587	0.797587	0.562623	0	0.546882	0.0266657	0.849697	0	0.514242	0.871847	0.958648	0.868495	0.335153
0.791006	0.471928	0.458742	0.598611	1	0.218278	0.397829	0.452308	0.639399	0.445949	0.0310353	0	0.131273	0.320683	0.154024	0	0.0274468	0.127321		0.215744	0.275298	1	0.776623	0.313817	0.402393	0.427407	0.318143	0.196503	0.679662	0.430251	0.347852	0.144464	0.499109	0.319883	0.0377045	0.104739	0.529619
0.538472	0.184703	0.373233	0.778131	1	0.601705	0.332698	0	0.926802	0.105377	0	0	0	0.631121	0.191564	0	0.162785	0.0933318		0.179834	0.0735046	1	0.0789188	0.181876	0	0	0	0.0406528	0.0705742	0.0948034	0.0244145	0.0291081	0.142818	0.591453	0.245136	0.188102	0.879689
0.622208	0	0.147981	0	1	0.387374	0	0	0.239833	0.196416	0	0	0	0	0	0	0	0.241892		0.226804	0.0711076	1	0.175128	0.200808	0.441842	0	0	0.516511	0.0830346	0.12475	0.300015	0.108213	0.0852488	0.145531	0.103337	0.011935	0.682606
0.186716	0.843291	0.480444	0.499451	1	0.280354	0.171152	0.0947039	0	0.414017	0.252302	0.0396147	0.0502158	0	0.659449	0.11802	0.54723	0.127151		0.134814	0.506593	1	0.381469	0.257043	0.198815	0.0459096	0.111156	0.521666	0.280295	0.14279	0.0325257	0.00807828	0.00900809	0.238339	0.102789	0.0413492	0.0889868
0.530132	0.0934553	0	0.148645	1	0	0	0.365513	0	0.144235	0	0	0	0	0.0872075	0.279869	0.897986	0.166416		0.28166	0.937462	1	0.307063	0.367375	0.560631	0.0866178	0.242142	0.778809	0.0107704	0.0707816	0.135068	0.176464	0.72395	0.701523	0.292794	0.468945	0.590541
0	0.00690128	0.108042	0.887671	1	0.640992	0.229424	0.114635	0	0.0777531	0.473134	0.200704	0.200704	0.200704	0.229423	0.200704	0.110805	0.071926		0.06122	0.660387	1	0.409802	0.249049	0.141788	0.0899016	0.0387928	0.0645197	0.311438	0.0660182	0.069613	0.124977	0.117358	0.190261	0.223452	0.314815	0.164623
0.0433573	0.479269	0.420303	0.338783	1	0.697268	0.303256	0.0401578	0	0.0821289	0.372614	0.209373	0.754055	0.685447	0.376709	0.0438034	0.0342315	0.0642362		0.028737	0.381654	1	0.511052	0.107261	0	0.0731208	0.201533	0.150961	0.0835671	0.0468767	0	0	0.0733735	0.565552	0.240143	0.00689102	0
0	0.0831664	0	0.0344828	1	1	0.428571	0	0	0	0.53843	0.923023	0.976754	0.11721	0	0	0.200479	0.0635069		0	0.258093	1	0.320746	0	0.337343	0.274939	0	0.157017	0	0.16205	0	0.392466	0.870973	0.127756	0.0873788	0.0690545	0.05588
0.484672	0.217707	0.222063	0.826063	1	0.5	0.0601408	0	0.306584	0.867255	0	0	0	0.146888	0	0.0310266	0.156587	0		0	0.616	1	0.0205047	0.0544634	0.0473425	0	0	0.774472	0.488466	0.0223874	0.182893	0	0.191746	0.140509	0.140346	0.0378196	0
0.123578	0.0990007	0.152793	0.985163	1	0.272656	0.118581	0.521646	0.395204	0.701789	0.290309	0.0656714	0.128878	0.0549881	0.571943	0.980403	0.154223	0.296653		0.571737	0	1	0.00930579	0.00563282	0.434218	0.337565	0	0	0.267251	0.0742644	0.100345	0.484009	0.0307039	0.506404	0.0643628	0.00561124	0.190741
0.103593	0.258174	0.495898	0.39335	1	0.896031	0.470792	0.387857	0.0414304	0.82675	0.572758	0.0538209	0.364113	0.0587724	0	0.247622	0.198474	0.0105362		0	0.228044	1	0.251924	0	0	0	0	0.259295	0.117398	0	0.03358	0	0	0.0979589	0	0.024488	0.521884
0.275091	0.0269431	0.0645226	0.0691163	1	0	0.318288	0.48181	0	0.168295	0	0	0	0	0	0	0.0280406	0.229145		0.0404466	0.0619085	1	0.724018	0.0983956	0.0141522	0	0	0.264199	0.115409	0	0.0139481	0.290422	0.687371	0.277638	0.656478	0.285449	0.0458563
0.269864	0.102751	0.00340993	0.216202	1	0.374508	0.618292	0.212953	0	0	0	0	0	0.0394954	0.309722	0	0.0433201	0.0326885		0	0.831031	1	0.065596	0.0444346	0.0386857	0	0.384348	0.142945	0.054595	0.0253736	0.0149658	0.459769	0.0115234	0.0178179	0.0107673	0.0252746	0.371279
0.126973	0.079879	0.0213059	0.805379	1	0.0110021	0.0320451	0	0	0	0.689991	0.724491	0	0	0	0	0.118071	0.353053		0	0.4	1	0.00173345	0.0276212	0	0	0	0.231174	0.235897	0	0	0	0.00424306	0.262431	0	0	0.218043
0.119094	0.0144558	0.0438344	0.627667	1	0.840676	0.474357	0.362132	0.289161	0.602338	0.226216	0.135617	0.173067	0	0.119309	0.187486	0.0388838	0.0649887		0.160849	0.0555105	1	0.363932	0.282425	0.419872	0.362098	0.169346	0.0747115	0.193927	0.223264	0.108297	0.165591	0.0448107	0.227101	0.149829	0.0124231	0.192376
0.481503	0.248696	0.115679	0.34536	1	0	0	0.413306	0.588758	0.105207	0.301944	0.234958	0.362296	0	0	0.706161	0.146175	0.0606742		0	0.953333	1	0	0.17983	0	0	0	0.571703	0.292288	0	0.0797639	0.537567	0.0273997	0.423663	0.00241131	0.00318884	0.215277
0.578547	0.198774	0.162727	0.399726	1	0.579187	0.515901	0.0257951	0.0684129	0.0542567	0.197858	0.0679152	0.0133295	0.387574	0.472742	0.298485	0.0119024	0.338802		0.16122	0.727707	1	0.737447	0.197018	0.0864549	0.432277	0.145608	0.127938	0	0	0.22038	0.0269004	0.00698102	0.125165	0.419393	0.133376	0.561991
0.167526	0.0556591	0	0.23263	1	0	0.0217343	0.449093	0.322067	0.518852	0.983192	0.0993899	0	0	0.199511	0.26645	0.102612	0.592077		0.23265	0.20185	1	0.696243	0.529489	0	0.0758148	0.14296	0.0212831	0.138621	0	0.0503973	0.0187755	0	0.162802	0.105303	0.0953543	0
0.017009	0.150844	0.918184	0.776339	1	0.756905	0.314627	0.138508	0.0343592	0.915173	0.773771	0.0551826	0.138609	0.143141	0.744011	0.411747	0.166571	0.140625		0.169451	0.583306	1	0.73458	0.417465	0.066781	0	0.0537316	0	0.0460009	0.0153965	0.0246546	0.00612337	0.0309978	0.25605	0.583477	0.450694	0.041336
0.157593	0.0307295	0.0558718	0.568807	1	0.839119	0.569842	0.371536	0.236902	0.832632	0.384695	0.185842	0.232919	0	0.250542	0.334253	0.0603704	0.0830786		0.00749368	0.39939	0.150386	1	0.934088	0.440337	0	0.372508	0.483376	0.348471	0	0	0.269336	0.218624	0	0	0	0
0.0593528	0.133718	0.209795	0.845211	1	0.0907857	0	0.0729749	0.186446	0.28205	0.32966	0.71057	0.0897398	0	0.21571	0.281282	0.225763	0.648127		0.0746331	0.0430926	0.367964	1	0.729754	0	0.955267	0.0505189	0	0.230993	0	0	0	0	0	0	0	0
0.258037	0.0881662	0.0754801	0.0670935	0.277086	1	0.0856158	0.10903	0.0150482	0.430959	0.837502	0.21564	0	0	0	0.288962	0.385282	0.284487		0.0456798	0.0257902	0.489731	1	0.438776	0	0.732845	0.310997	0.217759	0.152399	0.159238	0.616987	0	0.0922787	0	0	0.0835922	0.0524212
0.166694	0	0	0	0.330366	1	0.0831214	0.658644	0.654663	0	0.622971	0.355983	0.750715	0.64347	0	0	0	0		0.0185109	0	0.150277	1	0.458295	0	0	0	0.225809	0	0	0	0	0	0	0	0.511726	0.281408
0.37364	0.574067	0.573419	0.082409	0.82844	1	0.807679	0.702207	0.819901	0.473265	0.186686	0.398813	0.477116	0.380575	0.236516	0.411587	0.433234	0.103334		0.0447943	0.137771	0.822949	1	0.0572218	0	0	0	0.0690563	0.0582582	0.112527	0	0	0	0	0	0	0.180144
0.0370982	0.230097	0.0364765	0.476655	0.730266	1	0.711895	0.294425	0.359572	0.148794	0.147287	0.0894938	0.2328	0.271599	0.00986663	0.473598	0.682032	0.524234		0.243158	0.228783	0	1	0	0	0	0	0	0	0	0	0	0	0	0	0	0.642011
0	0	0	0	0	1	0.902256	0	0	0	0	0	0	0	0	0	0	0		0.21534	0.199536	0.21296	1	0.218807	0	0	0.048775	0.0900159	0	0	0	0	0	0	0	0	0.0333918
0.189511	0.375549	0.230056	0.0155584	0.203467	1	0.425069	0.100375	0.440663	0.234628	0.0175197	0.0922255	0.0543472	0.067973	0.0397066	0.162885	0.0752253	0.238204		0.417255	0.854612	0.56062	1	0	0.3964	0.810818	0.0514354	0.136152	0.529879	0	0	0	0.457688	0.442554	0	0.196037	0.459318
0.0522894	0	0.859974	0.509721	0	1	0.535714	0	0.0529218	0	0	0	0	0.226396	0	0	0	0.115148		0.0225902	0.0259844	0.289621	1	0.512695	0	0.0874058	0	0.143214	0.475483	0.535027	0	0	0	0	0	0.063597	0.281007
0.419846	0.461399	0.380548	0.338131	0.489918	1	0.938253	0.624702	0.587432	0.0765248	0.336132	0.460588	0.24587	0.171157	0.256736	0.0973825	0.317182	0.0672428		0.00807005	0	0	1	0	0	0	0	0	0	0	0	0	0	0	0	0	0
0.681541	0.931264	0.748858	0.084972	0.69212	1	0.258631	0	0	0.326525	0.147482	0	0.287263	0	0.213098	0.169038	0.563782	0.142809		0.0619853	0.0236994	0.209091	1	0.198845	0.361114	0.745456	0.395869	0.406692	0.0920536	0	0	0	0	0	0	0	0.256214
0.135435	0.0131378	0	0	0	1	0.476386	0.82501	0.476006	0.688783	0	0	0	0	0	0.507767	0.0751481	0.172576		0.82329	0	0	1	0	0	0	0.916745	0	0	0	0	0	0	0	0	0	0.464078
0.0305267	0.0298767	0.0679975	0.123356	0.7256	1	0.671025	0.715183	0.371328	0.679721	0.385537	0.348241	0.348241	0.400224	0.291733	0.198634	0.0411683	0.0998019		0.00333833	0.218698	0.702263	1	0.49948	0	0	0.13191	0.453677	0.152637	0	0	0	0.216799	0	0	0	0
0	0.181736	0.971602	0	0.381818	1	0	0	0	0.273673	0.467097	0	0	0	0.00756544	0	0.950869	0.927573		0.12173	0	0	1	0	0	0	0	0	0.322679	0	0	0	0	0	0	0	0
0.181495	0.0639706	0.580912	0.6863	0.67812	1	0.928181	0.114427	0	0.0283024	0.301822	0.504998	0.701663	0.734528	0.540122	0.207939	0.297596	0.0283732		0.121521	0	0.633204	1	0	0	0	0.0787261	0.271438	0.289699	0.21291	0	0	0	0	0	0.135347	0.0113109
0.178266	0.65544	0.610908	0.176582	0.826626	1	0.0628829	0	0	0.453633	0.357408	0	0	0.77444	0	0	0.13174	0.0753745		0.00396623	0.00728097	0.975921	1	0.596307	0.0205623	0	0	0.110631	0	0.0310109	0.148852	0	0	0	0.258119	0.351146	0.1485
0.0900705	0.523407	0.361292	0.41066	0.441363	1	0.369727	0.321425	0.25714	0.300299	0.390389	0.0291422	0.126783	0	0.0766818	0.265438	0.442497	0.225925		0.0168382	0	0.116301	1	0.124532	0	0	0.255568	0.151253	0.368706	0.996713	0	0	0.0757175	0.206961	0	0	0.0444398
0	0	0	0	0.766693	1	0.555556	0	0	0	0	0	0	0	0	0	0.0422621	0.288203		0.0189718	0	0	1	0	0	0	0	0	0	0	0	0	0	0	0	0	0.378313
0.309163	0.576186	0.549614	0.606684	0.709792	1	0.649604	0.319856	0.584377	0.688539	0.671781	0.716848	0.416007	0.127435	0.0326253	0.168908	0.356713	0.324869		0.228446	0.00734117	0	1	0	0.0536904	0.872444	0.0274251	0.131638	0	0	0	0	0	0	0	0	0.153319
0.166077	0.4034	0.506649	0.717908	0.593037	1	0.515676	0.119212	0.348604	0.489941	0.342401	0.476141	0.0807062	0.11247	0.387448	0.13351	0.120347	0.150612		0.217022	0.152785	0	1	0	0.641184	0	0.140232	0.0658413	0	0	0.154899	0	0.662317	0	0	0	0.131441
0.0458885	0.00402179	0.0202	0.36625	0.395969	1	0.339504	0.0224878	0.0795056	0.155806	0.152075	0.0451757	0.107322	0.0490775	0.0284476	0.143619	0.0216657	0.0894055		0.32064	0	0	1	0	0	0	0.873544	0	0.0874269	0	0	0	0	0	0	0.554215	0.413114
0.344195	0.283304	0	0.0103764	0.177576	1	0.340973	0	0.117033	0.777722	0.731785	0.459441	0.401838	0.21841	0.0728034	0.0520198	0.0175746	0.197535		0.494532	0	0.221943	1	0.629186	0.693968	0.567792	0.577787	0.383822	0.29119	0.124106	0	0	0	0	0	0.719657	0.853546
0.0306639	0.0480879	0	0.0245333	0.232528	1	0.85774	0.562584	0.0626729	0.257208	0.0347853	0.159319	0.0576924	0.389627	0.454801	0.437352	0.129389	0.187829		0.0362013	0.00939835	0	1	0.484848	0	0	0	0	0	0	0	0	0	0	0	0	0.16353
0.456341	0.0864332	0.332424	0.465981	0.472572	1	0.91478	0.42241	0.309935	0.308807	0.0290709	0.00487514	0.0197771	0.0998937	0.203821	0.00510323	0.140455	0.0350862		0.103096	0.691055	0.770008	1	0.896582	0.0968602	0	0.0300291	0.0485752	0.0967336	0.18732	0.0454024	0.348276	0	0	0	0.0595483	0.302249
0.320127	0.471911	0.230025	0.221719	0.673232	1	0.479216	0.499086	0	0.0716847	0.631256	0.79811	0.545833	0.317024	0.106525	0.23583	0.102047	0.207861		0.127722	0.00626807	0.3409	1	0	0	0.0571562	0.0485371	0.315913	0.535162	0.342233	0	0	0	0	0	0.104115	0.166739
0.218776	0.332495	0.236944	0.460934	0.0776283	1	0.827645	0.578622	0.375096	0.0579086	0.0468702	0.0852981	0.178914	0.202223	0.0701247	0.0969082	0.0902992	0.0756341		0.0420411	0	0	1	0	0	0	0	0	0	0	0	0	0	0	0	0	0.0492823
0.402292	0.461346	0	0	0	1	0.219048	0.0535313	0.445245	0.280636	0.473292	0.234127	0	0	0.0558266	0	0.0154265	0.119935		0.0768256	0.762785	0.47226	1	0.250444	0	0	0.311926	0.310018	0.260893	0	0	0	0	0	0	0	0.0386882
0.063085	0	0	0.825907	0.703057	1	0.333933	0.144984	0.30284	0.460305	0.0139118	0.0752275	0.989254	0.438659	0	0.856946	0.0246573	0.0128753		0.869806	0	0.235749	1	0.936485	0.588604	0.966603	0.274789	0.475878	0.28904	0.128142	0.332905	0.419867	0.50285	0.183124	0.128823	0	0.626654
0.506924	0.500082	0	0	0.887324	0.779556	1	0.945496	0.836604	0.392941	0.183724	0.487352	0	0	0	0	0.213704	0.250766		0.227264	0.786732	0.937705	1	0.596794	0.0835502	0.178375	0.398757	0.641481	0.127114	0.0321167	0.307573	0.931115	0.926981	0.632417	0.14121	0	0.22525
0.383562	0.0830743	0	0.0173357	0.947653	0.498935	1	0.5217	0.0343293	0.0657714	0.073962	0.381488	0	0	0	0	0	0.260441		0.617705	0.780698	0.206874	1	0.00592892	0.678539	0.0833886	0	0.286647	0.0503953	0.115023	0	0.452332	0.0119698	0	0	0	0.791665
0.516248	0.923064	0.0460749	0	0	0.412745	1	0.630738	0.177724	0.712594	0.553525	0.691213	0.323655	0	0	0	0.0374889	0.60047		0.443462	0.93459	0.507941	1	0.378502	0.619735	0.670185	0.00582415	0.730232	0.515434	0.268865	0.169051	0.18063	0.238637	0.0338271	0	0.209877	0.489718
0.0805031	0.0805054	0	0	0	0.144039	1	0.972601	0.186545	0	0.036474	0.221723	0	0	0	0.504917	0.227553	0.117744		0.296263	0.524029	0.271308	1	0.622613	0.379832	0.236161	0.144135	0.472933	0.553916	0.307101	0	0.300506	0.150887	0.122632	0.0065357	0.0157946	0.656139
0	0	0	0	0	0.129477	1	0.737869	0.770464	0.838085	0.342017	0	0	0	0.208324	0.208324	0.0624973	0.0743735		0.471857	0.49779	0.578287	1	0.457378	0.101767	0.281506	0	0.207349	0.0521546	0.418786	0.258391	0.21631	0.00287814	0	0.0281784	0.211018	0.0996017
0.171181	0.18608	0	0	0	0.644777	1	0.377358	0	0	0	0	0	0	0	0	0	0.052307		0.233799	0	0.103389	1	0.599192	0.0332524	0.210406	0.110898	0.277554	0.131487	0.184445	0.0395954	0.348319	0.00326853	0.00404501	0.0954843	0.186332	0.14912
0.585967	0.138325	0.0844559	0.65722	0.538601	0.611667	1	0.677	0.171504	0	0.0891531	0.164229	0	0	0	0.27703	0.161148	0.0574499		0.247609	0.195874	0.0947811	1	0.556697	0	0.262282	0.280716	0.635742	0.462081	0.0115007	0.0767666	0.430136	0.0165997	0	0	0	0.0750023
0.085401	0	0.542198	0	0	0.733333	1	0.0611676	0.348715	0.97894	0	0	0.747233	0	0	0	0	0.00172771		0.398704	0	0.472268	1	0.318493	0.372266	0	0.196112	0.603026	0.514825	0.17145	0.00768125	0.136139	0.227003	0.284625	0.130707	0.114547	0.766408
0	0	0	0	0	0	1	0.371431	0.0974157	0	0	0	0	0	0	0	0	0.0203123		0.419987	0.695365	0.487065	1	0.505248	0.261306	0.713826	0.413571	0.85299	0.248079	0.1162	0.265595	0.603318	0.155039	0	0.0895523	0.251732	0.0857706
0.250723	0	0.30321	0.400721	0	0.0936645	1	0.398581	0.617115	0.200079	0	0	0	0	0	0	0.4088	0.454595		0	0	0	1	0.192308	0	0	0	0.0973731	0.4097	0	0	0	0	0	0.807443	0	0.00433599
0.264078	0	0	0.0986011	0.38682	0.312668	1	0.679523	0.191284	0	0	0.100994	0	0	0	0.0527538	0.15257	0.289823		0.210443	0.347867	0	1	0	0	0	0	0.0334424	0	0	0	0	0.233167	0	0	0	0.348471
0.14644	0	0	0	0.680386	0.708934	1	0.127588	0.162971	0.195585	0.495313	0.272724	0.386337	0.215906	0	0	0	0		0.345951	0.187395	0.511087	1	0.890506	0.642437	0.822387	0.445722	0.248929	0.0626986	0.542902	0.560706	0.7126	0.24879	0.183245	0.113212	0.0554492	0.0974364
0.00124545	0	0	0	0.219052	0.854664	1	0.731725	0.537749	0.235227	0	0	0.594798	0.196509	0.0242751	0.183104	0	0.0128204		0.411581	0.0136105	0	1	0.173077	0.0185841	0	0.237362	0.194318	0.466384	0.412811	0.122234	0.0305799	0.119391	0.288287	0	0	0.170812
0.222326	0.0244398	0.316656	0.477337	0.625	1	1	0.0745392	0.680938	0.273397	0	0	0	0.367176	0.895418	0.135276	0.746484	0.857713		0.829661	0.879938	0.451823	1	0.245596	0.0756499	0	0.151457	0.326177	0.287619	0.502785	0.0549237	0.0339261	0.233486	0.26071	0.616227	0.46807	0.266563
0.0678257	0.144286	0.128204	0.124197	0.0164369	0.393817	1	0.471663	0.359171	0	0	0.0282841	0	0	0.125375	0.296338	0.242458	0.108699		0.319173	0.105886	0.256284	1	0.553158	0.276796	0.0553592	0.149925	0.176645	0.453033	0.133337	0	0.158313	0.0459784	0.193206	0	0.132099	0.0303967
0.146347	0	0.715351	0.586231	0	0.461814	1	0.844552	0.253366	0	0	0.627324	0.752789	0.752789	0.376394	0.0799681	0.129179	0.120343		0.216819	0.0642818	0.165164	1	0.248473	0.136629	0.0634538	0.00853463	0.271146	0.54511	0.0802061	0	0	0.00733865	0.310096	0.0992351	0.245963	0.0851659
0.151177	0	0	0	0	0	1	0.205617	0.535141	0	0	0	0	0	0	0	0.151169	0.223546		0.484443	0.116522	0.219844	1	0	0	0.493309	0.118864	0.591641	0.251016	0.608456	0.0467957	0.763776	0	0	0	0	0.309889
0.0465919	0.0504251	0	0.00766571	0.127526	0.627804	1	0.394091	0.0445551	0.367383	0.0667797	0.0725866	0	0	0.0350401	0.0238793	0.0440849	0		0.289362	0.0391944	0.661833	1	0.388605	0.285931	0.723413	0.0930284	0.05854	0.0287172	0	0	0	0.0105041	0.0932688	0	0	0.85224
0	0	0	0	0	0.833333	1	0.525714	0	0	0	0	0	0	0	0	0	0.502248		0.0961556	0	0.506926	1	0.0262506	0	0	0.207385	0.194152	0.978394	0	0	0	0	0	0	0	0
0.381434	0.151429	0.152246	0.0901275	0	0.0227185	1	0.107885	0.116652	0.1362	0.57641	0.339574	0.237301	0.0889878	0.046044	0.014469	0.0178034	0.188451		0.155084	0.216518	0.281945	1	0	0	0	0	0.300824	0	0	0	0.673563	0.829001	0	0	0	0.513087
0.29594	0.244475	0.155899	0	0	0	1	0.0209808	0.152617	0.230232	0.771317	0	0	0	0.116932	0	0.0153565	0.346778		0	0	0	1	0.653464	0.509625	0	0	0	0.381286	0	0	0	0.606932	0.674369	0	0	0
0.446763	0.203113	0.162907	0	0	0	1	0.290792	0.340071	0.102807	0.539735	0.181727	0	0	0	0	0.00829193	0.229646		0.189635	0	0.3956	1	0	0	0	0	0.261797	0	0	0	0.117195	0.504841	0	0	0	0.303251
0.0822659	0.0260212	0.0159443	0.0964768	0.256185	0.589532	1	0.575809	0.233566	0.0448402	0.456512	0.588079	0.242051	0.216434	0.207997	0.314171	0.0867652	0.168623		0.874994	0.580838	0.977472	1	0	0	0.318178	0.726574	0.885645	0.772726	0.995591	0.995591	0.130106	0	0	0	0	0.379557
0.0180561	0.103001	0.550468	0.296697	0.365934	0.60249	1	0.737185	0	0.710346	0.521865	0.207537	0	0	0.0632643	0.892793	0.636903	0.464303		0.000502089	0.19144	0.44948	1	0.0658981	0.130002	0.276333	0.0586098	0.465815	0.741269	0	0	0	0	0	0	0.0394757	0.0457618
0.113626	0.699388	0.476289	0	0	0.58776	1	0.707646	0	0.334974	0	0	0	0	0.127307	0.219377	0.64836	0.153022		0.256355	0.244602	0.302201	1	0.65015	0.351366	0.347944	0.37316	0.178586	0.244932	0.17083	0.179175	0.00545867	0.0459799	0.184145	0.114539	0.0624578	0.197611
0.0719029	0.269132	0.0804437	0.343116	0.00832806	0	1	0.572917	0	0.139177	0	0	0	0	0	0	0.589424	0.232072		0.0086747	0	0.367112	1	0.899683	0.628403	0.00600892	0.104756	0.675174	0.340971	0.264227	0.148515	0.264361	0.713776	0.0296712	0.793703	0	0.373586
0.328439	0	0.0536229	0.250702	0.564173	0.498386	1	0.572016	0	0.187125	0.0763951	0.371799	0.559474	0.199477	0.551273	0.739855	0.64491	0.345595		0.0178525	0.536806	0.337791	1	0.930262	0.904572	0.586062	0.958617	0.38666	0.612552	0.965501	0.801372	0.78251	0.206771	0.210159	0	0.606622	0.259232
0.173645	0.683516	0.556016	0	0	0.0714286	1	0.23913	0.144918	0.324281	0	0	0	0	0.0407751	0.174705	0.786315	0.148373		0.490643	0	0.241078	1	0.14941	0	0.0271047	0.273868	0.309225	0.039226	0.0159951	0.268224	0	0	0.203602	0.924425	0.0153518	0.43951
0.563358	0.434703	0.296573	0.0933807	0	0	1	0.312902	0.18052	0.200853	0	0	0	0	0.0521715	0	0.984341	0.630632		0.105418	0	0.133189	1	0.528527	0	0.392504	0	0.533552	0.311036	0.613412	0.295527	0.0563698	0.471843	0	0.149097	0	0.224332
0.159638	0.0590975	0.489524	0.515899	0.447918	0.50707	1	0.479893	0	0	0	0	0	0	0.166016	0.431229	0.484934	0.229381		0.481269	0.767142	0.995816	1	0.64721	0	0.245809	0.0563337	0.161244	0.272123	0.750132	0.806194	0.796742	0.28845	0.0708078	0.05368	0	0
0.108775	0.532348	0.472498	0.0886585	0	0	1	0.482749	0.278509	0	0	0	0	0	0	0	0.52488	0.622463		0.175	0.0596961	0.453866	1	0.438351	0.613469	0.0714206	0.205032	0.140618	0.10607	0.354884	0.635561	0.444909	0	0.0218072	0.11934	0.395853	0.137056
0.0136451	0	0.149369	0.126964	0	0.237924	1	0.62648	0	0.113377	0.497134	0.323891	0.508972	0.462702	0.0769957	0	0.158401	0.0310087		0.0734067	0.00543786	0.267903	1	0.0560684	0.0374249	0.218376	0.177481	0.493784	0.155525	0.26545	0.206588	0	0	0.067921	0.255168	0.11006	0.342379
0	0.504487	0.840957	0.620907	0.650932	0.620907	1	0.239463	0	0.411549	0.311202	0	0	0	0	0.0778442	0.441681	0.0217518		0.38949	0.42713	0.204374	1	0.620514	0.0751141	0.18824	0.0322313	0.11677	0.0891701	0.153798	0.0685988	0.0631094	0.126564	0	0.0832716	0.0906603	0.0834311
0.0105745	0.0985122	0.0461041	0.260505	0.178136	0.331936	1	0.333749	0.1898	0.0953239	0	0	0	0	0.00500314	0.236467	0.37275	0.0233789		0.086519	0.592485	0.8611	1	0.0851415	0.451413	0.166132	0.144772	0.211018	0.622823	0.524272	0.573804	0.408776	0.424677	0.135039	0.214778	0.283715	0.149484
0.332112	0.0634587	0	0	0	0.0462127	1	0	0	0.057706	0	0	0	0	0	0	0.0601515	0.028716		0.14265	0.71805	0.820377	1	0.675432	0.630932	0.309293	0.189111	0.0874362	0.306636	0.416997	0.459863	0.541686	0.367896	0.451374	0.311212	0.0349269	0.065809
0.513868	0.0167547	0.586144	0.011924	0	0	1	0	0.158715	0.740448	0.145222	0	0	0.30438	0	0	0.310911	0.752597		0.184812	0.598394	0.873423	1	0.565864	0.141195	0.328954	0.0959505	0.520998	0.298476	0.312876	0.14398	0	0.0801656	0	0.636814	0.47163	0.0417043
0.171299	0.599148	0.0651011	0.0390124	0.228237	0	1	0.421391	0.571295	0	0	0	0	0	0	0	0	0.577574		0	0.219932	0.675168	1	0.592762	0.104648	0.206911	0	0	0.0222112	0.302496	0.599688	0.34332	0.194306	0.490625	0.19625	0	0
0.194679	0.191276	0.235451	0.0142913	0.248713	0.138611	1	0.998648	0.470386	0.187596	0.0073575	0.120526	0.424677	0.16331	0.0650248	0.00279501	0.000522448	0.493886		0.481197	0.498081	0.212439	1	0.958836	0.541198	0.967193	0.599981	0.206834	0.77775	0.843099	0.337367	0.142301	0.462082	0.173943	0.85232	0.360882	0.243476
0.478411	0.0940969	0.0865271	0	0	0.836045	1	0.734113	0	0.128406	0	0	0	0	0	0	0	0.426081		0.164067	0	0	1	0.0654657	0.0764347	0.0478331	0.0247793	0.443692	0.318259	0.027005	0.429363	0.13863	0.136513	0	0	0.119678	0.812166
0.131684	0.0456659	0.0190331	0.0143793	0	0	1	0.75649	0.362417	0.127328	0	0	0	0	0	0	0	0.0484014		0.178387	0.0115895	0.162012	1	0.400192	0.189171	0.399508	0.411467	0.398578	0.272847	0.358786	0.443666	0.326899	0.353636	0.307426	0.19756	0.0827672	0.470608
0.213095	0	0.392173	0	0	0.191601	1	0.100807	0	0	0	0	0	0	0	0	0	0		0.168296	0.25631	0	1	0.981208	0.386571	0	0	0.816061	0.386471	0.21447	0	0	0.247587	0.0776074	0.479892	0.845827	0.563738
0.328141	0.251815	0.02802	0.101449	0.582801	0	1	0	0	0	0	0	0	0.120946	0	0.200666	0	0		0	0.127567	0.829637	1	0.437207	0.282095	0.792529	0.373684	0.252757	0.160076	0.149344	0.166519	0.524861	0.624904	0.618706	0.348049	0.739351	0.094748
0.316304	0.179743	0	0.0305912	0.130154	0.255298	1	0.951645	0.506848	0.237096	0.794584	0.252153	0.260082	0.329954	0.00671978	0.153221	0.540537	0.310498		0	0	0.611543	1	0.163711	0.073106	0.419359	0.392238	0.280135	0.158196	0.177455	0.251517	0.140302	0.173868	0.145358	0.325418	0.126774	0.165638
0.0499175	0.761306	0.725053	0.0273196	0	0.248938	1	0.530026	0.191792	0.166852	0.87531	0.4342	0.0835599	0.106168	0.0282292	0.533198	0.0184344	0.0105894		0.303121	0	0	1	0.0496201	0.127531	0	0	0.186172	0.475358	0.424885	0.0414815	0	0	0	0	0.211613	0.348489
0.352175	0.114847	0.336352	0.306352	0.68681	0.840865	1	0.54601	0.717053	0.555055	0.167187	0.131723	0.137322	0.0684709	0.191243	0.112773	0.0790284	0.023715		0.011077	0.188481	0	0.0749383	1	0.751422	0.884991	0.443274	0.0949724	0	0	0	0.233951	0.20184	0	0	0.08967	0.0241308
0.600458	0.239233	0.675234	0.598512	0.775908	0.761394	1	0.119072	0.194855	0.272202	0.0660186	0.00484823	0.299129	0.817055	0.858589	0.848505	0.273291	0.100838		0.294803	0.760321	0.374879	0.120235	1	0.690464	0.788407	0.276853	0.357003	0.310219	0.735831	0	0	0.200939	0	0	0.205698	0.694493
0.594844	0.314579	0.551928	0	0	0	1	0.308524	0.0584976	0.150531	0.0769393	0.0213736	0	0	0.444777	0.0741431	0.0499813	0.118964		0.114061	0.00694979	0.285888	0.661565	1	0.343446	0.122605	0.139602	0.0801229	0.239175	0.309907	0.109937	0	0	0	0	0.0329656	0.418313
0.216236	0.0385871	0	0	0.0465532	0.130779	1	0.247188	0.0550119	0.0964885	0	0	0.0472758	0	0.0872741	0.0429898	0.0613703	0.0155226		0.13192	0.0219249	0	0.125	1	1	0.530619	0.0588017	0	0	0	0	0	0	0	0	0	0
0.124744	0.493755	0.910403	0.228753	0.544106	0.18936	1	0.908783	0.948624	0.704712	0.108366	0.0361659	0	0	0.120134	0.0855141	0	0.0146649		0.156273	0.441328	0.085433	0.0847519	1	0.670648	0.377725	0.191745	0.0387049	0.0573095	0	0	0	0	0	0	0	0.197008
0.643105	0.0908814	0.209533	0.428992	0.542617	0	0.735746	1	0.971244	0.523361	0	0	0	0	0	0.0871971	0.209747	0.45109		0.138669	0.210033	0.182685	0.341837	1	0.672831	0.412874	0.000929893	0.0195007	0.233856	0.120465	0	0.183873	0.178765	0	0	0	0.0948121
0.389353	0	0.069566	0.217738	0	0.0385495	0.383449	1	0.254269	0.366278	0	0	0	0	0.0754183	0.0346921	0.0228789	0.0830925		0.0372663	0	0	0.342647	1	0	0	0	0.0839803	0.242546	0.146778	0	0	0	0	0	0	0.403229
0	0	0	0	0	0	0.202499	1	0.963973	0	0	0	0	0	0	0.165614	0.331228	0.0152874		0.239007	0	0.891392	0.489071	1	0	0	0.442039	0.61257	0.429064	0	0	0	0	0	0	0.284568	0.217756
0	0	0	0	0	0	0	1	0.945834	0	0	0	0	0	0	0	0	0		0.063413	0	0	0.206842	1	0.778065	0	0	0	0	0	0	0	0	0	0	0.1868	0
0.367625	0.260517	0	0	0.502429	0	0.730443	1	0.644121	0	0	0	0	0	0	0	0	0.0366505		0.114042	0.0162392	0	0.23683	1	0.823299	0.954084	0.181124	0.00736422	0.307598	0	0	0	0.0664537	0	0.0612183	0.635428	0.709409
0.369279	0.877885	0.173383	0	0.0347013	0.418753	0.767357	1	0.197424	0.116074	0.187375	0.112963	0	0	0	0.369459	0.14451	0.316441		0.0874072	0.011739	0.347251	0.211291	1	0	0	0.0467207	0.933392	0.322122	0.580982	0	0	0	0.971696	0.795024	0	0.233205
0	0	0	0	0	0	0	1	0.0454545	0	0	0	0	0	0	0	0	0		0.0654368	0.0374216	0	0	1	0.101087	0	0	0.310181	0.118274	0	0	0	0	0	0	0.146982	0.861201
0	0	0	0	0	0	0	1	0.26689	0	0	0	0	0	0	0	0	0		0.0147644	0	0	0	1	0	0	0	0	0.0859495	0	0	0	0	0	0	0	0.222422
0.739019	0.101818	0.143431	0	0.285134	0.846808	0.504202	1	0.0683465	0.775955	0.084628	0	0	0	0	0	0	0.318829		0.49539	0.455072	0.292534	0	1	0.471365	0.36506	0.116957	0.462129	0.297261	0.392299	0.127169	0.0176279	0.00629852	0	0	0	0.578296
0.638923	0.254521	0.416715	0.384176	0.0672818	0.210573	0.73697	1	0.383693	0.158826	0.296956	0.0204036	0.0592362	0.0413837	0.2822	0.129193	0.324296	0.370332		0.767865	0	0	0.0782488	1	0.257867	0	0.318856	0.791566	0.458248	0.311749	0	0.504201	0	0	0	0	0.264553
0.763484	0.485099	0.559551	0.0976689	0.129209	0.0474975	0	1	0.729971	0.522865	0.55731	0.0444602	0	0	0	0.11718	0.0646295	0.700323		0.102894	0	0.0814883	0.844917	1	0	0	0.191633	0.267089	0.164646	0.0222744	0.0681076	0.0516357	0.0183064	0.0562809	0	0.0650648	0.0316276
0.084255	0.171034	0.313921	0.0810144	0.0685166	0	0.519487	1	0.0100462	0.19285	0.389987	0.0110688	0	0.292471	0.10238	0.169414	0.407559	0.196408		0.457874	0.0891995	0	0.84754	1	0.140118	0	0	0.597504	0.229549	0	0	0.114597	0.0150726	0.0377672	0	0	0.360029
0.437893	0.566945	0.439512	0.455643	0.669435	0.734436	0.793238	1	0.68534	0.575717	0.379214	0.177001	0.37074	0.735023	0.420298	0.023655	0.199208	0.0971555		0.37308	0	0	0	1	0	0	0	0.591355	0.613797	0	0	0	0	0	0	0	0.32221
0.241022	0.264106	0	0	0	0	0	1	0.880157	0.379237	0	0	0	0	0.0221167	0.694869	0.9973	0.344606		0.660418	0.272698	0	0.410682	1	0.19195	0.224374	0.248339	0.688662	0.773243	0.0832535	0.0518837	0.13311	0.00253129	0	0.0169007	0.0408435	0.114616
0.41785	0.163606	0.436282	0.571672	0.0464974	0.267627	0.639361	1	0.838525	0.521867	0.524825	0	0	0	0.424951	0	0.174683	0.466535		0.0202953	0	0	0.0135166	1	0	0	0	0.152549	0.356377	0.0706279	0	0.130527	0.0341584	0	0	0	0.0962124
0.470406	0.376001	0	0	0	0	0	1	0.410989	0	0	0	0	0	0	0	0	0.189897		0.216495	0.321867	0.156902	0.765759	1	0.150013	0.289491	0.121591	0.527789	0.493595	0.0778524	0	0.112879	0.254484	0.0959308	0.0691099	0	0.20233
0.242646	0	0	0.0326877	0	0	0	1	0.490561	0	0	0	0	0	0	0	0	0		0.240449	0.296044	0.133108	0.513048	1	0.492216	0.286617	0.254446	0.512397	0.367965	0	0.00537306	0.103732	0.422179	0.104003	0.0136086	0.0244719	0.141525
0.378679	0	0	0	0	0	0.42	1	0.793093	0.440766	0	0	0	0	0	0	0	0		0.0408122	0.0128531	0	0.26386	1	0.544398	0	0	0.00177624	0.820412	0	0	0	0.0152997	0	0	0	0.0332981
0.470505	0.97646	0.542693	0.567987	0.0389084	0	0.181818	1	0.1	0.0889825	0	0	0	0	0	0	0	0.0339958		0.25767	0.134566	0	0.694561	1	0.0862217	0.325322	0.0369871	0.0221749	0	0.281078	0.078842	0.183007	0.0312141	0	0.0149033	0	0.503802
0.122312	0.444518	0.38178	0.38178	0.546977	0.747432	0.747432	1	0.335732	0.262979	0.127591	0.106975	0.303097	0.303097	0.344604	0.39427	0.851348	0.499701		0.144213	0.112184	0	0.347484	1	0.278238	0.31252	0.0920126	0.103845	0.0819643	0	0	0	0.238367	0.160006	0.189502	0.0416397	0.0447645
0.0384128	0.0301658	0	0	0	0	0.163409	1	0.377329	0.466834	0.342021	0.342021	0.342021	0.171011	0.00524958	0	0.0319512	0.013418		0.174728	0	0.048248	0.125465	1	0.169754	0	0.274189	0.258545	0.217808	0.193866	0	0	0.0253942	0	0.243182	0.126529	0.272373
0.0460565	0.447518	0.426866	0.252639	0.447019	0.57408	0.504289	1	0.11175	0.304328	0.113833	0.188612	0	0	0.0324109	0.35711	0.25487	0.0806458		0.336457	0.320547	0.315088	0.647019	1	0.405408	0.193228	0	0.239153	0.434397	0.125568	0	0.216791	0.314146	0	0	0	0.281418
0	0.0464166	0.160668	0.0817364	0.0346668	0.608543	0.738462	1	0	0	0	0.182229	0.196466	0	0.29897	0	0.00472433	0.00255966		0.65228	0.33701	0.0960426	0.589066	1	0	0	0.0887119	0.221508	0.792535	0	0.194001	0.668302	0.00792063	0	0	0.0988271	0.783021
0.828679	0	0	0	0	0	0	1	0.72381	0	0	0	0	0	0.0527268	0.450104	0	0.0093578		0.129629	0	0	0.587644	1	0.247327	0	0.149285	0.0649368	0	0.0301819	0.11154	0.521721	0.0229297	0	0.105991	0.102425	0.0131708
0.080642	0.0960848	0.218363	0.349999	0.210418	0.505894	0.996981	1	0.56064	0.259447	0.402337	0.77979	0.528421	0.183868	0.229916	0.285392	0.282511	0.0550582		0.298493	0.0471527	0.0778755	0.457731	1	0.160496	0	0.225088	0.37672	0.413971	0.14599	0.0920585	0.178054	0.23104	0.0430013	0.284953	0.147137	0.0992451
0.461884	0.0659071	0.271856	0.58268	0.00833524	0.222855	0.0215531	1	0.5472	0	0	0	0	0.457891	0.314567	0.127028	0	0.552385		0.76966	0.831495	0.399791	0.236053	1	0	0.0327176	0.337055	0.344516	0.328802	0.961446	0.207486	0.192706	0.165932	0.653038	0.392257	0.177708	0.406466
0.131993	0.649869	0.0505661	0.10908	0.239664	0.0970318	0	1	0.168624	0.265677	0.0478157	0	0	0	0	0.450454	0	0.648909		0.416757	0.208454	0.12514	0.219656	1	0.556934	0.506303	0.0359583	0.191779	0.210541	0.0166545	0.133831	0.0818745	0	0.0248992	0.0553032	0.0791574	0.54892
0.136151	0.033873	0.0428778	0.700186	0.280046	0.0533998	0.431793	1	0.0725917	0.205097	0.0598319	0	0	0	0	0.427145	0.0875154	0.645321		0.237936	0.0721032	0.6458	0.452736	1	0	0.143198	0	0	0.171588	0	0.191827	0	0.0488828	0	0.161192	0	0.0700885
0.25672	0	0.0119861	0	0	0.160645	0	1	0.374397	0.417136	0	0	0	0	0	0.122631	0.141446	0.286405		0	0	0	0	1	0.0570652	0	0	0	0	0	0	0	0	0	0	0	0.0623202
0.584497	0	0.163416	0.0768234	0.434701	0.134906	0.901647	1	0	0.130701	0	0	0	0.191449	0.0526975	0	0	0.467386		0.627477	0.244323	0.742259	0.844265	1	0.30861	0.205609	0.278317	0.37866	0.19371	0.00648217	0.0551144	0.150947	0.218957	0.74694	0.792412	0.97268	0.598673
0.442951	0.176077	0.230806	0.0101098	0.0580641	0.146012	0.317976	1	0.476317	0.592968	0.0109587	0.114645	0.228215	0.15649	0.134487	0.977478	0.449609	0.754057		0.0287887	0.0467674	0.332228	0.843754	1	0.382965	0	0	0.362666	0.241881	0.0843626	0	0	0.275523	0.0472705	0.099601	0	0.0247158
0.167742	0.0178278	0.116529	0.543971	0.712787	0	0.505281	1	0.352913	0.0299201	0	0	0	0.280788	0.0441491	0	0	0.0620077		0.0560325	0.155397	0.17169	0.528341	1	0.274233	0.0179636	0.0540868	0.0818572	0.0974793	0.0866426	0.476266	0.186919	0.0978234	0.265076	0.103731	0.254721	0.0628186
0.212496	0.0184103	0.0270016	0.0307917	0	0.114481	0.320133	1	0.0158492	0.254744	0.0231519	0.303407	0	0	0	0	0.146288	0.261838		0.211851	0.481279	0.227452	0.486902	1	0.343775	0.299596	0.285904	0.256365	0.300491	0.208166	0.0121408	0.057117	0	0.153887	0.59467	0.177163	0.10574
0.388421	0.0132797	0.202567	0.301037	0.328704	0.797714	0.340689	1	0.00611452	0.400262	0.294274	0	0	0.0604161	0	0.177239	0.112443	0.118207		0.192446	0.390185	0.217184	0.288801	1	0.58725	0.0154849	0	0.487371	0.284366	0.53594	0.077201	0.212063	0	0.210449	0.686962	0.313472	0.0842504
0	0.185825	0.255153	0.0832648	0.536801	0	0.892857	1	0.261933	0.62751	0	0	0	0.270259	0.509923	0	0	0.448333		0.167274	0.727356	0	0	1	0.311111	0	0.206163	0.320647	0.648223	0	0	0	0	0	0	0	0.208651
0.592892	0.00400456	0.0513458	0.338023	0.459496	0.455346	0.748659	1	0.722145	0.326868	0.474714	0.420918	0.339321	0.0362348	0.040624	0.094275	0.185251	0.0944928		0.0433202	0.266575	0.0803815	0.602861	1	0.480371	0.0168991	0.0165404	0.119541	0.411593	0.0604975	0.217263	0.131368	0	0.448788	0.582918	0.204697	0.0694502
0.0888813	0.31142	0	0	0.135714	0.607807	0.665029	1	0.19277	0.438769	0.806005	0.625387	0.505488	0.268212	0.269979	0.202018	0.201944	0.523658		0.162935	0.134417	0	0.524915	1	0	0	0.186447	0.631168	0.477908	0	0	0	0	0.471349	0.707498	0.597862	0.120986
0.107911	0	0	0.495681	0.297409	0	0	1	0.14557	0.74623	0.231414	0	0.0451909	0.155219	0.345918	0	0.330965	0.473182		0.0805946	0.190458	0.779588	0.786571	1	0.592195	0.708607	0.213613	0.41556	0.20533	0.109445	0	0.0357098	0.103109	0.0793937	0.0245559	0.0789142	0.057712
0.712064	0.250365	0.513077	0.307188	0.0498376	0.134038	0.826141	1	0.87389	0.346516	0.899133	0.368703	0	0	0.226078	0.317993	0.161913	0.0158837		0.314349	0.910606	0.905757	0.812766	1	0.640644	0.398844	0.0963868	0.0691784	0.0342494	0.0529665	0.0706475	0.0841044	0.0523408	0.0196329	0.0207589	0.0033885	0
0.334065	0.0144005	0.0605962	0.67747	0.292966	0.507131	0.388408	1	0.742535	0.507902	0.972992	0.435334	0.619472	0.119686	0.0549919	0.0920937	0.0785123	0.138781		0.103875	0.116532	0.12922	0.466215	1	0.135593	0.164326	0.101078	0.0653624	0.207858	0.548544	0.484381	0.0775107	0.193777	0.0150715	0.0087078	0	0
0	0	0	0	0	0	0	0	1	0	0	0	0	0	0	0	0	0.158145		0	0	0	0.599433	1	0.75	0	0.102912	0.556119	0.0450681	0.0382756	0.146387	0.00886462	0	0	0	0	0.122167
0.022248	0.0990499	0	0	0	0	0	0	1	0.201459	0	0	0	0	0	0	0.133461	0.0846293		0.0224617	0.301634	0.684128	0.831247	1	0.352244	0.0855046	0.0918351	0.222306	0.139501	0.00339866	0.0283062	0.0469104	0.00209113	0	0	0	0.00628378
0	0	0	0	0	0	0	0.395557	1	0	0	0	0	0	0	0	0	0		0.0485787	0.299751	0.0993685	0.576425	1	0.710873	0.190908	0.187846	0.141553	0.761179	0.501845	0.0161965	0.798862	0.832634	0.0210221	0.462479	0.261975	0.0756879
0	0	0	0	0	0	0	0	1	0	0	0	0	0	0	0	0	0		0.614051	0.821119	0.714357	0.488799	1	0.870421	0.451983	0.153651	0.319617	0.0453841	0.411421	0.308588	0.236449	0	0.155835	0.150446	0.0307105	0.0489293
0	0	0	0	0	0	0	0	1	0	0	0	0	0	0	0	0	0		0.168551	0.43884	0.492282	0.736986	1	0.479003	0.0956569	0.115745	0.305935	0.330082	0.52725	0.0192294	0.129642	0.170012	0.136924	0.0709677	0.289936	0.433794
0.316668	0	0	0	0	0	0	0	1	0.581281	0	0	0	0	0	0	0	0.108162		0.741546	0.189865	0.238195	0.549757	1	0.557716	0.376508	0.0672425	0.287826	0	0.13763	0.068257	0.258352	0	0.190008	0.0884657	0	0.0221959
0.498863	0	0	0	0	0	0	0	1	0	0	0	0	0	0	0	0	0.484376		0.229187	0.68949	0.941979	0.709999	1	0.0538619	0.00558669	0.11068	0.733512	0.852472	0.665324	0.919936	0.948293	0.976891	0.236174	0.404498	0.194477	0.628811
0	0	0	0	0	0	0	0.235492	1	0	0	0	0	0	0	0	0	0		0.0423562	0	0	0.380091	1	0.475548	0.222641	0	0.306374	0.157898	0.812869	0	0	0	0	0.113307	0	0.253775
0	0	0	0	0	0	0	0	1	0	0	0	0	0	0	0	0	0		0.0018237	0.905458	0.765853	0.775225	1	0.0914181	0.516251	0.243218	0.0358657	0.0505023	0.0153982	0.27755	0.202373	0.166308	0.151568	0.0401731	0.0250602	0.158102
0	0	0	0	0	0	0	0	1	0	0	0	0	0	0	0	0	0		0.053385	0.405495	0	0	1	0.646853	0	0	0.048788	0.307641	0.0530403	0.139874	0.586317	0	0	0	0.544563	0.342654
0	0	0	0	0	0	0	0	1	0	0	0	0	0	0	0	0	0.426025		0.353488	0	0.257505	0.467283	1	0.411623	0.115414	0.148451	0.266106	0.0666514	0.0790168	0.0681709	0.157743	0.374665	0.34292	0.332458	0.0435996	0.0510916
0	0	0	0	0	0	0	0	1	0	0	0	0	0	0	0	0	0.249552		0.0300617	0	0	0.070711	1	0.540851	0.0859436	0.15787	0.214267	0.0631262	0.658566	0.168791	0	0.0618878	0	0	0	0.0209897
0	0	0	0	0	0	0	0	1	0.803331	0	0	0	0	0	0	0	0.502948		0.11687	0	0	0	1	0.0529561	0.0310822	0.00765662	0.0711514	0	0.0597349	0	0	0.520423	0	0	0	0.131346
0.0590491	0	0	0	0	0	0	0.453782	1	0	0	0	0	0	0	0	0.216389	0.199958		0.57457	0	0.24179	0.290975	1	0.354235	0.566281	0.145564	0.225224	0.227404	0.218027	0.0426989	0.202416	0.427323	0.345146	0.423437	0.0572231	0.0325048
0	0	0	0	0	0	0	0	1	0	0	0	0	0	0	0	0	0		0.207011	0.460474	0.0438547	0.690052	1	0.918946	0.0525707	0	0	0.263735	0.403714	0.417494	0.0707022	0	0.553357	0.976642	0.507839	0.828518
0.532614	0.0954087	0	0.559564	0.0403954	0.168875	0	0	1	0	0	0	0	0.475267	0	0	0	0.357323		0.148618	0	0	0	1	0.475572	0.134385	0.113843	0.107471	0.533604	0	0.121933	0	0	0	0	0.457453	0
0.673632	0	0	0.698443	0	0	0	0.217121	1	0	0	0	0	0.236226	0	0	0	0.0418278		0.0250757	0	0	0.745427	1	0.692066	0.00874273	0	0	0.004125	0.0315107	0.102733	0.0268993	0	0	0	0	0.0165705
0	0.371069	0	0	0	0	0.0752116	0.47704	1	0.165237	0	0	0	0	0	0	0	0.0491977		0.225316	0.403749	0.342021	0.550008	1	0.466882	0.406275	0.231017	0.323495	0.081704	0.464401	0.33051	0.519285	0.49452	0.761471	0.264287	0.107822	0.0187066
0.493764	0	0	0	0	0.72856	0	0	1	0	0	0	0	0.533728	0	0	0	0		0.167138	0.0321009	0.139097	0.0527531	1	0.2829	0.567717	0.757268	0.15583	0.203418	0.0519149	0	0	0.364323	0.168149	0	0.0471695	0
0	0	0	0	0	0	0.210073	0.630399	1	0	0	0	0	0	0	0	0	0.83238		0.39288	0.111369	0	0.164246	1	0.216796	0.0589254	0.0306328	0.00605055	0.156444	0.842064	0.356461	0.193064	0	0	0	0	0.889545
0	0	0	0.0459524	0	0	0	0.296936	1	0.106171	0	0	0	0	0	0	0	0		0.477185	0.162971	0.182851	0.0568256	1	0.061737	0.407262	0.0124142	0.031354	0.316553	0.643482	0.24596	0	0	0.0427063	0.203921	0.260004	0.913051
0.0480341	0.223356	0.501735	0.198081	0.485811	0.090444	0.361776	0.820213	1	0.633553	0.0289204	0	0.500043	0.361186	0.169533	0	0	0.00810291		0.0418924	0.366701	0.326381	0.877489	1	0	0	0.474204	0.64833	0.173386	0.238748	0.121717	0.329531	0.645402	0	0.118252	0.0223137	0.119832
0.502916	0	0	0.0409963	0.35315	0.693367	0	0	1	0	0	0	0	0	0	0	0	0.295969		0.0468729	0.654241	0.461993	0.585598	0.90026	1	0.578723	0.306351	0.348929	0.0830329	0.142655	0.352408	0.0278518	0	0.0638567	0.0130616	0.0287784	0.118744
0.111685	0	0	0	0	0	0	0	1	0	0	0	0	0.110293	0	0	0.284721	0.351168		0.674421	0.057317	0.134955	0.687119	0.983541	1	0.397194	0.0157502	0.109203	0.20202	0	0	0.219674	0.258294	0.448427	0.475932	0.0460662	0.0955918
0.608702	0.133207	0	0	0	0	0	0	1	0	0	0	0	0	0	0.0301869	0.340519	0.0540716		0.0162336	0.0587283	0	0.147177	0.389188	1	0.720569	0.0306829	0.236349	0.352499	0.381266	0	0.336562	0	0	0	0	0.0516075
0.00361029	0	0	0	0	0	0	0.227305	1	0	0	0	0	0	0	0	0	0.0038117		0.0148141	0.41382	0	0.232492	0.896375	1	0.296694	0.242838	0.040473	0	0	0.280687	0.295176	0.241032	0	0	0.0268214	0.016129
0.630372	0	0	0	0	0	0	0.228084	1	0	0	0	0	0	0	0	0	0.29888		0.0897513	0	0.196643	0.305038	0	1	0.898561	0.670295	0.126144	0.422625	0.385621	0.197161	0	0.122731	0.0782772	0	0.0112496	0.111356
0.0805605	0	0.239	0.105502	0	0	0.312352	0.196444	1	0	0	0	0	0.178719	0	0.0656446	0	0.0127172		0.0939716	0	0.108186	0.236803	0.241771	1	0.916043	0.544124	0.0535384	0	0	0	0	0	0.159321	0.716944	0.089618	0.726857
0.264373	0	0	0	0	0	0	0	1	0	0	0	0	0	0	0	0	0.265852		0.0398107	0.701574	0	0	0	1	0.136364	0.0868456	0.200413	0	0	0	0	0	0	0	0	0
0.0285391	0	0	0	0	0	0	0	1	0	0	0	0	0	0	0	0	0.164298		0.176865	0.0207171	0.132053	0.401935	0.678352	1	0.374274	0.0626856	0.244783	0.469344	0.0231495	0.610973	0.839929	0	0	0	0	0.0132615
0.242557	0.217931	0.0717125	0	0.175176	0.173374	0	0	1	0.757576	0	0	0	0.995294	0	0	0	0.766343		0.0801827	0.0828712	0	0.100891	0	1	0.562959	0.476871	0.230799	0.0145567	0	0	0.323353	0.103524	0	0	0.182315	0.0221133
0.130025	0.484857	0.63312	0.545274	0.501189	0.282704	0.141352	0.398386	1	0.550505	0.0764115	0.513017	0.636399	0.608725	0.301023	0.358032	0.234187	0.0596448		0.693833	0.126185	0.0440703	0.73574	0.600628	1	0.910803	0.325228	0.86627	0.592638	0.0774036	0	0	0.00581772	0	0	0	0.846194
0.346232	0	0	0.10143	0	0	0.143506	0.21532	1	0.191198	0	0	0	0	0	0	0	0.0295282		0.374575	0.145649	0.463168	0.276732	0.503838	1	0.877459	0.510129	0.28973	0.393184	0.100185	0.0900062	0.264552	0.0547071	0	0	0.177114	0.172636
0.694788	0	0	0.681472	0	0	0.675917	0.165861	1	0	0	0	0	0.472287	0	0	0	0.0435143		0.85812	0	0	0.127524	0.971604	1	0	0.269359	0.743198	0.128249	0.599056	0.0788232	0	0.392977	0.755868	0.239702	0.545951	0.557007
0.135331	0	0.0569199	0.0113128	0	0.0899746	0.0399392	0.162847	1	0.416565	0	0	0.00800172	0	0	0	0	0.175871		0.164689	0.0359631	0	0.266643	0.528848	1	0	0	0.0796554	0.636876	0.798374	0	0	0	0	0	0.0457518	0.684417
0.00406616	0.101426	0.110381	0	0	0.110885	0.307328	0.225014	1	0.142073	0.0436241	0.191955	0.00726666	0	0.0639282	0.281906	0.396677	0.116667		0.393154	0.491756	0.596477	0.495999	0.742047	1	0.739684	0.38236	0.618633	0.531883	0	0.0379977	0	0.0835565	0.0620671	0	0	0.348028
0.375614	0.519025	0.386232	0.42932	0.403664	0.300068	0.0720288	0.0309945	1	0.750176	0.144839	0.106669	0.153089	0.488774	0.387028	0.0607262	0.259702	0.228961		0.971216	0.176614	0.206033	0.219006	0.315669	1	0.793138	0.52017	0.362655	0.458198	0.274747	0.0716107	0.698362	0.851344	0.100646	0.147878	0.0493759	0.971396
0.0180326	0.163343	0.0831167	0.0046519	0.0230201	0.072428	0.0266912	0.347095	1	0.273865	0	0	0	0.0319482	0.0745457	0.00392346	0.020795	0.0626215		0.259033	0.0280695	0	0	0.618028	1	0.551384	0.288816	0.00587883	0.00366999	0	0	0.0383588	0.00846038	0	0	0	0.00479496
0.0739704	0.035393	0.106179	0.320818	0	0.0695002	0.374594	0.378523	1	0.039053	0	0	0	0.169441	0.0374673	0.128506	0.701258	0.114356		0.146506	0.128263	0.267328	0	0.346612	1	0.780776	0	0.796166	0.692447	0	0.145163	0.202801	0.0137321	0	0	0.099164	0.148633
0.274299	0	0.703631	0.12763	0.128437	0.306063	0.261426	0	1	0.380507	0	0	0	0.0614927	0.197195	0.162059	0.283092	0.271774		0.419883	0.296143	0.150964	0.518786	0.198581	1	0.343188	0	0.73183	0.161292	0.372815	0	0	0.0526469	0	0	0	0.623433
0.140041	0	0.782202	0.786354	0.687272	0.687272	0.586754	0.466007	1	0.177937	0	0	0.878744	0.781491	0.633821	0.181684	0.324277	0.240182		0.58857	0	0.202644	0.632155	0.744289	1	0.910367	0.0594953	0.585866	0.159219	0.160011	0.0220688	0.337541	0.731767	0.95613	0.324533	0.0699223	0.111842
0.0825508	0.024693	0.0138971	0.175949	0.416648	0.19189	0.165591	0.255701	1	0.453917	0.044683	0.12842	0.00784954	0.288549	0.553503	0.309468	0.0536029	0.0811139		0.519989	0.609916	0.737659	0.613649	0.793375	1	0.993026	0.16453	0.0596997	0.351291	0.455546	0.317836	0.424899	0.353775	0.0911931	0.258626	0.0368821	0.0781999
0.0226327	0	0.529814	0.143384	0	0	0.0408192	0.177314	1	0.0576616	0	0	0	0	0	0	0	0.0111611		0.597842	0.777855	0.332084	0.827261	0.329537	1	0.769184	0	0.778371	0.318986	0.1844	0	0.341201	0.167837	0	0	0	0.673329
0.434989	0.498065	0.764585	0.361848	0.252907	0.398603	0.868568	0.582394	1	0.216788	0	0.290998	0.575564	0.333476	0.18035	0	0.108877	0.22856		0.209318	0	0	0	0.803738	1	0.416054	0.119542	0.0150782	0.144108	0	0	0	0.0592783	0	0	0	0.113724
0.55574	0	0.173766	0.102169	0	0	0	0.0252337	1	0.330782	0.0991953	0	0	0	0	0	0	0.44748		0.0994679	0.273394	0.477593	0.661476	0.772438	1	0.95563	0.531059	0.210334	0.0394009	0	0	0.124123	0.156241	0.231959	0.0842465	0	0.00539075
0.190216	0.061108	0.158622	0.229584	0.14178	0.0638012	0.304465	0.430968	1	0.194303	0	0	0.129883	0.494699	0.486321	0.734291	0.320232	0.0849605		0.0795525	0.36016	0.734878	0.285508	0.839291	1	0.876065	0.15807	0.355422	0.296844	0.036147	0	0	0	0	0	0.172993	0.0593012
0.10032	0.652668	0.364438	0.0792547	0.139658	0.0542797	0.364133	0.24001	1	0.326581	0	0	0	0.0512492	0.0574455	0	0.179157	0.0633713		0.0572943	0.0161462	0	0.48505	0.785382	1	0.741723	0.274277	0	0	0.00665558	0.161022	0	0	0.113192	0	0	0.087394
0.0743834	0.0574691	0.0540359	0.11269	0.0538433	0	0.0053037	0.170818	1	0.563885	0.0614864	0	0	0	0	0.0206588	0.0282642	0.00600305		0.0587374	0.306173	0.401335	0.435199	0.534791	1	0.925967	0.24018	0.180365	0.339725	0	0.0906599	0.101423	0.0503187	0	0.020727	0.25795	0.0352266
0.00414365	0.0278082	0.0599398	0.052173	0.0362616	0.0245102	0.0672169	0.305879	1	0.0939052	0.0612513	0.0300442	0.0381512	0.0264939	0	0.0077863	0.046396	0.040212		0.44402	0.0753927	0.725859	0.424981	0.811677	1	0.419703	0.262368	0.484407	0.542244	0.85202	0.731689	0.0954061	0	0.209069	0.0602494	0.781929	0.757231
0.155099	0.0354597	0.481166	0.143705	0.0784827	0.538994	0.374621	0.299514	1	0.35665	0.645681	0.46244	0.169537	0.78768	0.851553	0.490258	0.043711	0.469172		0.007739	0.110926	0.310887	0.0228252	0.241004	1	0.696922	0.553473	0.17613	0.0775576	0.566411	0.320925	0.201713	0.0319649	0.00865833	0	0	0.0687696
0.0585771	0	0.388964	0.232002	0	0	0	0	1	0.693326	0.234478	0.428177	0.160566	0	0	0.12466	0.0280298	0.594524		0.910047	0.682449	0.728815	0.238282	0.259145	1	0.744103	0.312292	0.489949	0.214554	0.0925889	0.268153	0.0672138	0.103704	0.115973	0.156457	0.335352	0.0290018
0.060534	0	0.0202151	0.0846298	0.12387	0.154197	0.22869	0.273047	1	0.147829	0	0	0	0	0.0458718	0.0243839	0.199993	0.185339		0	0.627214	0	0	0.0667447	1	0.543967	0.199907	0.281625	0.0499612	0.147506	0.0564256	0.32031	0.0373016	0.416471	0.0252917	0	0.312846
0.718917	0.232772	0.414878	0.225054	0.00337043	0.0701326	0.491122	0.828665	1	0.681411	0.442924	0.0590085	0.0696828	0.112283	0.212503	0.201403	0.387795	0.204606		0.14466	0.323274	0.174304	0.0915096	0.566172	1	0.33178	0.20226	0.237528	0.262346	0.280387	0.135196	0.0577988	0.00722058	0.103343	0.14729	0.0320654	0.100889
0.257006	0.375037	0.513258	0.0574126	0.188598	0.13227	0.103315	0.378615	1	0.485269	0.1153	0	0.0922698	0	0.0705391	0	0	0.37953		0.676447	0.323306	0	0.197013	0.812351	1	0.831268	0.359676	0.334739	0.12426	0.386796	0.528697	0.207416	0.108813	0.22891	0.015212	0.00646227	0.0469841
0.128517	0.00473899	0.341808	0.0699649	0	0.0173471	0	0.216972	1	0.181425	0	0.219163	0.321446	0	0.238444	0.0522711	0.319129	0.275846		0.265906	0	0.0291999	0	0.166667	1	0.168066	0.297626	0.517358	0.300766	0.329491	0	0.480376	0.12636	0.366518	0.151737	0.0191908	0.473209
0.0933349	0.00238629	0.025157	0.117098	0.0363376	0.111157	0.0204	0.0764624	1	0.235722	0.0756482	0.00759639	0.0779789	0.0873363	0.0304823	0.0977263	0.0562117	0.121209		0	0.12424	0.0302064	0	0.409399	1	0.526245	0.0672785	0.0696667	0.571674	0.535113	0.0458934	0.0392175	0.0171912	0.160944	0.505285	0.0631152	0.0703559
0.0359582	0.0230552	0.167496	0.015478	0	0	0.00984107	0.0557268	1	0.165879	0.0300331	0	0	0	0	0	0	0.0807914		0.62262	0.679359	0.977571	0.385251	0.525767	1	0.849998	0.625859	0.133135	0.180962	0.270665	0.179439	0.00765535	0.148835	0.144906	0.0619603	0	0.637007
0	0.894727	0.628709	0.282357	0	0	0	0.0166383	1	0.0457555	0	0	0	0.133951	0.0723786	0.0895233	0.498592	0.132628		0	0	0.383581	0.346187	0.795919	1	0.640643	0.653354	0.477633	0.551697	0.795668	0.944046	0.454752	0.338178	0.0846822	0.0780267	0.964522	0.276469
0.00626858	0	0.0374094	0	0.0603628	0	0	0.0125589	1	0.162355	0	0	0	0	0	0.0774821	0	0.105255		0.120865	0	0.0314344	0.0857156	0.51311	1	0.272074	0.464318	0.098135	0.0712944	0.0448591	0.0294897	0	0	0.454936	0.309035	0.640453	0.425663
0.0321085	0.029374	0.00836437	0.0516304	0	0.269067	0.351087	0.167816	1	0.220471	0.0696177	0	0	0	0.00720943	0	0.0316199	0.0561062		0.529343	0	0	0	0.961187	1	0.332836	0.407613	0.367441	0.911541	0.074289	0.202909	0.144381	0	0	0	0	0.137275
0	0.685231	0.335208	0.65042	0	0	0	0.616879	1	0.645383	0.386428	0.940869	0.940869	0.909937	0.38027	0	0.0606985	0.251163		0.520108	0.0711148	0	0	0.329441	1	0.129133	0.533819	0.128533	0.411465	0.343074	0	0	0	0.485014	0.0923836	0	0.348961
0	0.0495152	0.0996599	0.0643669	0	0	0	0.368556	1	0.140912	0	0	0	0.170694	0.060658	0	0.0178674	0.0967179		0.0125751	0	0.519139	0.762834	0.657999	1	0.086042	0.0144832	0.197265	0.214055	0.197904	0.135933	0.0476959	0.0538139	0.223535	0.0670604	0.114995	0.0383318
0.0632551	0.264849	0.27343	0.316357	0.209116	0.24457	0.24457	0.330194	1	0.193998	0	0.0680929	0.102139	0.0638371	0	0.107446	0.134416	0.0737747		0.0162404	0	0	0	0.775337	1	0.305581	0	0.497623	0.531339	0.957084	0.891799	0.38474	0	0	0	0.0330773	0
0.177844	0.0299857	0.199694	0.528807	0.0557211	0	0	0	1	0.37475	0	0	0	0	0	0	0	0.297053		0.0733568	0.188529	0	0.270963	0.161849	1	0.219498	0.111798	0.592607	0.235387	0.367724	0.337369	0.140625	0.131112	0	0	0.122826	0.197629
0.0496596	0.0398071	0	0	0	0	0	0.0634304	1	0.243516	0	0	0	0	0	0	0.0289257	0.0739181		0.183596	0.632607	0.531238	0.407945	0.192964	1	0.957104	0.734557	0.116828	0.130732	0.35845	0.596505	0.383886	0.207967	0.0240082	0	0.0257768	0
0.0161956	0	0.187076	0.0955881	0	0	0.0564184	0.210365	1	0.172199	0.199425	0.0168742	0	0	0	0	0.0216152	0.0346304		0.320096	0	0.30197	0.0361883	0.0179421	1	0.693527	0.585008	0.50824	0.656974	0.641154	0.134105	0.313318	0.0631296	0	0.320845	0	0.391262
0.0109047	0	0.108703	0.148673	0	0	0.0288184	0.0952781	1	0.204968	0	0	0	0	0	0.163752	0.119576	0.0539574		0.448786	0.488933	0.253033	0.204913	0.75962	1	0.332277	0.45979	0.321272	0.293564	0.188124	0.574465	0.628986	0.389811	0.078392	0.117245	0.560354	0.22852
0.10392	0	0.118283	0.0495817	0.00801309	0	0	0.185143	1	0.234486	0	0	0	0	0.112389	0	0.18134	0.307463		0.0385653	0	0.961059	0.293274	0.150075	1	0.618452	0.0339917	0.0275136	0.179323	0.144941	0.0273811	0.182759	0.0441714	0.562167	0.225986	0.0121627	0
0	0	0	0	0	0	0	0	1	0	0	0	0	0	0.246236	0	0	0.344366		0.0926959	0.0860008	0.144427	0.046299	0.240417	1	0.767409	0.285143	0.171743	0.105678	0.40038	0.413391	0.0204256	0.0216124	0.389267	0.672147	0.110835	0.236537
0.26155	0	0	0.332029	0.0751562	0	0	0.0826137	1	0.130449	0	0	0	0	0	0	0.0728938	0.259368		0.440311	0.0539051	0.0747656	0.215394	0.40123	1	0.767396	0.65217	0.452047	0.137554	0.0205767	0	0	0.0199349	0	0.0053722	0.252989	0.0117899
0.0336983	0.0775122	0	0	0	0	0	0.0935619	1	0.526868	0	0	0	0	0	0	0	0.0230723		0.281033	0.633731	0.200856	0.0130638	0.18898	1	0.0834597	0	0.235341	0.297553	0	0.326509	0.695026	0	0.0501285	0.724088	0.0985964	0.335131
0.336591	0.173894	0.410463	0.666248	0.237259	0.632692	0.207932	0.394485	1	0.0921318	0.206033	0.125329	0	0	0.0769028	0	0	0.156267		0	0	0.180884	0.078296	0.0719888	1	0.21104	0	0.0955226	0.0517181	0.0955424	0.0173599	0.0422971	0.368376	0	0.167626	0.0160879	0.0824138
0.048933	0.0472999	0.0915859	0.237631	0	0	0	0.0389319	1	0.304322	0	0.264924	0.425572	0.654498	0.134003	0.0968108	0.176207	0.181072		0	0	0.258187	0.100224	0.00304196	1	0.253199	0.0933015	0.255949	0	0.0764682	0.230228	0.145917	0.596392	0.412119	0.0204686	0.967089	0.0145827
0.049678	0.0442668	0.106805	0.123995	0.0867156	0	0.0695318	0.042805	1	0.153924	0.0518043	0.0663875	0.200543	0.176141	0.0702411	0.070847	0.0975786	0.0550178		0.253418	0.910059	0.110651	0	0	0.114525	1	0.168124	0.0370985	0.136799	0	0.0439175	0.736802	0.175606	0	0	0.226232	0.030763
0	0	0	0	0	0	0.0614832	0.73534	1	0.278893	0	0	0	0	0.0711676	0	0.292429	0.0603078		0.0154645	0	0	0	0.260302	0.47412	1	0.498541	0.0172965	0.0290622	0.0198649	0	0.726562	0	0	0	0.0383372	0.0534749
0	0	0	0	0	0	0	0.130099	1	0.0750633	0	0	0	0	0	0	0	0.00605714		0.203196	0	0	0.949288	0	0	1	0.0195869	0	0.564086	0	0	0	0	0.328397	0.223907	0	0.0876814
0.04047	0	0.0946386	0.246643	0	0	0	0.150928	1	0.248242	0	0	0	0.0887614	0.0578531	0.0863363	0.0456262	0.145786		0.00611216	0	0.0251687	0.371212	0.766544	0.649372	1	0.00452571	0.156829	0.0414703	0.0424674	0.18011	0.200122	0.218955	0.0257833	0.00832999	0.0121879	0.0634611
0	0	0.272602	0	0	0	0	0.088063	1	0.30898	0	0	0	0	0	0.033743	0.231761	0.0376071		0.867515	0	0	0.904845	0	0	1	0.169231	0.4506	0.0530724	0	0	0.511939	0	0	0	0	0.910544
0.00965966	0	0.20257	0.0625859	0	0	0	0.146409	1	0.0272791	0	0	0.0272366	0.136183	0.217474	0.163636	0.358716	0.0380283		0.225174	0	0.187544	0.785656	0	0.138898	1	0	0	0	0.277561	0	0	0	0	0	0.0737603	0.814155
0.0481537	0.0646393	0.419054	0.0663462	0	0	0	0.179476	1	0.36413	0.306234	0.0349996	0	0	0.0254866	0.152266	0.0104904	0.0590402		0.411093	0.0513822	0.307087	0.509429	0.322952	0.237718	1	0.0237832	0.040897	0.269071	0	0	0	0	0	0	0.190465	0.174692
0.00590861	0	0.0184735	0.361043	0.645536	0.754608	0	0.296406	1	0.0844505	0.213113	0.0945191	0.0513104	0.107085	0	0	0.272899	0.0245107		0.0281963	0	0	0.41267	0	0	1	0.205668	0.296625	0	0.380753	0	0	0	0	0	0	0.0906945
0.0451178	0	0.609215	0.19783	0	0	0	0	1	0.29813	0.0443573	0.337372	0	0	0	0	0	0.0438403		0.0298135	0.123744	0.355809	0.565833	0.773095	0.765463	1	0.692605	0.358486	0.0296845	0.059245	0	0.230214	0.153744	0.115854	0.106256	0.0165192	0.0816715
0.119122	0.0584219	0	0.216686	0	0	0	0.0384376	1	0	0	0	0	0.273944	0	0.256528	0	0.238466		0.108658	0	0	0.385726	0.148137	0.230402	1	0	0	0	0	0	0	0	0	0	0	0.0595771
0.0147468	0	0.208429	0.088161	0	0	0	0.349072	1	0.124512	0.0602671	0.00381136	0.317416	0.339719	0.079354	0.0722637	0.2743	0.145269		0.0816512	0.00999883	0.143694	0.250595	0	0.673488	1	0.303994	0.335989	0.322569	0.0390431	0	0	0.576547	0.166429	0	0.00583441	0.313366
0.0286672	0.0291245	0.0361453	0.0608158	0.0673181	0.134636	0.0128035	0.488724	1	0.0906607	0.00757123	0.00536341	0.0719591	0.0395283	0.0138369	0.0485728	0	0.0187615		0	0	0	0.160512	0	0	1	0.1008	0	0	0	0	0	0	0	0	0	0.154278
0	0	0	0	0	0	0	0.464998	1	0.0765705	0.745366	0.0942755	0	0	0	0	0	0		0.359772	0.149438	0	0.305377	0	0	1	0.10035	0.348971	0.151942	0.0794132	0	0	0.0103436	0.249687	0	0	0.415775
0.507476	0.0489497	0.23449	0.0584061	0.201097	0	0.444068	0.833078	1	0.433273	0	0	0	0.0613669	0.0675981	0	0.146375	0.444025		0.52751	0.302107	0.8061	0.726633	0.838015	0.167453	1	0.289052	0.105283	0.122861	0.503385	0.307941	0.498513	0.574837	0.615295	0.358302	0.326498	0.0893429
0.0147965	0.0019578	0.07651	0	0.0308122	0.0821659	0.0224618	0.0901615	1	0.305363	0	0	0	0	0.0206049	0.0667516	0.0991782	0.0288842		0.625667	0.30504	0	0.737318	0.243403	0.0396367	1	0.0884715	0.44746	0.198063	0.142582	0	0	0.0744816	0	0	0	0.882455
0.0354439	0	0	0	0	0	0	0.0690405	1	0.267591	0.00601871	0	0	0	0	0	0.0308008	0.00705176		0.206683	0.0723233	0	0.273707	0.14062	0	1	0.131429	0.197778	0.164928	0.167087	0.518978	0	0.17039	0	0	0	0.378234
0.0823448	0.00827717	0.144066	0.0570821	0	0	0	0	1	0.579798	0	0	0	0	0	0.148694	0	0.046509		0.0481217	0.0689229	0.0993111	0	0.00518863	0.764139	1	0.0230133	0.122958	0.0622196	0.126012	0.0540007	0.00924859	0.00535848	0.0186803	0	0	0.033399
0.0578519	0	0	0	0	0.292621	0.0053578	0.0263885	1	0.615756	0.169161	0	0	0	0	0	0.372812	0.0934859		0.144796	0.235499	0.751031	0.209329	0.400996	0.872581	1	0	0.166363	0.495643	0.240176	0.163772	0.0693618	0.00888334	0.0437645	0	0.015916	0.0951253
0.273604	0.017218	0.0187181	0.119172	0.0558618	0	0.0622255	0.382237	1	0.238872	0	0	0	0.136248	0.0194641	0	0.163078	0		0.179034	0.298139	0.221142	0.0418329	0.121177	0.54299	1	0.00278406	0.551359	0.199288	0.266393	0	0	0.0021594	0	0	0	0.279918
0.0389379	0	0.069901	0.140656	0	0	0	0.0898183	1	0.223871	0	0	0.0838338	0.305242	0.0950473	0.16751	0.37265	0.340069		0.207982	0.0890379	0	0.32697	0.789852	0.97379	1	0	0.0110115	0.143468	0	0	0	0	0	0	0	0.060645
0.127453	0.109871	0.256223	0.0605363	0	0	0	0.138213	1	0.123987	0	0	0	0	0.0590718	0	0.0999168	0.329518		0.0883614	0	0	0	0	0.0985747	1	0.428324	0.0136629	0.210027	0	0.0303716	0.54873	0.162296	0	0	0	0.265732
0.112167	0	0	0	0	0.325131	0	0	1	0.594786	0	0	0	0	0.169487	0.380063	0.375971	0.47984		0.606787	0	0	0.263036	0	0.757984	1	0.152301	0.562592	0.345003	0	0	0	0.067345	0	0.124705	0	0.141832
0.274781	0.172363	0.172303	0	0.161637	0.161637	0.0154253	0.258795	1	0.30395	0.429048	0	0	0	0	0	0.020165	0.097936		0.118125	0	0	0	0.643267	0	1	0.151332	0.862705	0.0852676	0	0	0	0.0470374	0	0	0	0
0.0628588	0.191325	0.228239	0.0383293	0	0	0.0351208	0.137185	1	0.257631	0.0535766	0	0	0	0	0.0046433	0.0637843	0.030248		0.790469	0.217239	0.115675	0.20007	0.0394217	0.718049	1	0.0238248	0.825962	0.494002	0.233497	0.0940474	0	0.00636067	0	0	0	0.668152
0	0	0.0454724	0.0661956	0	0	0	0.105916	1	0.148356	0	0	0	0.0505554	0.0306457	0	0.028298	0.0407316		0.141411	0	0.104617	0.0727618	0.533808	0.563398	1	0.0511648	0.242779	0.0397746	0	0.127506	0	0.0169371	0	0	0.273024	0.00840085
0.0107572	0	0.14349	0.0825605	0	0	0.124336	0.0516481	1	0.112848	0	0	0	0.131239	0.277231	0.0992286	0.0688977	0.0978245		0.101362	0	0	0	0	0.181818	1	0.723318	0.0882495	0.186897	0.581896	0.0574162	0	0.0218867	0	0	0	0.0706528
0.0106868	0.00838589	0.128098	0.201909	0.0824504	0.0250921	0.0916909	0.286218	1	0.0965006	0.153011	0.0187541	0.00780929	0.0860054	0.0182679	0.0556006	0.0928998	0.0269225		0.471578	0.837845	0.356055	0.049815	0.430384	0.965706	1	0.31126	0.942672	0.932258	0.239663	0.0174055	0.22313	0.0318631	0	0.121651	0.288278	0.147658
0	0.0439388	0.0408155	0.0870835	0.00866534	0.00455298	0	0.320332	1	0.227702	0.112111	0	0	0	0	0	0	0.0213155		0.221592	0.257006	0.0115927	0.376098	0.23671	0.054113	1	0.0712583	0.0452346	0.0982214	0.157929	0.030787	0.0637496	0.00912133	0.0492736	0.00697041	0	0.484507
0.00874545	0	0.00549064	0.0374032	0	0	0	0.128849	1	0.164996	0	0	0	0	0	0	0	0.00751232		0.285073	0.206267	0.341207	0.244632	0.61856	0.287318	1	0.201813	0.180015	0.202027	0.276583	0.0789767	0.311298	0.499049	0.384624	0.189067	0.0642359	0.0900121
0.00577389	0.0089415	0.0244532	0.134472	0	0	0.344356	0.470813	1	0.19563	0.0827078	0.0179332	0	0	0.0702554	0.0229589	0.0560681	0.0415707		0.171712	0.0462517	0	0.53133	0.560257	0.118011	1	0.0987515	0.269222	0.401425	0.345781	0.113566	0.316065	0.0153534	0	0	0.0423275	0.562201
0.0209654	0	0.110118	0.0610738	0.208619	0.292066	0.305463	0.521367	1	0.282584	0	0	0	0	0.166472	0	0.350292	0.117897		0.0449983	0.149927	0.138036	0	0.0796675	0.676855	1	0.00504966	0.179197	0	0.0723513	0	0	0.017711	0	0	0	0.0456216
0	0	0.738256	0.270234	0	0	0	0.0431207	1	0.395811	0.146493	0.0370574	0	0	0.142292	0	0	0.0987326		0.683652	0	0	0.564609	0	0	1	0.132106	0.201823	0.154724	0	0	0	0	0	0	0	0.788479
0.0233731	0	0.32104	0.1357	0	0	0	0.0135446	1	0.289387	0	0	0	0	0	0	0	0.181686		0.132644	0	0	0	0	0.23596	1	0.454223	0.711623	0.645982	0	0	0	0.0250838	0	0	0	0.0368532
0.264484	0.136946	0.168506	0.136019	0.287544	0.127655	0.624156	0.675961	1	0.761815	0.3034	0.0959291	0	0.320025	0.195667	0.0123668	0.263951	0.486164		0.0694412	0.122176	0.645803	0.704298	0.953812	0.870872	1	0.871216	0.544176	0.307945	0.520128	0.8739	0.664043	0.438892	0.592122	0.208589	0.278899	0.34546
0.0828215	0.015389	0.199215	0.135406	0	0	0.375548	0.890193	1	0.504802	0.297846	0	0	0.348334	0.139978	0	0.358379	0.379544		0.271169	0	0	0	0	0.0444464	1	0.886781	0.711164	0.406637	0	0	0	0	0	0	0	0.15794
0.140256	0.0173995	0.0298563	0.0424793	0	0.0217551	0.0988427	0.402385	1	0.8286	0.0204643	0	0	0	0.0462841	0.0296651	0.0828677	0.175091		0.0280409	0.074808	0.0210004	0.0822345	0.543078	0.522573	1	0.764643	0.406608	0.359514	0	0.0848133	0.166756	0.404007	0.473786	0.289726	0.0399345	0.0265863
0.474837	0.186037	0.313253	0.236082	0.317235	0.108028	0.427546	0.716585	1	0.86353	0.369815	0.157105	0	0.127376	0.164898	0	0.0701901	0.261213		0.183261	0.819263	0.601352	0.713902	0.534807	0.670778	1	0.808056	0.655998	0.813411	0.362973	0.502199	0.305516	0.673685	0.250415	0.556957	0.241574	0.196187
0.370847	0.0636797	0.157091	0.0426558	0	0	0.289948	0.406735	1	0.421544	0.0989086	0	0	0.00973555	0.0557582	0.00188408	0.0787533	0.143131		0.0556355	0.217416	0.461315	0.328074	0.581438	0.991654	1	0.402755	0.240245	0.00745892	0	0.0238178	0.0766168	0	0	0.0423468	0.0195594	0.0154995
0.0263869	0.161879	0.0343609	0	0	0.0688796	0.00998281	0.502996	1	0.140037	0	0	0	0	0	0.125212	0.0440741	0.136741		0.0412193	0.0851054	0.390636	0.2619	0.448728	0.912239	1	0.957678	0.269648	0.0599086	0	0	0	0	0	0	0	0.0448443
0.353391	0.126502	0.0427799	0.138282	0.050336	0.219122	0.614635	0.586824	1	0.70623	0.0700039	0	0	0	0	0	0.362287	0.245215		0.154806	0.0437709	0.0347506	0.0876293	0.166267	0.826135	1	0.653609	0.164741	0.197955	0	0	0	0	0.0463584	0.173502	0.0115417	0.135964
0.0811897	0.00462982	0.0296564	0	0	0	0	0.0912823	1	0.536274	0	0	0	0	0.463709	0	0	0.429858		0.174919	0	0.11141	0.103727	0.0761734	0.900232	1	0.556918	0.613097	0	0	0.0509031	0	0	0	0.354469	0.33816	0.192536
0.282786	0.0439184	0.0837843	0	0	0.00821928	0.0183703	0.10119	1	0.359102	0.0381612	0.13747	0	0.0607489	0	0.0488437	0.0465934	0.423545		0.148072	0.00471585	0.389606	0.285714	0.386441	0.764018	1	0.18286	0.151779	0.0542002	0.718239	0.863462	0.348206	0.517686	0.842317	0.0873213	0.263625	0.552307
0.433226	0	0.0892157	0	0	0	0	0	1	0.620687	0.116334	0	0	0	0	0.288045	0.205386	0.451652		0	0.0387039	0.433454	0.221944	0	0	1	0.211268	0.529352	0.0814371	0.118206	0.879585	0.409139	0.661479	0.119971	0.41474	0	0.524377
0.538836	0.416305	0.200476	0.0966202	0	0.0231217	0.0088006	0	1	0.4808	0.071034	0	0	0.0190197	0	0.0449075	0.0124114	0.153633		0.0596347	0.465267	0	0.168307	0.114962	0.639824	1	0.434687	0.462744	0.341954	0.225081	0.744688	0.353668	0.348089	0.333718	0	0.0748286	0.0430612
0.251908	0.109526	0.190517	0	0	0	0.0499355	0.649031	1	0.223739	0.00713552	0.162651	0	0.0634843	0	0.0771969	0.127669	0.148899		0	0	0	0.330775	0	0.408171	1	0.866805	0.380301	0.265324	0.0787057	0	0.355406	0.0885459	0.387334	0	0	0.0717079
0.17479	0.114023	0.266105	0	0	0	0	0.197872	1	0.611724	0.0404694	0	0	0	0	0	0.0148653	0.168531		0.0507022	0	0	0.0705893	0.2096	0.620999	1	0.24863	0.225928	0.167513	0.591611	0.229155	0.196625	0	0	0	0.0212235	0.0608188
0.123301	0.194816	0.210185	0.0386942	0.0170346	0	0.0340781	0.556772	1	0.282026	0	0.0254146	0.0739011	0.155944	0.0926002	0.104813	0.0562496	0.0913561		0	0.237863	0.48747	0.634209	0.188811	0.180117	1	0.648015	0.409898	0.0239497	0.189755	0.0433358	0.512076	0.987874	0.0857031	0	0.00281027	0.347965
0.138111	0	0	0	0	0	0	0.124467	1	0.305131	0	0	0	0	0	0	0.128696	0.0223173		0.11992	0.141805	0.00774071	0.0560578	0	0.779118	1	0.664399	0.0631694	0.197204	0.254654	0.0468743	0.0791516	0.189375	0.424573	0.0273578	0.081272	0.207457
0.128563	0.12545	0.13706	0.013706	0	0	0	0.22264	1	0.298738	0	0	0.0413631	0.0620447	0	0.024092	0.149246	0.0792354		0.0865178	0.027031	0	0.0185227	0.054728	0.0242925	1	0.282445	0.187701	0.24553	0	0.0184536	0	0	0	0.108385	0.00198322	0.4812
0.841896	0.226239	0.468417	0.114672	0.100891	0	0	0	1	0.875713	0.0592857	0.458285	0.186343	0.347461	0	0	0.269722	0.747981		0.0159595	0	0	0	0.0252047	0.348372	1	0.275954	0.0751252	0.148999	0.314541	0.246015	0.155347	0.068523	0.0191729	0	0.0103576	0.134654
0.316698	0.256077	0.391188	0.0236659	0.00766545	0.024753	0	0.23281	1	0.510257	0	0	0	0.0767818	0	0	0.283984	0.12028		0.614151	0	0	0.0395994	0.123467	0.182388	1	0.594861	0.559465	0.297343	0.667277	0.770013	0.02736	0.200917	0	0	0.0681952	0.346939
0.367161	0.299285	0.391452	0.0185935	0	0	0.0325609	0.337525	1	0.672005	0	0	0.206409	0.288973	0.0825636	0	0.359481	0.209962		0.19749	0	0.186053	0.29115	0.198795	0.3375	1	0.21424	0.104749	0.0114639	0	0	0	0	0.0484373	0.678122	0	0.217176
0.103095	0	0	0	0	0	0	0	1	0.242642	0	0	0	0	0	0.123569	0	0.00814651		0.0357571	0	0.34687	0.0409937	0	0	1	0.724389	0.329586	0.126289	0	0.00988633	0	0	0	0	0	0.139151
0.189309	0.0545593	0.153661	0	0	0	0	0.474376	1	0.62222	0	0	0	0	0	0	0.129384	0.429136		0.458522	0	0	0.19604	0.301671	0.94133	1	0	0.348357	0.675041	0.965365	0	0	0.608359	0	0	0.162862	0.999859
0.0558517	0.326995	0.312871	0.223929	0.264996	0.13256	0	0.292443	1	0.301704	0.020667	0	0	0.0341157	0.0709975	0.186864	0.191953	0.0863909		0.228192	0	0	0	0	0.505946	1	0.0465088	0.00315656	0.425814	0.0713175	0.620455	0.438879	0.835537	0	0	0	0
0.296509	0.0179759	0.0239029	0	0	0	0	0.188986	1	0.251225	0	0	0	0	0	0.0814988	0.341532	0.125809		0.834195	0.276414	0.0814292	0	0.812048	0.0537555	1	0.0159287	0.00828425	0.220404	0.0131659	0.349515	0.124372	0.873815	0	0.570808	0.13464	0.704644
0.166086	0.164057	0.344521	0	0	0	0	0.167591	1	0.443892	0	0	0	0	0	0	0.23386	0.0699453		0.125898	0.27184	0	0	0.203499	0.19117	1	0	0.543158	0.0832509	0	0	0	0.621519	0	0	0.102644	0.185124
0.210617	0.196549	0.421055	0.0681134	0	0	0	0.452207	1	0.340638	0	0.106652	0	0	0	0	0.108331	0.513068		0.886338	0.493619	0	0.120988	0.0649735	0.985875	1	0.718198	0.214068	0.0739599	0.00980508	0.128869	0.190703	0.0511476	0.515059	0.289256	0.236297	0.279686
0.401178	0.31988	0.331088	0	0	0	0	0.208854	1	0.422249	0	0	0	0	0	0.223985	0.5431	0.266752		0.593269	0.480578	0.100235	0.174736	0.0283834	0.462269	1	0.569277	0.235594	0.144215	0.258755	0.335759	0	0.220816	0.689091	0.476198	0.441651	0.595168
0.159873	0.118639	0	0	0.0639865	0.0182819	0	0.338789	1	0.211302	0.022665	0.0257021	0.0269508	0.0321668	0	0	0.0322213	0.184681		0.331105	0.458243	0.103293	0.349606	0.0781182	0.164039	1	0.636602	0.349051	0.583733	0	0	0.0737214	0.595391	0.621412	0.0648943	0.175267	0.167219
0.291546	0.85332	0.649303	0.251041	0.300091	0.0402678	0	0.488296	1	0.297323	0.394257	0.209711	0	0	0	0.33855	0.289686	0.0991833		0.0598276	0	0.0179078	0.194806	0.104831	0.531079	1	0.765217	0.731871	0.387844	0.520107	0.474631	0.399812	0.298052	0.102164	0.0731802	0.296055	0.339563
0.0906022	0.176622	0	0.184423	0.307372	0.153686	0	0.446619	1	0.0388089	0	0	0	0	0	0	0	0.0795453		0.388575	0.158516	0.123407	0.0264186	0.171117	0	1	0.527316	0.773324	0.827392	0.525809	0.841481	0.0403624	0.9835	0.148743	0.0647579	0.104239	0.401245
0.280724	0.320994	0.355316	0.100462	0	0	0	0.427774	1	0.249561	0.0540729	0.0148701	0	0	0	0.0490808	0.0982156	0.235428		0.117965	0.169039	0.128678	0.202784	0.550952	0.961067	1	0.600073	0.133243	0.63485	0.646287	0.206942	0.580324	0.266117	0.172798	0.932125	0.371686	0.199198
0.059186	0.0830338	0.381632	0	0	0	0	0.465141	1	0.463221	0	0	0	0	0	0	0.202951	0.1951		0	0	0	0.00988903	0.109253	0.87963	1	1	0	0	0.0997721	0	0	0	0	0.0053496	0	0
0.164724	0.0793321	0.158922	0.0135385	0	0	0	0.21099	1	0.302158	0	0.00858628	0.0858628	0.0735967	0	0	0.075965	0.0789194		0.0440514	0.385504	0.0955441	0.00665472	0.0182533	0.582482	1	0.635164	0.217772	0.463308	0.140563	0	0.0262423	0.23076	0.656069	0.0957636	0.125836	0.0859974
0.264741	0	0	0	0	0	0	0	1	0.572293	0	0	0	0.0932134	0	0.0618005	0.265444	0.015864		0.51309	0.365225	0.0153785	0.37222	0.243121	0.548166	1	0.646994	0.0679745	0	0	0	0	0.178333	0.749272	0.192487	0.0289026	0.599112
0	0	0	0	0	0	0	0.970389	1	0.0893721	0	0	0	0	0	0	0	0.0107535		0.277341	0.865325	0.0615292	0.54858	0.667834	0.303779	1	0.706094	0.449999	0.415721	0.496314	0.416188	0.399299	0.503814	0.67645	0.492477	0.310397	0.728967
0	0	0	0	0	0	0	0	1	0	0	0	0	0	0	0	0	0.0490824		0.0691957	0.0195919	0.414376	0.184167	0.557938	0.104221	0.0937757	1	0.466271	0.291681	0.192714	0.69079	0.219298	0	0	0	0	0.0284035
0.0701256	0.133959	0.146069	0	0	0	0	0.387987	1	0.316258	0.0219726	0	0	0	0	0	0.0550832	0.0327695		0.445332	0.607623	0.921349	0.790693	0.580669	0.936996	0.228834	1	0.505204	0.0305254	0.314617	0	0.881954	0.183777	0	0	0	0.0593323
0.90382	0.202047	0.0510233	0.403934	0	0	0	0.668893	1	0.150151	0	0	0	0	0	0.283376	0.43451	0		0.224897	0	0.0282219	0.0608112	0.68103	0	0.101409	1	0.623529	0.789546	0.597259	0.441326	0	0	0	0.379245	0.345366	0.23174
0.118994	0.162191	0.198184	0.0198184	0	0	0	0.154513	1	0.397944	0	0	0	0.0822792	0.12799	0.012799	0.20948	0.0822656		0.0169911	0.227506	0.190138	0	0.538454	0.5211	0.934635	1	0.175741	0.0446885	0.610223	0.854313	0.759389	0	0	0.212445	0.983826	0.111026
0.190129	0.162158	0.229277	0.161901	0.114677	0	0	0.169936	1	0.320882	0	0	0	0.0563471	0	0	0.136532	0.0192146		0.0431871	0.00808513	0.10458	0.176241	0.757784	0.552687	0.882962	1	0.777521	0	0.301698	0	0.105224	0.170215	0	0	0	0.246871
0.0931449	0.0825371	0	0	0	0	0	0.0159867	1	0.576577	0	0	0	0.113386	0	0.0628368	0.358441	0.0376442		0.0218365	0.0146298	0	0	0.0952484	0.695798	0.598552	1	0.105911	0.0527947	0.661778	0	0	0	0	0.244242	0.158994	0
0.218994	0.392837	0.379267	0.0254406	0	0	0	0.381312	1	0.398811	0	0	0.0455124	0.0910247	0	0.0189358	0.190761	0.0621793		0.0220095	0.197683	0.0185528	0.286984	0.812479	0.812479	0.84886	1	0.628513	0.562485	0.0600521	0.458888	0.745546	0.300997	0.441856	0.441856	0	0.154544
0.0540207	0.152407	0.0952545	0	0	0	0	0.212342	1	0.339549	0	0	0	0	0	0	0	0.00569697		0.0120738	0	0.573685	0.655639	0.46296	0	0.43647	1	0.147193	0.15547	0.696832	0.554101	0.290282	0	0	0	0	0.0870212
0	0	0.24931	0.191979	0.593936	0	0	0.167973	1	0.182513	0	0	0	0	0	0	0.111417	0.21179		0.807924	0.152545	0.159357	0.437748	0.297015	0.265908	0.210405	1	0.240583	0.287117	0.325163	0	0.303562	0.00371089	0	0	0	0.598098
0.169397	0.0169551	0.06415	0	0	0	0	0.379238	1	0.220334	0	0	0	0	0	0.129741	0.0163364	0.0908455		0.116411	0.233443	0.297731	0.0705435	0.208119	0.03372	0.288547	1	0.568991	0.122303	0.0444739	0.00634182	0.0633317	0.014279	0.0162024	0.00676527	0.0467103	0.0715391
0.252735	0.0101068	0.0909609	0	0	0	0	0.571734	1	0.229352	0	0.0782209	0	0	0	0.0600659	0.0175056	0.0654856		0.0303739	0	0	0	0	0	0.178129	1	0.989686	0.480929	0	0	0.482349	0.0153442	0	0	0	0.0341564
0.289672	0.540522	0.451851	0.0229734	0	0	0	0.411639	1	0.650692	0	0	0.171398	0.239957	0	0	0.488671	0.309701		0.25107	0.278333	0.288782	0.100821	0.252096	0.084391	0.117754	1	0.518139	0.510729	0.106525	0	0	0.00993413	0	0.100829	0.193212	0.569082
0.0268286	0	0.240142	0.739003	0.65934	0.0941914	0	0.40161	1	0.375857	0	0.0716617	0.716617	0.716617	0.102374	0.0338949	0.598344	0.323313		0.265353	0.512844	0.286075	0.510174	0.137153	0.0922782	0.383645	1	0.594344	0.335513	0	0	0.234623	0.0121103	0	0	0	0.195366
0.362051	0	0	0	0	0	0	0.468777	1	0.259741	0	0	0	0	0	0	0.173114	0.389412		0.143082	0	0.623207	0.0760526	0.215421	0.138465	0.302247	1	0.80499	0.772578	0	0	0	0.0183177	0	0.0642121	0.63323	0.718537
0.182757	0.178428	0.274237	0.0710077	0.0957968	0	0	0.245736	1	0.372085	0	0	0	0.0278554	0	0.0880785	0.239779	0.0765668		0.158314	0.0676226	0.536198	0.377607	0.356473	0.358687	0.610812	1	0.842815	0.689053	0.134397	0	0.10768	0.00780051	0.0309656	0.0320464	0.0207172	0.137945
0.331102	0	0.443432	0	0	0	0.38712	0.663635	1	0.416334	0	0.187774	0.125182	0	0	0	0.670053	0.283441		0.0788023	0.236027	0.344717	0.280114	0.0421412	0.223903	0.40325	1	0.542811	0.294602	0	0	0	0.00459605	0	0.114556	0.0763709	0
0	0	0	0	0	0	0	0	1	0	0	0	0	0	0	0	0	0		0.281298	0	0	0	0	0.233046	0.725906	1	0.643127	0.838457	0.0379302	0	0	0.285974	0.188877	0	0.0355999	0.0728063
0.0464732	0	0	0	0	0	0	0.10118	1	0.284418	0	0	0	0	0	0	0	0.117486		0.184596	0.0711286	0	0	0	0	0	1	0.493291	0.174091	0	0.0305255	0	0.0813457	0.090783	0	0	0.195583
0.204288	0.022955	0.0493669	0	0	0	0	0.499823	1	0.716008	0.0631874	0.265387	0.0530774	0	0	0	0.487649	0.821019		0.193325	0.0806455	0.020988	0.136625	0.129573	0.159287	0.461394	1	0.479234	0.138442	0.060329	0.00648471	0	0.0323836	0.0189515	0.00827629	0	0.240663
0.0738324	0	0.777828	0.555966	0.709462	0.109432	0	0.232886	1	0.51987	0.4646	0	0	0	0.366737	0.834136	0.586947	0.12759		0.213091	0.294604	0.0234573	0.162921	0.0551218	0.0294735	0.319249	1	0.732063	0.237757	0.234193	0.0292524	0.167897	0.157507	0	0	0	0.149012
0.151358	0.0866696	0.0191033	0.166358	0.151234	0	0	0.139731	1	0.390354	0	0	0	0.0891253	0	0.0395987	0.125485	0.0346617		0.003964	0	0.157117	0.748176	0.748176	0.683117	0.875621	1	0.381142	0.19746	0	0	0	0	0	0	0	0.0790074
0.0451168	0.769289	0.66656	0.158171	0.483319	0.0667824	0	0.134453	1	0.748398	0.166551	0.054962	0.170699	0.369848	0	0.220203	0.387558	0.419004		0.264739	0.343823	0.0765524	0	0	0.128782	0.523179	1	0.37566	0.283273	0.160812	0.084027	0.0141463	0.0851007	0.0251414	0	0	0
0.139203	0.206078	0.22906	0.0146078	0	0	0	0.315612	1	0.331265	0	0	0.00912526	0.0547515	0	0.0307988	0.159711	0.0652343		0.595581	0.476244	0.437391	0.667361	0	0	0.586695	1	0.673124	0.407955	0	0.49639	0.0570402	0	0	0.163964	0	0.814075
0	0	0	0	0	0	0	0	1	0.609289	0	0	0	0	0	0	0	0.0251792		0.045316	0.0432066	0.0250293	0.146147	0.435119	0.435119	0.640478	1	0.545573	0.107474	0	0.193155	0.0247564	0	0	0	0.121272	0.128512
0.0643654	0.0388262	0.48694	0.547732	0	0.0898816	0.471879	0.295842	1	0.561419	0.500438	0.500438	0.500438	0.500438	0.500438	0.166813	0.505577	0.788003		0.0794263	0	0	0	0	0	0	1	0.973404	0.373761	0	0	0	0	0	0.283499	0	0
0	0	0.285662	0.133672	0	0	0	0.110526	1	0.773636	0	0	0	0.704452	0.704452	0.42153	0.0017342	0.0120498		0.00162199	0.00585176	0	0.44497	0.686367	0.754587	0.693769	1	0.685634	0.0796394	0	0	0	0	0	0	0.0878544	0
0.106736	0.188957	0.465125	0.573484	0.843586	0.855974	0.753192	0.53687	1	0.83773	0.668594	0.668594	0.668594	0.668594	0.668594	0.668594	0.673718	0.492055		0.823113	0.279858	0	0	0	0	0.276192	1	0.0938022	0	0.127203	0	0	0	0	0	0	0.323089
0.0353995	0.02636	0	0.144387	0.183551	0	0	0.131718	1	0.178193	0.718871	0.393854	0	0	0.123897	0.480947	0.167676	0.260867		0	0	0	0	0	0	0	1	0.511487	0	0	0	0	0	0	0	0	0
0.0758557	0	0	0	0	0	0	0	1	0.989583	0	0	0	0	0	0	0	0.0865894		0.8061	0.801364	0.373281	0.344661	0.544738	0.630419	0.673039	1	0.790142	0.250244	0.332558	0.334139	0.198998	0.760565	0.409244	0.0565317	0.0131746	0.043224
0.308525	0.152599	0	0	0	0	0	0	1	0.494505	0	0	0	0	0	0.189035	0.574744	0		0.0979919	0.0557473	0.435556	0.283452	0.115272	0.0923865	0.301238	1	0.0439165	0.322448	0.156427	0.51921	0.507337	0.869759	0.671902	0.375626	0.527595	0.722655
0.0176935	0.0167873	0	0	0	0	0.204252	0.325222	1	0.597487	0.058608	0.356899	0.556714	0.43554	0.0879121	0	0.0936373	0.0470966		0.168411	0.236053	0.471147	0.231365	0	0	0.0632821	1	0.0549769	0.377557	0.006079	0.171489	0	0.639915	0.326746	0.599466	0.518142	0.420609
0.722012	0	0	0	0.435849	0	0.50948	0.124963	1	0.836677	0.836677	0.836677	0.836677	0	0.0416904	0	0.100261	0.075328		0.76404	0.962693	0.494418	0.181903	0.182525	0	0.232681	1	0.0377472	0.144561	0.271454	0.348211	0	0	0.0949773	0.188954	0.0309576	0.0706055
0	0.156034	0	0	0	0	0	0	1	0	0	0	0	0	0	0	0.744154	0.907182		0.0906316	0.0602768	0	0.171683	0.639875	0.72925	0.781084	1	0.805137	0.443817	0.786821	0.890275	0.990646	0.565654	0.768615	0.213941	0.749771	0.36808
0.0504443	0	0.00264611	0	0	0.0856143	0.191993	0.289767	1	0.581493	0.012895	0.0421569	0.0383627	0.00920706	0	0	0	0.0225314		0.156134	0.309235	0.109294	0.0959651	0.374268	0.0531052	0.249437	1	0.256099	0.268706	0.382572	0.599812	0.166371	0.0191954	0.0341821	0.0167592	0	0
0.042714	0	0	0.00567047	0	0	0.0145782	0.477919	1	0.704756	0.752269	0.854462	0.279922	0.337013	0.0697868	0.113102	0	0.133662		0.0955048	0.0302358	0.0377113	0.116295	0.197924	0.436338	0.630877	1	0.595181	0.231041	0.472221	0.321326	0.0900064	0.206433	0.646495	0.18225	0.0592677	0.0964494
0.389876	0.31822	0.479386	0.0352557	0	0	0.12021	0.963374	1	0.310272	0	0	0	0	0	0.329856	0	0		0	0	0	0	0	0	0.0687364	1	0.542083	0.332681	0.0910789	0.0587207	0	0.146444	0.0286344	0.0167221	0.0135137	0
0.0828755	0.00431279	0.00365258	0.00415214	0	0.0134076	0	0.593376	1	0.450004	0	0	0	0	0	0	0	0.0183325		0.180802	0.370655	0.538523	0.0719149	0.36484	0.849847	0.538632	1	0.773687	0.414304	0.579567	0.740694	0.945594	0.44258	0.604053	0.169801	0.170245	0.416137
0.579675	0.114195	0.190739	0.552113	0.744557	0.366499	0.802596	0	1	0.183302	0	0.834993	0	0.414423	0.384565	0.558305	0	0		0.490989	0.0926856	0.427283	0.472437	0.0787396	0	0.195417	1	0.574595	0.443272	0.851598	0.22486	0.552017	0.443232	0.228931	0.275738	0.319392	0.237661
0.771711	0.990773	0	0	0.441916	0	0.560819	0.59737	1	0.486713	0	0	0	0.963593	0	0	0	0.203136		0.0466052	0.605815	0.199125	0.292647	0	0	0.402262	1	0.505939	0.474105	0.103562	0	0	0	0.0744956	0.0792551	0.263619	0.508849
0.405161	0	0.531825	0.109833	0	0.0688224	0	0.25413	1	0.297608	0.0819873	0	0	0	0	0	0.0201422	0.460554		0.0642701	0.376478	0.820228	0.471782	0.31174	0.158159	0.11202	1	0.682368	0.474178	0.233545	0.631422	0.579476	0.775849	0.111696	0.0483391	0.489678	0.284638
0.0677787	0	0	0.100789	0	0.0145182	0.0422705	0.26679	1	0.74166	0.0736081	0.184168	0.285113	0.152895	0.0602199	0	0	0.125359		0.828192	0.134856	0.372403	0.378041	0.488886	0.753085	0.544627	1	0.595954	0.544679	0.0273735	0.101125	0	0.031848	0.0414145	0.239975	0.142102	0.189797
0.842623	0	0.0266544	0.090588	0.308485	0.11773	0	0	1	0.545455	0	0	0	0	0	0	0.105556	0.0334571		0.0191944	0.0387962	0	0.0710016	0.248662	0.583668	0.532411	1	0.53405	0.105231	0.0620846	0.225491	0.405277	0.355721	0.248712	0.186888	0.34451	0.0995041
0.419251	0.118822	0.0774965	0.135214	0.141678	0.122637	0.607432	0.806516	1	0.13332	0.392445	0.224106	0.271111	0.0769931	0.861417	0.20865	0.107466	0.350486		0.232443	0.0421967	0.0595601	0.0714894	0	0.233274	0.187439	1	0.169385	0.0531184	0.114975	0.0120136	0.176793	0.0871883	0.0758006	0	0.018608	0.0945257
0.673143	0.177068	0.579162	0.790755	0.5807	0.469531	0.794263	0.910968	1	0.699769	0.369506	0.417471	0.247085	0.206977	0.444923	0.310448	0.668501	0.602292		0.0427106	0	0	0.0931893	0	0	0	1	0.728402	0.982055	0.0626861	0	0	0	0	0	0	0
0	0	0	0.0625858	0.232513	0.409992	0	0.0286478	1	0.942045	0.737837	0.12976	0	0	0	0.0752573	0.374306	0.0813452		0.0445277	0	0.114455	0	0	0	0.857276	1	0.596782	0.433983	0.421091	0	0.173318	0.0590915	0	0	0	0
0.0624523	0.0467316	0.124308	0.0695162	0.116606	0	0	0.11098	1	0.610927	0.442669	0	0	0	0.0829898	0.228645	0.0986359	0.00955675		0.598402	0	0	0	0	0.0323819	0.49513	1	0.389458	0.0494651	0.0334828	0.0973112	0	0.165937	0	0	0.724015	0.183455
0.233112	0.352641	0.846579	0.473614	0.469793	0.629115	0.301451	0.618408	1	0.332296	0.0272043	0.176876	0.0492176	0.516743	0.273374	0.63643	0.641465	0.19091		0.215517	0.145963	0.164667	0.61231	0.173324	0.0186345	0.573709	1	0.278061	0.381548	0.243165	0.0985163	0.0258056	0	0	0.266371	0.389828	0.560392
0.89245	0.0218077	0.673972	0.198848	0	0	0	0.0912484	1	0.72484	0	0.101978	0.292129	0	0	0.0637593	0.221503	0.0921189		0.793812	0	0.137213	0.0184744	0.0526966	0.938821	0.682543	1	0.595028	0.956294	0.269639	0.820206	0.604774	0.0781794	0	0	0.246144	0.775078
0.903827	0.175473	0	0	0	0	0	0.502694	0.377948	1	0	0.213255	0	0	0	0.261561	0.399058	0.291001		0.0565967	0.193345	0.181817	0.153047	0.327526	0.867926	0.708599	1	0.719924	0.527318	0.00906799	0.156	0.387193	0.209561	0.238409	0.616781	0.635582	0.116565
0.992703	0.177302	0.299965	0	0.0565194	0.161215	0	0.10569	0.0456686	1	0.754063	0.754063	0.754063	0.0712848	0.213854	0.236625	0.702677	0.147269		0.860667	0	0.22387	0.502061	0.208935	0.244411	0.162782	1	0.281765	0.511457	0.196432	0.515957	0.0206396	0	0	0	0.257443	0.116702
0.014038	0	0	0	0	0	0	0	0.813332	1	0	0	0	0	0	0	0	0.317448		0.0525952	0	0.102476	0.0968861	0	0.122988	0.289255	1	0.0707266	0.238287	0.0510837	0	0	0	0	0.0621189	0.271998	0.00549323
0.16462	0.610371	0.156871	0	0	0	0	0	0.0983459	1	0	0	0.161565	0.879634	0.133054	0	0	0		0.594429	0.103427	0.374602	0.593249	0.729746	0.391194	0.367782	1	0.522097	0.67567	0.516223	0.267949	0.0165653	0.186295	0.866709	0.278396	0.771212	0.191719
0.176278	0.670944	0	0	0.0395057	0	0	0.147966	0.887799	1	0.122565	0.145143	0.370642	0	0.133886	0	0	0.0689738		0.264664	0.186242	0.0575132	0.43963	0.943608	0.276757	0.416407	1	0.48027	0.0798988	0.234908	0.0680584	0	0.178484	0	0	0.273997	0.0883529
0.179857	0.665989	0.31543	0.098142	0.0235072	0	0	0.172361	0.619424	1	0.961513	0.53024	0.0658046	0	0.547648	0.774989	0.313591	0.442805		0.258221	0.116056	0.0172894	0	0	0	0.667632	1	0.0966164	0.203892	0.0680532	0.376831	0	0	0	0.0816602	0.0486478	0.169795
0.393069	0	0	0	0	0	0	0	0.374517	1	0	0	0.219659	0	0	0	0	0.69184		0.0979094	0.375806	0.156029	0.148575	0.244564	0.0739894	0.200017	1	0.231353	0.162589	0.0728935	0.212748	0.0395007	0.00905905	0	0	0	0.0961016
0	0	0	0	0	0	0	0	0.77453	1	0	0	0	0	0.427594	0	0	0.118004		0.327003	0.152545	0.180975	0.344367	0.158301	0.563032	0.623945	1	0.404676	0.141465	0.0528187	0.0110129	0.134278	0.0700152	0	0	0.0799689	0.031876
0	0	0	0	0	0	0	0	0.666667	1	0	0	0	0	0	0	0	0.406291		0.152049	0.813947	0.687098	0.121782	0.270806	0.592839	0.684681	1	0.957267	0.312889	0.303942	0.0394894	0.232175	0.0534788	0	0	0	0
0.221742	0.0383729	0.154371	0.0452525	0	0.208124	0.0789425	0.0280525	0.428407	1	0.455357	0.173458	0.742146	0.851901	0.573914	0.483493	0.990301	0.503663		0.242221	0.0960838	0.292409	0.0310006	0.501973	0.176845	0.200207	1	0.522786	0.535124	0.0416166	0.0165405	0.380986	0.898543	0.257894	0.246053	0.042793	0.717956
0.134619	0.375907	0	0	0	0	0	0.330106	0.656365	1	0.69326	0	0	0	0	0.498238	0	0.580404		0.132464	0	0	0.0878724	0.200938	0.552272	0.847838	1	0.903874	0.749091	0.546399	0.698964	0.9845	0.398127	0.120504	0.367626	0.775357	0.2918
0.223903	0.329975	0.351065	0.0313855	0	0	0	0.498993	0.605576	1	0.500356	0.900675	0.198737	0	0.159595	0.412032	0.100933	0.713829		0.810057	0	0.0895128	0.473641	0.378954	0.208055	0.0795481	1	0.398164	0.735521	0.028142	0.156207	0	0.2216	0	0.316389	0.994508	0.464806
0.207157	0.236674	0.274307	0.375418	0.147224	0	0	0.193224	0.967802	1	0	0	0.377125	0.55196	0.210568	0.703622	0.729983	0.391424		0.218821	0	0	0.0229204	0	0.229596	0.0980196	1	0.384262	0.476095	0.154284	0.0952401	0.321072	0.0329575	0.018986	0.282417	0.504102	0.527614
0.430564	0.144766	0.1444	0.099673	0	0.00984143	0.347593	0.236221	0.412204	1	0.0238081	0	0	0	0.100984	0.303331	0.177345	0.44788		0.0572764	0.71114	0.0263418	0	0.0875306	0.0500477	0.204018	1	0.805374	0.335224	0	0.0791692	0	0.248825	0	0.0559924	0.445041	0.118059
0.337685	0.688665	0.651885	0.970773	0.111491	0.130073	0.117864	0.359911	0.932199	1	0	0	0	0	0	0.145572	0.414599	0.528654		0	0	0	0.1545	0.0640804	0	0.873936	1	0.109155	0.416801	0	0.116822	0	0	0.143043	0.60634	0.608403	0.749394
0.293083	0.646776	0.0369575	0	0	0	0	0.373338	0.85197	1	0.119447	0.10373	0	0	0	0	0.14477	0.528983		0.587905	0.789925	0.0888057	0.0340769	0	0.0895887	0.132505	1	0.898948	0.536526	0.0824553	0.187306	0	0.251474	0.603394	0.0958295	0.256331	0.268456
0.264337	0.243011	0	0	0	0	0.028477	0.0767353	0.276425	1	0	0	0	0	0	0.344718	0.0121517	0.176331		0.130646	0.42168	0.360452	0.165135	0.0920616	0.0401677	0.201303	1	0.599397	0.00574039	0.106056	0.00643402	0.0255317	0.17619	0.0965245	0.171044	0.0338068	0.23819
0.379654	0.00390963	0	0	0.239263	0.299877	0.0397106	0.184347	0.330297	1	0	0.137089	0.548354	0.548354	0.548354	0.560582	0.632848	0.875273		0.323625	0	0.0636745	0.0272779	0.472418	0	0	1	0	0	0	0	0	0	0	0.0757187	0	0.251481
0.34365	0.326724	0.00109479	0.0253486	0	0.0590125	0.31549	0.444954	0.745536	1	0.231509	0.0463019	0	0	0	0.00323377	0.282591	0.806218		0.421976	0.2385	0	0.0773737	0.0704639	0.318814	0.821459	1	0.172718	0.0343272	0.110877	0.248982	0.171247	0.383022	0.528426	0	0.00793952	0
0.84129	0.216791	0.0419525	0	0	0	0	0	0.0570029	1	0.155382	0	0	0.113752	0.0299968	0.247474	0	0.407728		0.520386	0.0671333	0.129852	0.0972602	0.155166	0.745449	0.836069	1	0.460713	0.116194	0.210277	0.330163	0.780961	0.0977132	0.0783966	0.165335	0.16839	0.213477
0.640121	0.59073	0.0214538	0	0	0.0061104	0.0337622	0.372191	0.516899	1	0.286046	0.15576	0	0.114538	0	0	0.0744715	0.512523		0.103142	0.223556	0	0.0475861	0.137425	0.281715	0.293042	1	0.680588	0.214359	0.228905	0.589485	0.0189713	0	0.19161	0.0229106	0.0390233	0
0.762833	0.457066	0.29746	0.344519	0.353957	0.558477	0.875735	0.741216	0.661854	1	0.35891	0.259043	0.322501	0.335672	0.335955	0.440884	0.732019	0.848617		0	0	0	0.26854	0.375232	0.762842	0.619557	1	0.340112	0.0837216	0.166234	0.0622524	0.553051	0.7248	0.775389	0.915957	0.644661	0.195524
0.155429	0.0570296	0.0733779	0.12547	0	0.202341	0.0243287	0.135267	0.737463	1	0.237651	0.0208082	0	0	0.201831	0.193132	0.150719	0.563512		0.319551	0.187091	0	0	0	0	0	0	1	0	0	0	0	0	0	0	0.326782	0
0.61815	0.0118273	0.120171	0	0	0	0	0.0807357	0.881736	1	0	0	0	0	0	0	0.151704	0.573351		0.207553	0.383516	0.0999878	0.426142	0.0991127	0.391162	0.112636	0.626431	1	0.411727	0	0.175687	0	0.327601	0.238539	0.157951	0.0356487	0.172829
0.368451	0	0	0	0	0	0	0.115277	0.348377	1	0	0	0	0	0	0	0	0.386805		0.0724389	0.0318589	0.204489	0	0	0	0	0	1	0.392688	0	0	0	0	0	0	0.11241	0.164654
0.47306	0.200343	0.171862	0.328527	0.455801	0.517016	0.578398	0.654746	0.821361	1	0.558339	0.33417	0.43391	0.452659	0.314726	0.489342	0.833482	0.968235		0.1018	0.0265315	0	0	0	0.310578	0	0	1	0.459221	0.375415	0	0	0	0	0.498712	0.228577	0.0396778
0.568436	0	0	0	0	0	0	0	0.97726	1	0	0	0	0	0	0	0.059782	0.524392		0.0479625	0.000680663	0.836831	0.901825	0.627773	0.251109	0.100213	0.55135	1	0.852363	0.325085	0.316456	0.437722	0.467134	0	0.0687404	0.339264	0.0253623
0.111978	0.187031	0.542637	0	0	0	0	0	0.818617	1	0	0	0	0	0	0	0	0.356047		0.0474199	0	0	0	0	0	0	0	1	0	0	0	0	0	0	0	0	0
0.20576	0.183532	0.180352	0	0.0357155	0.0261999	0.314399	0.0410085	0.277201	1	0.57754	0.57754	0.681507	0.57754	0.682837	0.57754	0.708677	0.759571		0.307378	0.0141145	0	0.362214	0	0.247805	0.406532	0.18261	1	0.0910998	0.0712908	0.452786	0.0277339	0	0	0	0.591163	0.118589
0.0333912	0.0917514	0	0	0	0	0	0.453083	0.918868	1	0.944798	0.944798	0.944798	0	0.0335068	0.247341	0.173139	0.299882		0.839424	0	0	0	0	0	0	0	1	0.938911	0	0.726884	0.798261	0.0976647	0	0	0.169309	0.688021
0.636639	0	0	0	0	0	0	0	0	1	0	0	0	0	0	0.603712	0.231968	0.0358529		0.396707	0.964898	0.872904	0.282824	0.308072	0.925031	0.681693	0.183461	1	0.425513	0.253624	0.0340046	0.160357	0.0410791	0	0.00823817	0	0.0608976
0.776263	0.156398	0.194518	0.363289	0.272325	0.272325	0.272325	0.133732	0.425263	1	0.53101	0.53101	0.53101	0.337916	0.00725496	0	0.0756308	0.0478709		0.710067	0.286482	0.152863	0.339529	0.308351	0.735966	0.463546	0.0187362	1	0.508478	0	0	0.60607	0.272807	0	0.144932	0.0560438	0.327419
0.0877587	0.932424	0.326435	0.501291	0.587371	0.538751	0.206869	0.159155	0.609375	1	0.236926	0	0	0	0.0311296	0.446479	0.150588	0.182962		0.329048	0.32608	0.128785	0.347513	0.4518	0.689508	0.46357	0.355749	1	0.718281	0.112124	0	0.11908	0.277301	0.120045	0.0580941	0	0.36759
0	0	0	0	0	0.530327	0.329981	0	0	1	0	0	0	0	0	0	0.0621373	0.034433		0.331324	0.137844	0	0.13307	0	0.160543	0.163059	0.0283064	1	0.703401	0	0	0	0.00903234	0	0.0620043	0	0.291655
0.260521	0	0.332476	0	0.257017	0	0	0	0	1	0	0	0	0	0.0264892	0	0.107059	0.113784		0.135173	0	0	0.0711061	0.0962752	0.100695	0.146085	0.919281	1	0.00233267	0	0	0	0.00308842	0	0	0	0.388086
0.10462	0.112368	0.266316	0.139493	0.18089	0.140297	0.421974	0.926121	0.565415	1	0.626433	0.30155	0.30155	0.30155	0.318667	0.130969	0.0178143	0.0354864		0.100091	0.393243	0.333901	0.0821524	0.33754	0.408376	0.801007	0.0156582	1	0.534482	0.0979882	0	0.10813	0.066519	0	0	0	0.0568734
0.0869154	0.100922	0.693074	0.308033	0	0	0	0.302094	0.233286	1	0	0	0	0	0.00900228	0.384242	0	0.170652		0.49991	0	0	0	0.20164	0	0.171838	0.0742663	1	0.221952	0	0.122236	0.027904	0.279889	0	0	0	0.895957
0	0	0	0	0	0	0	0	0.125854	1	0	0	0	0	0.292944	0	0.0999546	0.103561		0.450277	0	0	0.386015	0.402449	0.785902	0.975649	0.142509	1	0.401091	0.270196	0.110513	0.285238	0.475157	0.0959345	0.0889589	0.0233802	0.358155
0.265195	0.335258	0.114732	0.26742	0.0298107	0.180486	0.188898	0	0	1	0.262352	0	0.217123	0.217265	0	0.0841957	0.0733983	0.0930198		0.0791377	0	0	0.378705	0.539175	0.0426976	0.482897	0.0659843	1	0.349187	0	0.100765	0.496954	0.198771	0.138363	0	0	0.0329695
0.105945	0.0799677	0.121099	0.343998	0.323256	0.473624	0.25921	0	0	1	0.374989	0.0882129	0	0.0515049	0	0	0.467705	0.128559		0.467072	0.222926	0.0310985	0.892811	0.653437	0.34914	0.368699	0.45027	1	0.489218	0.330632	0.180894	0.897696	0.336556	0.0196226	0.00693969	0.169069	0.0429706
0.0762647	0	0.00408298	0	0	0	0	0	0.414719	1	0	0	0	0	0	0	0	0.0440474		0.172394	0.0249958	0	0.384268	0.0978742	0.0962243	0.0564164	0	1	0.673756	0	0.00947164	0.436778	0.0660873	0	0	0	0.179526
0.0722076	0.0698192	0	0	0	0	0.0148168	0.382602	0.490049	1	0	0	0	0	0	0	0	0.91493		0.800621	0.166452	0.191937	0.10834	0.46593	0.0600981	0.106704	0.00311643	1	0.398018	0.304614	0.190796	0.343265	0.631073	0.137125	0.291382	0.111936	0.155727
0.619372	0.825512	0	0	0	0	0	0	0	1	0	0	0	0	0	0	0	0.318527		0.463466	0	0	0	0	0	0	0	1	0	0	0	0	0.052201	0	0	0	0.571242
0.0667912	0.239281	0.621615	0.445577	0.171063	0.0243924	0	0	0.205225	1	0.0913035	0.355069	0	0.0111254	0.114365	0	0.00604849	0.188683		0.548043	0.281581	0.420455	0.386997	0.481021	0.677231	0.709727	0.0128083	1	0.550071	0.340113	0.352702	0.203976	0.270858	0	0	0.0895484	0.381721
0.153609	0.0185663	0.0166793	0.0260236	0	0.0188318	0	0	0.503348	1	0	0	0	0	0	0	0	0.661171		0.29599	0.142249	0.0487311	0.49904	0.365121	0.385725	0.36359	0.121616	1	0.400587	0	0.068198	0.226477	0.00371745	0	0	0	0.373512
0.115155	0	0	0.0619781	0.0443334	0	0.0364187	0.339355	0.631483	1	0.169524	0	0.0950751	0.334296	0	0	0	0.16863		0.0865432	0.0832105	0	0.0148091	0.17049	0.0426078	0.215843	0.259011	1	0.599658	0	0.0158944	0.174196	0.285515	0.332323	0	0	0.165504
0.466483	0.222777	0.153909	0.0253696	0	0	0.124655	0.234165	0.0854094	1	0.0372566	0	0	0	0	0	0	0		0.0768451	0.00983183	0.132891	0.0869155	0	0	0.725888	0.782387	1	0.927053	0.0226791	0	0.383047	0.349635	0	0	0	0.0935641
0	0.0364723	0.143187	0.0469432	0.0591845	0	0	0.0521912	0.568046	1	0	0	0	0.0416278	0	0	0.0169143	0		0.0882922	0.0163355	0	0	0	0	0.0663802	0.00249265	1	0.771424	0	0	0.100574	0.0182505	0	0	0	0.177793
0.0692157	0.120576	0	0.0149723	0.140985	0	0.0220399	0	0	1	0.0600946	0.224874	0.636907	0	0	0	0	0.300251		0.206455	0	0.177852	0.212025	0.135658	0.553282	0.715402	0.012128	1	0.300583	0.0224416	0	0.283401	0.237497	0.13066	0	0	0.200458
0.168602	0.207145	0	0	0	0	0.110846	0.743276	0.947238	1	0	0	0	0	0	0	0	0		0.345146	0.284051	0.435729	0.705465	0.16774	0.155102	0	0.169603	1	0.846554	0	0	0	0.102481	0	0	0	0.371875
0.143529	0.109481	0.140545	0.228826	0.245171	0	0	0.750269	0.0778153	1	0	0.19817	0.104039	0.136504	0	0	0	0.529045		0.451711	0.257658	0.119926	0.191029	0.135247	0.468165	0.835196	0.0267864	1	0.63358	0.167057	0.0634771	0.179018	0.155453	0.0797656	0	0	0.761242
0.10253	0.336319	0.246545	0.289609	0.038012	0.32618	0.332661	0	0.0377594	1	0.15157	0	0	0.0392146	0.552018	0.154765	0.390139	0.168552		0.0419409	0.046503	0	0.0388836	0.130318	0.0408235	0.0123464	0.268658	1	0.38526	0	0.0377213	0.0167018	0.0955403	0.0999452	0.00453393	0.267352	0.178046
0.273011	0.388268	0.0231924	0	0.0979628	0	0.0421308	0	0.123849	1	0.0187685	0	0.150046	0	0.301705	0.120016	0.161709	0.351938		0.11924	0.0266319	0.253951	0.0419996	0.184949	0.254274	0.563806	0.758075	1	0.482543	0.23829	0.0526687	0.0970249	0.190167	0.0557412	0.0939873	0.45293	0.189373
0.192702	0.0117504	0.0206452	0.00524541	0.0465547	0.0301939	0.0499723	0.0301195	0.280126	1	0	0	0	0.0137342	0	0	0	0.927423		0.249382	0.202161	0	0.106947	0.33843	0.136868	0.289827	0.0412883	1	0.408842	0	0	0	0.0218767	0	0	0	0.369896
0.100218	0	0.00805888	0.00858854	0.0763965	0	0.0136508	0.0800146	0.157967	1	0.202237	0.0403107	0	0	0	0	0.0593738	0.507726		0.0693025	0.0262903	0.182648	0	0.230439	0.0469901	0	0	1	0.223753	0	0	0	0.626554	0.064862	0	0	0.176008
0.0840512	0	0	0	0	0.078547	0.251382	0.214592	0.719888	1	0.555847	0.528173	0.398156	0.227968	0	0	0.0189324	0.0136697		0.405782	0.166749	0	0	0.134562	0	0.276542	0.0251835	1	0.281101	0	0.744098	0.758183	0.0861603	0	0.0864292	0	0.736221
0.370406	0	0.0487964	0.17045	0.03737	0	0	0.107453	0.220736	1	0.18601	0	0	0.104957	0.238962	0.196475	0.382965	0.439648		0.117023	0.115763	0.179934	0.182076	0.353335	0.245305	0.315224	0.374806	1	0.610676	0	0	0.0477028	0.0056653	0	0	0.130418	0.235313
0.095495	0.0125732	0.0218097	0	0	0.344923	0.0420671	0.0227908	0.974333	1	0	0	0	0	0	0.0616826	0.142304	0.0755118		0.569624	0	0.248292	0.0558598	0.0966921	0.67067	0.453914	0.633899	1	0.718274	0.115675	0.00945283	0	0	0	0	0	0.147035
0.124217	0	0	0	0	0	0.0915748	0.0726365	0.0518618	1	0.260374	0.0736542	0	0.136238	0.0448151	0	0	0		0.170228	0.237243	0.255817	0.219722	0.143711	0.230804	0.372619	0.0559298	1	0.558658	0.15479	0	0	0.134693	0.0664584	0	0	0.374823
0	0	0.0241483	0	0	0	0.081434	0	0.323478	1	0	0	0	0	0	0	0.568298	0		0.211965	0.34346	0.369733	0.315936	0.189886	0.0886986	0	0.141703	1	0.661583	0.338373	0	0.164175	0.00789197	0	0	0.137165	0.987341
0.0717493	0.0302953	0.49223	0.568652	0.360971	0.909752	0.223383	0.00301523	0.131856	1	0.339838	0.327198	0.531104	0.0264402	0	0.00553814	0.0854748	0.0468661		0	0	0	0	0.240129	0.246708	0	0	1	0.161818	0	0	0	0.0391212	0	0	0	0.037137
0.0812263	0.102387	0.120675	0.350268	0.198938	0.445897	0.10545	0.0907414	0.260076	1	0.713419	0.170576	0.216311	0.0107687	0.0420462	0.00930619	0.128543	0.0612888		0.318875	0.303032	0.208732	0.303948	0.44697	0.388673	0.653902	0.0669396	1	0.513032	0.28449	0.113996	0.181689	0.249269	0.20867	0	0.00588614	0.458813
0.134807	0.0161884	0.0201861	0.0578057	0.0115611	0.0386189	0	0.011354	0.256981	1	0.958478	0.20418	0.141853	0.113452	0	0	0.0272436	0.021258		0.146098	0.120284	0	0.156444	0.277563	0.259039	0.566265	0.274691	1	0.657745	0	0	0	0.00326641	0	0	0	0.15044
0.23395	0.155079	0.0451149	0.273216	0.367007	0.447745	0.214519	0.147273	0.481291	1	0.607311	0.361621	0.8512	0.426404	0.0435347	0.012485	0.630964	0.506722		0.22716	0	0	0	0.253299	0.329289	0	0.109567	1	0.308037	0	0	0	0.00870107	0	0	0	0.335539
0.0305895	0.715562	0.709052	0.267963	0.0548205	0.11953	0.291895	0.287795	0.49099	1	0.761459	0.255987	0.0411217	0	0.170727	0	0.216077	0.0679359		0.23731	0.151408	0.356753	0.428507	0.568145	0.555603	0.49207	0.512615	1	0.625361	0	0	0.020708	0.107191	0.010358	0.0493937	0.0508457	0.225398
0.0122567	0	0	0	0	0.183777	0.809633	0.375114	0.0533346	1	0.631952	0.0130455	0	0.179529	0.0324236	0.228385	0.0619912	0.111607		0.822926	0.0332807	0	0.155863	0.490348	0.408179	0	0.119244	1	0.896007	0.340809	0	0	0.00524497	0	0	0.0774143	0.167452
0.552523	0.257771	0.0947713	0.382816	0.135288	0	0.0215732	0.679414	0.975026	1	0.222094	0.178524	0	0	0.0925679	0.0441819	0.0529268	0.0810146		0.187768	0.45749	0.0688676	0.175114	0.624491	0.622732	0.777305	0.205123	1	0.994632	0	0	0	0.00332161	0	0.069628	0.0171903	0.243768
0.341293	0.0177333	0	0	0.00482674	0.135149	0.132443	0.221289	0.168386	1	0.751076	0.664991	0.468047	0	0	0.081133	0.940221	0.199085		0.470914	0.0758188	0	0	0	0	0	0	1	0.48457	0	0	0	0.400775	0	0	0	0.780455
0.114183	0.509673	0.442235	0.109419	0.120811	0.516508	0.15903	0.469282	0.959707	1	0.421681	0.434482	0.15772	0.0549938	0.116509	0.0639902	0.0407555	0.0945507		0.216289	0.121774	0	0.0935285	0.0535948	0.102941	0.481654	0.0772355	1	0.371934	0.0517618	0.0340609	0.640278	0.0858213	0.0178357	0.0052939	0	0.212378
0	0	0.0937025	0	0.120492	0.212308	0	0	0.306737	1	0.326664	0	0	0	0	0	0.0572731	0.859974		0.257646	0.317384	0.35396	0.135344	0.149572	0.599098	0.937759	0.337224	1	0.422322	0.257983	0.0774073	0.0182055	0.163594	0	0.0243268	0.0944224	0.359322
0.516408	0.436769	0.409111	0.149169	0	0	0	0	0.121524	1	0.535677	0.216395	0.632734	0.0568014	0.12443	0.303376	0.00868027	0.197331		0.232938	0	0	0.499876	0	0	0.717101	0.158613	1	0.35504	0.127255	0	0	0.0380634	0	0	0	0.488995
0.213872	0.100366	0	0.129751	0	0	0	0.0130576	0.229825	1	0.123775	0	0.070934	0.245752	0.014456	0.0829359	0.106837	0.14311		0.144715	0.0565632	0.0648549	0	0.068743	0.270893	0	0.0401331	1	0.422735	0	0	0	0.00765001	0	0	0.0529675	0.0652148
0.121458	0	0.649353	0.619837	0.619837	0.588029	0.736153	0.157034	0.02542	1	0.451815	0.123997	0	0	0.0955215	0	0.195846	0		0.0704923	0	0	0.0281961	0.338385	0.0401192	0.498032	0.344908	1	0.614303	0.111566	0	0.0892983	0.186629	0.167963	0	0	0.045848
0.309686	0.146028	0.472252	0.525236	0.673696	0.407696	0.332455	0.166063	0.708548	1	0.431999	0.363496	0.381797	0.119655	0.0751123	0.237156	0.19222	0.055197		0.227236	0.419159	0.37429	0.44268	0.471304	0.268797	0.575072	0	1	0.589349	0.577358	0	0	0.29905	0.232595	0	0.157647	0.35078
0	0.0616227	0.0260837	0	0	0	0	0	0.25824	1	0.455819	0.0481527	0	0	0	0	0	0.113256		0.15867	0	0.0679319	0	0	0	0	0.250754	1	0.598454	0	0	0	0	0.268817	0.244117	0.0881991	0.157823
0.332133	0.0277	0	0.074296	0	0	0	0	0.715211	1	0.262903	0.094969	0	0	0.0414296	0.0259851	0	0.0281091		0.144774	0	0.151392	0.913394	0.443046	0	0.246459	0	1	0.603253	0.279011	0.293441	0.948519	0.111904	0	0.0644632	0.296873	0.311369
0.0874976	0.0828576	0	0	0	0	0	0	0.705177	1	0.323029	0	0	0	0	0.216061	0.0434966	0		0.23145	0.0747021	0.275801	0.0946322	0.10802	0.0123284	0.667802	0.914589	1	0.845489	0.0692069	0	0.279591	0.299672	0.0934439	0.0976662	0.0502116	0.07101
0.132238	0.0613452	0.292841	0	0.00965001	0.3474	0	0.0254523	0.532688	1	0.0990881	0	0	0.454919	0.0377932	0.040297	0.0332933	0.392668		0.714293	0.237664	0.24514	0.0839886	0.804459	0.0768633	0.138793	0.250923	1	0.666498	0	0	0.813114	0.0589629	0.0855774	0	0	0.72361
0.210974	0.275751	0.36822	0.391813	0.2848	0.532171	0.35449	0.0849255	0.301196	1	0.591358	0.258384	0.388202	0.0681225	0	0.00392421	0.0941642	0.0341404		0.013111	0	0	0	0	0.0197486	0.20847	0.498647	1	0.533061	0.0040655	0.0174356	0.0557411	0.0999523	0.0537347	0.00290888	0	0.0721956
0.6573	0.347668	0.347062	0.771828	0.621837	0.460022	0.208299	0.182547	0.503748	1	0.574516	0.150442	0.483544	0	0.0673755	0.139042	0.129851	0.0807268		0.0974733	0.033114	0.0685117	0	0	0	0	0	1	0.218825	0	0	0	0	0	0	0	0
0.419457	0.20018	0.0427953	0.551462	0.496426	0.402625	0.868495	0.822921	0.571563	1	0.736659	0.847515	0.243605	0.511838	0.562542	0.183957	0.435447	0.556554		0.180696	0.0936863	0.0228437	0.0543151	0.163389	0	0.0560359	0.466776	1	0.577312	0.095839	0.295276	0.131039	0.015586	0.640982	0.0224199	0	0.620007
0.0293632	0.446016	0	0.154904	0.353378	0.501982	0.397279	0.533908	0.287943	1	0.993614	0.910525	0.308679	0.237484	0.272322	0.148237	0.138866	0.389638		0	0.0896422	0	0	0	0	0	0.318226	1	0.246908	0	0	0	0	0	0	0	0
0.288536	0.0220594	0	0	0	0	0	0.419454	0.017203	1	0.472325	0	0	0	0.0517037	0	0.0282342	0.0944356		0.656127	0.0673086	0.00193301	0	0	0	0	0.635832	1	0.944911	0	0	0	0	0	0.00774972	0	0.120027
0.16739	0.650497	0.198633	0.115348	0	0	0	0.0336407	0.78148	1	0.90963	0.420811	0.599894	0.175898	0.8059	0.366835	0.0552255	0.204501		0.0911006	0.0700853	0.10095	0.0519429	0.227277	0	0	0.193785	1	0.607574	0.14592	0	0	0	0.0218882	0.0491381	0.0134743	0.574809
0.678134	0.132102	0.659204	0.613761	0.14117	0.103999	0.286737	0.311166	0.588578	1	0.504589	0.193017	0	0	0.0785226	0.0685847	0.237487	0.133158		0.122337	0.0167144	0.00729169	0.602154	0.0115799	0	0	0	1	0.792631	0.242016	0.620792	0.452533	0.0601292	0.346239	0	0	0.0159082
0.0497224	0	0	0.0680021	0.146884	0	0	0.0693022	0.0295375	1	0.279006	0	0	0	0.0956876	0.0871997	0.284121	0.154811		0	0.0471891	0	0	0.372132	0	0	0.0365062	1	0.772958	0	0	0	0	0	0.0102466	0.0174614	0.050187
0	0	0.133403	0.079587	0.0743116	0.096544	0.0516637	0.138355	0.503363	1	0.285509	0	0	0	0	0.0367983	0.0544544	0.00559214		0.095354	0	0.00354509	0	0	0	0	0	1	0.527428	0	0	0	0	0	0	0	0.0611332
0.0630398	0	0	0	0.0852351	0.108644	0	0.0766483	0.77306	1	0.32783	0.539542	0.010548	0.0445768	0.0253003	0.0980257	0.518455	0.0477855		0	0	0.161703	0	0	0	0	0	1	0.166471	0	0	0	0	0	0	0	0
0.601832	0.524734	0.341503	0.0266064	0.0103857	0.098623	0.140808	0.585942	0.080932	0.743296	1	0.574265	0.032834	0	0	0	0.196411	0.126843		0.148267	0	0	0	0	0	0	0	1	0.16188	0	0	0	0	0	0	0	0.0366309
0.633985	0.308074	0.304124	0	0.370871	0.338487	0	0.434216	0	0	1	0	0	0	0.45319	0	0	0.0807507		0.0351858	0.0209528	0	0	0	0	0	0	1	0.384523	0	0	0.352583	0.012017	0	0	0.11939	0.40698
0.604471	0.282631	0.792718	0.613448	0.480992	0.362349	0.204457	0.414646	0.592053	0.619531	1	0.701993	0	0	0	0	0	0.0338345		0.571605	0.0390409	0	0	0	0	0	0	1	0.967747	0	0	0	0.00750766	0.119938	0.155475	0	0.0212847
0.49771	0.310183	0	0	0	0	0	0	0.0533521	0.699579	1	0.2	0	0	0	0	0	0.089685		0.1905	0.0655468	0.0905619	0	0	0	0	0.3977	1	0.692844	0	0	0	0	0	0	0	0.409544
0.491168	0.880217	0.016656	0.189959	0	0	0	0.134939	0	0.108014	1	0.103962	0.318015	0.530025	0.630987	0.0241742	0	0.11765		0.820975	0.0366722	0.00688699	0	0	0	0.312675	0.178843	1	0.606707	0.182646	0	0	0.0275615	0	0	0	0.700026
0.784989	0.414865	0.0582577	0.717713	0	0	0	0	0	0	1	0	0	0	0	0	0	0.0343953		0.0431846	0.0352233	0	0.179419	0	0	0	0	1	0.47217	0	0	0	0	0	0	0	0.548576
0.362723	0.123085	0	0	0	0	0	0	0.839604	0.3497	1	0	0	0	0	0	0	0		0.0328562	0.0134641	0	0	0.19992	0.365071	0.331883	0.274236	1	0.998566	0	0	0	0.063022	0	0	0	0.0870024
0	0	0.0426248	0.298374	0	0	0	0	0	0.384	1	0	0	0	0.085409	0	0.760574	0.241477		0.258205	0.0338385	0	0	0.182018	0.164898	0.0136154	0.112645	1	0.398798	0.277438	0	0	0.0504366	0	0.103442	0.429792	0.416588
0.191479	0.0390819	0.202253	0.0309433	0.168268	0.175647	0.052292	0.0267125	0.312471	0.919624	1	0.209151	0	0	0	0	0.0456585	0.679423		0.147096	0.0446482	0.0676097	0.351315	0	0.147053	0.372899	0.692168	1	0.167028	0.205271	0.238099	0.286278	0	0.191418	0.737674	0.0448064	0.126124
0.133637	0.100485	0.318689	0	0.156955	0.933438	0.0358869	0.596352	0.305521	0.473088	1	0.572525	0	0.167559	0.0633	0	0.22804	0.124055		0	0	0.0154388	0	0	0	0	0	1	0.652749	0	0	0	0	0	0	0	0.0799405
0.194658	0.186579	0.493796	0.895909	0.248911	0.405801	0.0278693	0.219215	0.15947	0.0850203	1	0.149904	0	0.305899	0.56451	0.179574	0.0738879	0.100938		0.251797	0.4781	0.277678	0	0	0	0	0	1	0.852803	0	0	0	0	0	0	0	0.0459384
0.0446274	0.83617	0.894237	0	0	0	0	0	0	0.128	1	0	0	0.119673	0.0897551	0	0	0.0249402		0.104626	0.17244	0.0609182	0.378206	0.691246	0	0	0.474567	1	0.425408	0	0	0	0	0.0882566	0.0529539	0.313189	0.0102818
0.10956	0	0	0	0	0	0	0	0	0.0436364	1	0.0316206	0	0	0	0	0	0.0692471		0.311972	0	0	0	0	0	0	0.954545	1	0	0.0777361	0.156726	0	0	0	0	0	0.0674126
0.498431	0.22847	0.556882	0.0575767	0	0	0	0	0	0	1	0.168643	0.0870445	0.443136	0	0	0	0.468216		0.15161	0.0279698	0	0.302646	0.49402	0	0	0.0904512	1	0.354987	0.315309	0	0	0	0	0	0.814494	0
0.168181	0.496419	0.151321	0.416894	0.368275	0.372781	0.278832	0.0578547	0.155736	0.280781	1	0.123906	0.0233611	0.00945567	0.00991056	0.0247764	0.0372562	0.121506		0.146392	0.0112838	0.226756	0.0897575	0.0537072	0.698193	0.500878	0	1	0.0638858	0.0222189	0	0.260826	0.200636	0	0.155511	0.115373	0.0486013
0.237145	0	0	0	0	0	0	0.632168	0.84289	0.085443	1	0	0	0	0	0	0.180144	0.14727		0	0.0387577	0	0	0	0	0	0.428571	1	0	0.167095	0	0	0	0	0	0	0
0.21642	0.206157	0.379989	0.589555	0.0370524	0.00437259	0.0235447	0	0.0868967	0.184415	1	0.641579	0.379247	0.452517	0.342945	0.252442	0.114599	0.117167		0.453013	0.282254	0	0	0	0	0	0	1	0	0	0	0	0	0	0	0	0
0.0820357	0.0424093	0	0	0	0	0	0.139584	0	0.147059	1	0.142857	0	0	0.93473	0.31395	0.407736	0.0823672		0	0	0.393223	0	0	0	0	0	1	0.893288	0	0	0	0	0	0	0	0.0157
0.359804	0.0460643	0	0	0	0	0	0	0	0	1	0.66801	0.796266	0.534408	0.024895	0	0.0751761	0.225722		0.320711	0.0989882	0.165241	0.151341	0.509583	0.575264	0.110496	0.209062	1	0.949733	0.725478	0.16539	0.0950553	0.256524	0	0	0.409634	0.591105
0.456005	0.0968687	0	0	0.0112172	0.430756	0.203489	0	0	0.268638	1	0.534331	0.534331	0	0.165369	0.783608	0.225442	0.0285014		0.251298	0.85805	0	0.06081	0.0844978	0.0250474	0.190352	0.120159	1	0.386119	0.164967	0	0.571047	0.0538443	0.616064	0.0813961	0	0
0.149024	0.187693	0.109837	0.400273	0.139322	0.439201	0.211793	0.0354101	0.587609	0.501603	1	0.688815	0.121854	0	0.380449	0.146331	0.287756	0.0968494		0.0105673	0	0.363108	0.84179	0.825536	0.640375	0.438431	0.72874	1	0.839949	0.495821	0.298158	0.266406	0.111063	0.0523273	0.129424	0.0339503	0.0657442
0.110193	0	0.149481	0	0	0	0.0313982	0.05804	0.10312	0.988008	1	0.938705	0	0.0176862	0	0	0	0		0.0619614	0.139518	0.357032	0.63645	0.215824	0.447163	0.764411	0.941982	1	0.286909	0.63751	0.567878	0.494882	0.326412	0.0735371	0.0572363	0.357824	0.152257
0.120094	0.0670123	0	0	0.0947914	0.0553386	0.0714902	0	0.0273968	0.209375	1	0.961153	0.576692	0	0	0	0.068817	0.0233548		0.00987767	0.0863918	0	0.0179021	0	0	0	0	1	0.978049	0.215179	0	0	0	0	0.176704	0.115137	0
0.165447	0	0.0954026	0.468572	0.0771846	0.174219	0	0.326677	0.0339465	0.198064	1	0.490676	0.0486733	0	0.139366	0.258111	0.101769	0.0364571		0	0.0512221	0.255888	0.881374	0.89386	0.694932	0	0.109131	1	0.622098	0.0237392	0.0543599	0.0231915	0.123214	0	0	0.39967	0
0.161904	0.079314	0.0156566	0.0977582	0.232181	0.362604	0.341654	0.32693	0.179798	0.330295	1	0.788388	0.343738	0.42718	0.335403	0.0797686	0.0707174	0.071159		0.0154752	0.0376039	0	0	0.0524808	0.251519	0.302902	0.907118	1	0.612326	0.474574	0.131153	0.1341	0.163492	0.767334	0.289663	0.657431	0.57334
0.916479	0.233841	0.387302	0.545018	0.865601	0.363395	0.867794	0.798613	0.697675	0.223469	1	0.752412	0	0.381259	0.581938	0.158531	0.296003	0.39715		0.0343325	0.186827	0.232599	0.556435	0.978008	0.76963	0.383392	0.349038	1	0.759913	0.0477973	0.0265309	0.214129	0.103173	0.00575243	0.0357442	0.0557544	0.213933
0.00670228	0.152132	0.231458	0.0204411	0.139039	0.373293	0	0	0.173661	0.94531	1	0.55562	0.914081	0.435275	0.266327	0.0506118	0.826894	0.163407		0	0.528251	0.0912449	0.517452	0.869317	0.448093	0.344081	0.470039	1	0.250671	0.214546	0.31446	0.70041	0.47697	0.338849	0.122232	0	0.395249
0.255917	0.246076	0	0.161427	0.484282	0.463226	0.443925	0.104503	0.0626784	0.628115	1	0.312014	0.41746	0.118105	0.0908846	0.0376269	0.0202155	0.637636		0.484815	0	0	0	0	0	0.10197	0.54977	1	0.299806	0.0769032	0	0.506245	0.265376	0.449634	0.0656681	0	0
0.50652	0.094204	0.0090791	0.0663712	0	0	0	0.138227	0.355069	0.527482	1	0.775177	0	0.0496131	0.178098	0	0.0115077	0.160468		0	0	0	0.321937	0	0	0	0	1	0.955296	0	0	0	0	0	0	0	0
0.337086	0.379941	0.322542	0	0	0.0337589	0.500162	0.250733	0.211445	0.625462	1	0.413629	0.880945	0.362282	0.532018	0.249385	0.100691	0.131021		0.18263	0	0	0.109904	0	0	0	0.00900416	1	0.592698	0.480652	0	0	0	0.254257	0.05964	0.912141	0.305294
0.276508	0.106784	0.210825	0.383951	0.110853	0	0.0212961	0.234496	0	0.448119	1	0.502875	0.16818	0.443481	0.507915	0.318646	0.131794	0.286596		0.0413848	0.906486	0.481571	0.74463	0.391305	0	0.13808	0.304629	1	0.563498	0.644542	0.362985	0.037924	0.339468	0.0173369	0.0730935	0	0.0262628
0.327665	0.0489289	0.17697	0	0.30683	0	0	0.0551353	0.0617356	0.43067	1	0.88261	0.936868	0.0582026	0.0714681	0.111327	0.0567247	0.417919		0.263249	0.109876	0.0868112	0.158371	0.354436	0.558503	0.81185	0.645651	1	0.285634	0.0249702	0.144521	0.0234951	0	0.0403083	0	0.312509	0.22717
0.735071	0.0155637	0.0738649	0.402124	0.1977	0.278569	0.336066	0.33915	0.43679	0.830071	1	0.4182	0.578513	0.48584	0.236868	0.0673596	0.165284	0.220848		0.347067	0	0.208729	0.954811	0.157961	0.102625	0.00124091	0.182316	1	0.735714	0.108621	0.17218	0	0	0.242208	0.917205	0.0172269	0.407203
0.312243	0.414277	0	0.0961064	0.20759	0	0.197371	0.447021	0.726375	0.608832	1	0.741551	0.540695	0	0	0.0497374	0.232471	0.442447		0.622397	0.791394	0.0428893	0	0	0.360352	0.945508	0.785515	1	0.608607	0.0525781	0	0.103628	0.299147	0.607781	0.0768817	0.254606	0
0.271475	0.152725	0.230218	0.13463	0.428822	0	0	0.265307	0.265922	0.774649	1	0.451948	0.217287	0.532059	0.0354729	0	0.473098	0.297668		0.0519314	0.528248	0	0	0	0	0.0479367	0.0888668	1	0.848624	0.356889	0	0.0306319	0.356796	0.823735	0.0857947	0.471828	0.556524
0.13071	0.279867	0.434036	0.0297902	0.0965204	0.0402859	0	0.203475	0.148861	0.212957	1	0.478647	0.0120928	0.335124	0.399158	0.148001	0.290666	0.0497537		0	0	0	0.176254	0	0	0	0.0343677	1	0.7301	0.204017	0.473024	0	0	0	0	0	0
0.00221932	0.03406	0.0140771	0.0126333	0	0	0	0.151011	0.101759	0.639565	1	0.0646676	0.0525829	0.274751	0.816783	0.617221	0.107211	0.0573097		0	0	0.0261584	0.597907	0.0854152	0	0	0.0438197	1	0.842465	0.53626	0.565156	0	0.0747326	0	0	0	0
0.167591	0.0344545	0.00723489	0.0477361	0.190944	0.0608808	0.030169	0.0238391	0.0201525	0.387222	1	0.370352	0.310383	0.336255	0.278911	0.313985	0.0363764	0.0719027		0.852132	0.0662756	0.0108482	0.30914	0.0323237	0.140415	0.211133	0.420619	1	0.694417	0.17399	0.547499	0.0859774	0.0316089	0.153272	0	0.654307	0.860824
0.0260094	0.0534527	0.0644546	0	0.0389437	0	0	0.0546924	0	0.417545	1	0.460197	0.0400333	0	0.130406	0.141697	0.0629783	0.0766318		0.338954	0.0501737	0	0	0.0587504	0.450384	0.650883	0.557797	1	0.802616	0.183089	0.520169	0.14627	0.20357	0	0	0.0867242	0.18019
0	0	0	0.0568228	0.0255703	0	0	0	0.0134987	0.243887	1	0.283995	0	0	0	0	0.00111291	0.011107		0.25042	0.392007	0.502725	0	0.0626414	0.0827123	0.0529773	0.145432	1	0.264722	0.140475	0.433194	0.063398	0.0799506	0.0841527	0.361031	0.731108	0.27112
0.0856259	0.719323	0	0	0	0	0.133321	0.306031	0.398585	0.0373674	1	0.261175	0.268227	0	0	0	0.0278623	0.423243		0.509404	0	0	0	0	0	0.571708	0.145531	1	0.189663	0.0987033	0	0	0	0	0	0	0.169063
0.103101	0.0103141	0.0812629	0.114509	0	0.335275	0.535369	0.433148	0.024912	0.797756	1	0.268168	0.065707	0	0.148888	0.161365	0.287111	0.15139		0.101856	0	0	0.0220054	0.0962436	0.181651	0.0811761	0.381225	1	0.228091	0	0.00679285	0	0	0	0	0.163422	0.173369
0.291121	0.166019	0.110879	0.0433752	0.421695	0.62093	0	0.0851738	0.185752	0.838428	1	0.299505	0.127705	0.274662	0.00945737	0.2232	0.515343	0.555887		0.611757	0.0192065	0.00214432	0.127636	0.0479546	0.345335	0.0297657	0.637645	1	0.121782	0.184984	0	0	0	0	0	0.225654	0.0607944
0.810534	0.0530571	0	0	0	0	0	0.475259	0.281883	0.788582	1	0.359894	0	0	0.15898	0	0.0764231	0.49154		0.202119	0.599112	0.0803177	0.470235	0.475369	0.546701	0.735152	0.772399	1	0.348249	0.127406	0	0	0	0	0	0.53343	0.55696
0.0685436	0.209372	0.335482	0.75881	0.784415	0.121633	0.0548913	0.0176162	0.411943	0.89281	1	0.796767	0.175033	0.0421127	0.314136	0.423836	0.306162	0.118623		0.107497	0	0	0.0324944	0.112734	0.474333	0.40522	0.310429	1	0.743698	0.0251763	0.101902	0.214178	0.115433	0	0	0.0237509	0.66237
0.1079	0	0	0	0	0.120238	0.350242	0.262783	0.579704	0.650527	1	0.124008	0	0.171721	0.0754115	0.23968	0.00197103	0.102979		0.228976	0	0	0.148652	0	0.00604308	0.00978567	0.449565	1	0.586545	0.0211552	0	0	0	0	0.799348	0	0
0.0942923	0.0841759	0.0358095	0.0475797	0.145885	0.304624	0.521105	0.766841	0.431472	0.65512	1	0.385746	0.0175987	0	0.238551	0	0.0063945	0.0239113		0.05558	0	0	0.305571	0.366328	0.102146	0.0382438	0.127932	1	0.160716	0.0300813	0.0693861	0	0	0.335066	0.203275	0.188935	0
0.646498	0.0781354	0	0	0	0	0	0	0.0506995	0.128561	1	0.0566993	0.14591	0.829016	0.120991	0	0.145202	0.0473667		0.0874562	0	0	0	0	0	0	0.13045	1	0.794446	0.0830624	0.229835	0	0	0	0	0.388745	0
0.465753	0.0317451	0	0.294201	0.104605	0.0548311	0.032096	0.286814	0.151769	0.193347	1	0.786355	0.143418	0	0	0.0515704	0.384324	0.824303		0.965053	0.889886	0.259803	0.405087	0.277146	0.508803	0.394978	0.627895	1	0.328807	0.00533226	0.108732	0.226537	0.822083	0.97158	0.302578	0.405464	0.906917
0.236697	0.1903	0.0217787	0.117859	0.166065	0.340788	0.288214	0.455109	0.251841	0.757026	1	0.519845	0.338636	0.442382	0.331211	0.0538605	0.142376	0.170058		0.0977028	0	0	0	0.219282	0.0512849	0.152678	0.654064	1	0.595335	0.131395	0.25021	0.25898	0.636378	0.576581	0.0228581	0.613813	0.399261
0.142022	0.618237	0.523679	0.208281	0	0.0738114	0	0.0621496	0.0189131	0.149259	1	0.596322	0	0.0192239	0.140482	0	0.090944	0.0922887		0.067711	0	0.0663185	0.00180021	0.0460847	0.605775	0.875618	0.495858	1	0.27697	0.235044	0.45968	0.493392	0.644496	0.315575	0	0	0.342555
0.450403	0.569848	0.117321	0.336603	0.0110497	0.245437	0.357671	0.43903	0.00681633	0.749108	1	0.687656	0.193457	0.443395	0.628936	0.318953	0.272216	0.0182733		0.0185434	0	0.0326125	0.0241718	0.175076	0.0354566	0.0446224	0.272246	1	0.34787	0.0942785	0.13146	0.0902659	0.113744	0.0356135	0.006678	0.147615	0.117803
0.0953	0.0177029	0.00111331	0	0.0490199	0.0117222	0.00310054	0.00796434	0.134139	0.247169	1	0.557434	0.325316	0.198098	0.0180413	0.02317	0.0212064	0.0598963		0	0.118042	0.0556786	0.525195	0.445148	0.115124	0	0.311237	1	0.241624	0.0723969	0.149326	0	0.164943	0.0564745	0.271134	0.0546941	0.0194502
0.0628105	0	0.661612	0.640741	0.899946	0.165724	0.38469	0.124284	0.563788	0.74616	1	0.479206	0	0.0918249	0.268193	0.485785	0.249302	0.445907		0.185137	0.763258	0.215852	0.104689	0.106083	0.117462	0	0.299458	1	0.168581	0.230502	0.0826702	0.106522	0.163091	0.0380347	0	0.0214426	0.0167435
0.911775	0.115523	0.0421076	0.0887733	0.092316	0.00942142	0.0126404	0.13072	0.0403606	0.403805	1	0.847507	0.512516	0.207409	0.150977	0.0289785	0.35178	0.214538		0.356396	0	0.245122	0.17831	0.123437	0	0	0.367422	1	0.365786	0.097059	0	0	0	0	0.14144	0.121349	0.39163
0.882485	0.420143	0.453025	0.491857	0.296829	0	0	0	0.0289666	0.721658	1	0.725907	0	0.0233201	0.142857	0.11933	0.0697667	0.137854		0.19098	0.0912918	0	0.0333623	0.47518	0.657117	0	0	1	0	0.237093	0.442909	0	0	0.719014	0.787734	0.0331342	0.0287314
0.138232	0.24675	0.0187394	0	0.253856	0.283289	0.0904951	0.193085	0.218629	0.993079	1	0.291441	0.266885	0.0434422	0.362046	0.405806	0.281946	0.579165		0.969098	0.292039	0.0854392	0.308059	0.0655054	0	0.412458	0.641087	1	0.153399	0.294344	0.12603	0.0542109	0.232682	0.135826	0.20739	0.0170618	0.503544
0.122696	0.138964	0.0248492	0.0736567	0.0709485	0	0	0.169066	0.585136	0.714865	1	0.424503	0.331441	0.189124	0.34906	0.256963	0.212309	0.187792		0.410217	0	0.575248	0.152111	0.0390894	0	0	0	1	0.420573	0.0695963	0.366299	0.297735	0.185183	0.0578511	0.0616448	0.090605	0.265793
0.0439439	0.142869	0	0.318104	0.715767	0.101425	0.017696	0.0877952	0.311869	0.42068	1	0.790639	0.0634627	0.165687	0.179039	0.255213	0.0955229	0.446952		0	0	0	0.00224089	0.0734892	0	0	0	1	0.25921	0	0	0	0	0	0	0.066489	0.419398
0.304708	0.400138	0.31676	0	0	0	0.223554	0.200545	0.948011	0.0371931	1	0.339714	0.0905255	0.242585	0.0852241	0.04667	0.0254091	0.108228		0.506377	0	0	0.143892	0	0	0	0	1	0.291407	0	0.182639	0	0	0	0	0.203858	0.1352
0.0161527	0.0598884	0.022511	0.642099	0.337709	0.285897	0	0.012004	0.439851	0.518574	1	0.871025	0.826625	0	0.0727372	0.0715895	0.344845	0.0608962		0	0	0.395117	0	0	0	0	0	1	0.476277	0	0	0	0	0	0	0	0.293549
0.572733	0.619174	0.0430701	0.221288	0.165863	0.220412	0.189784	0.324486	0.485783	0.799742	1	0.234238	0.290237	0.105384	0.569976	0.3816	0.400268	0.284534		0	0	0	0.00101359	0	0	0	0.376884	1	0.0896254	0.180137	0.0515566	0.359502	0.0845161	0	0.00307416	0.00200166	0.0143225
0.544913	0.0643945	0	0	0	0	0	0.357272	0.0297727	0	0.323129	1	0	0	0	0.861015	0.469407	0.59894		0.144113	0	0.382892	0.00601328	0.302597	0.698014	0.45895	0	1	0.894435	0.0348679	0.0262372	0	0	0	0.537504	0.126482	0.0386035
0.906973	0.500984	0	0	0	0	0	0	0.0793788	0	0	1	0	0	0	0	0	0.678829		0	0	0	0.108554	0	0.00827341	0.162035	0	1	0.180804	0	0	0	0	0	0	0.00956219	0
0.818952	0	0	0	0	0	0	0	0.285713	0	0	1	0	0	0	0	0	0.301462		0.100939	0.353288	0.0489046	0.00540772	0	0	0	0.220458	1	0.291089	0.0504634	0	0	0.14681	0.622216	0.312143	0.0531345	0.262656
0.405092	0	0.654413	0.120984	0	0.131702	0.79021	0.755853	0.314939	0	0.0909091	1	0.833333	0	0	0	0	0.00569448		0.0439226	0	0.0298662	0.00489774	0.159668	0.0495372	0.230231	0.601869	1	0.311906	0.157688	0.150658	0.128803	0.462019	0.460166	0.409475	0.16632	0.126438
0.110431	0.220723	0.147524	0.0191359	0	0	0.176637	0.0217716	0.0507968	0.150841	0.379993	1	0.635694	0.381416	0.106519	0.356648	0.448138	0.204825		0.0988397	0	0	0.0573192	0.0606649	0	0	0.105479	1	0.451532	0.0967968	0	0	0	0.0147249	0	0.0265427	0.070328
0.0273901	0.0308677	0.054449	0.0663532	0.291922	0.206306	0.751589	0.523248	0.901116	0.174024	0.574683	1	0.42288	0.381486	0.167687	0.107375	0.166031	0.00336369		0	0.0167738	0	0.276678	0	0	0	0	1	0.0298697	0.137893	0.134053	0.302741	0.0318674	0.161173	0.131029	0.0230208	0.154938
0.322057	0.0428398	0.440707	0	0	0.357052	0.221032	0.0934763	0.0814114	0.13057	0.902299	1	0.415818	0.279986	0.176288	0	0	0.137861		0.56366	0	0.034233	0.00105331	0.0145541	0	0	0.246324	1	0.246324	0	0.327499	0	0	0	0.000323156	0.00249348	0.312014
0.127876	0	0.722574	0.174125	0	0	0	0	0.144193	0.0709029	0	1	0.409091	0.319876	0.28343	0.292701	0.603364	0.782933		0.18162	0	0	0.00567646	0.0595023	0	0	0.934723	1	0	0.0237	0.0178336	0	0	0.966662	0.395734	0.273085	0.0895662
0.0520451	0	0	0	0	0	0	0.158069	0	0.146043	0	1	0	0	0	0	0	0.0745989		0.491589	0.0211883	0.124262	0.0962865	0.0663069	0	0	0	1	0.135866	0	0.0683439	0.266973	0.0174957	0	0.0389956	0.781501	0.237474
0.186927	0.76747	0.506919	0.157334	0.401053	0.330185	0.0686525	0.222426	0.244674	0.255931	0.644968	1	0.05959	0	0	0.0815417	0.232976	0.101323		0.237258	0.714335	0.131457	0.1527	0	0.10121	0.828078	0.764104	0.854335	1	0	0.539617	0.419702	0	0	0	0	0.279892
0.0471756	0.718153	0.662911	0.662911	0.687285	0.662911	0.662911	0.165728	0.585849	0.186513	0	1	0.507353	0	0	0	0.00277382	0.52844		0.028523	0.00250836	0.331823	0.23655	0.552456	0.459429	0.0805493	0.526958	0.307931	1	0.725685	0.0556169	0.253595	0.380393	0.228236	0	0	0.682802
0.232445	0.176388	0.468899	0.756367	0.647203	0.759771	0.0729304	0.154007	0.223362	0.256576	0.459079	1	0.611371	0.290689	0.0752729	0	0.303958	0.118913		0.390825	0.0365069	0.0159215	0.569498	0	0	0	0.402608	0.658856	1	0.624589	0	0	0	0.151569	0.2588	0.364582	0.217699
0.378841	0.94906	0.826888	0.208667	0.0955272	0.0631367	0.336729	0	0	0.248202	1	1	0.934993	0.817403	0.757469	0.461808	0.919258	0.680238		0.216744	0.2769	0	0.454207	0	0	0	0.0651141	0.0931004	1	0.288985	0	0	0	0	0	0.213311	0.132858
0.732562	0.0532489	0	0	0.0474124	0	0.129765	0.288367	0	0.119758	0.3	1	0.833333	0	0	0	0.00966663	0.0233249		0.0171408	0.0151998	0.0964882	0.0586576	0.255164	0.285354	0.115933	0.0967218	0.118077	1	0.144511	0	0	0.276827	0	0	0.197901	0.387968
0.219346	0.0318955	0.315637	0.660509	0.705999	0.347454	0	0.41269	0.341294	0.484335	0.939485	1	0.842848	0.631972	0.40784	0.858567	0.488376	0.191282		0.100506	0	0	0	0.113954	0	0	0.0575734	0.607599	1	0.699986	0.411749	0	0	0	0	0.100636	0.0352044
0.513786	0.485459	0.46907	0.294976	0	0	0.3137	0.643243	0.185072	0.554806	0.9	1	1	0.909091	0.0169781	0	0.107001	0.0955738		0.108676	0.264666	0.503533	0	0.565797	0.818546	0	0	0	1	0	0	0	0	0	0	0.064822	0.975296
0.101078	0.0601537	0.86983	0.250593	0.294487	0.118524	0.341396	0	0	0.105086	0.753761	1	0.790918	0.0558536	0.0730888	0	0.530422	0.114557		0.446421	0.555806	0.212043	0.0725895	0.211217	0.701752	0.443735	0.28287	0.915914	1	0.262118	0.0232965	0	0.202826	0	0.203879	0.431722	0.233111
0.114454	0.238507	0.289644	0.160725	0.474746	0.264705	0.207288	0.105189	0.0215422	0.49053	0.973925	1	0.641448	0.21992	0.226233	0.749332	0.594367	0.215255		0.832506	0	0	0	0	0	0	0.402664	0.573095	1	0	0.307116	0	0.99522	0	0	0.141248	0.202152
0.124155	0.0729229	0.0795663	0.00533587	0	0	0	0	0	0.159852	0.293459	1	0.0168219	0.116302	0.212141	0	0.0425913	0		0.351019	0.293801	0.502753	0.379524	0.769845	0.765145	0.507894	0.363502	0.981725	1	0.371321	0.217503	0.288987	0.0609301	0.126521	0	0.117392	0.754722
0.231438	0.086975	0.0365057	0.330702	0	0	0.0843939	0.06749	0.382191	0.689953	0	1	0	0	0	0	0	0.911603		0.345082	0.474129	0.99073	0.500402	0.352442	0.533366	0.170988	0.0890792	0.466682	1	0.287174	0.126649	0.0511849	0.228227	0.304918	0.0340087	0.322179	0.995301
0.318002	0.291961	0.217374	0.425723	0.993439	0.219587	0	0	0	0.274382	0.2	1	0.2625	0	0	0.167891	0	0.70907		0.420038	0.290926	0.115233	0.317432	0	0	0	0.105268	0.737238	1	0	0.00217286	0.405552	0.0250497	0	0.0453733	0	0.653319
0.113641	0.0554615	0.0689041	0.016602	0.0692543	0.083066	0	0	0.265741	0.988628	0.246914	1	0	0.233971	0	0	0.0392191	0		0.0631076	0.0390204	0	0.0117136	0.00404359	0.368344	0.713976	0.988473	0.110896	1	0.0408673	0.0143036	0.0316249	0.0316249	0.0566291	0.145348	0	0.10747
0	0.169921	0.0672867	0.418424	0	0	0.0507674	0.0230173	0.169615	0.363572	0.194809	1	0.649101	0.674292	0.732282	0.228644	0	0		0.00411034	0.0420705	0	0	0	0	0	0	0.783978	1	0	0	0	0.00562788	0	0	0	0.107515
0.281278	0.298583	0.0804203	0.0850084	0	0.692513	0.378628	0	0	0.0642423	0.652299	1	0	0.0632829	0	0.0958029	0	0.976749		0.399381	0.313592	0	0.902377	0.121361	0.341436	0	0	0.276772	1	0	0	0	0.0071959	0	0	0	0.281997
0	0	0	0	0	0	0	0	0	0.228605	0.590975	1	0	0	0	0	0	0		0.0350635	0.118294	0	0.145377	0.422858	0.283609	0.224043	0.0813167	0.42622	1	0.0861871	0	0.0436473	0.154825	0.476316	0.457377	0.643566	0.0788874
0.120579	0.0500791	0.100994	0	0	0.182186	0	0	0	0.0541561	0.698767	1	0.287225	0	0	0.0166318	0.044301	0.0647374		0	0	0	0	0	0	0	0.321787	0.982531	1	0	0	0	0	0	0	0	0
0.0394084	0.00158617	0.0265201	0	0	0	0.0308389	0	0.0814307	0	0.690503	1	0.260533	0.166037	0.0219936	0	0.0114515	0.00761227		0.273253	0.242477	0	0.319567	0	0	0	0.0432426	0.595544	1	0.32994	0	0	0.00638019	0	0	0	0.357602
0.0388947	0	0.202706	0.160628	0.158793	0	0	0.299387	0.0285146	0.139318	0.185267	1	0.137681	0	0.104033	0	0	0.116843		0.875145	0.0617397	0.0397046	0	0.335702	0.135423	0	0.591977	0.652488	1	0.206615	0.0518394	0.285584	0.00642539	0	0	0	0.418646
0.290128	0.829583	0.492662	0.625137	0.464027	0.441246	0.659465	0.812045	0.447878	0.906353	0.818379	1	0.76447	0.437017	0.532496	0.314859	0.0546277	0.042235		0	0	0	0	0	0	0	0	0.368266	1	0	0	0	0	0	0	0	0.0281082
0.330051	0.0481938	0.0674351	0.51064	0.380409	0.0193855	0.557332	0.474267	0.368292	0.560488	0.374851	1	0.24798	0.820181	0.783345	0.31727	0.381132	0.307991		0.876299	0.654837	0.0135722	0.0158328	0.151543	0	0.019281	0	0.296917	1	0.402733	0.204592	0.283835	0.0131912	0.0965817	0.0292217	0	0.0631196
0.052102	0.103707	0	0	0	0	0	0	0.78903	0.974358	0.496103	1	0.546268	0	0	0	0.32498	0.0329015		0.428222	0	0	0	0	0	0	0	0.232515	1	0	0	0	0	0	0	0	0
0.0729193	0.10729	0.243358	0	0	0	0	0.125413	0	0.102288	0.134443	1	0.206522	0	0.24955	0	0	0.0179031		0.180168	0.05593	0.0194823	0	0	0	0.267298	0.154575	0.492822	1	0	0	0	0.0503305	0	0.0283168	0	0.769317
0.140117	0.15888	0.286448	0.364984	0.409757	0.475089	0.225869	0.41062	0.313839	0.556064	0.328334	1	0.546291	0.0739397	0.00959756	0.0431193	0.0681514	0.0858573		0.439243	0.234484	0.00902493	0.154408	0.270173	0	0	0	0.321187	1	0.186396	0.210064	0.387539	0.172331	0.198995	0	0	0.120077
0.138547	0.375342	0	0	0.673673	0	0	0	0.0999186	0	0	0.32	1	0	0	0	0	0.903466		0.104976	0	0.00218168	0.0508123	0.109397	0.213951	0.0855805	0	0.362172	1	0	0	0	0	0.126208	0.0103539	0	0.207143
0.429535	0.190598	0	0.0303138	0.71732	0.0990772	0.308353	0.0257347	0	0.0525207	0	0	1	0.233333	0.0745896	0	0	0.0127006		0.0355058	0	0	0.0285299	0	0	0	0.3406	0.764257	1	0	0	0	0.0126508	0.0130563	0.00807721	0	0.0163929
0.073746	0.0338437	0.0102521	0	0.0167584	0	0	0	0.161178	0.0384389	0	0.8	1	1	1	0.6	0	0.00495193		0.760057	0.0235415	0	0	0	0	0	0.119282	0.132871	1	0.462471	0.755709	0.771812	0.102464	0.0686163	0	0.0529781	0.613158
0.25777	0.0837365	0	0	0	0	0	0.0526838	0.0430977	0.152909	0.226206	0.125	1	1	0.444444	0	0	0.279361		0.662836	0.0744874	0	0	0	0.14694	0.440821	0	0.966142	1	0.111927	0.0495485	0	0.266823	0	0.0139602	0.0469211	0.415238
0.107376	0	0	0	0	0	0	0	0.877103	0	0.769467	0	1	0	0	0	0	0		0.935176	0.0269307	0.00640723	0.0385791	0.443108	0	0	0	0.982729	1	0.0772697	0.0616158	0	0.0468374	0	0.0596677	0	0.613255
0.457349	0.12024	0	0.202822	0	0	0	0.0846131	0.145051	0.0194617	0.486989	0.10295	1	0.852902	0.215668	0.0262145	0.254801	0.365286		0	0	0	0	0	0	0	0	0.262948	1	0	0	0	0	0	0	0	0
0.132998	0	0	0	0	0	0.407855	0	0	0	0	0	1	0.84	0	0	0	0.040199		0.462352	0.00376867	0	0	0	0	0	0	0.774981	1	0.0299113	0	0.102412	0	0.022356	0	0.100041	0.381136
0.436556	0.789771	0	0	0	0	0	0.412481	0.383825	0	0	0	1	0.7	0	0	0	0		0.162522	0.218584	0	0	0	0	0.00600716	0.0277217	0.571579	1	0.00460562	0	0.138318	0.184533	0.129557	0.00364246	0	0.18383
0.413478	0.541904	0.862264	0.20759	0.654241	0.416335	0	0	0.568537	0	0.938972	0.706219	1	0.266952	0.326317	0.163158	0	0.17595		0.318828	0	0.0211894	0	0	0	0	0.0244029	0.311049	1	0	0	0.737675	0.0187612	0	0.0223276	0	0.0198567
0.0782234	0.0638535	0.323524	0	0.145786	0.196373	0	0.144781	0.201553	0.347648	0.983817	0.38018	1	0.438318	0.304684	0.661795	0.294131	0.0536844		0.0340228	0.310378	0.0667666	0	0	0.373137	0.559705	0.801248	0.286319	1	0.0384482	0.262697	0.267491	0	0.0591045	0.656951	0.0303296	0.0116035
0.0887053	0.35078	0.080437	0.136914	0.818513	0.142502	0	0.942203	0.728523	0	0.538851	0.591873	1	0.876953	0.0515115	0.900163	0.644569	0.704442		0	0.140695	0	0	0.341184	0.104615	0.627688	0.164992	0.309758	1	0	0	0	0	0	0	0	0.771134
0.139293	0.0827191	0.143399	0.396446	0.0104526	0	0.190446	0.356042	0.186495	0.243671	0.363004	0.433781	1	0.127399	0	0	0.0756881	0.0345874		0.286615	0.0565818	0	0.0186914	0.322027	0	0	0	0.801416	1	0	0	0.262435	0	0.56635	0	0.326936	0.211869
0.0665908	0.445557	0.199663	0.245567	0.214454	0.595675	0.158847	0.205192	0	0.257082	0.7	1	1	1	0.858787	0	0.153468	0.120934		0.718483	0.100112	0	0	0	0	0	0	0.710942	1	0.0157468	0	0.7453	0.0239065	0.123938	0.442705	0.851618	0.487665
0.0769625	0.0175997	0.380515	0.338024	0.0275759	0.552948	0.851313	0.761385	0.699662	0.602155	0.667678	0.917503	1	0.563425	0.29979	0.408589	0.10507	0.195336		0.126162	0.116876	0.00488723	0.333538	0.3794	0	0	0.179151	0.95733	1	0.041849	0.814521	0.814521	0.839132	0	0.0323239	0	0.319182
0.613723	0	0	0	0	0	0	0	0	0	0	0	1	0	0	0	0.996356	0.881029		0	0	0	0	0	0	0	0	0	1	0	0	0	0	0	0	0	0
0	0	0	0.788596	0.209097	0	0	0	0.193421	0.683168	0.85396	0.591416	1	0	0	0	0.365922	0.046908		0.254907	0.0284028	0.0416901	0	0	0	0	0	0	1	0	0	0	0	0	0	0	0
0	0.107374	0.657815	0.505496	0.777254	0.532441	0	0	0	0.0705164	0.812557	0.838347	1	0.700859	0.321275	0	0.479118	0.327155		0.17194	0.0107447	0.104443	0.447613	0	0	0	0	0.441728	1	0.310111	0	0	0	0	0	0.0226733	0.130966
0.385661	0.696754	0.781842	0.391874	0.325903	0.303698	0.382096	0.652508	0	0.810307	0.850261	0.683932	1	0.364128	0.00227177	0	0.0729811	0.27183		0.721871	0.0414702	0.00798922	0	0	0	0	0	0.649148	1	0	0	0	0	0	0.0298083	0.0868472	0.0318113
0	0.0225209	0.235604	0	0	0	0	0	0	0.0528637	0.751335	0.299714	1	0	0.0258796	0.467561	0.130679	0.147456		0.106129	0.0328941	0.0561636	0.259738	0.678017	0	0.0558204	0	0.600912	1	0.164017	0	0.048544	0.169845	0.181844	0.328623	0	0.0428727
0.343382	0.543702	0.290904	0.285831	0.0268831	0.205431	0	0.323179	0.508319	0.411233	0.199636	0	1	0.87982	0.183961	0.640039	0.256412	0.828		0.691142	0.237535	0.00330417	0.0395587	0.34077	0	0	0	0.547026	1	0	0	0	0	0	0	0	0.0216885
0.00396741	0.00227926	0.0145635	0.00261898	0	0	0.00490029	0.0406817	0.013484	0.0931842	0.473913	0.473913	1	0.552152	0.0372142	0	0.0685028	0.133082		0.223336	0.0600581	0	0	0	0	0	0	0.233333	1	0	0	0	0	0	0	0	0
0.0813504	0.0331116	0.304148	0.0744913	0.0220537	0.0912378	0.297219	0.371001	0.0243446	0.07983	0.340984	0.319241	1	0.428377	0.102437	0.0431208	0.012389	0.103865		0.285471	0.0434802	0	0.476692	0	0	0.226815	0	0.514959	1	0.724935	0.0951921	0	0.226379	0.801658	0.0356994	0.502808	0.0785792
0.0715651	0.0283185	0.00801919	0.0373563	0.0250154	0.00562228	0.0525348	0	0.0149586	0.0402526	0.236727	0.596418	1	0.18444	0.039903	0.133074	0.0111567	0.212319		0.0876766	0	0	0	0	0	0	0	0.569307	1	0	0	0	0	0	0	0	0
0.054811	0.313509	0.48551	0.0493881	0.134505	0	0	0.266398	0	0.485447	0	0	1	0.65625	0	0	0.540632	0.7837		0.00573826	0	0	0	0	0	0	0	0.477377	1	0.901429	0.643878	0	0	0	0	0	0.00208785
0.0933512	0.0956104	0	0.0172602	0.0877371	0	0	0.235268	0.00717926	0.0121561	0.320374	0.478614	1	0.425172	0.0424682	0	0	0.0160594		0.121509	0.134804	0.155231	0.0880495	0.292349	0	0	0	0.245921	1	0.11116	0	0	0.141762	0.261521	0	0.155395	0.443293
0.951149	0	0.0111433	0.213754	0.359997	0	0	0.248544	0.896045	0.281539	0.898725	0.0544723	1	0	0.00442111	0.21289	0.0487188	0.378591		0.335052	0.153981	0.554797	0.528104	0	0	0	0.651449	0.813352	1	0.826113	0.118016	0	0	0	0	0	0.222592
0.107145	0.133392	0	0	0	0.253766	0.533153	0.242077	0	0	0	0.331165	1	0.370968	0.2197	0.3007	0.138042	0.0159478		0.268948	0	0.290383	0.308241	0.186598	0.670275	0.511921	0.429671	0.676738	1	0.649932	0.171266	0	0	0.438301	0.474826	0.0664756	0.108505
0.65243	0.790939	0.128256	0.323087	0	0	0.21038	0.0673217	0.0735405	0.218511	0.481401	0.278169	1	0.240408	0.0271143	0.0409568	0.0246837	0.148197		0.157185	0.0294749	0.283096	0.00412404	0.0314927	0	0	0.147996	0.367766	1	0.575671	0	0	0	0	0.220186	0	0.497574
0.00566462	0.352918	0.379506	0.328045	0.922355	0.95406	0.601312	0.323092	0.726814	0.85316	0.44919	0.945359	1	0.459837	0.0830088	0.343119	0.81022	0.475745		0.527859	0.0755529	0.127391	0.157366	0	0	0	0	0.542762	1	0.0553783	0.0742942	0.308233	0.0536057	0.304177	0.341424	0	0.87804
0.181257	0.172005	0	0	0.279848	0.394054	0.378596	0.050586	0.173702	0.850894	0.827245	0.759976	1	0.649839	0.347199	0.354207	0.137825	0.331687		0.0881648	0	0	0	0	0	0	0	0	1	0	0	0	0	0	0	0	0
0.216682	0.154455	0	0	0.337882	0	0	0	0.536746	0	0	0	0.25	1	0.52381	0	0	0.0452695		0.730605	0.137695	0.278379	0	0.465809	0.258783	0	0	0.0620685	1	0.0108424	0	0	0	0	0	0	0.771262
0.274805	0.0738221	0.0242919	0.106708	0.573127	0.18523	0.929361	0.552445	0.82701	0.0660206	0.623032	0.0920287	0	1	0.85717	0.0101363	0	0		0.261999	0	0	0.0286444	0.25157	0.579159	0.499357	0.915071	0.643736	1	0.538706	0.0701282	0	0	0.493041	0.534128	0.17958	0.0976074
0.246907	0.0938086	0	0	0	0	0	0	0.18209	0.3081	0.354356	0	0	1	0.666667	0	0	0		0	0.073016	0.293668	0.47989	0.364533	0.39785	0.618284	0.415757	0.074869	1	0.823011	0.93383	0.307839	0.325911	0.298672	0.182235	0.0229266	0
0.248993	0	0	0	0	0	0	0	0	0.169178	0	0	0.357143	1	0	0	0	0.393329		0.0693081	0.242763	0.402029	0.325254	0	0	0.449812	0.460314	0.858296	1	0.136425	0	0.114395	0.299433	0.0520985	0.0486861	0.32963	0.441424
0.423003	0	0	0	0	0	0	0	0	0	0	0	0	1	0.625	0	0	0		0	0.862839	0.0665345	0.311428	0.705761	0.35288	0	0.0434935	0.670187	1	0.112442	0.602737	0	0	0.646683	0.303076	0.609051	0.472455
0.0202962	0	0	0	0.320805	0	0	0	0.249204	0	0.504412	0.924756	0.924756	1	0.132108	0	0	0.0519134		0.00611665	0	0.0023214	0.13117	0.0202578	0	0.00865793	0.0230036	0.647229	1	0.261934	0	0	0	0.0243005	0.119226	0	0
0.581033	0	0	0	0	0	0.14309	0	0	0.131579	0	0	0.365192	1	0.616191	0	0	0.0154871		0.0770266	0.151069	0.0118715	0	0.0775324	0.0822664	0.0580091	0.00121539	0.151637	1	0.747959	0.663098	0.13947	0.0514933	0.143031	0.0174955	0.0455241	0.0345321
0.425583	0.189784	0.0643433	0.0145331	0	0	0.263757	0.189497	0.143195	0	0	0	0.629384	1	0.401657	0	0.706949	0.368748		0.00589596	0	0.00441768	0.134883	0.0890951	0.0617696	0.027098	0.063659	0.657741	1	0.211446	0	0	0.0182718	0.0140421	0.00598318	0	0
0.0125826	0.105589	0.0574205	0.1423	0.039762	0.162583	0.0572276	0.0714668	0.422833	0.176444	0	0	0.62658	1	0.311207	0.219419	0.228927	0.0878198		0.196586	0.133066	0.0245654	0.146786	0.210878	0.026417	0.135938	0.261365	0.292313	1	0.62328	0.211958	0.13132	0.263593	0.199976	0.30233	0.445054	0.555453
0.0482373	0.0944046	0.144479	0.366133	0.0260324	0	0	0	0.0556513	0	0.256969	0.1454	0.562992	1	0.240334	0.126064	0.0211471	0.192732		0	0	0.0380729	0.0486095	0	0	0.00532119	0	0.0325941	1	0.018314	0.119164	0.320612	0.357413	0.523656	0.381329	0.391297	0.0910659
0.367417	0.0547032	0	0	0.111804	0	0	0	0.0478671	0.028852	0	0	0	1	0.72748	0.617769	0.026415	0.238422		0	0	0.0200718	0.157864	0.50536	0.721348	0.00552353	0.495299	0.852035	1	0.250966	0.637654	0.818421	0.676486	0.0680833	0.74943	0.196235	0.0497936
0.0410836	0.167274	0	0	0.0335807	0	0.050297	0	0.0772469	0	0	0	0.185363	1	0.547813	0.650483	0.532609	0.12468		0.220683	0.26576	0.381251	0.123767	0.342903	0	0.011317	0.0232524	0.246948	1	0.295351	0.0259532	0.228145	0.684434	0	0.525151	0.19735	0.673635
0.0109664	0.0681402	0.18253	0.0343331	0.00897991	0	0	0	0	0.0712467	0.495473	0.544492	0.923437	1	0.475914	0.304922	0.0176774	0.351644		0.0933398	0	0.0309019	0.0754678	0	0	0	0.237348	0.628927	1	0.068122	0	0	0.0658163	0	0	0.109058	0.0583162
0.115409	0.0935566	0.658964	0	0.0509277	0	0.127365	0	0	0	0.408426	0.490111	0.732849	1	0.613904	0.522199	0.678037	0.21282		0	0	0	0	0	0	0	0.705064	0.715521	1	0	0	0	0	0	0	0	0.430244
0.0769734	0.146376	0	0.0129376	0.12129	0	0	0	0	0.221025	0	0	0	1	0	0	0	0.845507		0.0110623	0	0	0	0	0	0.0145208	0.0291749	0.427693	1	0.0596484	0.0327881	0	0	0	0	0	0
0.0800817	0.0268041	0.0413135	0	0	0.111092	0	0	0.283061	0.115359	0	0	0	1	0	0.548288	0.0509955	0.222109		0.033113	0	0.0690966	0.0550081	0.3495	0.660789	0.887986	0.502774	0.587013	1	0.292308	0.623429	0.53556	0	0.267046	0	0	0
0.154724	0.468323	0.284316	0.676482	0.908938	0.225961	0.0154264	0.0375322	0.258848	0.238954	0.107297	0	0.948666	1	0	0	0	0.119053		0	0	0	0	0	0	0	0	0.920436	1	0.347473	0	0	0	0	0.418181	0.040641	0
0.463691	0.133855	0.279662	0.452274	0	0.0659283	0.0299166	0	0	0.231017	0	0	0	1	0	0	0	0.0428028		0.47798	0.231347	0.435492	0.0444733	0.171952	0	0.0144085	0.0260619	0.268014	1	0.0885927	0.199774	0	0	0	0	0	0
0.244457	0	0.269913	0.720428	0.958497	0	0	0	0.0278216	0	0	0	0.397783	1	0	0	0	0.963432		0	0	0	0.0238026	0	0	0.00342262	0.107397	0.463175	1	0.252009	0	0	0	0	0	0	0
0.450556	0.184519	0.433043	0.409562	0.331921	0	0.157324	0.210763	0.0490595	0.979317	0.171173	0.252076	0.886462	1	0.32882	0.664228	0.605701	0.377016		0.0307932	0	0	0	0	0	0	0.0321331	0.545784	1	0.258518	0	0	0	0	0	0	0.0766088
0.462037	0.791636	0.340739	0.356663	0	0.010876	0.131941	0.256297	0.0435412	0.419796	0.907968	0.460416	0.047529	1	0.960902	0.326797	0.412146	0.0335852		0.0468946	0.0359666	0.331812	0.557268	0	0.0959109	0.647625	0.525425	0.347311	1	0.384889	0.130467	0	0	0.255375	0.0752434	0.467347	0.231132
0.179113	0.0872269	0.0322367	0.0278223	0.339799	0.403251	0.221007	0.140249	0.228475	0.566438	0.507099	0.461178	0.866548	1	0.234538	0.0965218	0.0423292	0.385036		0.0203084	0	0.0540937	0.160461	0.194782	0.183192	0.0241799	0.132014	0.368164	1	0.642479	0.184349	0	0	0.0583093	0	0	0.181925
0.0201439	0.0718582	0.0284813	0.201123	0.0794543	0.201714	0.277996	0.11889	0.10816	0.221331	0.0257657	0.0207653	0.357794	1	0.331006	0.292327	0.0420833	0.0812329		0.711753	0	0.410513	0.0580468	0	0.352008	0.244779	0.247824	0.394078	1	0.438814	0	0.122352	0.359793	0	0.0909627	0	0
0.0276937	0	0	0.364222	0.0166615	0.279995	0.503277	0.527472	0.409017	0.146482	0.00598205	0	0.223095	0.557737	1	0.557737	0.726684	0.505741		0.0180091	0.0775683	0.063007	0.060281	0.0244024	0.0693542	0.00145996	0.372104	0.884968	1	0.441442	0.118786	0.187786	0.186237	0.115157	0.00946356	0.0782178	0.0322739
0.214825	0.320595	0	0	0	0	0	0.535517	0.842458	0.705225	0.352981	0	0	0	1	0.965859	0.479282	0.300862		0.0911461	0.681352	0.886453	0.360273	0	0	0	0.431973	0.59834	1	0.229115	0.477993	0	0	0	0	0	0
0.211203	0.290352	0.139043	0.0390293	0.195146	0.240871	0.0518001	0.0843066	0.386295	0.342454	0.702617	0.454969	0.102318	0.525245	1	0.206648	0.240075	0.247225		0	0	0.101323	0.367669	0.128664	0.230413	0.157257	0.264582	0.353723	1	0.526385	0.495136	0.323991	0.0493367	0.0367025	0	0.144146	0.0162036
0.0885858	0	0	0	0	0	0.689209	0.104966	0.173732	0.746526	0	0	0	0	1	0	0	0.720582		0.0846437	0	0.151962	0.242414	0	0	0.0475632	0.355191	0.705601	1	0.107281	0.118605	0	0	0	0	0.23811	0.0880828
0	0	0	0	0	0	0	0	0.325236	0.287956	0	0	0	0	1	0	0	0.218027		0.251025	0	0	0	0	0	0.781491	0.486749	0.216327	1	0.926651	0.518621	0.555052	0	0	0	0.419045	0.359182
0.103571	0	0	0.27118	0.698065	0.876553	0.850091	0.339583	0.217947	0.358808	0.554508	0.00681173	0	0.486967	1	0.742722	0.200579	0.2214		0.37007	0	0.505933	0.438475	0.0424969	0.195743	0.0948136	0.61517	0.390036	1	0.0172046	0.0221219	0.295963	0.394154	0.0416134	0	0.0398472	0.314775
0	0	0.688904	0.520568	0	0	0	0	0	0	0.160329	0.0150121	0.0160941	0.627672	1	0.333345	0	0		0.419964	0	0.0538523	0.898475	0.064943	0.313838	0.157742	0.148651	0.365206	1	0.545751	0.332567	0.370038	0.339052	0.0509688	0.211736	0.279472	0.117146
0.273472	0.0144234	0.177901	0.0309979	0	0.129846	0.10184	0	0	0	0	0	0.0778811	0.192756	1	0.486963	0.0741874	0.274951		0.8447	0	0.977837	0	0	0.0425918	0.0488231	0	0.286825	1	0.00733812	0.0475099	0	0	0	0	0	0
0.100186	0.23811	0.323302	0.376977	0	0	0.218385	0.173936	0.500994	0.027367	0.395667	0.791334	0.791334	0.895667	1	0.801039	0.513999	0.0931421		0.355723	0	0.132629	0.425719	0.182778	0.67433	0.322921	0.0215438	0.357533	1	0.601124	0.260478	0	0	0.224589	0.197715	0.633893	0.120211
0.104299	0.90369	0	0.00673922	0.451528	0.0338646	0	0	0	0	0	0.615035	0.615035	0.697142	1	0.630311	0.0660198	0.325661		0.12587	0	0	0	0.15885	0.0149548	0.119803	0.279695	0.756123	1	0.591746	0.0582601	0	0.272375	0	0	0	0.114427
0.084534	0.19211	0	0.502942	0.720002	0.2701	0	0	0	0.101219	0	0.320941	0.320941	0.621565	1	0.394033	0.101757	0.0532767		0.162235	0.0647103	0.140206	0.0580408	0.144351	0.206206	0.129123	0.439401	0.959288	1	0.331032	0.059025	0.115194	0.29313	0.258222	0.227359	0.322839	0.0864193
0	0	0	0	0	0	0	0	0	0.37389	0.641984	0.641984	0.641984	0.723053	1	0.660037	0	0.050641		0.535631	0	0	0.448087	0	0	0.114782	0.425462	0.446514	1	0.0416613	0.376891	0.299712	0.0903893	0	0	0.341187	0.374975
0.0242254	0.436252	0.0650817	0.238861	0.32773	0.556817	0.820824	0.424402	0.282547	0.21941	0.512194	0.232309	0.314862	0.942798	1	0.556087	0.0715695	0.0564598		0.120946	0	0	0	0	0.201939	0.0123661	0.0344557	0.0366601	1	0	0	0	0	0	0	0.0587016	0
0	0	0	0	0	0	0	0	0	0	0	0	0	0	1	0	0.519527	0.406781		0.495674	0	0	0.102744	0.00895145	0	0	0	0.22156	1	0.262455	0	0	0	0	0.0450456	0.143121	0.133904
0.0280947	0.208283	0.594068	0.148704	0.227203	0	0	0.0715276	0.706666	0.193254	0	0	0	0.458333	1	0.0526316	0.232785	0.0202181		0.397451	0.911357	0.15239	0.497957	0.304299	0	0.337025	0.951197	0.807458	1	0.82578	0.586813	0.316759	0.960723	0.432918	0.161446	0.123775	0.20314
0.188306	0	0	0	0	0	0	0	0.738024	0.383748	0.56885	0	0	0	1	0.328219	0.0201263	0.504406		0.0843002	0.173544	0	0.114458	0.128572	0.806738	0.476033	0.0313846	0	1	0.340323	0.136939	0	0.419997	0.701736	0.366859	0.217598	0.044066
0.168254	0.0158948	0.153998	0.374049	0	0.143747	0.102764	0	0.278329	0.0550379	0	0	0	0.372194	1	0	0	0.750286		0.161895	0.306952	0.342842	0.584837	0.163349	0.795471	0.172312	0.207786	0.0468202	1	0.523376	0.397644	0.0242726	0.170293	0.0118249	0.17005	0	0.444766
0.532532	0.464817	0.33573	0.442033	0	0	0	0.472002	0.0295024	0.399566	0.860513	0.983026	0.0576081	0.580478	1	0.50241	0.155878	0.100089		0.111851	0.0723812	0.300248	0.0908595	0	0.257304	0.0231493	0	0.0768837	0.791284	1	0.190909	0.281513	0	0	0	0.0738408	0.0151328
0.0142898	0.801862	0.445632	0.416387	0.161418	0.0611473	0.585995	0.636782	0.712803	0.602547	0.0874112	0.138951	0.0280635	0.927038	1	0.366078	0.345604	0.477387		0.317536	0.260389	0.601832	0	0	0.125057	0	0.43881	0.239361	0.143974	1	0.245455	0.416699	0	0	0	0.191615	0.0310177
0.204781	0.036561	0	0.0402341	0.0300356	0.0411681	0.141697	0.111923	0.210689	0.752337	0.343496	0.0511904	0.0837729	0.0517647	1	0.882787	0.572265	0.578978		0.231899	0.347767	0.446501	0.400165	0.0609125	0.950793	0.0566006	0.298717	0.17273	0.280858	1	0.23374	0.476322	0.10325	0.262586	0.0844465	0.238232	0.0640164
0.525497	0.249365	0.341925	0.511266	0	0.0506144	0.0435559	0.4868	0.00189905	0.483191	0.602247	0.819291	0.127152	0.898517	1	0.522033	0.2319	0.0741663		0.264246	0.110547	0.835398	0.561202	0.680716	0	0	0.0500358	0.276563	0.878615	1	0.547955	0.151246	0.0301482	0.429254	0	0.351239	0.199524
0.306657	0.200372	0.39596	0.31561	0.456813	0.293105	0.258193	0.0274585	0.114471	0.0715467	0.0348136	0	0.601598	0.958289	1	0.975389	0.246593	0.0936066		0.435657	0.733476	0.894723	0	0	0.122132	0	0	0.354733	0.218103	1	0.21039	0.756242	0	0	0	0.0797802	0.0183887
0.379103	0.258109	0	0	0.0902815	0.108338	0	0	0.785296	0.439322	0	0.254326	0	0	0.60639	1	0.0670369	0.172279		0.190583	0.108455	0.449888	0.00535581	0	0.181793	0	0.084551	0.139481	0.318165	1	0.190909	0.462035	0	0.0257557	0.0970791	0.129333	0.0204576
0.147797	0	0	0	0	0	0	0.907831	0.79315	0	0	0	0	0	0.341405	1	0.797396	0.748994		0.495469	0.950141	0.505738	0.113007	0.999933	0.499967	0.104398	0.596624	0.738641	0.631558	1	0	0	0	0	0	0.129921	0.378615
0.129473	0	0	0.772535	0	0	0	0	0	0	0	0	0	0	0	1	0.442202	0.200191		0.0910388	0.435593	0.0563221	0.341955	0.0658862	0.0588844	0.258481	0.0757258	0.135472	0.446587	1	0.0706008	0	0.0389638	0	0	0	0.123519
0	0	0	0	0	0	0	0	0.170795	0	0	0	0	0	0	1	0.888889	0.558575		0.00681774	0.634939	0.411041	0.244315	0.0943458	0.0681779	0.340531	0.00498509	0.114923	0.221904	1	0	0.0335767	0.0066078	0	0	0	0.0836592
0.464685	0.175293	0	0	0	0	0	0	0	0.26539	0.349773	0	0	0.875	1	1	0.663331	0.340332		0.0866129	0.0693104	0	0.215166	0.13813	0.565869	0.278337	0.00183431	0.297501	0.616064	1	0.370823	0.0713875	0.234888	0.09106	0	0.0310678	0.110065
0.13119	0.832453	0.175694	0.10782	0.270162	0.506489	0.168158	0.0105523	0.0460369	0.678305	0.424407	0	0	0	0	1	0.0176246	0.734295		0.017989	0	0	0	0.243938	0.216197	0	0	0.234325	0.548538	1	0	0.110433	0.00821046	0	0	0.712122	0.491256
0.250095	0.230467	0.387924	0.390215	0	0.131465	0.165123	0.0444695	0.291589	0.58652	0.287765	0.432814	0.348204	0.261371	0.0583627	1	0.306881	0.185032		0.0611693	0.0134986	0.409504	0.275394	0.83883	0	0.789312	0.0734082	0.0924721	0.432004	1	0	0	0.00757912	0.261019	0.345502	0	0.016293
0	0	0	0	0	0	0	0.0768784	0.216829	0.0866557	0	0	0	0	0	1	0.434568	0.0718749		0.352238	0.361354	0.0192344	0.191736	0.874663	0.743841	0.334548	0.314302	0.0486327	0.353311	1	0.333727	0.238071	0.858642	0.304625	0.715398	0.984495	0.121582
0.065769	0	0.660748	0.266431	0	0	0	0	0	0	0	0	0	0	0	1	0	0.394526		0.664164	0.1012	0	0.0085767	0.130708	0.0929807	0.13894	0.503472	0.0983957	0.0731394	1	0.570372	0.156573	0.0175478	0	0	0.0237181	0.0700131
0.0385767	0	0	0.243734	0.133421	0.0121358	0	0	0	0.455722	0	0	0	0.0306692	0.254509	1	0.623985	0.348787		0.897118	0	0	0	0.599526	0.211727	0.421483	0.0884981	0.686062	0.362903	1	0	0	0.0723171	0	0	0	0.434257
0.0327697	0	0	0.0958245	0.348175	0.404674	0.410361	0.374241	0.216318	0.1132	0.313423	0.305286	0.225225	0.721831	0.655254	1	0.432573	0.250025		0.242603	0	0	0	0.850521	0.868987	0	0	0.362889	0.312825	1	0.222222	0	0.0398791	0	0	0	0.509729
0.0910546	0	0.415834	0.02588	0.121348	0.814999	0.814999	0.921815	0.581424	0.517395	0.950942	0.639532	0.695084	0.413987	0.551983	1	0.626213	0.044359		0.254695	0.594987	0.506082	0.183826	0.702929	0.0596949	0.504812	0.519474	0.132369	0.703174	1	0.554461	0.378172	0.160073	0.352879	0.324157	0.131874	0.24791
0	0	0	0	0	0	0	0	0	0	0	0	0	0	0.0707957	1	0.492729	0.0438544		0.159405	0.276671	0.043501	0.0438446	0.258488	0.137455	0	0	0.274405	0.975203	1	0	0.132021	0.0347181	0.556953	0.518558	0	0.378076
0.296419	0	0.0774053	0.132421	0.090013	0	0	0	0	0.0534439	0	0	0	0.495826	0.661101	1	0.990284	0.898832		0.20656	0.605689	0.644802	0.0239668	0.0764656	0.0616243	0.0873011	0	0.160972	0.898036	1	0.0376942	0.174001	0.0852492	0.26352	0.841901	0.278977	0.320663
0.718643	0.184592	0	0	0.0497296	0.556069	0.0872009	0	0	0.134965	0	0	0.797193	0.755097	0.362603	1	0.483901	0.132999		0.0433465	0	0.0630463	0	0	0	0	0	0	0.109771	1	0	0	0	0.272046	0.173696	0.700123	0.425106
0	0	0	0	0	0	0	0	0	0	0	0	0	0	0.0563732	1	0.344687	0.24216		0.217569	0.403479	0.484211	0.0378835	0.265906	0.0358955	0.242991	0.337334	0.046403	0.131801	1	0.678011	0.64349	0.0804612	0.224283	0.0194527	0.0331538	0.133025
0.0441923	0.072165	0.2104	0.0827376	0	0.036292	0	0	0	0.0190189	0	0.0867635	0.2386	0.17922	0.861682	1	0.49762	0.0507964		0.0571716	0.0282949	0	0.151703	0	0	0	0	0	0.383333	1	0.6	0	0.184936	0.660241	0.493089	0	0.112935
0.142028	0.0779399	0	0	0.146051	0	0	0	0	0	0	0	0	0	0.321824	1	0.976861	0.0520709		0.510755	0	0.309364	0.77341	0	0	0.292052	0.230304	0	0.487626	1	0.255589	0	0	0.16892	0.450455	0.0788296	0
0.129658	0.0261862	0.133082	0.489402	0.10076	0.125138	0.0631623	0.0953666	0.0684973	0.0774237	0.638538	0.82739	0.171115	0.0289574	0.707677	1	0.915956	0.0674336		0.179313	0	0	0	0	0	0	0	0	0.717437	1	0.220768	0.114146	0.237804	0	0	0	0.129298
0.338384	0.984085	0.459103	0.384254	0.0384816	0.329308	0.2641	0.0960175	0.30224	0.689202	0.0398974	0	0.233366	0.519644	0.342812	1	0.0992141	0.00506788		0.0370708	0.422587	0.0431209	0.291736	0.244079	0.0689467	0.0518273	0.286086	0.0194948	0.314183	1	0.947185	0	0	0	0.322039	0.173553	0.364189
0.451574	0.832805	0.0952958	0.0904515	0.412216	0.227086	0.477128	0.433029	0.843339	0.925459	0.0574552	0.101422	0.343184	0.350377	0.262658	1	0.522842	0.991031		0.526679	0.0288964	0.09766	0.456743	0	0	0.274425	0.141079	0.513642	0.805328	1	0.393656	0	0.103206	0.785283	0.537842	0.235637	0.131641
0.247362	0.252632	0.15676	0.464671	0.24421	0.102819	0.105905	0.0153382	0.193477	0.33895	0.920941	0.603137	0	0.0141473	0.566874	1	0.980832	0.104922		0.0315133	0.154768	0.102559	0.255839	0	0	0.318394	0.376615	0	0.538065	1	1	0.139394	0	0	0	0	0.188206
0.0529677	0.0165309	0.038943	0.0892844	0	0.00982862	0	0	0.126523	0.3103	0	0	0	0.0933193	0.366357	1	0.171882	0.118257		0.827472	0.381903	0.17087	0.0277358	0.563636	0.400137	0.259093	0.170286	0.155925	0.693844	1	0.499655	0.112804	0.299458	0.26698	0.154906	0	0.177959
0.254415	0.0148168	0.0815879	0	0	0.354761	0.102092	0.0783406	0.206099	0.181703	0.0142901	0	0	0	0.30802	1	0.862148	0.70779		0.716922	0.165913	0.465037	0.94783	0.446179	0.361322	0.6537	0.439522	0.356443	0.354174	1	0.649049	0.112323	0.148049	0.856269	0.706011	0.100045	0.0242882
0.0374879	0.538436	0.225578	0	0	0	0	0	0	0.299086	0.790395	0.0288368	0	0	0.0311107	1	0	0.687675		0.222742	0.260235	0.265489	0.0674791	0.232525	0.864296	0.140015	0.0703478	0.249713	0.637081	1	0.446164	0.0467939	0	0.116806	0.0461568	0.708372	0.821441
0.0955333	0.240073	0.048791	0.0972279	0	0	0	0.0589801	0.417286	0.390616	0.0241691	0	0	0.0928015	0.661156	1	0.521146	0.816046		0.288276	0.97189	0.66658	0.996399	0.677264	0.127254	0.242613	0.0545013	0.115331	0.515633	1	0.840362	0.65558	0.364659	0.0791438	0.121942	0.0114152	0.00880542
0.153933	0.229184	0.310073	0.7369	0.364495	0	0	0	0.208569	0.176415	0.322125	0	0	0	0.252738	1	0.282763	0.672238		0.103572	0.648442	0.484254	0	0	0	0	0	0.278505	0.187296	1	0	0.129822	0	0	0.463683	0.262676	0
0.491232	0	0	0.171827	0.0695116	0	0	0.533855	0.432198	0.321224	0.365248	0.0448116	0.690481	0	0.0821196	1	0.157952	0.124425		0.0421641	0.297766	0.294542	0.055002	0.0436579	0.164713	0.368775	0.251052	0.397602	0.198036	1	0.825119	0.220413	0.0298059	0.39029	0.757867	0.196449	0.563162
0.457608	0.178261	0	0.618874	0.412582	0	0.262129	0.0765911	0.308488	0.382712	0	0	0	0	0.0961669	0.954053	1	0.464266		0.26041	0.899388	0.677195	0.12205	0.0361254	0.0313778	0.104762	0.330125	0.236158	0.649181	1	0.335151	0.293175	0.643744	0.313166	0.651146	0.273342	0.157514
0.805396	0.586921	0	0	0.504132	0.302479	0	0	0.308291	0	0	0	0	0	0	0	1	0.49834		0.535507	0.0498287	0.335495	0.116588	0	0	0.207448	0.297391	0.11407	0.542162	1	0.591085	0.143494	0.423856	0.562533	0.642514	0.0569358	0.923769
0	0	0	0	0	0	0	0	0	0	0	0	0	0	0	0.833333	1	0.102253		0.0455912	0.0389887	0.111917	0.107528	0.53764	0.141527	0.170606	0.669923	0.533224	0.786946	1	0.553764	0.604007	0.98929	0.227081	0.328096	0.067027	0.29523
0.707216	0	0.0458784	0.0342936	0	0	0	0.0229884	0.844197	0.269376	0.397538	0.35471	0	0	0	0.0192052	1	0.189579		0	0	0.492585	0.136308	0	0	0	0.222693	0	0.766971	1	0.736377	0	0	0	0	0	0.401542
0.0271088	0.282053	0	0	0	0.748175	0.536636	0	0.713683	0.232019	0	0	0.610102	0.118631	0	0.3	1	0.32541		0	0	0.193432	0.361359	0.104676	0.38488	0.938119	0.484054	0.91418	0.765931	1	0.0105632	0.177138	0.0387605	0.0279076	0.0183592	0.0253867	0.288193
0.0233384	0.263664	0.121163	0.0162853	0	0	0	0.0146103	0.432319	0.113248	0	0	0	0	0.141899	0.149235	1	0.174854		0.123211	0.133027	0.0780603	0.0589645	0.123803	0.464101	0.495402	0.740993	0.547869	0.831076	1	0.872529	0.669468	0.408722	0.235213	0.540718	0.277547	0.120785
0.220598	0.070628	0.184416	0.0621515	0	0	0	0.0317836	0.297063	0.268079	0	0.648165	0.868023	0.992026	0.924229	0	1	0.388806		0.0180952	0.029201	0.220002	0.0433365	0	0.0390122	0.0173866	0.0520113	0.0632016	0.167974	1	0.944962	0.414733	0	0	0.0299073	0.151201	0.0509969
0	0	0.273597	0.420909	0.267112	0.400668	0	0.0338764	0.176514	0.0795223	0	0	0	0	0	0.145256	1	0.15186		0.0591366	0.414705	0.525637	0.409833	0.8775	0.221689	0.218341	0.0390861	0.429093	0.783686	1	0.656753	0.170964	0.103842	0.205254	0.15943	0.248072	0.0492851
0.328945	0	0.697041	0.280162	0.256574	0	0.17091	0.145563	0.00960242	0.208788	0	0	0	0	0.247998	0	1	0.318086		0.124377	0.022391	0.0326656	0.0712255	0.132072	0.431028	0.773194	0.924153	0.440968	0.442433	1	0.506917	0.489832	0.414233	0.436338	0.316361	0.131621	0.856192
0	0	0	0	0	0	0	0.0234669	0.779104	0.149154	0	0	0	0	0.142213	0	1	0.656541		0	0	0	0	0	0	0	0	0	0.245651	1	0.683125	0.103418	0	0	0	0	0
0.272036	0.423505	0.264306	0.0978527	0	0	0.4338	0.363859	0.786086	0.178011	0	0	0	0	0.110258	0	1	0.222718		0.583587	0.972012	0.592527	0.113231	0.989568	0.792683	0.683566	0.491433	0.718619	0.436683	1	0.701457	0.817561	0.231617	0.624327	0.696216	0.102141	0.570585
0.546336	0.232182	0.0410216	0	0	0	0.00848564	0.485848	0.755216	0.161699	0.164716	0	0	0.0252481	0	0.273596	1	0.174721		0.218477	0.0610853	0	0	0.0403913	0.145786	0.178402	0.117814	0.211004	0.408623	1	0.365033	0.301181	0.326589	0.635507	0	0.75315	0.24677
0.472362	0.602546	0.273263	0.33901	0.363744	0.47369	0.718523	0.681091	0.9055	0.973577	0.546384	0.397451	0.476185	0.468363	0.351694	0.593948	1	0.975079		0.194159	0.388227	0.136333	0.435553	0.407486	0.334953	0.181459	0.0905587	0.231258	0.153275	1	0.653286	0.571351	0.779793	0.750621	0.0498381	0	0.0127721
0.286483	0.310087	0.247882	0	0	0	0.302569	0.168397	0.237478	0.825535	0.441968	0	0	0	0.203319	0.121991	1	0.29493		0.087116	0.100632	0.126882	0.0582902	0.274057	0.205208	0.124306	0.0383858	0.0127171	0.484692	1	0.789788	0.381566	0.274741	0	0	0.252578	0.072638
0.338731	0	0	0	0	0	0	0	0	0	0	0	0	0	0	0	1	0.0754982		0.938847	0.0427093	0	0	0.703257	0.398285	0.0813289	0.0365449	0.218775	0.0850019	1	0.299631	0.132706	0.446605	0.0958541	0.670979	0.120855	0.107793
0.455789	0.329119	0.68132	0.569403	0.428087	0.20214	0.0856418	0.338449	0	0.194208	0.0263679	0.102369	0	0	0.0185358	0.226101	1	0.219498		0.919008	0.967737	0.253052	0.197929	0.252175	0.206445	0.400857	0.617738	0.194347	0.610419	1	0.285347	0.587083	0.554166	0	0.698106	0	0.781385
0.00848109	0.2495	0.649116	0.647889	0.801992	0.632341	0.469018	0.290764	0.274244	0.214691	0.447583	0.212315	0.29724	0.0349694	0.223163	0.412429	1	0.0879701		0	0	0	0.187957	0.0684865	0.127811	0.120895	0.677291	0.318025	0.204045	1	0.551438	0.417301	0.00309141	0	0	0.46354	0.086717
0.277589	0.482351	0.886377	0.858035	0	0	0	0	0	0	0	0	0.0944679	0	0.113664	0	1	0.364833		0	0	0	0	0	0.1766	0	0	0.132624	0.967949	1	0.206238	0	0	0	0	0	0
0.21725	0.264846	0.261366	0.581032	0.588031	0.304927	0.203285	0	0.270776	0.310237	0.143661	0.196011	0.481167	0.406229	0.181415	0.00421894	1	0.737228		0.388936	0.850821	0	0	0	0	0	0	0	0.511097	1	0.163391	0	0.364068	0	0	0.4216	0.028227
0.100731	0.420678	0.200977	0.130249	0	0	0.458555	0.358496	0.217166	0.151685	0.338346	0.36022	0.295895	0	0.0295016	0.400531	1	0.553832		0.598587	0.465195	0.481966	0.707249	0.968093	0.494354	0.396751	0.66062	0.404023	0.453743	1	0.304308	0.0403832	0.187068	0.86253	0.880958	0.923238	0.729475
0	0	0	0.022937	0.344494	0	0	0.761501	0.678191	0	0	0	0	0	0.103338	0.644549	1	0.80741		0.97655	0	0	0	0.245091	0	0.187134	0.107362	0.0641696	0.221366	1	0.278184	0	0	0	0	0.230033	0.539449
0.93837	0	0	0	0.144001	0	0	0	0	0.0615546	0.266737	0.266737	0.19273	0.198725	0.0268385	0.305798	1	0.43278		0.168914	0	0	0	0	0	0	0.398507	0.791192	0	1	0	0	0	0	0	0	0
0.199146	0.419453	0	0	0.0501041	0	0	0	0	0.25075	0.266457	0	0.199048	0	0.0186132	0.334501	1	0.10293		0.0546152	0.13319	0.642805	0.261019	0.0706456	0	0	0.0928233	0.0729417	0.939758	1	0.0405122	0.207133	0.0507692	0.173136	0.0442045	0.810907	0.194744
0.634668	0.0536806	0	0	0	0	0.0762167	0	0.34597	0.0588665	0	0	0.0238576	0	0.0181328	0.795602	1	0.208653		0.0820779	0.137957	0.290917	0.193878	0.522491	0.506195	0.154395	0.539301	0.0117484	0.889889	1	0.206036	0	0.527148	0.135662	0.142524	0.0219217	0.0398848
0.166176	0	0	0	0	0	0	0	0	0.230937	0	0	0	0	0	0.201131	1	0.453471		0.125271	0	0.0686881	0.175143	0.138025	0.0308177	0	0	0.311334	0.325986	1	0.0953755	0.222121	0.308231	0.0845765	0.0984697	0.399183	0.568133
0.35986	0.111761	0.33305	0.589243	0.240308	0	0	0.219673	0	0.789003	0	0	0	0	0.23636	0.824727	1	0.467538		0.282887	0.380562	0	0.465846	0.690625	0.38509	0.390218	0.615593	0.962885	0.16103	1	0.488748	0.107015	0.264496	0.496097	0.490793	0.267847	0.129411
0.390451	0	0	0.213612	0	0	0.183657	0.0203724	0	0.535594	0	0	0	0	0.0223787	0	1	0.460877		0.171252	0.199282	0	0.293145	0.582754	0	0.0918509	0.636962	0.0819477	0.225652	1	0.170795	0.345131	0.465069	0.580675	0.0796697	0.83541	0.541657
0.557531	0.0145103	0	0	0.0192207	0	0	0	0	0	0	0	0	0	0.0273908	0	1	0.346338		0.166954	0.610252	0.565069	0.0880654	0.0147338	0	0	0.544729	0.569509	0.307662	1	0.401392	0.218224	0.2303	0.5449	0.395957	0.00270462	0.18024
0.046093	0	0	0	0.554305	0.772941	0.772941	0.463765	0	0.413448	0.306258	0	0	0	0.0238244	0.0718501	1	0.798397		0.161771	0.29689	0.65067	0.274901	0.125219	0.584355	0.0806409	0.507399	0.314984	0.27406	1	0.44305	0	0.123107	0.274321	0.0869441	0.00333088	0.310325
0.0872378	0.603568	0	0	0	0.828012	0.865649	0.0940824	0	0.694273	0	0	0	0	0	0.328345	1	0.436029		0.138798	0.158084	0.106694	0.241158	0.49916	0.952123	0.0467818	0.187958	0.703301	0.759184	1	0.926012	0.201793	0.307686	0.0546292	0.523619	0.266765	0.020832
0.147823	0	0	0	0	0	0	0	0	0.552745	0	0	0	0	0.670224	0.931183	1	0.137591		0.218481	0	0.242069	0.0195734	0	0	0	0	0.106426	0	1	0	0	0	0	0	0.372532	0.0718295
0.624666	0.36932	0.5	0	0	0	0	0	0	0	0	0	0	0	0.102525	0.682171	1	0.0470501		0	0	0	0	0.135799	0	0	0.565713	0.978544	0	1	0	0	0	0	0	0	0.485108
0.0356829	0.520513	0.361055	0.443642	0.668666	0.848966	0	0	0	0.157085	0.409026	0.529961	0.0400958	0	0.0661529	0.276097	1	0.0420212		0.538683	0.0775885	0.0626798	0.0328146	0	0.400134	0.521055	0.454127	0.174492	0.719473	0.803843	1	0	0.253403	0.506805	0.743355	0.371465	0.377013
0.13013	0.884917	0.654173	0.654173	0.654173	0.654173	0.218058	0	0.313793	0.516411	0	0	0	0.431983	0.261056	0	1	0.349335		0.308176	0.0260997	0	0	0	0	0.103142	0.0498722	0.632154	0.244668	0.373291	1	0.14437	0	0	0.16617	0.242763	0.179022
0.812574	0.574764	0.0714286	0	0	0.625451	0	0	0.39392	0.656533	0	0	0	0	0	0.475083	1	0		0.0482396	0.024077	0	0.0411493	0.24851	0.161196	0.101069	0	0.0500429	0.114205	0.266403	1	0.465372	0.0225755	0.224079	0	0.0739652	0.344792
0.0571311	0.614447	0.394633	0	0.0469675	0.319285	0	0	0	0	0	0	0	0	0.0667778	0	1	0.128503		0.0382672	0	0	0	0	0.130752	0.340909	0	0.267786	0.0282724	0.0757576	1	0	0	0	0	0.289382	0.5618
0	0	0	0	0.124633	0	0	0	0.0454674	0	0	0	0	0	0.0548653	0.72885	1	0.61572		0.271205	0	0	0.0267704	0.28109	0.32623	0.340909	0.0530219	0.0767019	0.0732913	0.0681818	1	0	0	0	0	0.789623	0.398116
0.12551	0	0.0501908	0.942047	0.250954	0	0	0.0719114	0	0	0	0	0.0689027	0	0.0267618	0.657227	1	0.196658		0.0668188	0.00585554	0.279326	0.0577494	0.131791	0.159886	0.0742545	0.955191	0.770049	0.621742	0.40809	1	0.842438	0.828667	0.931875	0.752828	0.208073	0.0602067
0.622076	0.328362	0.700838	0.734413	0.464891	0.324644	0	0.456392	0	0.18364	0.182458	0.438513	0	0	0.124527	0.159599	1	0.121527		0.288241	0.112495	0	0.644386	0	0	0	0.0287329	0.076465	0.334367	0.0176616	1	0.0256102	0.0513877	0.0231227	0.272766	0	0.340837
0.456778	0.060073	0	0	0.0504812	0.16544	0.17461	0	0	0.168261	0.0453203	0	0	0.777449	0.793383	0.924537	1	0.181587		0.00716397	0	0	0	0.820941	0	0	0	0.0632554	0.0218482	0.777098	1	0.759525	0.355281	0.205013	0	0.146838	0.0156917
0.497599	0.0254424	0.111182	0	0	0	0	0.0405667	0.283967	0.0197698	0	0.20802	0.257176	0.562202	0.970166	0.424727	1	0.234119		0.241525	0.399483	0.927926	0.479483	0.39919	0.286953	0.370211	0	0.264303	0.228788	0.313066	1	0.0525435	0.145117	0.429983	0.332596	0.159167	0.0348539
0.146598	0.694761	0	0	0.068801	0	0	0	0.0848301	0	0	0	0	0	0.0463851	0.216613	1	0.27582		0.0388486	0.0637274	0.00667229	0.0110063	0.275466	0.20571	0.246412	0.0473412	0.074153	0.103437	0.740334	1	0.423009	0.225216	0.288257	0.184989	0.545553	0.051276
0.0284221	0.167681	0.0773911	0.532563	0.619828	0.284029	0.387445	0.202947	0	0.239472	0	0	0	0	0.0135485	0	1	0.786776		0.231151	0.0475122	0	0.20277	0.252336	0	0	0	0	0.0910981	0.467953	1	0.500604	0.0545579	0	0	0.207249	0.0524162
0.173806	0	0	0	0.200812	0	0	0	0	0.0175712	0.442793	0	0.0613989	0	0.0555207	0.191226	1	0.70218		0	0	0	0	0	0	0	0	0	0	0.00495505	1	0.587752	0	0.0147146	0.147815	0.14604	0.080197
0.325956	0	0.588891	0.61847	0	0	0	0	0	0	0	0	0	0.522122	0	0	1	0.868942		0.320952	0	0	0	0	0	0	0	0.412652	0	0	1	0	0	0	0.307123	0.14481	0.337529
0.00791112	0.166728	0.292097	0	0.139229	0	0	0.973815	0.0683271	0.430806	0.0566908	0	0.364327	0.574631	0	0.313121	1	0.179536		0.541159	0.784708	0.0962611	0.0187928	0.251824	0	0	0	0.119513	0.497412	0	1	0.972891	0.0423469	0	0	0.535894	0.108434
0.0205765	0.326193	0.455263	0.288144	0	0.0848368	0	0	0.11163	0.776153	0.92347	0.375885	0	0	0	0.00567512	1	0.206359		0.23002	0.25876	0.0345719	0.145614	0.241749	0.168091	0.0462753	0.0886614	0.174802	0.342707	0.564634	1	0.575072	0.143793	0.124004	0.07185	0.439157	0.127642
0.12669	0	0	0.0413791	0	0	0.185222	0.102741	0.709454	0.539942	0.125254	0.385531	0.205453	0.240751	0.662066	0.111465	1	0.0374111		0.0927314	0.0730346	0.0272118	0.0162336	0.177414	0.0769425	0	0	0.0290947	0.245772	0.584523	1	0.480086	0.104816	0.141707	0.16143	0.227731	0.142856
0	0	0	0	0	0	0	0	0	0	0	0	0	0	0	0	0	1		0.0375125	0.0174938	0.212612	0.325036	0.768668	0.240312	0.304562	0.33822	0.155215	0.36554	0.63399	1	0.744013	0.481695	0.242609	0.418382	0.00534064	0.0452984
0.248989	0	0	0	0	0	0	0	0	0	0	0	0	0	0	0.303256	0.351777	1		0.0791717	0.0159274	0	0	0.14058	0	0	0	0.507606	0.52354	0.0714286	1	0.896104	0	0	0	0	0.171889
0	0	0	0	0	0.505983	0	0	0.540283	0	0	0	0	0	0	0	0	1		0	0.602575	0.860402	0.873415	0.833597	0.588746	0.524	0.609805	0.54177	0.773939	0.558892	1	0.521588	0.172002	0.145624	0.549721	0.255565	0
0.401546	0	0	0	0	0	0	0	0.0520537	0.330198	0	0.318306	0	0	0	0	0	1		0.0160241	0	0.158073	0.155448	0.0407034	0.574049	0	0.544591	0	0.216758	0.029331	1	0.509978	0.856024	0.126375	0.0293027	0.0984964	0.287022
0.512201	0.098348	0.132578	0	0.0622931	0	0.251576	0.152385	0	0.198669	0	0	0	0	0	0	0.0549824	1		0.211692	0.186756	0.451283	0.406104	0.270736	0	0.205496	0.658354	0.405498	0.233313	0.820413	1	0.624899	0.0783096	0.290661	0.0540059	0.102858	0.624942
0.223567	0.556618	0	0	0	0	0	0.0333505	0.330644	0.394984	0	0.876925	0	0	0	0.198241	0.10343	1		0	0.173749	0.12282	0.0568933	0.0739972	0.573063	0.286417	0.316521	0.375876	0.757377	0.646462	1	0.867287	0.594345	0.0805362	0.606955	0.287703	0.151323
0	0	0	0	0	0	0	0	0.218667	0	0	0	0	0	0	0	0	1		0.174232	0.064682	0.0195442	0.123373	0	0	0	0.12504	0.586275	0.821882	0.256128	1	0.0993474	0.480839	0	0.225166	0	0.295586
0.275008	0.479907	0	0	0	0	0	0	0	0	0	0	0	0	0	0	0	1		0	0	0	0	0	0	0	0	0	0.125287	0.119565	1	0.52381	0	0	0	0	0
0.387732	0.412158	0	0	0.194745	0	0.288933	0.0427671	0.0555776	0.288787	0	0	0	0	0	0.17607	0.245422	1		0.117418	0	0	0	0	0	0.113948	0.429786	0.291174	0.557742	0.651778	1	0.581396	0.117664	0.0878879	0.258826	0.584508	0.987607
0.076657	0.855533	0	0	0	0	0	0	0	0.517405	0	0	0	0	0	0.0971988	0.228206	1		0	0	0.0772612	0.0374896	0	0	0.26198	0.0841348	0.671458	0.291555	0.281965	1	0	0.11714	0	0	0	0.0724704
0.741294	0.390828	0	0	0	0	0	0	0	0	0	0	0	0	0	0	0	1		0.0213813	0.067571	0.0454237	0.0926405	0	0	0.0451723	0	0.927684	0.374825	0.751299	1	0.971889	0.647926	0.0515234	0.0293567	0.0888101	0
0.953581	0	0	0	0	0	0.123277	0	0	0	0.139799	0.465998	0.764444	0	0	0	0.903099	1		0	0.124114	0	0.100611	0.132816	0.306773	0	0.0327775	0.477699	0.226944	0.118933	1	0.884148	0.23319	0	0	0	0.0551577
0	0	0	0	0	0	0	0	0	0	0	0	0	0	0.18572	0	0	1		0.161277	0.515496	0.136445	0.281339	0	0.0525126	0.300943	0.325892	0.342541	0.309947	0.478243	1	0.383179	0.513508	0.0326129	0.0677561	0.0431683	0.275198
0.552249	0.195375	0.207759	0.386825	0.0749504	0.11719	0.131606	0.308964	0.59609	0.38984	0.169102	0.0201051	0.0201944	0.379914	0.382633	0.111445	0.479755	1		0	0.482828	0.970586	0.59968	0.266392	0.0843365	0.182099	0.0567836	0.134318	0.274923	0.821062	1	0.521096	0.325554	0.0526783	0	0.0143097	0
0.822934	0.0562485	0.336934	0.257985	0.131357	0	0.0324356	0.149103	0.143668	0.165928	0.182073	0.122385	0	0	0	0	0	1		0.601198	0.185731	0.153789	0.308516	0.527334	0.52876	0.249243	0	0.311712	0.434261	0.199504	1	0.267473	0.453128	0.386546	0.491988	0.00788657	0.921767
0.505313	0	0.0179945	0	0	0	0.00753173	0.00989218	0.609918	0.10137	0	0.0109261	0	0	0	0.06218	0.086795	1		0	0.076131	0.0112877	0	0.196983	0	0	0	0.00280376	0.0444351	0.244432	1	0	0.0629914	0.116432	0.0831615	0.0617798	0.148917
0.612648	0.220048	0.125845	0.160143	0.162849	0.334589	0.252282	0.264925	0.102164	0.196743	0.100259	0.0802648	0	0	0.490228	0.0607507	0.0246612	1		0.273318	0.465922	0.65521	0.828446	0.0824071	0.376495	0.0717095	0.0481438	0.234075	0.569217	0.0471268	1	0.151544	0.0273486	0	0.340782	0.0384419	0.788546
0.38049	0.113314	0.633108	0.447454	0.397065	0.661774	0.287728	0	0	0.19099	0.36384	0.381111	0	0.338657	0.994712	0.925017	0.925017	1		0.986747	0.0685689	0.00470433	0	0.587362	0.220191	0.210221	0.154316	0.176252	0.483404	0.380482	1	0.29997	0.641821	0	0	0.840058	0.627103
0.180974	0.25424	0.40136	0.920302	0.998694	0.110382	0.219208	0.289351	0.554725	0.483844	0	0	0.0352452	0.155578	0.180156	0.451647	0.251009	1		0.517801	0.374921	0	0.233473	0	0	0.0973537	0.433621	0.529218	0.507231	0.380066	1	0.704116	0.428508	0.897595	0.0125532	0.382372	0.632015
0.227004	0.0666315	0.254439	0.147973	0.303548	0.368341	0.432657	0.238432	0.151724	0.684138	0.90979	0.187563	0	0	0	0	0.090524	1		0	0	0	0	0.504486	0.0902666	0.260189	0.460995	0.367061	0.175342	0.175199	1	0.842789	0	0	0	0.19377	0
0.14274	0.302435	0.21598	0.143167	0.242727	0.402245	0.241691	0.115581	0.104524	0.106723	0.0799161	0	0	0.40933	0	0.832326	0.065063	1		0.270027	0.506911	0.595544	0	0.166745	0.306719	0.332127	0.0802002	0.104533	0.109	0.212577	1	0.352192	0.165376	0	0.392837	0.827452	0.044493
0.122647	0.0927269	0.179344	0.0267047	0.287246	0.0509457	0.106712	0.0394041	0.485459	0.486167	0.50574	0	0.391922	0.136862	0	0	0.515496	1		0.585355	0	0.479834	0.51982	0.172432	0.00881107	0.101514	0.141272	0	0.26715	0.370084	1	0.600773	0.619559	0	0	0	0.10713
0.155017	0.190845	0.596854	0	0	0.172057	0.106037	0.236336	0.0820768	0.176852	0.180659	0.145519	0	0	0.125947	0.237798	0.313745	1		0.316772	0	0	0	0	0.218425	0.568275	0	0.192109	0.0978223	0.485494	1	0	0	0	0	0	0.601888
0.197477	0.0274921	0.459185	0	0	0	0.0427698	0.0552372	0.161752	0.490371	0.126711	0	0	0	0.0664055	0.109067	0.120295	1		0.14779	0.174088	0.742805	0.202903	0	0.146657	0.305032	0.385218	0.475204	0.49119	0.751984	1	0.550002	0	0.11285	0.587886	0.167537	0.129823
0.926665	0.0315578	0.0787732	0.0422954	0	0.071878	0.102342	0.0597019	0.191577	0.358644	0	0	0	0	0	0	0.0705351	1		0.107994	0.175804	0.828684	0.816452	0.445222	0.0848292	0.314997	0.759616	0.458463	0.415052	0.82906	1	0.559339	0.227761	0.332009	0.534145	0.0882744	0.432964
0.497852	0.322942	0.258238	0	0	0	0.0811475	0	0.323493	0.594239	0.663601	0	0	0.147316	0	0	0.0111995	1		0.510826	0.0109813	0	0.203646	0.131028	0.0908889	0.111937	0.14893	0.188643	0.46437	0	1	0.311286	0.0593302	0.109706	0.224065	0.290032	0.573959
0.339109	0.544821	0.0782346	0	0	0	0	0	0	0	0.0599628	0.462871	0	0	0	0	0.355278	1		0.498472	0.297422	0.162262	0.906586	0.853238	0	0	0.0211058	0	0.0599935	0.172261	0.025	1	0	0	0	0	0
0.517636	0.178646	0.0875734	0.197189	0.186761	0.317588	0.414194	0.457493	0.654872	0.935924	0.284232	0.206041	0.300444	0.232198	0.116969	0.284877	0.638688	1		0.0276247	0.0644095	0	0	0.10907	0.0238191	0.0218489	0.00808802	0.0298158	0.333786	0.454876	0.274491	1	0.74023	0	0.245375	0.349275	0.0662166
0.569197	0.324724	0.23197	0.339184	0.231221	0.311603	0.290162	0.384482	0.604634	0.801013	0.373054	0.403287	0.463847	0.455533	0.367986	0.60391	0.989834	1		0.778089	0.0120487	0	0	0	0	0	0	0.275652	0	0	0	1	0	0	0	0	0.0255991
0.371322	0.132767	0.123054	0.177908	0.226823	0.37776	0.102478	0.113105	0.493712	0.803844	0.25331	0.320622	0.343809	0.355168	0.296629	0.293469	0.763106	1		0.469847	0.0486269	0	0.250601	0	0	0	0.230692	0.265363	0.216595	0	0	1	0.181818	0	0	0	0.0494519
0.368115	0.0841869	0.045996	0.132733	0.100493	0.237357	0.249529	0.46057	0.620303	0.803194	0.126645	0	0.179623	0.300243	0.226916	0.213639	0.695748	1		0.0110715	0.797534	0	0	0	0.168709	0.215045	0.00938419	0	0	0	0.105661	1	0.298261	0	0	0.177059	0.0191396
0.428623	0	0	0	0.22904	0.242922	0.0613017	0.11919	0.46786	0.516381	0	0	0	0	0	0.0437563	0.777143	1		0.683818	0.54047	0.38911	0.418505	0.553477	0.214126	0	0	0.0742162	0.320022	0.483	0.565188	1	0.573535	0.580093	0.296158	0.165421	0.185682
0.218301	0.0727976	0.838082	0	0	0.1988	0.0865042	0.213848	0.347687	0.598875	0.215469	0.0498981	0	0	0.182999	0.286866	0.188572	1		0	0	0	0	0	0	0.575102	0.398732	0.832426	0.543216	0	0	1	0.053019	0	0	0	0.239315
0.211154	0.00327268	0.106405	0.262113	0.20969	0	0.00245535	0	0.400507	0.505435	0	0	0	0	0	0	0.665983	1		0.473803	0.294074	0.246437	0.529024	0.570331	0.668796	0.446818	0.162259	0.00553434	0.395289	0	0.453809	1	0.0118409	0	0	0	0.984465
0.367488	0.139153	0.143559	0	0	0	0	0	0.0854779	0.22509	0	0	0	0.218813	0.0312591	0	0.955632	1		0.186846	0.0412276	0	0.111406	0.272325	0	0	0	0.0242531	0.293583	0.215144	0.290562	1	0.0330646	0	0	0	0.0761266
0	0	0	0	0	0	0	0	0	0	0	0	0	0	0	0	0	1		0.477504	0.331667	0.399117	0.0440156	0.988033	0.212159	0.260942	0.0409741	0.465108	0.711768	0.526223	0.443523	1	0.200786	0.0765778	0.0977372	0.434519	0.221438
0	0	0	0	0	0	0	0	0	0	0	0	0	0	0	0	0	1		0	0	0	0.221931	0.552924	0	0	0	0.580147	0.777904	0	0	1	0.0578701	0	0	0	0.280318
0.0496634	0.241374	0.031108	0	0.0622321	0	0	0	0	0.0309265	0.649456	0.649456	0.649456	0.0811821	0	0.270933	0.694266	1		0.0741469	0.00954366	0	0	0	0	0	0.0581112	0.291653	0.477809	0	0.0922466	1	0	0	0	0	0.299466
0.139455	0	0.32488	0.176736	0	0	0	0	0	0	0	0	0	0	0.0770892	0	0.477402	1		0.200049	0.0624777	0	0.890083	0.626301	0.306048	0	0.233877	0.273812	0.200178	0	0.491315	1	0.0762524	0	0	0	0.730908
0.0801287	0.218926	0	0	0.111152	0	0	0	0	0.144098	0	0	0	0	0.0325573	0	0.364195	1		0.285507	0.285458	0	0.0309447	0.201406	0	0	0	0.367179	0.763537	0.360669	0.525192	1	0.0639092	0.0569258	0.0692174	0.0604549	0.867659
0.0799244	0.55141	0.304861	0.0617125	0.014301	0.00412606	0	0	0.13541	0.338155	0.225684	0.225684	0.225684	0.225684	0.299095	0.141448	0.493887	1		0.440539	0	0	0.12436	0	0	0	0	0.367074	0	0	0	1	0.155913	0	0.0395058	0.29283	0.652775
0.975913	0.151129	0	0	0.123416	0.370248	0.370248	0.0740497	0.0128192	0.166715	0.572279	0.635865	0.635865	0.635865	0.582102	0.116794	0.348728	1		0.907952	0.333121	0.298413	0.274089	0.482429	0.0365722	0.276629	0.4748	0.34059	0.948877	0.432667	0.870574	1	0.146079	0.502122	0.307193	0.0286846	0.442423
0.386693	0.326392	0.374845	0.0890258	0	0	0	0	0	0.233383	0	0	0	0.0350816	0	0	0.348415	1		0.224678	0.396545	0.0771351	0	0	0	0	0	0.190561	0.295259	0.00462899	0.151895	1	0.480153	0.0761536	0.533076	0	0.380013
0.0736761	0.0971646	0	0	0	0.0442203	0.13366	0	0.0699793	0	0	0	0	0.585332	0	0	0.0458596	1		0.150215	0.300448	0.488604	0.230624	0.852848	0.712692	0.591814	0.947414	0.419978	0.149201	0.283456	0.467258	1	0.0435574	0.133423	0.014525	0.0581811	0.0376551
0.129127	0	0.0115869	0.0329291	0	0	0	0	0	0.750158	0	0	0	0	0	0	0	1		0.438616	0	0	0	0	0	0.0245209	0.202347	0.305271	0.335146	0	0.434554	1	0.254277	0	0.0194066	0.00414113	0.0149958
0.238003	0.541946	0.113509	0.191608	0.710651	0.159015	0.632922	0.831137	0.0780611	0.126597	0.0608761	0.0800011	0.212336	0.254064	0.0820207	0.00964376	0.169581	1		0.126021	0.036816	0.0233823	0.271365	0.795417	0.639764	0	0.0381817	0.685174	0.173898	0.0155222	0.144965	1	0.540086	0.0663116	0.726057	0.854184	0.38275
0.803775	0.175423	0.138012	0.332683	0.841089	0.174608	0.621811	0.841209	0.406235	0.114267	0.151011	0.508182	0.807968	0.26045	0.0411982	0	0	1		0	0.388249	0.679852	0.0339265	0	0.330011	0.853928	0.071637	0.216564	0.435316	0.565787	0.29367	1	0.834143	0.145975	0.0771063	0.0888621	0.0148976
0.0806514	0.00577957	0.250138	0.216504	0	0	0.057198	0.191262	0.604673	0.347631	0	0	0	0.0118559	0.133372	0.0705757	0	1		0.42375	0.856635	0.36413	0.35999	0.331158	0.0841764	0.378933	0.327131	0.300115	0.440209	0.228785	0.731966	1	0.580984	0.918832	0.0573782	0.0533954	0.0921504
0.112183	0.193044	0.139378	0.161011	0.0222901	0.156721	0	0	0.455649	0	0	0	0	0	0	0	0	1		0.270889	0	0.0352891	0.110841	0	0.380514	0.141704	0.290129	0.3062	0.130677	0.453398	0.949204	1	0.634154	0.520354	0.0437078	0	0.118965
0.110541	0	0.00320487	0	0.132749	0.0582634	0	0.255256	0.789105	0.242408	0	0	0	0	0	0	0	1		0.162351	0.095261	0.0858821	0.125566	0.673075	0.0852187	0.0331715	0.109793	0.0933928	0.118304	0.153327	0.43543	1	0.839708	0.706433	0.161143	0.144334	0.101176
0.300565	0.0941171	0.00551743	0	0	0	0	0.349067	0.067405	0.206832	0	0	0	0.255087	0	0	0	1		0.0730542	0.062205	0.175591	0.146517	0.468551	0.666817	0.325781	0.177165	0.168572	0.273322	0.546695	0.580577	1	0.476383	0.0905012	0.277496	0.307445	0.576871
0	0.862064	0.877391	0	0	0.540956	0.843415	0.799932	0	0	0.0474209	0	0	0	0.36041	0.191605	0	1		0.599452	0.400324	0	0.458421	0.290148	0.487773	0.377972	0.232293	0.116688	0.204303	0.024889	0.294358	1	0.309173	0	0	0.316599	0.820245
0.414659	0.0964496	0.00987362	0.0227327	0.106559	0	0.0107412	0	0.0312927	0.310201	0	0	0	0	0	0	0	1		0.819894	0	0	0.154064	0.309657	0.288343	0.631315	0.351501	0	0.111382	0.446468	0.235569	1	0.277611	0	0	0	0.325779
0.0649408	0.151579	0.0552426	0.215737	0.401178	0.0995341	0.0280258	0.368229	0.0186892	0.420191	0.0915865	0.116041	0.365528	0.0456911	0	0	0.0856059	1		0.533744	0.182267	0	0	0.249778	0.335502	0	0.0930076	0.0671516	0.0966654	0.168468	0.145891	1	0.568555	0	0	0	0.271473
0.259263	0.203582	0.553243	0.183035	0.190662	0	0.0798381	0.110636	0.183612	0.95843	0	0	0	0.807118	0	0.436661	0.918299	1		0.434395	0	0	0.0298832	0.247324	0.111522	0.139832	0.0950354	0	0.0540641	0.0262934	0.466152	1	0.75784	0	0.523284	0.77494	0.119633
0.514752	0.173662	0.641039	0.0551597	0	0.172965	0	0.407207	0.496134	0.385908	0.202474	0	0	0	0.147674	0.363385	0	1		0.0719248	0	0.206185	0	0.0487373	0.0905232	0.0253244	0	0	0.0104003	0	0	1	0.00939992	0	0	0	0.315408
0.543045	0.355752	0.517636	0.151167	0.114087	0.121467	0.144597	0	0.00520534	0.0812457	0	0	0	0.0783892	0	0.075204	0.26082	1		0.70393	0.313785	0.508888	0	0.0657629	0.113343	0.0157162	0.150518	0.308443	0.561966	0.0158623	0	1	0.451444	0	0.674952	0	0
0.38002	0.187385	0	0	0	0	0.181775	0.610765	0.0402173	0.146278	0	0	0	0	0	0	0	1		0.656498	0	0.0534378	0	0	0.385828	0.48994	0	0	0.265412	0	0	1	0.679971	0	0	0.0956893	0.248628
0.0574027	0.012136	0.0284999	0.00939992	0.17395	0	0	0.0116774	0.00561107	0.171755	0	0	0	0.0200074	0	0	0	1		0.151034	0	0	0	0	0	0	0	0	0	0.306638	0.127725	1	0.778187	0	0	0	0
0.167833	0	0	0	0	0	0	0.0310539	0.373215	0.941307	0	0	0	0.0628722	0	0	0	1		0.164156	0	0	0	0	0	0	0	0.123455	0.201093	0.444404	0.010911	1	0.902951	0.0451364	0	0	0
0.555229	0	0.0124358	0.84879	0.378924	0	0.165381	0.538258	0	0.138175	0	0	0	0	0	0	0	1		0.0745851	0.249321	0.769308	0.538868	0.38288	0.0519356	0.359733	0.806185	0.72618	0.375477	0.951834	0.993752	1	0.657175	0.387584	0	0.670288	0.0291956
																			0.0865738	0.300461	0	0.199576	0.273105	0	0.33254	0.0265628	0.0686882	0.337231	0.0234924	0.474327	1	0.962072	0	0	0.409309	0
																			0.312775	0.217173	0	0.104464	0	0.55302	0.596674	0.980665	0.167048	0.952122	0.127805	0.0425057	1	0.249333	0.276491	0.262921	0.153222	0.0371564
																			0.350572	0.0969753	0	0.220441	0.35296	0.751351	0.15683	0	0	0.0789627	0.124091	0.619598	1	0.0277075	0.0266683	0.0328136	0.0270747	0.0424557
																			0.328584	0.330895	0.660715	0.122692	0.212565	0	0	0.294707	0.477841	0.0728736	0.241007	0.379757	1	0.241338	0	0.00173619	0.608082	0.115019
																			0.0152074	0	0.140438	0.0448776	0.0665843	0	0.284623	0.145069	0.153375	0.00601999	0.145067	0.174882	1	0.520449	0.604238	0.11154	0.0346651	0.00903688
																			0.352264	0.365017	0.278858	0.77492	0.13627	0	0	0.298264	0.0337275	0.318987	0.106637	0.467975	1	0.31454	0.0601199	0	0.395665	0.582806
																			0	0.0912297	0.0491237	0.179469	0.354662	0.109216	0	0	0	0	0.0719058	0.132221	1	0.153751	0.0373862	0.0373747	0.216656	0
																			0.240371	0.381589	0.526532	0.266259	0.130164	0	0.189699	0.0505863	0.178451	0.181486	0.137263	0.0430253	1	0.237295	0.075467	0	0.00559891	0.456848
																			0.552194	0	0	0.362162	0.294268	0	0.933655	0.59956	0.909784	0.100942	0	0	1	0.16842	0.057198	0.00359896	0.0911758	0.425141
																			0.185801	0.115266	0	0.592394	0.259204	0.712169	0.656622	0.4616	0.461468	0.189825	0.127751	0.341095	0.0897481	1	0.12718	0	0	0.0931468
																			0.0917151	0.0577759	0.446309	0	0.149577	0.685082	0.19581	0.250961	0.476665	0.193058	0.0479985	0.138623	0.833333	1	0	0	0.0358444	0.220016
																			0.12931	0	0.433101	0.313715	0.524975	0.244564	0.862369	0	0	0.120544	0	0.103053	0.916603	1	0	0	0.10524	0.644262
																			0.0359631	0.0580027	0.356611	0.238972	0	0	0	0	0	0	0	0	0.6	1	0	0	0	0
																			0.476806	0	0	0.763558	0	0	0	0	0.321533	0.219098	0	0.115398	0	1	0.91361	0	0	0.127592
																			0.00718033	0	0	0	0.186182	0	0.0631926	0	0.0411288	0.0261794	0.589692	0.295271	0.722277	1	0.171713	0	0.0771331	0.00070103
																			0.459899	0.288313	0.0899157	0.332267	0.33225	0	0	0	0.125141	0.162722	0.257481	0.198078	0.658574	1	0.597335	0.00971524	0.858809	0.644431
																			0.334184	0	0.0152353	0.0160277	0.102272	0	0	0	0.400077	0.202347	0.463489	0.698342	0.999495	1	0.26115	0.254576	0.0595912	0.18619
																			0.493066	0.372762	0	0	0	0	0	0	0	0.196881	0.0969478	0.159478	0.782308	1	0.996764	0.116148	0.22942	0.677429
																			0.010441	0.238522	0.392361	0.391773	0.520469	0.712837	0.486847	0.237534	0.0633166	0.0946403	0.321238	0.939869	0.900432	1	0.870779	0.804453	0.679507	0.0758124
																			0.398544	0.279814	0.208986	0.812422	0.510529	0	0	0	0.229419	0.196433	0.32739	0	0.296154	1	0.695055	0.0101872	0.55304	0.597506
																			0.0484437	0.00274007	0.293731	0.374715	0	0	0	0	0.129781	0.274485	0.790359	0.640382	0.775037	1	0.495777	0.0469276	0	0.0871471
																			0.00967458	0.051078	0	0	0	0.113605	0.264998	0.048941	0.0333364	0	0.14626	0.109692	0.517118	1	0.611543	0.421766	0.0707918	0.205089
																			0.414606	0.170412	0.00572546	0.033815	0.309445	0.241745	0.164334	0.20858	0.0818993	0.0768337	0.0389788	0.0654678	0.575556	1	0.294149	0.280764	0.264192	0.141824
																			0.0913001	0.346381	0.0700708	0.025714	0	0.0416367	0.168845	0.312357	0.251244	0.426536	0.0352419	0.0377788	0.404032	1	0.489366	0.0198881	0.0299224	0.319615
																			0.183381	0.558382	0.113457	0.143879	0.149859	0.582762	0.398237	0.656089	0.232433	0.245012	0.200984	0.5654	0.710884	1	0.473428	0.504276	0.320007	0.381857
																			0.0209	0.518356	0.440603	0.427081	0.790369	0.770683	0.739876	0.0608314	0.503281	0.288947	0.168992	0.903319	0.582086	1	0.58739	0.568636	0.393587	0.0920909
																			0.15384	0.341946	0.0419173	0.227755	0.603106	0.486519	0.298711	0.267899	0.377729	0.193515	0.584183	0.347058	0.37542	1	0.607635	0.507285	0.0945913	0.574266
																			0	0.0692556	0.494474	0.114445	0.112528	0.187547	0.262792	0.0670118	0.0707453	0.013078	0	0	0.266658	1	0.191634	0.0589884	0	0
																			0.0227902	0.199926	0.304187	0.55296	0.602742	0.728817	0.437414	0.289298	0.208007	0.278968	0.433683	0.35426	0.235905	1	0.761065	0	0	0.23164
																			0.101334	0.156659	0.194878	0.154784	0.183678	0.193381	0.0467214	0.0891605	0.276554	0.350158	0.148502	0	0.173006	1	0.447847	0.461665	0.0346824	0.991451
																			0.147897	0.0148175	0.0131014	0.0342306	0.21399	0.172127	0.031817	0.326881	0.264528	0.0680218	0.207477	0.080885	0.220929	1	0.577028	0	0	0.196586
																			0.145456	0.295742	0.187472	0.0268825	0	0.0383577	0.142436	0.292637	0.0814138	0.319911	0.0767964	0.175938	0.162446	1	0.435598	0.0419668	0.0257302	0.00143788
																			0.0420016	0	0.304961	0.391953	0.389847	0.027254	0.318512	0.91708	0.501461	0.752145	0.262707	0.29683	0.929414	1	0.0227347	0.0820712	0.0256279	0.62707
																			0.136535	0	0	0.154222	0.500128	0.617851	0.519108	0.896202	0.143105	0.143508	0.138633	0.755744	0.325239	1	0	0	0	0.297633
																			0.096103	0.0178908	0.0996775	0.00930323	0.537441	0.336096	0.265254	0.113138	0.035056	0.123307	0.608845	0.773402	0.864889	1	0.911668	0.254563	0.56346	0.146413
																			0.414186	0	0	0.395324	0.300551	0.137927	0.377845	0.350308	0.205489	0.328973	0.424906	0.492399	0.540122	1	0	0	0	0.614818
																			0.0708659	0.0261807	0.326821	0.700017	0.0442701	0.598389	0.606104	0.383872	0.343432	0.141818	0.0448049	0.190296	0.556847	1	0.726049	0.808808	0.60792	0.342973
																			0.436709	0.379243	0	0	0	0.11036	0.41627	0.034398	0.0100712	0.165685	0.0868569	0.332316	0.264656	1	0	0	0.0530913	0.00993044
																			0.183357	0	0	0	0.0741491	0.0886668	0.193415	0	0	0.086767	0.144226	0.193071	0.137419	1	0	0	0	0
																			0.468466	0.946107	0.703314	0	0.144861	0.323037	0.275804	0.0717394	0.0803417	0.144187	0.0415064	0.023113	0.0794816	1	0	0.0411734	0.113054	0.0976572
																			0.176551	0	0	0.068024	0	0	0.0257441	0.269281	0.234362	0.0345034	0.155988	0.067751	0.0610526	1	0	0	0.382791	0
																			0.663832	0	0	0	0.542439	0.10923	0.0431333	0.0200885	0.322579	0	0.0312532	0.265052	0.111455	1	0	0	0	0
																			0.197029	0.532721	0.190858	0.15731	0.590936	0.201394	0.270092	0.105215	0.190814	0.452514	0.626334	0.480381	0.898722	1	0.411493	0.159568	0.518838	0.313651
																			0.0975153	0.215165	0.0493769	0.168315	0.117964	0.353919	0.184572	0.0302419	0	0.0725287	0.107195	0.129829	0.173048	1	0.0382139	0.438676	0.201299	0.106967
																			0.334447	0.3096	0.00141683	0.326406	0.632602	0.712933	0.504551	0.870751	0.124292	0.113421	0.0267963	0.162239	0.408331	1	0.15237	0.483373	0.0778684	0.0237281
																			0.0327016	0	0	0.510434	0.939981	0.953113	0.684616	0.483156	0.124428	0	0.365876	0.0939367	0.252047	1	0.46492	0.0942925	0.914678	0.286877
																			0.696621	0.239314	0.0740584	0.0121905	0.183038	0	0	0.195184	0.672485	0.160667	0.0248348	0.205243	0.385392	1	0.556471	0.128937	0.204292	0.502509
																			0.109788	0	0.284677	0.0957108	0.177341	0.419929	0.159704	0.17323	0.575365	0.272973	0.0557131	0.0648936	0.402581	1	0.677534	0.0334509	0.0676061	0.330105
																			0.037262	0.00450923	0.054641	0.0918694	0.024824	0.033351	0.182892	0.399642	0.390765	0.282516	0.147237	0.102795	0.437803	1	0.42722	0.198962	0.288351	0.065188
																			0.0342986	0.105596	0.231723	0.0241524	0.00142095	0.0233146	0	0.183742	0.581763	0.218574	0.134288	0.338593	0.387441	1	0.723469	0.239945	0.258178	0.0180378
																			0	0	0	0	0.232695	0	0	0	0	0	0	0	0.176471	1	0	0	0.207179	0.127539
																			0	0.0967898	0.44089	0.0824437	0.271322	0.92761	0.453916	0.801518	0.349807	0.5191	0.665647	0.923011	0.718841	1	0.365261	0.173058	0.16019	0.0536519
																			0.125472	0.200346	0.106431	0.150717	0.182676	0.139744	0.271182	0.377634	0.0669609	0.810729	0.417311	0.235971	0	1	0.0692986	0.8541	0.48641	0.901917
																			0.152862	0.354308	0	0.579316	0.546133	0.39186	0	0.0600296	0.198853	0.200454	0	0.13376	0	0.284553	1	0	0	0.236565
																			0.279362	0.901068	0.128651	0	0	0.0878032	0	0	0.270691	0.2856	0	0	0	0	1	0	0.620995	0.304555
																			0.0324171	0.345684	0.459668	0.388857	0	0	0	0.00958398	0.0818135	0.258386	0.20321	0	0	0.133038	1	0.743802	0	0.112067
																			0.0170098	0.0457942	0.185032	0	0	0.569572	0	0	0.242487	0	0	0	0	0.162602	1	0	0	0
																			0.15899	0.0136173	0	0.105418	0.315953	0.229197	0	0	0.170902	0.0797278	0	0	0	0.0332594	1	0.247934	0.347124	0.087864
																			0.25076	0.57522	0.656356	0.373472	0.384893	0.0148829	0.0512216	0.0461083	0.237629	0.138948	0.101368	0.146192	0.148865	0.762726	1	0.329204	0.0828976	0.0649542
																			0.176703	0	0	0.496101	0	0	0	0.0468522	0.119341	0	0	0.116178	0	0.382726	1	0	0	0.0838476
																			0.273331	0.0547757	0.0306655	0.392529	0.588062	0	0	0	0.136924	0.488549	0	0	0	0.0436107	1	0.191938	0.0762191	0.230764
																			0.102394	0.114336	0.0742522	0.154545	0.573594	0.0268664	0.0424489	0	0	0.0632654	0.127558	0.0967666	0	0.257066	1	0.0723706	0.737429	0.197033
																			0	0	0	0.0666322	0.318882	0	0.492024	0	0.130675	0.900926	0	0	0	0.198221	1	0	0.180271	0
																			0.570892	0.0365103	0.0305749	0.100863	0.278895	0.125446	0.503137	0.126242	0.321361	0.118236	0.379704	0	0.218135	0.277415	1	0.505135	0.529026	0.118532
																			0.797992	0	0	0	0	0.0893946	0.536368	0	0.105885	0.600267	0	0.119447	0.0547467	0.0657931	1	0	0.172118	0
																			0.357827	0.13242	0.0476959	0.916451	0.0853167	0.0797202	0	0	0.546554	0.0166015	0.100267	0	0	0.211293	1	0.346646	0.0895041	0.273751
																			0	0.166874	0.0519272	0.530606	0	0.23938	0.686917	0.0902805	0	0	0	0	0.0668452	0.677808	1	0.42017	0.42075	0
																			0.049622	0	0	0	0	0	0	0	0.463601	0.891313	0.131785	0	0	0	1	0	0	0
																			0	0.149198	0.0482255	0	0	0	0	0	0	0	0	0.0525011	0	0.144406	1	0.252137	0	0.209781
																			0.00523429	0.052599	0	0	0	0	0	0	0.0980498	0.173788	0.0242514	0.0814899	0	0.146853	1	0.75	0	0.23296
																			0.0260655	0.5305	0.191507	0.565981	0.169702	0.561744	0.994749	0.285767	0.12343	0.190772	0	0	0	0.228311	1	0.42618	0.389429	0.018386
																			0.00210764	0.179167	0.100359	0	0	0	0.262203	0.464267	0.539346	0.266758	0	0.106153	0.298565	0.567907	1	0.115845	0	0.590743
																			0.00968681	0.0532889	0	0	0	0	0	0	0.133414	0.319304	0.819618	0.704253	0.675214	0.984236	1	0.322208	0.361362	0.187672
																			0.745433	0	0.0375093	0.130162	0.125031	0.0667064	0.0383205	0.22529	0.0960277	0.393394	0.163243	0.301148	0.57558	0.407397	1	0.211376	0.0345237	0.0790754
																			0.241666	0.0983114	0.00774974	0.0719149	0.213451	0.205523	0.359147	0.464092	0.364508	0.178944	0.0403457	0.0598557	0.270784	0.606694	1	0.348247	0.142483	0.0647605
																			0.367508	0	0	0	0	0	0.00409231	0.10119	0.0105726	0.234733	0.318921	0	0.350787	0.155905	1	0.135928	0.0166734	0.0243659
																			0.0577104	0.253951	0.319201	0.734059	0.822227	0.51567	0.514359	0.296793	0.190719	0.120431	0.201589	0.189982	0.324741	0.467604	1	0.415993	0.00663646	0.143172
																			0.241254	0	0	0.104068	0	0	0.182021	0.0479235	0.100741	0.046096	0.269818	0	0	0	1	0.252632	0	0.811502
																			0.858951	0.501432	0	0.581381	0	0	0	0	0.122367	0.0929492	0.0410778	0	0	0	1	0.292823	0.432926	0.595893
																			0.0793343	0.0288196	0.00262889	0	0.0476289	0.0167119	0.0109823	0.0194954	0.0560016	0.141415	0.14363	0.0414411	0	0.196907	1	0.0800827	0.0591082	0.434854
																			0	0	0	0	0.204385	0	0	0.477414	0.208288	0.509788	0.0534123	0	0.378481	0.540727	1	0.127263	0.0317701	0
																			0.766029	0.343877	0.101173	0.116465	0.328637	0.131455	0.33643	0.0619121	0.53059	0.676787	0.0689684	0.0572476	0	0.206068	1	0.0927027	0.464205	0.0588411
																			0.00766745	0.147482	0.669187	0.600175	0.651675	0.0623301	0.0739203	0.00925551	0.0921431	0.308432	0.486192	0.466446	0.601873	0.504612	1	0.620064	0.330919	0.0673732
																			0.0981149	0	0.020636	0.111754	0.171446	0.0156903	0.158351	0.419449	0.195523	0.09409	0.173746	0.13016	0.203192	0.510306	1	0.396162	0	0.295332
																			0.0711212	0.00641963	0	0.0896604	0.0295062	0.0747708	0.25398	0.154862	0.0367796	0.103011	0.206247	0.273037	0.171672	0.284077	1	0.805914	0.0961252	0.136382
																			0.109126	0	0	0	0.105362	0.0324871	0.027235	0.0145418	0	0.00435722	0.110348	0.029088	0.0283761	0.445937	1	0	0.0444241	0.0512557
																			0.456375	0.350047	0	0.28813	0.909883	0	0	0	0.106059	0.710402	0.349477	0.225504	0	0.510623	1	0	0	0.211752
																			0.174136	0	0	0	0	0.110954	0.0904082	0	0.015207	0.0919367	0.783673	0.192041	0.630972	0.104756	1	0.166667	0.076499	0.134614
																			0.452171	0.236179	0	0.500342	0.032479	0.0467076	0.0441072	0.202565	0.2135	0.344556	0.491606	0.477199	0.185092	0.384207	1	0.47096	0.368147	0.396181
																			0.0968569	0	0.361158	0.589892	0.465704	0.506724	0.437637	0.640017	0.639106	0.281024	0.481891	0.730173	0.825614	0.717033	1	0.472277	0.447179	0.0754199
																			0.381984	0.189743	0.112806	0.32167	0.380699	0.298011	0	0.0282456	0.446505	0.135298	0.253366	0	0	0.288889	1	0.25	0.121663	0.144434
																			0.757513	0	0.148045	0.244709	0.100039	0.0321942	0.264209	0.0880696	0.106943	0.14486	0.209792	0.281457	0.209984	0.191758	1	0.231531	0.13679	0.59777
																			0.273348	0.472587	0.551022	0.445611	0.1559	0.635692	0.406424	0.107584	0.162856	0.168779	0.0603386	0.659324	0.263609	0.856159	1	0.365424	0.0671825	0.118615
																			0.638669	0	0.660501	0.760624	0	0.0622861	0	0.221451	0.0164095	0.365491	0	0.0186703	0	0	1	0.85101	0.444173	0.492489
																			0.352736	0	0.233029	0.0094126	0	0.0295039	0	0	0.512439	0.17703	0	0.107204	0	0	1	0.473558	0.0268448	0.344751
																			0.15691	0	0.0918839	0.231902	0.53671	0.127292	0.167857	0	0.640307	0.171364	0.311581	0.0667602	0.167604	0.0251457	1	0.123118	0.0649837	0.53279
																			0.882718	0.652928	0.226392	0.0201718	0.138151	0	0	0.0810963	0.0101026	0	0.215793	0.259151	0.215718	0.468189	1	0.680615	0.540022	0.406547
																			0.0439708	0.108357	0.0342001	0.00952754	0	0	0	0	0.103581	0.152856	0	0.0255525	0	0.18226	1	0.471585	0.00788299	0.0377218
																			0.107887	0	0.114944	0.16712	0.0506943	0	0	0	0.0316903	0	0.142593	0	0.319446	0	1	0.232041	0.398177	0.615906
																			0	0	0	0.031338	0.356945	0.146093	0	0	0.447569	0.438202	0.306034	0	0.405996	0.536224	1	0.116507	0.0395021	0
																			0.684513	0	0.0628447	0.14976	0.0651093	0	0	0.138281	0.0875422	0.0940282	0	0.0395142	0.141566	0.23464	1	0.0636541	0.325891	0.502654
																			0.732998	0.908824	0.508743	0.304152	0.15867	0.0152793	0	0.0648092	0.130431	0.517471	0.318576	0.280943	0.413468	0.729146	1	0.661226	0.704548	0.73975
																			0	0	0.0153837	0.0076827	0.0139323	0.0767534	0.101478	0.0232822	0.146882	0.293553	0.396679	0.0557586	0.156694	0.681084	1	0.152824	0.313622	0.0569338
																			0.0849694	0	0	0.159349	0.0466289	0	0	0	0	0.206994	0	0.165105	0	0.0769231	1	0.112344	0.0268675	0
																			0	0.331414	0.113363	0.00359894	0.133082	0.0172477	0	0	0.169309	0.598603	0.0793678	0	0	0.870226	1	0.0117202	0.0079946	0.0634536
																			0	0	0.259448	0	0	0.0424837	0	0	0.149226	0.333736	0	0.0182135	0	0.079772	1	0.169102	0.0236214	0
																			0.148063	0	0.323875	0	0	0	0.301463	0.681955	0	0.213471	0	0	0	0	0.488889	1	0	0.0442461
																			0.344124	0.091487	0.0594373	0.0104502	0.090145	0.315507	0.537237	0.397867	0.100034	0.297148	0.410562	0.579331	0.251632	0.484687	0.447347	1	0.480896	0.182283
																			0.281353	0.145997	0.257314	0.097517	0	0.392565	0.089898	0.332985	0.201471	0.376995	0.619969	0	0	0.0596206	0.896296	1	0	0.108227
																			0.00128717	0	0	0	0	0	0	0	0	0.0265967	0	0	0	0.509756	0.806667	1	0.148226	0
																			0.0226488	0.179518	0	0.437869	0	0	0.223088	0.153501	0.047682	0.0624417	0.0439083	0.0760653	0	0	0.458333	1	0	0.0779769
																			0.105236	0.0547585	0.128059	0	0	0	0	0.0800454	0.0258842	0.1979	0.177312	0.0361561	0.0175971	0.0629606	0.997337	1	0.0467722	0.070146
																			0.148354	0.243903	0.208365	0.871427	0.97676	0.672334	0	0	0.229814	0.23978	0	0	0.0242165	0.170568	0.103392	1	0.226479	0.0861433
																			0.0652359	0.0258798	0.381945	0.494318	0.101266	0.0886912	0.0792839	0.388836	0.0728823	0.0638315	0.0301845	0	0.0926163	0.3509	0.0402195	1	0.540441	0.195134
																			0.30958	0.331224	0.94374	0.428244	0.0936124	0.101337	0.0321873	0.148356	0.355612	0	0.735858	0.334122	0.165496	0.238277	0.482009	1	0.456428	0.526873
																			0.743519	0.0170356	0.311997	0.205817	0.967953	0.745393	0.0521098	0.162825	0.339276	0.406983	0.363584	0.00107087	0.13843	0.205078	0.490941	1	0.775393	0.699979
																			0	0	0	0	0.713884	0.0888828	0.0501815	0.25531	0.679934	0.0664158	0	0	0	0.0304762	0.287511	1	0	0.0786582
																			0.54784	0.586524	0.389675	0	0.238767	0.1163	0.0412332	0.615468	0.536974	0.343804	0.0574385	0.378852	0.0990602	0.0685796	0.636856	1	0.788726	0.259755
																			0.124479	0.141516	0.050314	0	0	0.221604	0.0961632	0	0.480949	0.72906	0.105574	0	0.0212585	0	0.406133	1	0.221131	0.0805947
																			0.731449	0.114403	0	0.518393	0.620256	0.620256	0.0659209	0	0.192461	0.18525	0.53541	0.401064	0	0.123915	0.71553	1	0.497415	0.402107
																			0.121774	0.393538	0.172736	0.283553	0	0	0.201423	0.0969932	0.172804	0.598926	0.558005	0	0	0.442303	0	1	0.60548	0.570113
																			0.0429116	0.376292	0.947487	0.649473	0.463297	0.463297	0.147718	0.0351997	0.233693	0.17975	0.01726	0	0.115869	0.956038	0.917046	1	0.902372	0.518867
																			0.0599245	0.0252789	0	0	0.660378	0.501577	0	0	0.157762	0.51151	0	0	0	0.108684	0.141471	1	0.370771	0.105211
																			0	0.0906855	0.734121	0.019319	0	0	0	0	0.101011	0.29997	0.0205414	0	0	0	0.621458	1	0.111291	0.0505871
																			0.335324	0.191325	0	0.0431591	0	0	0	0	0.216088	0.0108984	0.0235392	0.00790968	0	0	0.483524	1	0.105587	0.189014
																			0.0463319	0.0832862	0	0	0	0	0	0.0489136	0.175739	0.205196	0.00996673	0.0334904	0.0654136	0.155585	0.974998	1	0.643925	0.116506
																			0.12264	0.0584657	0	0.0484262	0.226162	0.193144	0.165376	0.101836	0.111797	0.236636	0.709046	0.607754	0	0.525962	0.771411	1	0.357503	0.351335
																			0.693814	0.237078	0.234512	0.310594	0.446069	0.0504523	0	0.124207	0.421236	0.43685	0.293046	0	0	0	0.722675	1	0.355747	0.0701656
																			0.600333	0	0	0.233856	0	0	0.124929	0.459737	0.583047	0	0	0	0	0	0.289916	1	0.0931533	0.398514
																			0.197718	0.0868283	0.708994	0.0752883	0.258404	0.180883	0	0.445256	0.29777	0.77631	0.102698	0.718883	0.77649	0.205613	0.746087	1	0.281878	0.308322
																			0.545287	0.0861572	0.733052	0.502569	0.0923292	0	0.0349352	0.49027	0.124559	0.0219121	0.0433452	0.609304	0	0.150945	0.139415	1	0.169786	0.481512
																			0.0816498	0.0155478	0.172548	0.0203314	0	0	0.0274288	0.0513638	0.251669	0.0797046	0.105037	0.454002	0	0.0248844	0.764078	1	0.266858	0.0698208
																			0.160258	0.10619	0.354351	0.600563	0.4718	0.0517957	0.0558969	0.107179	0.233147	0.0534496	0.179777	0.193539	0.39179	0.360449	0.397434	1	0.0763317	0.0899863
																			0.039642	0.350879	0.408478	0.517572	0.249653	0.189734	0.775728	0.468507	0.256695	0.268148	0.517053	0.388558	0.443874	0.374018	0.241206	1	0.235904	0.479401
																			0.794404	0	0	0	0.368408	0.40729	0.106577	0.139662	0.0400643	0.0646533	0.0389103	0.196351	0	0.324395	0	1	0	0.168587
																			0.13686	0	0	0.188541	0.00763324	0.155226	0.35189	0.0485808	0.0385116	0.143954	0.0851467	0.365084	0.098621	0	0.142857	1	0.077381	0.11615
																			0.254602	0.654906	0.299535	0.573321	0.635872	0.336217	0.364914	0.293402	0.0628096	0.306885	0.724022	0.44859	0.690591	0.233377	0.444306	1	0.596962	0.0763502
																			0.499279	0.272756	0	0	0.041258	0.0546093	0.384438	0.848902	0.305864	0.48271	0.585041	0.503821	0.402285	0	0	1	0.112613	0.476859
																			0.0743584	0	0	0	0	0.509807	0.194274	0	0.282244	0.187615	0.298506	0.31581	0.182999	0	0.873016	1	0	0
																			0.694208	0.428622	0	0.67856	0.43154	0.781154	0.815213	0.513298	0.336255	0.450839	0.142404	0	0	0	0	1	0.81635	0.387191
																			0.163481	0	0.61371	0.398912	0	0.0423222	0.00792054	0.475201	0	0.0926113	0.722747	0.500363	0.035817	0	0.142857	1	0.364573	0.729413
																			0.122457	0.272105	0.673784	0	0	0.107799	0.276102	0.668032	0.879709	0.533722	0.128829	0	0	0	0.795455	1	0.19047	0.468667
																			0.0605248	0	0.230392	0.0421294	0.00140466	0.0125744	0.00296954	0.0390592	0.117732	0.225825	0.232139	0.264063	0.410083	0.432866	0.615831	1	0.374596	0.155356
																			0.538494	0	0	0	0	0	0.0208677	0.263917	0.117066	0.0706379	0	0	0.0607746	0	0	1	0	0.185883
																			0.4574	0	0	0.0172813	0.31688	0.408599	0.00357642	0.0324516	0.0264257	0.035411	0.0274011	0.127461	0.00442608	0.275683	0.285714	1	0.077381	0.0912353
																			0.834823	0.33194	0	0	0.333042	0.10486	0.311122	0.0273601	0.0995202	0.100907	0.417013	0.241562	0	0	0.068649	1	0.781272	0.439243
																			0.321736	0.151927	0	0.235149	0.186555	0.163487	0.112348	0.0142387	0.281288	0.318841	0.455895	0.0972516	0.0512149	0.0581427	0.16905	1	0.43919	0.572723
																			0.299192	0	0	0.208576	0.0609399	0.0835469	0.00221735	0.449959	0.017714	0.282467	0	0.0343442	0.0166529	0	0	1	0	0.0489658
																			0.135942	0.0861627	0.262289	0.125673	0.0134882	0	0.0296639	0.00965645	0.0078268	0.302662	0.272444	0.0272388	0.0649407	0	0	1	0.804762	0.281818
																			0.068555	0.425576	0.728901	0.78279	0.580142	0.132271	0.416655	0.684819	0.546133	0.391347	0.604414	0.639388	0.659818	0.426787	0.530197	1	0.355795	0.5902
																			0.273259	0.865331	0.93835	0.390356	0.441717	0.190958	0.269027	0.365887	0.232982	0.478368	0.179596	0.134016	0.0521664	0.0800793	0.282372	1	0.117137	0.353003
																			0.393191	0.159039	0.153284	0.178279	0.228636	0.243984	0.0404997	0	0.193725	0.252153	0.206008	0.0176683	0	0.112555	0.665983	1	0.214558	0.410703
																			0.253804	0.238697	0	0.0468343	0.477185	0.616514	0.165078	0	0.0820719	0.289154	0	0.0108204	0.275503	0.766655	0.715593	1	0.199374	0.453194
																			0.13964	0.0183124	0.338731	0.113158	0.0627009	0.0263608	0.551978	0.0298396	0.162122	0.0583545	0.0222436	0.0523154	0.0430329	0.121712	0.470196	1	0.0186777	0.0867302
																			0.265784	0.0971382	0.243444	0.212231	0.532496	0.505475	0.229567	0.0132397	0.167296	0.238119	0.215918	0.324013	0.666476	0.55576	0.643827	1	0.335757	0.194551
																			0.10517	0.500174	0.183689	0.106603	0.273197	0.0805881	0	0.0591244	0.760211	0.165702	0.384579	0.140626	0.816411	0.500621	0	1	0.833062	0.316988
																			0.57683	0	0	0.147483	0	0	0	0	0	0.0539305	0	0	0	0	0	0	1	0.872731
																			0.250095	0.108313	0	0.0402278	0.854863	0.284954	0.135713	0.57417	0.510325	0.0695394	0	0	0	0	0	0	1	0.509689
																			0.192753	0.0257313	0	0	0	0	0	0.437704	0	0	0	0.282571	0	0	0.106725	0.241362	1	0.126311
																			0.11174	0	0.28466	0	0.964152	0.253724	0.0426219	0.427681	0.0690822	0.0777397	0.293542	0	0	0.301126	0	0.13986	1	0.112822
																			0.325833	0.632753	0.124829	0.100806	0	0.0910661	0.60186	0.017296	0.0567302	0.338774	0.649065	0.466624	0.432059	0	0.21791	0.570131	1	0.220827
																			0.303464	0	0.190869	0	0	0	0.441988	0.0443786	0.340341	0.41856	0	0.0810311	0	0.314254	0	0.331126	1	0.432123
																			0.890757	0.147131	0	0	0	0	0.333367	0.886349	0.411913	0	0	0	0	0	0.453097	0.0813251	1	0.53266
																			0.0198459	0	0	0	0	0	0	0	0.148799	0	0	0	0	0	0	0	1	0.111557
																			0.218752	0.0361596	0.0987263	0	0.407552	0.156751	0.0358166	0.531911	0	0.154673	0.333746	0.320397	0	0	0	0.699301	1	0.176669
																			0.6241	0.444848	0.552551	0	0.0887728	0.00907903	0.277859	0.791366	0.575178	0.118208	0.022239	0	0	0.0200695	0	0	1	0.639059
																			0.112077	0	0	0	0	0.103314	0	0	0.717627	0.0595485	0	0.179696	0.177392	0	0	0	1	0.0651457
																			0.109197	0	0	0	0	0	0	0	0.0455357	0.0961402	0.102093	0	0	0.457751	0.102104	0.181818	1	0.0809317
																			0.276035	0	0	0	0.0720528	0.143933	0	0.105193	0.617018	0.348121	0.0273608	0	0	0.409913	0.109224	0	1	0.272264
																			0.0230462	0.0488474	0	0.0769563	0.355463	0.204487	0	0	0.383342	0.673562	0.287561	0.155242	0.140107	0.146105	0.0701166	0.23092	1	0.153747
																			0.0560682	0.0337298	0	0.0213764	0.135076	0.014311	0.173516	0.168332	0.869142	0.849151	0.17284	0.00608952	0.0443935	0.0243497	0.0205765	0.332391	1	0.287579
																			0.654776	0.71591	0	0	0	0.0489713	0.216707	0.00632923	0.00623923	0	0	0	0	0.0115769	0	0	1	0.0255111
																			0.0347369	0.162111	0.0760948	0	0.313094	0.702428	0.72836	0.416537	0.615358	0.111243	0.107305	0.375505	0.527142	0.702655	0.373177	0.755626	1	0.145267
																			0	0	0	0	0	0	0	0	0	0.013209	0.21438	0	0	0	0.141467	0.586944	1	0.420115
																			0.234793	0.236698	0.0236072	0	0	0.00407387	0	0	0.242192	0.747402	0.126102	0.186577	0.249442	0.0667026	0.104709	0.550589	1	0.9255
																			0.0511906	0.0210501	0	0	0	0	0	0	0.548008	0.351928	0.025189	0	0	0.0511716	0.0737577	0	1	0.331305
																			0.128528	0.0364032	0.0433503	0	0	0	0.18753	0.243812	0.610734	0.367236	0	0	0	0	0.194704	0.541353	1	0.429105
																			0.345245	0.236637	0	0.118081	0.619925	0	0	0.217923	0.717641	0.86646	0.443576	0.0739293	0	0	0.221491	0.207648	1	0
																			0.341179	0.11328	0.132124	0.690326	0.705941	0	0.203785	0.562446	0.376468	0.170807	0.258972	0	0	0	0.583063	0.234679	1	0.647143
																			0.0913548	0.0594924	0.430594	0.631361	0.397887	0.259445	0.185396	0.031347	0.0311248	0.446939	0.360415	0.228128	0.0378996	0.0137456	0.0395318	0.175302	1	0.592047
																			0.235451	0.0141385	0.28189	0.434669	0.59314	0.414657	0.191548	0.106054	0.242232	0.449982	0.533174	0.400266	0.0267934	0.00457984	0.134985	0.197694	1	0.602954
																			0.0829179	0	0.132286	0.0294008	0	0	0.0040907	0.0328504	0.135836	0.419141	0.423832	0.475957	0.267238	0	0.0128336	0	1	0.273125
																			0.707351	0.453687	0.0730112	0.203171	0.122035	0	0.0459986	0.215735	0.608433	0.710405	0.137248	0	0	0.124364	0.0571111	0.733776	1	0.436843
																			0.322113	0.0567746	0	0	0	0	0.00130924	0	0.0649861	0.646015	0.936897	0.426655	0.227347	0.046311	0.275547	0.507234	1	0.693269
																			0.183583	0.14296	0	0	0	0	0.00387519	0.0351121	0.178625	0.143903	0.392573	0.63698	0.234751	0	0.126449	0.315811	1	0
																			0	0	0.371863	0.161857	0.446867	0.52962	0.084808	0.121312	0.352474	0.832937	0.499209	0	0	0	0.054927	0	1	0.905604
																			0.137058	0.0546379	0	0.0443589	0	0	0.0345395	0.0816985	0.160948	0.13415	0.13825	0.363672	0.100373	0.0383091	0	0.213596	1	0.384018
																			0.0268708	0.495106	0.742415	0.501	0.959794	0.0992124	0.0118853	0.161901	0.151418	0.466049	0.182273	0.0236763	0.32381	0.809524	0.912395	0.878971	1	0.292998
																			0	0.0736594	0	0	0	0	0	0.0266292	0.346443	0.0732111	0.0341238	0	0	0	0.231613	0.301429	1	0.845411
																			0.254246	0.0848688	0.372356	0.54186	0.604224	0.60883	0.0930391	0.130077	0.213647	0.491729	0.554825	0.231037	0.0401188	0.0358468	0.100004	0.146138	1	0.489796
																			0.127663	0.227269	0.268043	0.0175286	0.112542	0.708276	0.855763	0.276329	0.493241	0.298697	0.510294	0.181889	0.286858	0.470389	0.399493	0.376736	1	0.280848
																			0.073815	0.341353	0.375749	0.244555	0	0.00730937	0.23929	0.205964	0.109844	0.413697	0.236316	0.315273	0.457989	0.126585	0.0668554	0.445788	1	0.727287
																			0.259725	0.0919556	0.00946179	0.0114531	0	0.0636491	0.225723	0.272881	0.152407	0.362445	0.311758	0.659836	0.260358	0.0103631	0.074715	0.404728	1	0.017679
																			0.164996	0.0397478	0	0	0	0.0169764	0.0148009	0.0296019	0.0597595	0.157953	0.537368	0.105531	0.141091	0.138973	0.527434	0.125684	1	0.22967
																			0.23419	0	0.0586279	0.213405	0.341165	0.4741	0.259736	0.229425	0.248926	0.290652	0.143657	0.571805	0.100464	0.203079	0	0.194169	1	0.249609
																			0.410404	0.239694	0.999572	0	0	0.220697	0.310213	0.200269	0.0492656	0.100306	0.0372449	0.0513039	0	0	0.0405647	0.488213	1	0.54539
																			0.262639	0	0.00584208	0.0342362	0.0449369	0.0460817	0.397156	0.116375	0.290231	0.973052	0.631669	0.59394	0.0339822	0.130596	0.197991	0.718209	1	0.815765
																			0.0976531	0.187446	0.00783498	0.0227033	0.0506293	0.135919	0.04529	0.00506411	0.334187	0.227785	0.592289	0.402147	0.680667	0.0928056	0.163295	0.400999	1	0.308108
																			0.285603	0.837483	0.323902	0.0520491	0.414429	0.414336	0.772831	0.305679	0.130002	0.139634	0.209607	0.0706411	0.0214757	0	0.212937	0.455657	1	0.795038
																			0.107198	0.14497	0.161029	0.0372642	0.119047	0.0642722	0.0808636	0.0562941	0	0.133435	0.189938	0.490266	0.186566	0.280041	0.00858308	0.608571	1	0.704899
																			0.21782	0.735978	0	0.189935	0.883627	0.262371	0.606615	0.247941	0.365961	0.545263	0.0706285	0.0968052	0.951611	0.238805	0	0.0542986	1	0.160191
																			0.157894	0.371264	0.924351	0.109242	0	0.53296	0.278819	0.0680841	0.102688	0.448164	0.241943	0.232291	0	0	0	0.993979	1	0.856002
																			0.198159	0.0244017	0	0	0.179066	0.0437006	0.00508628	0.0266263	0.0548198	0.063434	0.0382452	0.0269687	0.0656725	0.0266326	0.213937	0.392219	1	0.144489
																			0.357134	0.4019	0.681496	0.190082	0.45267	0.182731	0.149074	0.299561	0.0860667	0.284186	0.256993	0.0770466	0.00920568	0.135827	0.252232	0.81278	1	0.457653
																			0.236138	0.447313	0.113015	0.226078	0.103825	0.174821	0.462079	0.549579	0.559823	0.172309	0.0788816	0.153333	0.057985	0.0283922	0	0.123077	1	0.47887
																			0.395283	0	0	0	0.0214634	0	0.0220232	0	0.0495104	0	0	0.00474481	0	0	0	0	1	0.128416
																			0.058034	0.0920088	0.199352	0.115493	0	0.0111771	0.0284946	0.0448338	0.0249184	0.0718242	0.260962	0.071831	0.135429	0.0158582	0.124761	0.640225	1	0.223221
																			0.0116689	0	0	0.0224267	0.0596709	0.117354	0.00921698	0	0.008616	0.0341187	0.163357	0.585708	0.0504202	0	0	0	1	0.0253165
																			0.301089	0.343547	0.137322	0.220919	0.210773	0.0987146	0.107109	0.0345578	0.166007	0.12574	0.164662	0	0.492227	0.18866	0.417955	0.0597078	1	0.472533
																			0.301373	0	0.0276099	0	0.0708631	0.232029	0.0177702	0.0949137	0.0773969	0.0591066	0.0942687	0.044963	0	0	0	0	1	0.0364306
																			0.162484	0.0231785	0.453665	0.131204	0.156332	0.164152	0.43178	0.663706	0.0873016	0.632063	0.224346	0.42728	0.139744	0.130916	0.0234675	0.665613	1	0.420111
																			0.152109	0	0	0	0.273622	0	0.290659	0.36703	0.498501	0.777072	0.0535688	0.0625961	0	0	0	0	1	0.386888
																			0.183482	0.0273697	0	0	0	0	0.106626	0.269378	0.234731	0.33067	0.244438	0.0135331	0.0282954	0.190409	0.374792	0.75437	1	0.300616
																			0.020906	0.0268283	0.131295	0.0544293	0.198605	0.274399	0.229715	0.368115	0.720449	0.663047	0.157984	0.00177083	0.0184602	0	0	0.584912	1	0.00863745
																			0.458021	0.509097	0.47624	0.0440116	0.25136	0.0818589	0.249621	0.0375313	0.120579	0.261156	0.128264	0.100595	0.00768185	0.329728	0.699372	0.801256	1	0.506308
																			0.747897	0	0	0	0	0.0852703	0.0568859	0.0476844	0.206896	0.252991	0.141185	0.521248	0	0	0	0	1	0.686387
																			0.0919001	0.39596	0.705803	0.23734	0	0	0	0.0864361	0.381086	0.0997926	0	0.0326347	0.342015	0.108305	0	0	1	0.473428
																			0.236705	0	0.357934	0.542866	0.0618618	0.267271	0.416131	0.503613	0.315909	0.716364	0.0981074	0.499911	0.0377945	0.0413039	0	0.266786	1	0.478884
																			0.184099	0.503887	0.198895	0.225976	0.0725826	0.0210077	0.334488	0.453063	0.579603	0.433301	0.697362	0.495503	0.236704	0.0714881	0	0.399104	1	0.662855
																			0.335325	0.887837	0	0.120451	0.221621	0.441769	0.118673	0.0242075	0.84	0.319629	0.616205	0.430381	0.188178	0.198439	0.338467	0.773615	1	0.644861
																			0.326783	0	0.0170331	0.0178403	0.0135166	0	0.120136	0.0703012	0.0590638	0.00870452	0.0222937	0.0238785	0	0.0400638	0.0862912	0.364945	1	0.0849414
																			0.122699	0.27393	0.33327	0.101717	0.19096	0.119034	0.0558949	0.058414	0.0264393	0.0732266	0.188387	0.0639967	0.0782545	0.0299376	0	0.3703	1	0.364155
																			0.710987	0.363544	0.823326	0.772049	0.285059	0.673693	0.281685	0.677577	0.0722704	0.280186	0.878739	0.135761	0.0246155	0.279761	0.929799	0.768574	1	0.368865
																			0.11971	0.0419034	0.289718	0.028246	0	0	0.702551	0.228788	0.342264	0.587017	0.20409	0.139462	0.0255484	0	0.257234	0.38335	1	0.569219
																			0.370089	0.0656919	0	0	0.22955	0.229824	0.169202	0.0487003	0.120239	0.121732	0.523119	0.140575	0.216145	0.542616	0.919505	0.532296	1	0.566452
																			0	0	0.164913	0.393045	0.342798	0.158396	0.207525	0.201777	0.296056	0.261293	0.932054	0.707382	0	0	0	0.917113	1	0.0290932
																			0.221511	0	0	0.774301	0.414266	0.794847	0.467799	0.516327	0.43336	0.237874	0.324804	0.356009	0.886841	0.891347	0.548521	0.783217	1	0
																			0.529538	0.0485302	0.0628651	0	0.0765757	0.396021	0.149196	0.199412	0.0705447	0.299424	0.137381	0.23472	0.0175698	0.00366437	0	0.0454061	1	0.117415
																			0.685789	0.617112	0	0	0	0.374812	0.224688	0.0316134	0	0.331828	0.016853	0.341417	0.0407638	0.263851	0	0	1	0.206949
																			0.14928	0.804543	0.445272	0.303079	0.0285488	0.0252756	0.0779908	0.240097	0.193736	0.186013	0.153016	0.542291	0.262069	0.282302	0.186646	0.253929	1	0.416958
																			0.00858389	0.961804	0	0	0.273335	0	0.324328	0.0604777	0	0	0	0	0	0	0	0	1	0.868257
																			0.283808	0.0507827	0	0	0.0160987	0.0557373	0.124002	0.127799	0.0787815	0.0286811	0.0278298	0.0419425	0.00904477	0.286883	0	0.244378	1	0.0445513
																			0.356757	0	0.158224	0.0923568	0.60919	0.0205353	0.356405	0	0	0.0172658	0	0	0	0	0	0.618925	1	0.341546
																			0.106013	0.276607	0	0	0	0.0471447	0.0522117	0.0789441	0.185454	0	0.114745	0.0487054	0	0.0498138	0.0981779	0.451305	1	0.182185
																			0.267919	0.281017	0.307476	0.185724	0.13558	0	0	0	0.0353025	0.00424435	0	0.165545	0.680196	0.438946	0.0416564	0.4721	1	0.882138
																			0.0876061	0.267811	0.0809032	0.0812152	0.276861	0.529328	0.158829	0.159897	0.314255	0.0672762	0	0.124095	0	0.0172974	0	0.0493391	1	0.391458
																			0.0724622	0.273576	0.143741	0.00276727	0.00632955	0.0245418	0.399285	0.0900162	0.0302177	0.168222	0.135628	0.336472	0.688746	0.649303	0.45981	0.121775	1	0.218892
																			0	0	0.890134	0	0.12615	0	0	0.914817	0.161087	0	0.206299	0.169645	0.169315	0	0	0.73184	1	0.473847
																			0.172277	0.175931	0.312671	0.615776	0.295194	0	0	0	0.222477	0.590414	0.557282	0.142421	0.381427	0.161339	0.103768	0.369674	1	0.936186
																			0.299171	0.284884	0.114608	0.153724	0.362574	0.331146	0.922122	0.947662	0.4111	0.481983	0.0637477	0.248098	0.454748	0.216853	0.33214	0.1549	1	0.572109
																			0.343667	0	0.735972	0.155457	0.1987	0	0	0	0.141516	0.0556914	0.0697248	0.0675944	0.359801	0.747279	0.889205	0.328128	1	0.601806
																			0.110453	0.0281486	0.164822	0.0227992	0.0400449	0	0	0.0877306	0.00425727	0.136997	0.227067	0.0527695	0	0.0776398	0.00385492	0.658403	1	0.365584
																			0.271548	0	0.998024	0	0	0	0.181033	0.573321	0	0	0	0	0	0	0	0	0	1
																			0.203786	0	0	0	0	0	0.394758	0	0.104336	0.0333417	0	0	0	0	0	0	0	1
																			0.897605	0.122517	0.855717	0.272257	0.168159	0.197404	0.206442	0.0254745	0.394282	0.443715	0.550311	0.0466149	0.828709	0.164015	0	0	0	1
																			0.625658	0.530991	0.555433	0.530706	0.323309	0	0.0307324	0.186037	0.132925	0.00673381	0.151195	0	0	0.272174	0.074866	0.145125	0	1
																			0.0294692	0.0600253	0	0.388836	0	0.198325	0	0	0.560472	0	0	0	0	0	0	0	0.14644	1
																			0.0743413	0.0169337	0.11887	0.354506	0.874371	0.0835541	0	0	0.0890609	0	0.462499	0	0	0	0.484561	0	0.191332	1
																			0	0	0	0	0	0	0	0.14601	0	0	0	0	0	0	0	0	0.119143	1
																			0	0	0	0	0	0	0	0	0	0.333456	0	0	0	0	0	0	0.618097	1
																			0.120827	0.221192	0	0	0	0	0	0	0	0	0	0	0	0	0	0	0	1
																			0.129914	0	0	0	0	0	0	0	0.430419	0.37931	0	0	0	0	0	0	0.225276	1
																			0.118953	0.414406	0.510947	0.06402	0.025991	0.0909686	0.1269	0.0974361	0.130844	0.0847638	0.217609	0	0	0.0143149	0.242241	0.156476	0.00887282	1
																			0.822376	0.850849	0.638532	0.695928	0.774032	0.581747	0.992022	0.247939	0.998214	0.656381	0.900404	0.224279	0.457113	0.796216	0.837664	0.103243	0.0865854	1
																			0.501757	0.294232	0	0.572136	0	0	0	0	0.0185546	0.215703	0.19573	0	0	0.13536	0	0	0	1
																			0.297026	0.205779	0.31804	0.240533	0.227697	0.0908716	0.0330161	0.024628	0.342961	0.132101	0	0.150802	0.229281	0.106835	0.211176	0	0	1
																			0.147947	0	0	0	0	0	0	0	0.135151	0	0	0	0	0.0273347	0	0	0	1
																			0.389204	0.16213	0	0	0	0.676445	0.167655	0.152671	0.961456	0.75565	0.0665065	0	0.641467	0.0418903	0	0	0	1
																			0.167164	0.508121	0.523118	0	0	0.425312	0.602387	0.112948	0.0371613	0.541615	0.726898	0	0.399983	0.0214359	0.429399	0	0	1
																			0.358105	0.27725	0.250705	0.364009	0.181327	0.58539	0.44669	0.110711	0.653635	0.478107	0.0236199	0.31419	0.268364	0.158542	0.0679092	0.00539657	0.0292344	1
																			0.41973	0.241436	0.0776133	0.37961	0.129156	0.259086	0.137256	0.00171803	0.271288	0.318873	0.187299	0.0750209	0.293677	0.120512	0.0384169	0	0.022292	1
																			0.382137	0.207819	0	0.832588	0.184775	0.466603	0.494494	0.245363	0.298237	0.50299	0.0847267	0	0.415168	0.403753	0.241964	0	0	1
																			0.32447	0.0991117	0	0.10092	0.119139	0.112976	0.209226	0.0549023	0.354288	0.151461	0	0.780597	0.0887089	0.226427	0.36683	0.444091	0	1
																			0.460467	0.118857	0	0.161445	0.0978346	0.221424	0.0250413	0.162738	0.290207	0.116696	0	0.0127489	0.549773	0.0945755	0	0	0	1
																			0.435701	0.182487	0	0.0537256	0.00590463	0	0.13719	0.0206939	0.0198822	0.129311	0.0930098	0	0	0.0107233	0	0	0.21744	1
																			0.244544	0	0	0	0.45859	0.0557248	0.0664869	0.00873827	0.2977	0.123796	0	0	0	0.00795737	0	0	0	1
																			0.314457	0.00413746	0.0678689	0.0336435	0.00369754	0.166367	0.405268	0	0.0265529	0.204972	0.101934	0.0433206	0	0.205508	0.103188	0	0.040931	1
																			0.644129	0.0332165	0	0.487281	0.487558	0.119673	0	0	0.142832	0.689644	0.560159	0.340658	0	0.0722988	0.189239	0.991636	0.851575	1
																			0.21346	0	0	0.220633	0	0	0	0.114346	0.488035	0.59691	0	0	0.420082	0.126879	0	0	0.136416	1
																			0.313008	0	0	0	0.0785952	0.0380646	0	0	0.0353154	0.474086	0.259295	0	0	0.0277365	0.337	0.172271	0.10099	1
																			0.188265	0	0	0	0.0973745	0.216826	0	0	0.0989962	0	0	0	0	0.258422	0	0	0	1
																			0.143317	0	0	0	0	0.375562	0	0.142891	0.301956	0.209783	0.0998877	0	0	0	0	0	0	1
																			0.356898	0.402294	0.217842	0.21498	0.219932	0.722628	0.345527	0.116903	0.392375	0.618422	0.318845	0.00282275	0.190196	0.112953	0.113221	0	0.0245305	1
																			0.103867	0.00780079	0.00546563	0.263312	0.073138	0.104778	0.0582276	0.276751	0.0666645	0.039845	0.225491	0.115237	0.29844	0	0.408813	0.0757583	0.0345906	1
																			0.709486	0.0866395	0.568041	0.239455	0.0689887	0.216493	0.266793	0.0250654	0.12772	0.0748253	0.265347	0.279967	0.22241	0.133897	0.532301	0.630131	0.423763	1
																			0.189125	0.0168223	0.00155633	0.0872278	0.0199126	0.016921	0	0.0253106	0.103238	0.0385657	0.127161	0.00672161	0.171996	0.0132038	0	0.00667691	0.0185701	1
																			0.397205	0.106048	0.0192758	0	0	0	0	0.104607	0.01546	0.135736	0.107739	0.081849	0.0642892	0.00759498	0.426784	0.131343	0.29029	1
																			0.112385	0.00598106	0.0103399	0.0265705	0.215575	0.122136	0.0160248	0.0320866	0.184562	0.161713	0.00865112	0.0736469	0.167023	0.008109	0	0	0.0724608	1
																			0.166221	0.0805743	0.161438	0	0	0.516899	0.620279	0.179272	0.198641	0.2131	0.0366069	0.0183597	0.325638	0.277403	0.31929	0.1897	0.0208942	1
																			0.98451	0.259768	0.104195	0.0920049	0	0	0.0233281	0.0328534	0.22846	0.537494	0.439327	0.313762	0.0954011	0.0141347	0.0514705	0.504243	0.454177	1
																			0.59499	0.15196	0.0929995	0.406721	0.515992	0.32202	0.234197	0	0.317326	0.234172	0	0	0.171567	0.32476	0.151202	0.0271598	0.0424675	1
																			0.662217	0	0.325935	0.704826	0.0271087	0	0.135291	0.429701	0.351679	0.839311	0	0.176602	0.190266	0.0186971	0.238274	0.0202869	0.0543311	1
																			0.936046	0.34947	0.171151	0.240715	0.271617	0	0.0899066	0.206785	0.0401137	0.242461	0.582356	0.256331	0.19399	0.0242877	0.290347	0.0277854	0.233467	1
																			0.755292	0.219364	0	0	0	0.153615	0.13965	0.107521	0.383693	0.452475	0.108207	0.0468728	0.162372	0	0.0185149	0.0754074	0.0158965	1
																			0.416368	0.636909	0.371882	0.253784	0	0.124145	0.350513	0.36324	0.432473	0.460717	0.661523	0.234869	0	0.27839	0.436515	0.229195	0.137637	1
																			0.966403	0.000614688	0.00160126	0	0	0	0.127685	0.249544	0.107809	0.1356	0.00913048	0	0	0	0.0145207	0.48254	0.956448	1
																			0.58606	0.233516	0	0	0	0	0	0	0	0	0	0	0.179253	0	0.0912404	0.197688	0.0307514	1
																			0.749689	0.935189	0.172365	0.395613	0.439946	0	0.0412424	0.0667283	0.135561	0.429791	0.657745	0.240826	0.50248	0.208762	0.413562	0.0646478	0.147582	1
																			0	0	0.44652	0	0	0	0	0	0	0	0	0	0	0	0	0	0	1
																			0.206572	0.206796	0.0129948	0.173403	0.164707	0.0205441	0	0.0324873	0.153871	0.338508	0.301679	0.0872916	0.113358	0.0583154	0.100138	0.0564236	0.00477939	1
																			0.536644	0.321504	0.612489	0.347079	0	0.27778	0	0	0.0252136	0.489137	0.377659	0.554455	0	0.588333	0.0630669	0.113665	0.397687	1
																			0.554803	0.37183	0.707577	0.387004	0.451103	0	0	0.10817	0.613321	0.915635	0.122831	0	0	0.277426	0.457449	0.12437	0.132085	1
																			0.374633	0.559477	0	0	0	0	0.010453	0	0.0560579	0.249465	0.0971599	0	0.0698358	0.0116265	0.229422	0.526685	0.17862	1
																			0.289306	0.0903318	0.138117	0.473543	0.473543	0.0720608	0	0	0.119901	0.0249394	0.0273869	0	0.339184	0.0804813	0.0410566	0.0594338	0.0121228	1
																			0.200668	0.015923	0.020468	0.266233	0.0682897	0.0531774	0.0548735	0.268212	0.114983	0.0762704	0.24917	0.0930036	0.28455	0	0.293104	0.0850305	0.0757073	1
																			0.329249	0.11276	0.0328861	0.246314	0	0.14487	0.11383	0.0787485	0.134167	0.0998729	0.0904454	0.00394824	0.324995	0.0649395	0.170369	0.106473	0.0841872	1
																			0.532345	0.176676	0.14978	0	0	0	0	0	0	0.246367	0	0	0.190773	0	0.387319	0.0510316	0.0883349	1
																			0.659525	0.47655	0.109489	0.79227	0.8443	0.333565	0.106918	0.0542204	0.0923639	0.519621	0.658582	0.215667	0.0964196	0.346319	0.378608	0.213324	0.405507	1
																			0.626229	0.187046	0.0102584	0.0754999	0.0336568	0	0.0527911	0.162732	0.257072	0.347317	0.200765	0.123972	0.372256	0.0428997	0.105838	0.11541	0.0797951	1
																			0.0257059	0.185932	0.00756416	0.144404	0.565748	0.16609	0	0.0588668	0.626706	0.324013	0	0.0895613	0.00541533	0.230574	0.0896464	0.178418	0.0938752	1
																			0.530036	0.0607381	0.080847	0.0181555	0	0.24453	0.0306983	0	0.0981043	0.0709014	0.194518	0.179103	0.423244	0.280224	0.0186387	0.0424054	0.132577	1
																			0.782878	0.151555	0	0	0	0	0	0	0	0.815015	0	0	0	0	0	0	0	1
																			0.449899	0.0654263	0.127158	0.0486053	0.223307	0	0	0	0.448419	0.316851	0.104373	0	0	0	0.237144	0.102445	0.289906	1
																			0.0596595	0	0	0	0	0	0	0	0.835249	0.963529	0.0501278	0.36642	0.392593	0	0	0	0	1
																			0.689053	0.360768	0.214343	0	0.863968	0.479982	0	0.0221647	0.0766209	0.659503	0.148168	0.0948503	0	0.187819	0	0	0.0475664	1
																			0.125214	0	0	0	0	0	0	0	0	0	0	0	0	0	0	0	0	1
																			0.0338642	0.00947838	0	0	0	0	0.134168	0.413814	0.243725	0.280926	0	0.248552	0.290743	0	0	0.428671	0.0358108	1
																			0.741849	0.389699	0.24327	0.0217542	0.564895	0.299844	0.133995	0.554767	0.0943132	0.514912	0.207707	0.206549	0	0.11733	0	0	0.0931793	1
																			0.581394	0.538162	0.216131	0	0.862873	0.479374	0.385665	0.134773	0	0.685045	0.0691239	0	0	0.450194	0	0	0	1
																			0	0	0.128006	0.391233	0.0598873	0.458329	0.364199	0.113226	0.510517	0	0.479583	0.0828667	0.0457169	0.731345	0	0.112446	0.0606428	1
																			0.241783	0.442202	0.212568	0.112024	0.34815	0.0741159	0.273899	0.054903	0.0725571	0.0908392	0.577579	0.115191	0.202007	0.851351	0.579849	0.390043	0.163746	1
																			0.0145245	0.0753458	0.0503754	0.0687123	0	0.140816	0.0256465	0.0410986	0.419331	0.294761	0.177179	0.0943365	0.0609718	0.0222422	0.354633	0.812653	0.592277	1
																			0.71379	0.309801	0.826882	0.290618	0	0.544549	0.738622	0.932383	0.548477	0.530676	0.541026	0.635103	0.249147	0.0330489	0.0446419	0.235893	0.444557	1
																			0.063204	0.0229877	0.781814	0.401355	0.139302	0.0246148	0	0	0.138991	0.120866	0.0130733	0	0	0.0807904	0.00807904	0.146982	0.111919	1
																			0	0	0.0138614	0.212815	0	0	0	0.203072	0.243123	0.313359	0.372773	0.0962215	0.568113	0.813431	0.296787	0.402231	0.0442278	1
																			0.122804	0	0.0024755	0.051695	0	0	0.00064198	0.218624	0.254178	0.240713	0.0144913	0.0395273	0	0	0	0	0.562662	1
																			0.665042	0.884529	0.0208014	0.122068	0.0694767	0.244175	0.174738	0.814645	0.448752	0.0218743	0.176599	0.291426	0.380559	0.319231	0.39342	0.142331	0.112583	1
																			0.279205	0.481296	0.0284636	0.155298	0.0510764	0.131395	0.196857	0.22061	0.408479	0.894497	0.293059	0.234251	0.578033	0.338817	0.178264	0.210729	0.632607	1
																			0.423304	0.691186	0.444469	0.105826	0.0804118	0	0.223705	0.532864	0.149975	0.393176	0.101489	0	0.228994	0.183195	0.11704	0.169024	0.918379	1
																			0.245074	0	0	0.394973	0	0	0	0	0.342916	0.693512	0.314318	0.238504	0	0	0	0.373333	0.941176	1
																			0.0252872	0.780947	0.11786	0	0.013594	0.829234	0.798942	0.252375	0.497826	0.752159	0	0	0	0.0491473	0.6598	0.782427	0.806723	1
																			0	0	0.265479	0.235224	0	0.306837	0.585779	0.0800444	0.297844	0	0.569904	0.841869	0	0.165691	0	0	0.215825	1
																			0.426219	0.217285	0.0618874	0.109946	0.048157	0	0.0283354	0.0152273	0.522862	0.254593	0.0766403	0	0.00722409	0.00205554	0.954453	0.547751	0.366934	1
																			0.0333502	0.371341	0.0861638	0.00249354	0	0.0574925	0.321293	0.112082	0.121869	0.208814	0.0557891	0.301526	0	0.0405118	0.134119	0.104787	0.940532	1
																			0.421317	0	0	0.169725	0	0.103468	0.0708516	0.677572	0.312254	0.331495	0.408778	0.303319	0.190935	0.0448407	0	0	0.177527	1
																			0.839886	0	0.056542	0	0	0	0	0	0	0.0385495	0.0986025	0.193556	0	0	0	0.0486963	0.228319	1
																			0.940864	0.536025	0	0.217412	0.238695	0.181734	0.00469581	0.760025	0.506313	0.394793	0.44088	0.0934398	0.113963	0.104215	0.325046	0.178775	0.525557	1
																			0.401176	0.26869	0	0.047845	0.0124258	0.0998636	0.0170399	0.10553	0.17725	0.29261	0.537433	0.658447	0.605428	0.102675	0	0.191302	0.449726	1
																			0.315993	0.0969529	0.108142	0.00352174	0.0111985	0.0343961	0.0379262	0.0293372	0.037764	0.148052	0.116503	0.0683327	0.0548032	0.0471384	0	0	0	1
																			0.942071	0	0.00388048	0	0.129697	0.117469	0.356565	0.19359	0.0426712	0.126294	0.0264642	0.0876346	0.0687046	0	0	0.192019	0.0520665	1
																			0.718981	0.162455	0.0230714	0	0.326845	0.214656	0.804978	0.656112	0.414485	0.332113	0.639225	0.763746	0.382267	0.917351	0.670947	0.0670947	0.45961	1
																			0.375743	0.0291385	0.00739275	0.229374	0.212116	0.0836637	0.268837	0.319465	0.533027	0.624899	0.107857	0.143525	0.158312	0.249738	0	0.3106	0.845311	1
																			0.473779	0.202561	0.650182	0.517559	0.0339073	0	0.0030249	0.358714	0.0677437	0.44463	0.849331	0.523084	0.0625101	0.11836	0	0.0538742	0.380606	1
																			0.406649	0.127984	0.116204	0.222765	0.256895	0.00972888	0.058505	0.113202	0.190814	0.120924	0.0613167	0.0568383	0	0	0.187792	0.941576	0.870315	1
																			0.242446	0	0.0446797	0	0.464925	0	0.7378	0.245608	0.184462	0.0676965	0.101269	0.370914	0.609706	0.664932	0	0.589756	0	1
																			0.179265	0.127324	0.141714	0.0166816	0.0736422	0.251064	0.344112	0.17343	0.234848	0.144959	0.0355023	0.250067	0	0.395941	0	0	0.447865	1
																			0.401017	0.276021	0.127943	0.0132127	0.408837	0.149865	0.279695	0.0254211	0.0293772	0.0178252	0.00297975	0.299144	0.242843	0.374925	0.090575	0.122259	0.243441	1
																			0.678472	0	0.0121416	0	0.524535	0.950612	0.053205	0.708963	0.53455	0.0809945	0.223859	0.883051	0.633938	0.190248	0	0	0.449347	1
																			0.389984	0	0.289991	0.888237	0.377551	0.568494	0.8932	0.15878	0.479488	0.201578	0.186698	0.543316	0.571911	0.917463	0.278623	0	0.70865	1
																			0.93995	0	0	0	0	0.262573	0.0350335	0.524027	0.104279	0.162555	0.380413	0.127095	0.092321	0	0	0	0.0316114	1
																			0.434464	0	0	0	0	0.330456	0.0835915	0.229822	0.363079	0.174142	0.031036	0.29349	0.00387001	0	0	0.0259521	0.851738	1
																			0.493024	0.368582	0	0	0	0.138329	0.782033	0.30481	0.119677	0.212022	0.507495	0.402106	0.0600677	0	0	0	0	1
																			0.108657	0	0.500156	0.10463	0	0	0	0.186303	0.0326809	0.161025	0.141615	0	0	0.354231	0	0	0.521787	1
																			0.381882	0	0.00650585	0	0.022082	0.0581672	0.0513121	0.133531	0.521025	0.370443	0.0315176	0.16293	0.00716283	0.120753	0	0.0469482	0.113654	1
																			0.0802299	0	0	0	0	0	0	0	0	0	0	0	0	0	0	0	0	1
																			0.441061	0	0	0	0	0.0654815	0.0286817	0.135297	0.135274	0	0	0.264799	0	0	0	0	0	1
																			0.321495	0.056706	0.0061665	0	0	0.0321318	0.00215373	0.202896	0.0666376	0.0215976	0	0	0.0431335	0	0	0.0915416	0	1
																			0.272806	0.170806	0.158991	0.519372	0.717086	0.250602	0.180197	0	0.289501	0.0979327	0	0.21256	0.0451954	0.352095	0.523413	0	0.0794344	1
																			0.187309	0	0	0.051192	0.180549	0.918879	0.57936	0.108716	0.240855	0.720149	0.247742	0.587306	0.180204	0.36248	0	0	0	1
																			0.31829	0.0431462	0.399166	0.0415132	0	0.0171878	0.522564	0.059767	0.0806139	0.537131	0.0925026	0.375422	0.0445461	0.00777926	0.0783977	0.548784	0.0636981	1
																			0.286183	0	0	0.0675069	0.0480156	0.134442	0.0698302	0.0660978	0.122901	0.106413	0.0175591	0.201822	0.0307637	0.0456222	0	0	0	1
																			0.370298	0.103914	0	0	0.0814367	0.270777	0.273782	0.0010666	0.121468	0	0.0991687	0.207358	0.0300548	0.172674	0	0	0	1
																			0.444522	0.77878	0.265432	0.715276	0.354653	0.323604	0.249085	0.238256	0.230356	0.160312	0.0625784	0.0658177	0.347383	0.227971	0	0	0	1
																			0.323253	0.859797	0.233824	0.138424	0.385541	0.598171	0.216812	0	0.0753103	0.163811	0.0905424	0.0925145	0	0	0	0	0	1
																			0.554426	0.226917	0.214566	0.197967	0.259833	0.0859633	0.278524	0.235383	0.491993	0.313986	0.625406	0.461882	0.209836	0.673928	0.0736347	0.537886	0.746697	1
																			0.472631	0	0.262417	0	0.292416	0.0364991	0.0197406	0.0636373	0.0137563	0.0978805	0.117309	0.357983	0.261695	0.239886	0	0	0.171441	1
																			0.352831	0	0.0312089	0	0.288499	0.226404	0.577466	0.0175931	0.824759	0.226583	0.2282	0.0277202	0	0.0641569	0	0	0.429189	1
																			0.184869	0.0256528	0	0	0	0.086982	0	0.11173	0.218201	0.44881	0.0508177	0.0182786	0	0	0	0.0820133	0.273147	1
																			0.494479	0.407608	0.00894762	0	0.262029	0.947405	0.796578	0.883698	0.180114	0.341968	0.374913	0.563496	0.286164	0.339383	0.30731	0.918896	0.879016	1
																			0.567799	0	0.146678	0.0859164	0	0.485595	0.493049	0.328204	0.912586	0.403556	0.392958	0.762513	0.313624	0.708863	0.175421	0.273745	0.29083	1
																			0.583901	0.0971461	0.370059	0.187099	0.06579	0.111812	0	0.149547	0.26628	0.385656	0.128784	0.150803	0.357396	0.0124088	0.127867	0.151292	0.272487	1
																			0.744636	0.567198	0.716184	0.4383	0.170845	0.39077	0.707993	0.591302	0.42074	0.283816	0.17029	0.272127	0.376503	0.614801	0	0.109204	0.059152	1
																			0.239728	0.0217989	0.187463	0.0513423	0.11022	0.15279	0.120144	0.396071	0.528855	0.431678	0.619788	0.998475	0.725578	0.217128	0.821166	0.21038	0.126142	1
																			0.719649	0	0.0850758	0.238955	0.357464	0.374986	0	0.0276336	0.169961	0.853522	0.686333	0.34779	0.702068	0.132571	0.278892	0.188524	0.0426002	1
																			0.617799	0.33901	0.555494	0.307555	0.275095	0.350261	0.369418	0.0957487	0.306007	0.11444	0.0953652	0.189191	0.191955	0.0646139	0	0.00274217	0.0714807	1
																			0.940885	0.0919022	0.477869	0.210248	0.115048	0.117997	0	0.821441	0.894797	0.963846	0.391958	0.521599	0	0	0.545212	0.817958	0.663548	1
																			0.272132	0.111464	0.136743	0.563812	0	0	0	0.0203392	0.0435973	0.273511	0.375715	0.277403	0.15316	0.675356	0.347334	0.198778	0.259829	1
																			0.655448	0	0	0.0587679	0	0	0	0.0634768	0.0650919	0	0.0334558	0.0383111	0	0.012875	0	0.000801162	0	1
																			0.510928	0.325154	0.508956	0.0155223	0.00852932	0.744278	0.105422	0.216466	0.506261	0.158696	0.305168	0.753986	0.723323	0.550703	0.520338	0.869863	0.521742	1
																			0.238674	0.208161	0	0.480708	0.442418	0.910812	0.361123	0.310141	0.171862	0.216404	0.050646	0.0336319	0	0.287312	0.0689609	0.778508	0.897044	1
																			0.410137	0.0143793	0.0122224	0.000672617	0.0877637	0.00279489	0	0	0.0346165	0	0	0.0462198	0	0.0368605	0.00716243	0.0048902	0.107173	1
																			0.680166	0.0847658	0.0594198	0.0503117	0.0835523	0.0380036	0.330635	0.362645	0.356653	0.208525	0.107074	0.0389044	0.224853	0.0200223	0.123653	0.395051	0.659126	1
																			0.168507	0	0.322571	0.129017	0.0162842	0.00271172	0	0	0.0134425	0.0347448	0.212444	0.126338	0.327085	0.0660913	0.141722	0.487491	0.512549	1
																			0.505358	0	0.324953	0.154893	0.313224	0.112618	0.0768799	0	0.13569	0.189327	0.224834	0.940253	0.582512	0.0338025	0.41645	0.282711	0.103494	1
																			0.160792	0	0	0.129305	0.0185511	0.872985	0.849516	0.0783695	0.164331	0.32999	0.426535	0.681793	0.742014	0.16916	0.206188	0.284199	0.258753	1
																			0.680687	0.201131	0.187426	0.139157	0.0471241	0	0.0468981	0.0724289	0.0373688	0.0340417	0.122709	0.149227	0.079349	0.0468193	0.0272585	0.0950223	0.220171	1
																			0.156341	0.0858577	0.134176	0.0637829	0.201295	0.00515521	0	0.192712	0.0235364	0.00237612	0.0110735	0.0575108	0.0946863	0.186305	0.00430547	0.0576987	0.323672	1
																			0.353521	0.137	0.466034	0.741464	0.274169	0.108656	0.483432	0.266948	0.356702	0.058145	0.0985956	0.123008	0.128315	0.0924929	0.0420289	0.00422291	0.0516332	1
																			0.498783	0.083075	0.0894215	0.049752	0.0886959	0.0162704	0.0630958	0.146266	0.0620395	0.127254	0	0	0.0355553	0.194969	0	0.0135134	0.00255871	1
																			0.364342	0	0.0369109	0.0458082	0.114884	0	0	0	0.601686	0.688779	0.429371	0.00665266	0.0122259	0.102168	0	0.00668299	0.0530614	1
																			0.519828	0	0.0275468	0.0293616	0	0.0321201	0.112136	0.26165	0.871024	0.240698	0	0.181015	0.0263602	0.0840449	0.120632	0.216192	0.61266	1
																			0.387845	0	0.107286	0	0.0765883	0	0	0.0490736	0.070475	0	0	0	0	0.0288558	0	0.00479568	0.0164076	1
																			0.745659	0.0441724	0.348166	0.203038	0.133143	0.0160369	0	0	0.296112	0.0681708	0.0497561	0.068667	0.0357762	0.0140453	0	0.163953	0.115295	1
																			0.636592	0	0.294266	0.331936	0.358469	0	0.19597	0	0.0563452	0	0.0220113	0	0.0324264	0.287254	0.0362712	0.0633292	0.00406688	1
																			0.74749	0.0447436	0	0.213506	0.100801	0.00316074	0.096192	0.505078	0.258233	0.172331	0.973179	0.302912	0.299648	0.146329	0	0.0897745	0.0832732	1
																			0.260558	0	0	0.031834	0.0374092	0	0	0	0.0513677	0.163603	0	0	0	0.0380695	0	0	0	1
																			0.626371	0	0	0.00407552	0.0767062	0	0	0	0.134292	0.0264573	0.00928766	0	0.0559221	0.052589	0	0.0035162	0.0282427	1
																			0.42449	0.0113221	0.147578	0.20559	0.0918693	0	0.379442	0.212019	0.254098	0.175056	0.579059	0	0.273	0.66336	0.238527	0.000285017	0.008235	1
																			0.515584	0	0	0.00255846	0.00577345	0	0	0	0.0770125	0.176334	0	0	0	0	0	0	0	1
																			0	0	0.833591	0.163705	0	0	0	0	0	0.274478	0.665401	0	0	0	0.767914	0	0.0215371	1
																			0.68369	0.265695	0.432484	0.333089	0.0287032	0.13867	0.371104	0.102521	0.154824	0.031591	0.00671302	0.17075	0.194618	0.163172	0.124115	0.107259	0.0468088	1
																			0.519893	0.211425	0.234611	0.085324	0.134171	0.180981	0.145292	0.299056	0.278519	0.110527	0.651902	0.485214	0.207856	0.342501	0.226557	0.268134	0.269031	1
																			0.738821	0.144053	0.1159	0.130561	0.383099	0.541627	0.169028	0.118578	0.820111	0.567122	0.0458329	0.447866	0.572532	0.0419494	0	0.477138	0.246321	1
																			0.195628	0.351448	0.253699	0.980236	0.0307749	0	0.153202	0.758156	0.771685	0.734323	0.664507	0.799543	0.295287	0.287998	0.769953	0.534411	0.946054	1
																			0.131529	0.218814	0.936019	0.0245927	0.00985422	0.752796	0.051983	0.296645	0.445584	0.122451	0.327926	0.798883	0.765428	0.499778	0.400906	0.0029775	0.15563	1
																			0.896845	0.273796	0.366513	0.159355	0.178701	0.0157298	0	0.0119565	0.659119	0.369415	0	0.103176	0.58555	0.0770702	0	0.0040873	0.54749	1
																			0.902865	0.0992343	0	0.0540236	0.0239896	0.0210004	0	0	0.233059	0.348376	0	0.0378126	0.15214	0	0	0.462236	0.345732	1
																			0.573754	0.536827	0.124326	0.237425	0.42073	0.610269	0.0793536	0.4728	0.429802	0.412229	0.198776	0.0996195	0.14812	0.650867	0.222678	0.193701	0.671673	1
																			0.382672	0.0427265	0.361262	0.0907024	0.0828069	0.0801434	0	0	0.102136	0	0.0475052	0.542884	0.222864	0	0.540247	0.415696	0.0162524	1
																			0	0.0384019	0.591438	0.461158	0.0162062	0	0	0	0.0430974	0	0.102565	0.0173726	0.169456	0.0935833	0.33931	0.0239357	0.00810729	1
