# Supplementary material for: Adolescent neurostimulation of dopamine circuit reverses genetic deficits in frontal cortex function
Source: eLife. 2023 Oct 13;12:RP87414. doi: 10.7554/eLife.87414 (PMC10575630; doi:10.7554/eLife.87414)
Supplement: Figure 3—source data 1. [file elife-87414-fig3-data1.xlsx]

## Sheet: Sheet1
Figure 3c			Figure 3e			Figure 3f					Figure 3 - figure supplement 1c
Ctrl	Gq		Ctrl	Gq		Ctrl	Gq			CNO-SAL							CNO-SCH							SAL-SAL
17.524	80.8424		1.28789	1.30333		1.13322	0.950116		S1	0.0432194	0.0549847	0.1902	0.995759	0.605571	0.184105	0.47196	0.116777	0.0815098	0.0805492	0.165675	0.833987	0.453618	0.332854	0.253039	-0.0954529	-0.104594	-0.140675	-0.172053	0.160065	-0.0898009
-16.8198	20.465		1.27913	1.45681		1.08766	1.09867		S2	0.229627	-0.00105405	0.0706758	0.194536	0.732969	0.142769	0.342468	-0.299536	-0.0447894	-0.299487	-0.279633	-0.106957	-0.177121	-0.280948	0.0922573	0.132502	-0.152023	-0.0831561	-0.132585	0.151941	0.314312
10.5068	102.868		1.388	0.882548		1.23465	1.36161
10.7843	51.6792		0.74943	2.08028		1.01663	1.27091		ANOVA table		SS	DF	MS	F (DFn, DFd)		P value		Šídák's multiple comparisons test
12.1423	139.016		0.809478	1.04916		0.858088	1.11935		Time x Treatment		0.6129	2	0.3065	F (2, 18) = 8.982		P=0.0020		S1 - S2	Adjusted P Value
86.026	97.7685		0.595099	0.894051		0.935789	1.11664		Time		0.3574	1	0.3574	F (1, 18) = 10.48		P=0.0046		CNO-SAL	0.5667
			1.13068	1.94868		0.923593	1.2168		Treatment		0.7323	2	0.3661	F (2, 18) = 4.947		P=0.0194		CNO-SCH	0.0002
			0.90112	0.519724		0.758034	1.25002		Subject		1.332	18	0.07402	F (18, 18) = 2.169		P=0.0547		SAL-SAL	0.8492
			1.06225	0.44653		1.07098	1.03226		Residual		0.6142	18	0.03412
			0.796927	1.32576		0.981354	1.58826
P value	0.0183		P value	0.334		P value	0.0128
t	2.814		t	0.9927		t	2.763
df	10		df	18		df	18
Figure 3h
Time	Ctrl 1 pulse						Gq 1 pulse						Ctrl 5 pulses						Gq 5 pulses						Ctrl 10 pulses						Gq 10 pulses
20	0.020778	0.019015	0.061357	-0.00985	-0.01928	-0.01893	0.020104	0.001507	0.039469	0.049715	-0.1381	0.036559	8.22e-05	-0.01131	-0.02116	-0.01878	-0.03065	0.002623	-0.02107	-0.00177	0.042843	0.011077	-0.05197	0.006684	-0.0125	0.003736	0.004755	0.002272	-0.06296	-0.01709	-0.0082	0.056774	-0.0627	0.004596	-0.0045	-0.00664
20.351	0.020488	0.022654	0.062121	-0.01736	-0.00592	-0.00686	0.039521	-0.00894	0.027024	0.047751	-0.07905	0.02899	0.008027	0.004601	-0.01261	0.003325	-0.0174	0.023345	0.048429	-0.01509	0.073778	0.03342	0.036886	0.020064	0.011752	0.016309	0.015818	0.02532	-0.06288	-0.0053	0.095262	0.038087	-0.0039	0.074934	0.234324	0.011816
20.702	0.057011	0.025314	0.063351	0.003639	0.013372	-0.00931	0.081463	-0.01709	0.054773	0.087379	0.014939	0.028386	0.064974	0.094104	0.020291	0.097108	0.042532	0.053974	0.234453	0.012633	0.308521	0.081328	0.353037	0.149416	0.052509	0.096331	0.049215	0.14954	0.038227	0.046942	0.319943	0.059373	0.331908	0.198891	0.913668	0.295974
21.053	0.122487	0.056899	0.079718	0.036099	0.025877	-0.01064	0.132333	0.014361	0.106732	0.108926	0.095137	0.024556	0.11726	0.177701	0.042391	0.157119	0.075818	0.046418	0.250823	0.05638	0.39676	0.06528	0.457478	0.28732	0.068367	0.172055	0.058436	0.238618	0.110323	0.056669	0.329031	0.07932	0.421472	0.165962	1.05563	0.559058
21.404	0.118105	0.07055	0.087317	0.05217	0.014271	-0.01252	0.149057	0.038449	0.141929	0.104189	0.109047	0.01529	0.111931	0.206187	0.053621	0.170207	0.079547	0.035414	0.227149	0.067314	0.365861	0.05699	0.402228	0.374599	0.09118	0.185596	0.068585	0.280286	0.129188	0.042937	0.286509	0.091866	0.405232	0.134553	0.947707	0.638431
21.755	0.109881	0.068643	0.084038	0.051152	0.005618	-0.00589	0.137203	0.051589	0.179187	0.083115	0.065632	0.011521	0.105791	0.206875	0.067346	0.169052	0.064809	0.028003	0.178984	0.072276	0.350299	0.045363	0.32203	0.400296	0.078557	0.18499	0.082375	0.308175	0.107863	0.039438	0.240896	0.106673	0.367932	0.114088	0.802524	0.666524
22.106	0.111981	0.059484	0.070811	0.040883	0.002761	0.004405	0.106111	0.061685	0.194381	0.062174	0.012871	0.01538	0.091344	0.18877	0.0737	0.160086	0.044529	0.015619	0.152281	0.072485	0.332524	0.029261	0.308557	0.384928	0.051349	0.173679	0.086419	0.320939	0.083398	0.02751	0.195805	0.110553	0.338226	0.112945	0.690723	0.638301
22.457	0.099471	0.045712	0.046433	0.027984	-0.00751	0.002084	0.090564	0.065774	0.193819	0.055698	-0.0386	0.018466	0.074859	0.166262	0.083127	0.145492	0.029772	0.003212	0.157401	0.067818	0.310052	0.043807	0.326557	0.348207	0.043117	0.154855	0.079996	0.315887	0.065592	0.014734	0.174016	0.10499	0.3351	0.121834	0.627187	0.590417
22.808	0.077097	0.035104	0.022546	0.013357	0.000823	0.003766	0.072404	0.07049	0.171036	0.056211	-0.0779	0.022541	0.074765	0.153497	0.094996	0.122474	0.012355	-0.00825	0.166149	0.059499	0.298145	0.060715	0.305453	0.305281	0.033634	0.137257	0.085108	0.299635	0.062946	0.016664	0.156117	0.106913	0.325906	0.114925	0.610411	0.536652
23.159	0.060143	0.022903	0.012668	-0.00036	0.008281	0.002903	0.050519	0.069324	0.162431	0.042199	-0.11193	0.034786	0.05548	0.141036	0.111601	0.096626	-0.01762	-0.01555	0.163248	0.050341	0.29746	0.077136	0.254109	0.275153	0.030258	0.126134	0.092248	0.280235	0.048717	0.009068	0.160666	0.10432	0.340399	0.134664	0.613313	0.477365
23.51	0.042998	0.013476	-0.0002	-0.0112	0.018753	0.002373	0.038081	0.059473	0.148161	0.029809	-0.1465	0.042414	0.053547	0.125413	0.124571	0.070691	-0.02651	-0.01914	0.142643	0.039503	0.287348	0.080289	0.196293	0.24896	0.032605	0.123971	0.093729	0.251861	0.035878	-0.00299	0.168589	0.09714	0.329963	0.153273	0.588773	0.4167
23.861	0.028553	0.003344	0.004549	-0.01465	0.015063	-0.00449	0.019374	0.045069	0.125046	0.020647	-0.16641	0.04193	0.04728	0.107197	0.116734	0.052763	-0.0302	-0.02242	0.110855	0.033237	0.26536	0.076563	0.128512	0.222553	0.030286	0.116171	0.097545	0.220648	0.026741	-0.00777	0.18097	0.09582	0.298603	0.155036	0.567804	0.376413
24.212	0.018038	-0.00348	0.008741	-0.01805	-0.0006	-0.00785	0.010601	0.034415	0.114385	0.013722	-0.17714	0.038687	0.042077	0.086413	0.103093	0.048964	-0.03258	-0.02564	0.082342	0.034786	0.229939	0.069283	0.085345	0.210668	0.012994	0.097863	0.088726	0.197646	0.015688	-0.01234	0.181548	0.081637	0.265055	0.159834	0.532542	0.340068
24.563	0.007991	-0.01311	0.016972	-0.02303	-0.01995	0.003448	0.005506	0.020375	0.090921	0.023875	-0.1355	0.035097	0.034297	0.051711	0.086066	0.043311	-0.04563	-0.01926	0.068571	0.030362	0.199566	0.059354	0.065612	0.188653	0.00082	0.080413	0.071703	0.177153	0.012647	-0.01585	0.183428	0.075042	0.228709	0.14113	0.497145	0.297852
24.914	0.016546	-0.0076	0.027455	-0.03006	-0.0291	0.011669	0.008168	0.01301	0.069061	0.027902	-0.07689	0.027072	0.042498	0.02545	0.074573	0.033649	-0.05632	-0.01988	0.055666	0.021188	0.167348	0.051202	0.043789	0.165236	-0.00082	0.062269	0.058731	0.150786	0.004181	-0.01542	0.178791	0.062186	0.202198	0.1228	0.449831	0.273152
25.265	0.02703	-0.00734	0.031375	-0.03001	-0.01601	0.014837	0.01714	0.00249	0.05635	0.040929	-0.06163	0.021967	0.059366	0.003771	0.068154	0.017299	-0.05072	-0.02455	0.048809	0.013836	0.134029	0.049531	0.042487	0.146665	0.002065	0.046977	0.042755	0.131077	-0.00497	-0.01882	0.165556	0.04605	0.192806	0.120083	0.394129	0.238571
25.616	0.027629	-0.00727	0.047534	-0.02702	0.010512	0.007515	0.026177	-0.00095	0.06108	0.03764	-0.07689	0.014547	0.046167	-0.012	0.068147	-0.004	-0.04226	-0.02157	0.044368	0.00212	0.110646	0.037349	0.074207	0.129155	-0.00255	0.02758	0.025094	0.111071	-0.00183	-0.01934	0.160491	0.040672	0.166585	0.109985	0.347907	0.21964
25.967	0.025664	-0.00597	0.052106	-0.01948	0.011579	-0.00011	0.028553	0.001561	0.072766	0.040649	-0.08907	0.009966	0.02492	-0.02929	0.072826	-0.01746	-0.04501	-0.02472	0.044109	-0.00523	0.090344	0.039467	0.091444	0.111744	-0.02088	0.017474	0.00583	0.097041	-0.01239	-0.02463	0.146157	0.037328	0.142113	0.09864	0.322914	0.197895
26.318	0.02967	-0.01044	0.05002	-0.00963	0.004475	-0.00375	0.028626	-0.00143	0.068133	0.037991	-0.1108	0.006541	0.016055	-0.04597	0.073571	-0.03094	-0.04353	-0.02532	0.035561	-0.01021	0.074673	0.03657	0.09102	0.100247	-0.047	0.010849	-0.00587	0.085187	-0.02496	-0.03054	0.14458	0.03268	0.135669	0.095264	0.317201	0.167582
26.669	0.02061	-0.01335	0.050648	-0.00877	0.003277	0.00311	0.020987	0.003807	0.062582	0.049074	-0.11778	0.005792	0.007639	-0.05962	0.064713	-0.04023	-0.02999	-0.02032	0.015276	-0.01039	0.073749	0.035646	0.081386	0.092276	-0.05723	-0.00914	-0.01465	0.06787	-0.02775	-0.03297	0.163789	0.025752	0.144051	0.084739	0.310185	0.148521
27.02	0.009779	-0.00382	0.051025	-0.01399	-0.00387	0.005351	0.015196	0.009035	0.05542	0.04419	-0.13216	-0.00121	-0.00872	-0.06344	0.06067	-0.04916	-0.02911	-0.01113	-0.00146	-0.00789	0.088189	0.043593	0.076851	0.073924	-0.07234	-0.02641	-0.02727	0.051737	-0.03147	-0.03396	0.164545	0.02335	0.133553	0.061002	0.304177	0.130559
27.371	0.005415	0.005873	0.043144	-0.0204	0.004316	0.004167	0.01012	0.009736	0.039361	0.03383	-0.15748	-0.00458	-0.01951	-0.05708	0.059536	-0.05438	-0.02679	-0.01189	0.001091	-0.01083	0.108191	0.060409	0.072154	0.051395	-0.08166	-0.03505	-0.03231	0.035092	-0.03686	-0.0326	0.147425	0.025883	0.108571	0.046203	0.318717	0.115371
27.722	-0.00425	0.013204	0.035461	-0.02918	0.005186	0.003822	0.015535	0.012519	0.033135	0.026794	-0.17952	-0.00669	-0.03069	-0.04262	0.051543	-0.05174	-0.0139	-0.00597	0.009782	-0.01431	0.138067	0.046772	0.050658	0.045224	-0.08784	-0.04095	-0.03462	0.020681	-0.04159	-0.03158	0.124039	0.022856	0.083006	0.039212	0.283627	0.088869
28.073	-0.00098	0.025695	0.02719	-0.03127	0.01333	-0.00123	0.026963	0.010943	0.026914	0.015268	-0.18915	-0.01283	-0.03276	-0.03599	0.05438	-0.04795	-0.02529	-0.00501	0.011941	-0.01634	0.166203	0.043857	0.033389	0.036003	-0.09086	-0.0461	-0.03757	0.014739	-0.04208	-0.02981	0.107167	0.016609	0.060713	0.029915	0.252118	0.085071
28.424	-0.00613	0.031805	0.021326	-0.0361	0.014733	-0.00587	0.029164	0.010542	0.015081	0.022512	-0.17633	-0.01748	-0.03952	-0.04331	0.054676	-0.05252	-0.02593	-0.00595	0.015023	-0.0231	0.185065	0.04027	0.028072	0.025285	-0.08899	-0.05725	-0.0361	0.013955	-0.04682	-0.02483	0.086773	0.023366	0.052472	0.015756	0.229382	0.097549
28.775	-0.00322	0.036989	0.021525	-0.03679	0.002621	-0.01131	0.026057	0.004137	0.006192	0.009066	-0.14363	-0.01006	-0.02878	-0.04344	0.056011	-0.05799	-0.0286	0.009155	0.013084	-0.03329	0.179064	0.036194	0.02279	0.020783	-0.09426	-0.06323	-0.0416	0.013669	-0.06558	-0.0198	0.061221	0.01741	0.040073	0.017193	0.210344	0.105371
29.126	-0.00858	0.040902	0.017398	-0.03482	0.00318	-0.0136	0.014787	0.003246	-0.00273	0.008161	-0.1209	-0.00258	-0.00675	-0.02325	0.058684	-0.06048	-0.03782	0.015898	-0.00382	-0.02761	0.174911	0.031439	0.02082	0.023664	-0.10346	-0.0618	-0.03631	0.003004	-0.06453	-0.02616	0.047432	0.00497	0.025818	0.012867	0.207855	0.118004
29.477	-0.00464	0.03837	0.015707	-0.02815	-0.00749	-0.01573	0.002088	0.003477	-0.00545	0.005558	-0.09592	-0.00094	0.006947	-0.00974	0.055571	-0.0634	-0.03533	0.019844	-0.01134	-0.0221	0.168842	0.036858	0.054996	0.040519	-0.11219	-0.05258	-0.03426	-0.01291	-0.06868	-0.02407	0.0295	-0.0008	0.013735	0.01733	0.171495	0.116812
29.828	-0.00806	0.030487	0.012131	-0.02254	-0.01552	-0.01576	-0.00933	0.002703	-0.01406	0.015651	-0.08397	-0.0023	0.005108	-0.00679	0.040356	-0.06584	-0.01982	0.022521	-0.01776	-0.01505	0.160893	0.036536	0.107976	0.036061	-0.11194	-0.03604	-0.02781	-0.02711	-0.06229	-0.02214	0.022533	-0.00392	0.004373	0.013671	0.14263	0.112151
30.179	-0.00465	0.025338	0.011725	-0.01822	-0.02589	-0.02135	-0.00551	0.002366	-0.02511	0.016357	-0.09525	0.001738	-0.00158	-0.00276	0.025852	-0.06286	-0.00832	0.025519	-0.02096	-0.0063	0.144621	0.031239	0.113451	0.025277	-0.10351	-0.01583	-0.02703	-0.03704	-0.04878	-0.01824	0.019904	-0.00734	-0.00195	0.011476	0.122382	0.101596
30.53	-0.01601	0.013454	0.016237	-0.02258	-0.02323	-0.02146	-0.00404	0.015021	-0.03091	0.005267	-0.10781	0.008985	-0.00704	-0.00464	0.016816	-0.051	-0.01107	0.040445	-0.03361	-0.00122	0.134532	0.019128	0.127728	0.01664	-0.10162	-0.00224	-0.02003	-0.04597	-0.03872	-0.02199	0.010457	-0.00271	-0.00298	0.002302	0.109857	0.086314
30.881	-0.01071	0.005321	0.014305	-0.02918	-0.00756	-0.02234	-0.01014	0.013388	-0.03327	-0.0057	-0.09863	0.011966	-0.01093	-0.0098	0.015671	-0.04834	-0.01926	0.036264	-0.03922	-0.00262	0.125149	0.013922	0.113246	0.019294	-0.1047	-0.00808	-0.01311	-0.05114	-0.04001	-0.01174	0.009954	0.001683	0.00481	-0.00097	0.115164	0.062193
31.232	-0.00469	0.007675	0.019297	-0.03863	-0.00723	-0.02107	-0.01284	0.011767	-0.03229	-0.00091	-0.07892	0.01424	-1.7e-05	-0.01851	0.024669	-0.04864	-0.02315	0.038733	-0.03729	-0.00999	0.116281	0.009032	0.097004	0.018082	-0.09775	-0.0149	-0.00817	-0.05613	-0.04563	-0.00332	0.023204	0.019573	0.005152	-0.00677	0.121875	0.046904
31.583	0.004218	0.014942	0.022713	-0.0431	-0.01553	-0.02085	-0.01511	0.008546	-0.03152	0.005236	-0.02801	0.010755	-0.00954	-0.02231	0.025691	-0.05162	-0.0237	0.03937	-0.04229	-0.02027	0.105897	0.007907	0.08066	0.012094	-0.09004	-0.02119	-0.01026	-0.06085	-0.05001	-0.00103	0.022236	0.023978	0.002844	-0.0022	0.122181	0.040996
31.934	0.002057	0.016419	0.029482	-0.04484	0.001479	-0.00986	-0.02575	0.004066	-0.03009	0.007288	0.018781	-0.00029	-0.01599	-0.03228	0.023445	-0.06044	-0.02838	0.040104	-0.05199	-0.02378	0.095617	-0.00027	0.058382	0.012511	-0.08048	-0.01441	-0.01181	-0.06423	-0.04865	-0.00313	0.016882	0.020447	0.016745	0.008759	0.103271	0.039655
32.285	0.001186	0.018343	0.032389	-0.04706	-0.00339	-0.00808	-0.02847	0.00663	-0.03171	0.009456	0.009576	-0.00455	-0.0178	-0.03884	0.024638	-0.06505	-0.01584	0.040923	-0.05768	-0.02813	0.086194	-0.00444	0.036122	0.001872	-0.08727	-0.00263	-0.02533	-0.06219	-0.04498	-0.002	0.007065	0.029957	0.031829	-0.00106	0.079407	0.04705
32.636	-0.01262	0.031572	0.034519	-0.05059	-0.00732	-0.00759	-0.02382	0.005784	-0.03023	0.000381	0.009329	-0.00368	-0.02314	-0.03501	0.020552	-0.0727	-0.00782	0.029802	-0.06584	-0.02864	0.087904	0.012108	0.015105	-0.00247	-0.08365	0.005429	-0.02341	-0.05287	-0.04096	-0.00262	0.010665	0.035043	0.042026	-0.01058	0.054264	0.076085
32.987	-0.01941	0.044498	0.02848	-0.05495	-0.00457	-0.00809	-0.02423	-0.00038	-0.02203	-0.01579	0.001591	-0.00566	-0.01806	-0.02691	0.02648	-0.07679	-0.02627	0.01744	-0.05258	-0.02418	0.089861	0.005373	0.009172	-0.01289	-0.08142	0.006181	-0.01375	-0.04167	-0.04643	0.006035	0.030012	0.03823	0.055005	-0.02597	0.034951	0.084329
33.338	-0.02047	0.042489	0.022499	-0.0611	-0.01567	-0.00971	-0.0222	-0.00576	-0.01594	-0.00533	0.012777	-0.0108	-0.02385	-0.02454	0.02706	-0.07784	-0.03282	0.007238	-0.03415	-0.02112	0.081247	0.007726	0.009819	-0.01092	-0.08542	-0.0013	-0.00733	-0.03025	-0.05083	0.007937	0.043456	0.041559	0.068186	-0.03739	0.01505	0.110324
33.689	-0.01422	0.051602	0.016002	-0.06654	-0.03032	-0.00557	-0.02616	-0.01408	-0.02099	-0.0046	0.020027	-0.01573	-0.02369	-0.01876	0.024427	-0.07824	-0.03475	-0.00018	-0.0364	-0.00975	0.075165	0.001752	0.016588	-0.01135	-0.09204	-0.0084	-0.01041	-0.01661	-0.06689	0.003086	0.02393	0.039779	0.081944	-0.02569	0.021547	0.118873
34.04	-0.00392	0.062218	0.010571	-0.07242	-0.04008	-0.0102	-0.02826	-0.01912	-0.02606	-0.00297	0.034709	-0.01005	-0.02948	-0.01557	0.019517	-0.07532	-0.02727	-0.00268	-0.03297	0.003506	0.086728	-0.00254	0.075487	-0.01564	-0.08794	-0.01829	-0.02081	-0.01399	-0.07763	0.001192	0.002954	0.050665	0.087006	-0.02535	0.018104	0.120204
34.391	0.015901	0.060287	0.004927	-0.0607	-0.05653	-0.01243	-0.01857	-0.02658	-0.03115	-0.00819	0.033775	-0.00174	-0.03539	-0.01228	0.01688	-0.0753	-0.03665	-0.01053	-0.0345	0.010324	0.098561	8.57e-05	0.13585	-0.01826	-0.09206	-0.02954	-0.02214	-0.00499	-0.08012	-0.00193	-0.00637	0.048237	0.086841	-0.01696	0.042883	0.120631
34.742	0.023972	0.050967	0.00114	-0.0433	-0.05212	-0.01715	-0.01597	-0.03108	-0.03428	-0.01082	0.024841	-0.00162	-0.02918	-0.00965	0.014908	-0.07873	-0.04715	-0.00921	-0.03486	0.015044	0.09393	0.005503	0.128135	-0.01427	-0.09633	-0.03335	-0.01673	0.004322	-0.08572	0.001217	-0.01575	0.044769	0.068723	-0.01854	0.130333	0.117524
35.093	0.011612	0.049633	0.003728	-0.02075	-0.0481	-0.01684	-0.01857	-0.03107	-0.03697	0.000916	0.020383	0.000902	-0.02035	-0.00978	0.00221	-0.08736	-0.04067	-0.00757	-0.03152	0.020295	0.092645	0.015291	0.061612	-0.01446	-0.09221	-0.03693	-0.01766	0.012631	-0.0855	0.006877	-0.03012	0.046591	0.060206	-0.01974	0.201071	0.109964
35.444	0.021311	0.045845	0.006491	-0.00242	-0.0514	-0.01984	-0.00935	-0.03423	-0.0396	-0.00101	0.030148	0.006894	-0.02005	0.003509	-0.00912	-0.09431	-0.03109	-0.01611	-0.02692	0.025488	0.087476	0.007562	-0.00571	-0.01934	-0.07605	-0.03956	-0.02622	0.023125	-0.08042	0.006932	-0.02622	0.053177	0.057536	-0.02157	0.179902	0.084183
35.795	0.033956	0.041666	0.016659	0.011876	-0.04472	-0.00448	0.003891	-0.03093	-0.04299	-0.0092	0.035115	0.012862	-0.03209	0.022438	-0.01409	-0.09515	-0.03602	-0.02068	-0.0326	0.022871	0.074375	-0.00018	-0.05388	-0.0217	-0.07481	-0.04172	-0.03877	0.033051	-0.10123	-0.00179	-0.01098	0.054915	0.059679	-0.03365	0.143489	0.082193
36.146	0.040036	0.038502	0.017082	0.01478	-0.04693	-0.00678	0.016475	-0.02661	-0.04274	-0.01073	0.014991	0.014416	-0.03154	0.025765	-0.01543	-0.09042	-0.04404	-0.01646	-0.034	0.02367	0.065054	0.0008	-0.07783	-0.01177	-0.07979	-0.03742	-0.0417	0.043219	-0.11548	-0.00118	-0.00905	0.049829	0.055252	-0.0301	0.122207	0.08911
36.497	0.056872	0.039005	0.015829	0.01721	-0.04325	-0.00791	0.030335	-0.02575	-0.03853	-0.00868	-0.02163	0.020913	-0.03985	0.024494	-0.01774	-0.08401	-0.05051	-0.01085	-0.0445	0.023877	0.063085	0.001414	-0.09297	-0.00022	-0.07669	-0.03642	-0.03687	0.043886	-0.11841	-0.00367	-0.00989	0.045603	0.041369	-0.03114	0.133881	0.079346
36.848	0.059993	0.034053	0.011413	0.012781	-0.05342	-0.00612	0.024573	-0.02139	-0.03749	-0.00419	-0.05332	0.046544	-0.0561	0.017555	-0.01364	-0.08504	-0.06024	-0.00422	-0.05645	0.020007	0.072237	-0.00386	-0.08059	0.030838	-0.06803	-0.03876	-0.0229	0.03887	-0.11258	-0.01242	-0.00117	0.052082	0.047989	-0.02649	0.141308	0.065545
37.199	0.065111	0.037179	0.016758	0.001468	-0.05892	-0.0031	0.026657	-0.0176	-0.02926	-0.02113	-0.07073	0.06108	-0.06904	0.016196	-0.00824	-0.09116	-0.06992	0.006571	-0.04129	0.013228	0.06851	-0.00342	-0.07135	0.038886	-0.05912	-0.03938	-0.01052	0.031339	-0.10265	-0.01342	-0.00388	0.049646	0.059214	-0.0218	0.1555	0.054819
37.55	0.051932	0.039292	0.015562	0.001584	-0.06351	-0.00556	0.018962	-0.00703	-0.02152	-0.02709	-0.06796	0.061694	-0.06605	0.013779	-0.00932	-0.0965	-0.07817	0.008392	-0.03207	0.017604	0.05297	-0.01094	-0.07974	0.04085	-0.06136	-0.0345	-0.00671	0.028242	-0.07134	-0.0137	-0.00097	0.047821	0.070916	-0.00918	0.148337	0.058954
37.901	0.045704	0.044336	0.021009	-0.00811	-0.0529	-0.00802	0.004268	0.001741	-0.01518	-0.01938	-0.07526	0.060108	-0.05428	0.024684	-0.0202	-0.09709	-0.08614	0.011248	-0.02967	0.013936	0.041134	-0.02368	-0.09644	0.026631	-0.05094	-0.02638	-0.00707	0.01755	-0.06286	-0.02105	0.001372	0.046122	0.077432	-0.00189	0.140214	0.067128
38.252	0.038824	0.04858	0.026185	-0.01423	-0.04686	-0.00609	0.000399	0.006839	-0.00667	-0.01202	-0.04248	0.051678	-0.0522	0.025545	-0.01434	-0.09286	-0.08796	0.015051	-0.02441	0.012025	0.034121	-0.02447	-0.10075	0.012603	-0.0411	-0.02842	-0.00776	0.007029	-0.06588	-0.02038	0.003154	0.042083	0.07426	0.012121	0.122859	0.061024
38.603	0.04147	0.040988	0.03623	-0.01424	-0.04299	-0.00344	0.004315	0.008599	-0.00579	-0.01755	0.013224	0.050316	-0.06201	0.012577	-0.01357	-0.08452	-0.08418	0.015121	-0.0148	0.013665	0.016497	-0.03054	-0.1004	0.004336	-0.04121	-0.02977	-0.0109	0.004188	-0.05964	-0.02225	0.003781	0.040628	0.057048	0.021303	0.09358	0.039172
38.954	0.038535	0.0382	0.050076	-0.01161	-0.04495	0.012884	0.000459	0.006594	-0.00348	-0.0186	0.021766	0.050197	-0.05332	0.007611	-0.0057	-0.0831	-0.08887	0.013224	-0.00153	0.010551	0.002697	-0.04121	-0.12114	-0.0001	-0.04572	-0.02888	-0.0202	0.002296	-0.05518	-0.02568	0.001617	0.038441	0.037864	0.017442	0.06611	0.034994
39.305	0.057217	0.034241	0.066398	-0.01461	-0.0395	0.01359	-0.00619	0.002332	-0.00389	-0.02604	0.009209	0.048536	-0.05097	0.015297	-0.00226	-0.0786	-0.09238	0.015067	-0.00546	0.010692	-0.00838	-0.05654	-0.1196	0.017258	-0.03747	-0.02775	-0.02919	0.007041	-0.0523	-0.02599	0.002145	0.032514	0.027517	0.028539	0.051223	0.027225
39.656	0.057252	0.028709	0.071166	-0.01233	-0.03671	0.019007	0.005407	0.000312	0.003838	-0.01814	-0.02469	0.050541	-0.04788	0.024586	-0.00192	-0.07479	-0.09921	0.012089	-0.00926	0.007319	-0.01576	-0.05625	-0.10351	0.020935	-0.04247	-0.02908	-0.03269	0.013961	-0.06297	-0.02646	-0.01024	0.022016	0.017535	0.018201	0.074945	0.041114
40.007	0.048633	0.026845	0.080701	-0.0087	-0.03643	0.024703	0.003745	-0.00391	0.008307	-0.01987	-0.04304	0.038661	-0.04857	0.036264	0.006916	-0.07533	-0.11982	0.014795	-0.02336	0.006636	-0.02377	-0.04287	-0.09288	0.01641	-0.03916	-0.03617	-0.03843	0.022727	-0.06173	-0.0286	-0.01955	0.023499	0.00369	0.011045	0.08702	0.051625
40.358	0.039247	0.021939	0.08224	-0.01289	-0.04164	0.025254	0.003927	-0.0082	0.031157	-0.03223	-0.03487	0.027127	-0.04464	0.049473	0.016757	-0.06394	-0.13095	0.014529	-0.03895	0.009074	-0.02853	-0.05066	-0.09845	0.022169	-0.01463	-0.0339	-0.0468	0.029556	-0.06633	-0.02918	-0.01626	0.016111	-0.0098	-0.00201	0.085529	0.04403
	1 pulse												5 pulses												10 pulses
	ANOVA table		SS	DF	MS	F (DFn, DFd)		P value					ANOVA table		SS	DF	MS	F (DFn, DFd)		P value					ANOVA table		SS	DF	MS	F (DFn, DFd)		P value
	Time x Treatment		0.04333	58	0.000747	F (58, 580) = 0.6381		P=0.9828					Time x Treatment		0.2466	58	0.004251	F (58, 580) = 1.810		P=0.0004					Time x Treatment		0.775	58	0.01336	F (58, 580) = 2.749		P<0.0001
	Time		0.3022	58	0.00521	F (58, 580) = 4.450		P<0.0001					Time		2.319	58	0.03998	F (58, 580) = 17.02		P<0.0001					Time		5.141	58	0.08863	F (58, 580) = 18.23		P<0.0001
	Treatment		0.001798	1	0.001798	F (1, 10) = 0.04316		P=0.8396					Treatment		0.5164	1	0.5164	F (1, 10) = 5.990		P=0.0344					Treatment		2.613	1	2.613	F (1, 10) = 9.513		P=0.0116
	Subject		0.4166	10	0.04166	F (10, 580) = 35.59		P<0.0001					Subject		0.8622	10	0.08622	F (10, 580) = 36.70		P<0.0001					Subject		2.746	10	0.2746	F (10, 580) = 56.50		P<0.0001
	Residual		0.679	580	0.001171								Residual		1.363	580	0.002349								Residual		2.819	580	0.004861
