# Supplementary material for: Adolescent neurostimulation of dopamine circuit reverses genetic deficits in frontal cortex function
Source: eLife. 2023 Oct 13;12:RP87414. doi: 10.7554/eLife.87414 (PMC10575630; doi:10.7554/eLife.87414)
Supplement: Figure 4—source data 1. [file elife-87414-fig4-data1.xlsx]

## Sheet: Sheet1
Figure 4d			Figure 4e			Figure 4 - figure supplement 1a			Figure 4 - figure supplement 1b			Figure 4 - figure supplement 1c
Ctrl	Gq		Ctrl	Gq		Ctrl	Gq		Ctrl	Gq		Ctrl	Gq
58.33	72		12	25		0.047288	0.043415		3.64982	3.95336		0.415324	0.423372
55.56	57.89		18	19		0.051743	0.047004		3.38747	2.90659		0.466314	0.501096
71.43	75.68		28	37		0.041199	0.08074		3.83046	6.04679		0.464977	0.370223
51.35	68.42		37	19		0.042284	0.02902		2.25185	3.25991		0.444314	0.465292
57.69	67.57		26	37		0.074606	0.070055		3.78977	2.12696		0.514999	0.571298
47.62	68.57		21	35		0.035452	0.048496		2.76728	2.63297		0.463564	0.465615
55.26	63.16		38	38		0.054739	0.032341		3.86449	2.54249		0.499799	0.443198
P value	0.0102		P value	0.3987		P value	0.9515		P value	0.9854		P value	0.8793
t	3.043		t	0.8751		t	0.06213		t	0.01863		t	0.1552
df	12		df	12		df	12		df	12		df	12
Figure 4b
Ctrl																			Gq
1	0.715623	0	0	0	0	0.171233	0.72616	0.397639	0.156546	0.275505	0	0	0.153145	0.162608	0.72308	0.455732	0.175449		1	0.41671	0	0.0873921	0.507467	0.235882	0.239357	0	0.090195	0.496155	0.186989	0	0	0	0.00425227	0.131939	0.00901289	0.803979
1	0.486541	0	0	0	0	0	0	0.360067	0.79473	0	0	0	0.104478	0.0243934	0.334251	0.081651	0.639984		1	0.245945	0.0615845	0.29909	0.0698824	0.266943	0.0523118	0	0.293397	0.0812119	0.0499785	0.012815	0.01892	0	0.0280343	0.057786	0	0.362669
1	0.124578	0.216427	0	0	0	0	0.206913	0.00720766	0.166315	0	0	0	0	0.113495	0	0.135634	0.260971		1	0.0910566	0.0939878	0.429477	0.305877	0	0.094908	0	0	0	0	0	0	0	0	0	0.0612619	0
1	0.0976002	0	0	0	0	0	0	0.112827	0.360742	0	0	0	0	0.0924169	0	0	0.887092		1	0.0260531	0.443099	0.363567	0.154687	0.197215	0.394431	0.529073	0.234048	0.207036	0	0	0	0	0	0	0	0
1	0.2815	0.487835	0	0	0	0	0.201592	0.588732	0.499553	0	0	0	0.969488	0.13739	0.158425	0.345669	0.359115		1	0.2022	0.286626	0.0851163	0.182752	0	0.91873	0	0.102136	0.0594291	0.328109	0.0863444	0.591852	0.96176	0.480376	0.385553	0.0618403	0.050731
1	0.11298	0	0	0	0	0.129059	0.0045014	0.0732	0.337026	0	0	0	0	0.00775649	0	0	0.625612		1	0.201554	0.13169	0.219314	0.265677	0.133556	0.190795	0.445582	0.991647	0.391507	0.461995	0.021727	0.117231	0	0	0.116767	0	0.244643
1	0.114529	0.487808	0.0568908	0.0888606	0.897736	0.623648	0.224682	0.14043	0.441175	0	0	0.0817957	0.087795	0.0455574	0.267618	0.21689	0.311428		1	0.00738535	0.086172	0.0870554	0.101809	0	0.0898021	0.307377	0.901616	0.981265	0.136653	0	0	0.189157	0.283736	0	0	0.0427417
1	0.00673365	0	0	0	0	0	0	0	0.021947	0	0	0.372502	0.158452	0.254553	0.177169	0	0.353019		1	0.471612	0.305705	0.155389	0.261805	0.237648	0	0.107409	0.0561254	0.16293	0.377872	0.145535	0.120183	0.113294	0.0466621	0.275552	0.15702	0.879938
1	0.0912599	0.0642514	0	0	0.0710519	0.00997532	0.0110465	0.0170384	0.103236	0.00567383	0.169797	0.166123	0.318784	0.000849484	0.00502647	0.458487	0.0585679		1	0.583322	0.14243	0.195291	0.179983	0	0.103562	0.0109838	0.16085	0.107094	0.212916	0.103842	0.0448885	0	0	0.0219535	0.12826	0.0814693
1	0	0	0	0	0	0	0	0	0	0	0	0	0	0	0	0	0		1	0.200658	0.182073	0.848535	0.0548108	0	0	0	0.560076	0.387702	0.292561	0	0	0	0	0	0	0.848722
1	0.955394	0	0	0	0	0	0.832794	0.0314996	0.17429	0	0	0	0.929663	0.0288871	0	0.0466737	0.566454		1	0.225056	0.208133	0.0438596	0	0	0	0.0261406	0.0391723	0.049008	0.0224623	0.0172248	0.0275596	0	0.00777789	0	0	0.141662
1	0.0844744	0.353876	0	0	0	0	0.170219	0.195113	0.0890709	0.545269	0	0.210805	0	0.00727196	0	0.0539655	0.168969		1	0.45277	0.706282	0.457718	0.464169	0.316977	0.280307	0.125237	0.31032	0.174056	0.392591	0	0.0560129	0	0.0975837	0.549196	0.304088	0.238087
1	0.00835023	0.450491	0.037186	0	0	0	0.0039844	0.0466325	0.783611	0	0	0	0.0605798	0.00861802	0	0.0374506	0.412489		1	0.794849	0.227381	0	0	0.351671	0.410283	0.205141	0	0.0796303	0.053981	0	0	0	0	0.0452129	0	0.0565186
1	0.141443	0.320584	0.0529037	0	0	0.111798	0.317632	0.371159	0.600233	0.625707	0.0194577	0.340927	0.112964	0.476771	0.468907	0.873712	0.777524		1	0	0	0	0	0	0	0	0.639047	0.883133	0	0	0	0.722116	0.722116	0.288846	0.46745	0.511134
1	0.179959	0.38518	0.213269	0	0.0534315	0.0754327	0.0858108	0.118143	0.319477	0.262008	0.473971	0.185989	0	0.042768	0.79514	0	0.748158		1	0.18869	0	0	0	0	0	0	0	0.925271	0	0	0	0.438405	0.162108	0	0	0.0784991
1	0.255046	0.226711	0.143945	0	0	0.0298142	0.070994	0.580054	0.346158	0.0188947	0.0394219	0.0158932	0	0.109904	0.111758	0.00553716	0.33497		1	0.624727	0.364059	0.292682	0.260941	0	0	0	0.178039	0.166391	0	0	0	0	0	0	0	0.82575
1	0.525475	0.336447	0.112648	0	0.0174636	0.0184909	0.0614718	0.0906517	0.419742	0.136225	0.0645317	0.0543001	0	0	0.231273	0	0.00770439		1	0.202203	0.0898449	0	0.0140472	0	0	0	0.57972	0.135422	0	0	0	0.104348	0.46146	0.105125	0.113944	0.0448738
1	0.396065	0.247065	0	0.238959	0.137314	0.23424	0.0550726	0.425168	0.261621	0.679835	0.143793	0.387447	0.0334329	0.0397459	0.0328561	0.038765	0		1	0.777012	0.331398	0.333989	0.321989	0.329897	0.0164443	0.0646454	0.169071	0.227287	0.236956	0.117923	0.172662	0.281019	0.254941	0.469592	0.00308971	0.759859
1	0.157001	0.0357101	0.0918837	0	0	0	0.0187171	0.00855371	0.07768	0.589907	0.716888	0.987612	0.696907	0.252926	0.479373	0.0878643	0.580125		1	0	0	0.102397	0	0	0.291584	0.627813	0.0928256	0.546435	0	0	0	0	0	0	0	0.0698411
1	0.0665298	0.232454	0.146389	0	0.0856702	0.0250851	0.103382	0.246277	0.282749	0.135933	0.467312	0.367413	0.0327825	0.0362138	0.0330676	0.0856129	0.108672		1	0.0497307	0.400493	0.076658	0.116934	0	0	0	0.11616	0.232732	0.0789738	0	0	0	0	0	0	0.406026
1	0.561792	0.2461	0.624539	0.403178	0	0.490626	0.179801	0.0923419	0	0.016043	0	0.0119361	0.346147	0.950699	0.385533	0.236579	0.0046953		1	0.571433	0	0.503458	0.0664428	0	0.0923062	0.793204	0.470349	0.382504	0.505083	0.0248371	0	0	0.482671	0	0.984682	0.993203
1	0.311605	0.815198	0.932962	0.984827	0.128642	0.0560044	0.162348	0.236536	0.0119342	0.0131761	0	0.0125193	0.319907	0.100916	0.061374	0.4949	0.666212		1	0.390315	0.17454	0.036266	0.00480605	0.0104835	0	0.0369186	0.161496	0.0650645	0.110911	0.253527	0.57838	0.0567154	0.217013	0.116083	0.370454	0.472857
1	0.0697674	0	0	0	0	0	0	0	0	0.0394133	0.121822	0.0606131	0	0	0.495563	0	0		1	0.298947	0.409058	0.464183	0.68844	0.404828	0.393351	0.989758	0.970048	0.279701	0.480617	0.221752	0.213223	0.285886	0.0598975	0.130011	0.246871	0.255104
1	0.156755	0.0209005	0	0	0.188993	0.989252	0.90514	0.441477	0.0204272	0	0	0	0	0.0330885	0.000949781	0	0		1	0.298041	0	0.157138	0.28289	0.12127	0.657781	0.539969	0.714849	0.750349	0.0428918	0.109332	0.160799	0.122919	0.134753	0.0365346	0.130891	0.711237
1	0.0616964	0.189332	0.475089	0.0226099	0.0984257	0.0720502	0.322576	0.291022	0.42253	0.506186	0.714582	0.461568	0.43982	0.179232	0.0303008	0.135726	0.884075		1	0	0.949119	0.576452	0.0558312	0.208546	0.131059	0.0179952	0.246342	0.361511	0.451173	0.399655	0.391351	0.334323	0.716811	0.545534	0.57713	0.539777
1	0.604167	0	0.108435	0.0241117	0.909357	0	0	0.32323	0.16001	0	0	0.0682779	0	0.0277989	0.0448845	0	0.0508497		1	0.541207	0.400159	0.316736	0.182194	0.123627	0.388758	0.0749886	0.118286	0.227316	0.112089	0.226219	0.171269	0.227128	0.0979831	0.120806	0.158289	0.503351
1	0.927863	0	0	0	0	0	0.023647	0.387402	0.400644	0	0.192972	0	0	0.959005	0.947441	0	0.259777		1	0.147443	0.449541	0.112206	0.0956086	0.0102406	0.0445516	0.114739	0.0248663	0.0323249	0.0650259	0.0689677	0.123539	0.00843529	0.00910494	0.0771572	0.215835	0.871966
1	0.870059	0.711497	0.955635	0.140599	0	0	0.109757	0.150064	0.195503	0.0910302	0	0	0	0.00580473	0.0175751	0	0.0588322		1	0.151861	0.013276	0.140638	0.0888082	0	0	0.185407	0.330992	0.227531	0	0	0	0.269841	0.174215	0	0.500123	0.478402
1	0	0.0451765	0	0	0.253267	0.211884	0.16579	0.0729809	0.0592402	0.00498802	0.19072	0.371506	0.111452	0	0.00175492	0	0.435995		1	0.138536	0.135109	0	0	0	0	0.21969	0.596563	0.0500743	0	0	0	0	0	0	0	0.0752405
1	0.0651342	0.034524	0.173327	0.415314	0	0.816789	0.992043	0.542629	0.662018	0.257076	0.0556371	0.862401	0.859375	0.104914	0.21987	0	0		1	0.230583	0.118989	0.0091571	0.141183	0.171081	0.074016	0.0408042	0.021126	0.00649832	0	0	0.0818263	0.156722	0.166351	0.416406	0.904255	0.65039
1	0.508816	0.272277	0.437334	0	0.46297	0.646733	0.160829	0.293762	0.0781699	0.0259643	0	0.00862491	0.100023	0.0216933	0.000313243	0	0.083504		1	0.0206425	0.160492	0.0161056	0.0151717	0.194329	0.661019	0.634084	0.133371	0.4516	0.167088	0.42894	0.531	0	0	0	0.0154484	0.999068
1	0.282613	0.207249	0.249671	0	0	0.211042	0.0767757	0.164158	0.08603	0.0330267	0.11365	0.25056	0.0565622	0.0821708	0.0606798	0.161899	0.122094		1	0.214311	0.374406	0.202314	0.0543131	0.0487538	0.0593174	0.0171773	0.0468606	0.0567806	0.27	0.0156774	0.0800755	0.0979209	0.0167864	0.239629	0.357379	0.0230518
1	0.256124	0	0	0	0	0	0.0441164	0.111786	0.570564	0.0187508	0	0	0	0	0	0	0.499953		1	0	0.00362253	0.0715751	0	0	0	0.0646153	0.199091	0.763461	0.101166	0.118455	0.166887	0	0.188797	0.10554	0.107213	0.279041
1	0.48904	0.0971858	0.583788	0	0.240713	0.392438	0.0638119	0.630413	0.242831	0.203648	0.0700003	0.456671	0	0.127819	0.0631358	0.193744	0.30257		1	0.294526	0.686343	0.245796	0.154916	0.0457013	0.038614	0	0.0209007	0	0	0.131745	0	0.241	0.572084	0.439801	0	0.508188
1	0.635006	0.347567	0.0278344	0.0834416	0.0150411	0.606262	0.686853	0.731232	0.713349	0.323426	0.33796	0.264933	0	0.164512	0.0638321	0.0514042	0.0310857		1	0.155477	0	0.163174	0	0.0286726	0	0.190495	0.0478519	0.251394	0.0476371	0	0	0.0456547	0	0	0.348316	0.121394
1	0.564284	0.26976	0.085464	0.311827	0.0303489	0.0642683	0.211555	0.37031	0.422977	0.418305	0.68146	0.0785402	0.271541	0.00124407	0.604008	0	0.0113164		1	0.107492	0.00749403	0	0	0	0.00810723	0	0.0518921	0.134243	0.0954498	0.0651091	0.201375	0.274602	0.0742958	0	0.0959061	0.265891
1	0.289543	0.418231	0.0550031	0.115602	0.0935663	0.0715244	0.0772292	0.14141	0.600874	0.00228726	0.0469025	0.0181667	0	0.0486246	0.413917	0.0613009	0.170942		1	0.0486034	0.0680425	0	0	0	0	0.135715	0.31883	0.0899024	0	0	0	0	0	0	0.53677	0.426562
1	0.840816	0	0	0.396419	0	0.198318	0.812014	0.0425906	0	0.778161	0.113327	0.134954	0	0.0349314	0.644195	0	0.560876		1	0.258656	0.456073	0.105349	0.211185	0.265077	0.53951	0.0782723	0.0229514	0.474863	0.446016	0.533361	0.306848	0.319816	0.190898	0.397455	0.196852	0.924129
1	0.137997	0	0.208886	0.635099	0	0	0.497732	0.0898468	0	0	0	0.0277136	0	0.0346682	0.139883	0	0		1	0.299702	0.0129705	0.307319	0.156019	0.0133089	0.47592	0.245045	0.618876	0.689766	0.0369325	0.243368	0.20324	0.0999437	0.0550656	0	0.0845311	0.615204
1	0.026321	0.438851	0.0867814	0.0718512	0	0	0.0360116	0	0.353164	0.651307	0.165598	0.0466362	0	0.121909	0.22131	0.278833	0.618318		1	0.584228	0.378366	0.355795	0.240881	0.116782	0.325098	0.284042	0.22105	0.668447	0.0132616	0.131546	0.162254	0.160884	0.17999	0.144046	0.139818	0.355169
1	0.225567	0.317233	0.0337865	0.119348	0.0271245	0	0.257379	0.238977	0.266637	0.423473	0.190359	0.19343	0	0.000181742	0.121615	0.179561	0.1087		1	0.0695618	0.16458	0.0373974	0.0747507	0.0394605	0	0	0.137931	0.244155	0	0.00264327	0.189171	0.100094	0.0588999	0.0456304	0.00939033	0.145922
1	0.0542309	0.184991	0.253913	0.0769941	0	0	0.000908262	0.111522	0.0986576	0.0681059	0.18488	0.0680407	0.16065	0.679347	0.15402	0.216047	0.0428239		1	0.0468214	0.206847	0.723471	0.793364	0.141716	0.318228	0.159046	0.0978061	0.533673	0.460412	0.596866	0.434998	0.366444	0.147158	0.904849	0.118606	0.860365
1	0.457985	0.209582	0.0499864	0.0486347	0	0	0.4421	0.127377	0.48321	0.0257833	0.169038	0	0.0507873	0.0933322	0.137633	0	0.0541383		1	0.399506	0	0.13378	0.0328346	0	0	0	0.767523	0.145864	0	0	0	0.0193097	0	0.113693	0.0937059	0.251154
1	0.537487	0.438947	0	0	0	0	0	0.393132	0.112856	0.0671774	0.800944	0.176297	0.0539691	0	0.0922442	0	0		1	0	0.19119	0	0	0	0	0	0	0.0534336	0.918975	0	0	0.931609	0	0.256066	0.145424	0.37334
1	0.649394	0.337242	0	0	0	0.097868	0.0299921	0	0.115641	0.3959	0	0.450623	0.636029	0.0962146	0.0144613	0.0807016	0.115427		1	0	0.418358	0.0681885	0	0	0.0835787	0.0436063	0.404957	0.605307	0.378686	0	0	0	0.0808798	0	0.365972	0.983573
1	0.282249	0.143355	0.07352	0	0	0.0453673	0.0381149	0.444128	0.0735119	0.15697	0.183022	0.127153	0	0	0.0219146	0	0.00773414		1	0.512736	0	0.0249737	0	0.0304274	0.374737	0.0702632	0	0.0434631	0	0.362818	0.593703	0	0.0170226	0	0	0.3964
1	0	0	0	0	0	0	0.00938749	0	0	0.0333783	0.221899	0.171467	0	0	0.056869	0	0.0865514		1	0	0	0	0	0	0	0	0	0	0	0.160425	0	0.0255865	0	0	0.630077	0.56075
1	0.868877	0.046518	0.301451	0	0	0	0.0309663	0.183852	0.0207394	0	0	0.0151467	0	0.477884	0	0	0.0339215		1	0.0473066	0.0366897	0	0.145802	0	0	0	0	0	0	0.0906444	0.224402	0.302185	0.420069	0.514946	0.584187	0.26142
1	0.35368	0	0.216811	0	0	0	0.104266	0.489446	0.490275	0	0	0.0786196	0	0.00725993	0.0031296	0	0		1	0.103468	0	0.0426756	0.495427	0.521776	0	0.173606	0.0526492	0.247444	0.122938	0.0552539	0.697961	0.774335	0.762035	0.925042	0.936504	0.917865
1	0.228919	0.141907	0	0	0.0625409	0	0	0.0532503	0	0.338433	0.671722	0.213445	0.0271144	0	0.280027	0.197378	0.559309		1	0.799235	0.466012	0.320484	0.247873	0.159511	0.367501	0.273871	0.471999	0.135168	0	0.0638108	0.13142	0.0746673	0.27099	0.158223	0.198933	0.215396
1	0.518633	0.418003	0.518258	0.408614	0.168974	0.141982	0.357605	0.33881	0.329092	0.543467	0.970239	0.566201	0.246503	0.133834	0.0654565	0	0.0688419		1	0	0	0	0.240511	0	0	0	0	0	0	0	0	0	0.502005	0.753008	0.724054	0.38667
1	0.0123508	0.0597121	0	0	0	0	0	0.0598367	0.152631	0.169175	0.439989	0.175727	0.064867	0.0330736	0.0555763	0	0.316676		1	0.0647107	0.0405783	0.486939	0.473779	0.473779	0.570971	0.566134	0.408208	0.244925	0.173932	0.0908516	0.214732	0.128253	0	0	0.0905544	0.324539
1	0.774482	0.310195	0.193169	0.111294	0.339574	0.144603	0	0.0415225	0	0.155143	0.321765	0.303338	0.319946	0.219376	0	0.0393308	0.0653183		1	0.0992279	0.0782173	0.756101	0.735665	0.774106	0.147133	0.288332	0.0156072	0.900176	0.706351	0.82659	0.582702	0.717933	0.0828295	0.170587	0.576887	0.702026
1	0.741756	0.541231	0.0535838	0.00751986	0.0221886	0.21295	0.136372	0.164292	0.497694	0.291404	0.757651	0.295891	0.659359	0.274009	0	0.13148	0.642742		1	0.181122	0	0	0	0	0.230174	0	0	0	0	0	0	0.424789	0.517364	0.42489	0.11714	0.965424
1	0.0528916	0.419362	0.22289	0	0.0206611	0.548918	0.539945	0.849163	0.449168	0.236819	0.0382275	0.0465222	0.0347278	0.219171	0.0413597	0.0754207	0		1	0.10529	0	0	0.263199	0	0	0	0	0	0	0	0	0	0	0	0.246568	0.980539
1	0.566588	0.356047	0.222197	0	0	0	0	0.0652892	0.593191	0.633043	0.200652	0.0292046	0.129309	0.0316089	0	0	0.345146		1	0.777099	0.832345	0.331108	0.08006	0.0999102	0	0	0	0	0.31772	0.656291	0.261568	0.035084	0.0932279	0	0.433894	0.305337
1	0.738476	0	0.432199	0.823453	0.662806	0.662806	0.175846	0.287391	0.320892	0.298985	0.0492199	0.761579	0.535141	0.585422	0.480053	0.239371	0.0564408		1	0	0	0	0	0.262622	0	0	0	0	0	0	0	0.583246	0	0.817097	0	0.0774637
1	0.0116487	0.136068	0.0329003	0.361336	0.272272	0	0	0.0251862	0.115622	0.030285	0	0	0	0.0134861	0.361597	0.29241	0.747827		1	0.75536	0.489253	0.0493337	0.218806	0.330552	0.488298	0.575306	0	0.0861469	0	0	0.698349	0.650548	0.349188	0.273726	0.460759	0.311719
1	0.541111	0.270257	0.185065	0.159386	0.598153	0.0188761	0	0.0203926	0.0770091	0.33768	0.829829	0.912556	0.17093	0.0421802	0.0137086	0	0		1	0	0	0	0	0	0	0	0	0	0	0	0	0	0	0	0	0.955523
1	0.537071	0.0561888	0	0	0	0	0	0	0	0.131381	0	0	0	0.215937	0	0	0.42808		1	0.0587834	0	0	0	0.1096	0	0	0	0	0	0	0	0	0	0	0	0.0495329
1	0.920717	0.158743	0.473606	0.619277	0.1293	0.203966	0.443082	0.748728	0.23105	0.77726	0.907439	0.890936	0.603792	0.197064	0.18307	0.321199	0.531008		1	0.0163278	0	0	0	0	0.715924	0.859109	0	0	0	0.0952582	0.276835	0.180113	0	0	0	0.045368
1	0.847479	0.370307	0.371971	0.298138	0.359447	0.778572	0	0.456059	0	0	0	0	0	0.413265	0	0	0		1	0.19588	0	0	0.130611	0.287521	0.0685007	0	0.134894	0.16387	0	0.831022	0.895803	0.0726762	0	0.460256	0.231557	0.644014
1	0.0549966	0.511453	0.483348	0.21076	0.688082	0.635206	0.67033	0.798843	0.0424107	0.044583	0	0	0	0	0	0	0		1	0.242674	0	0	0	0	0	0	0	0	0	0	0	0	0	0	0	0.0269381
1	0.277068	0	0	0	0	0	0	0	0.815711	0	0	0	0	0	0	0	0		1	0	0	0	0	0	0	0	0	0	0	0	0	0	0	0	0	0.335609
1	0.080786	0	0	0	0.0221477	0.0131246	0.0428516	0.104001	0.139255	0.0546217	0.0889484	0	0.06216	0	0.0567694	0.543537	0.266584		1	0.0211027	0	0	0.109809	0	0	0	0	0	0	0.171411	0	0	0.0385258	0.0762812	0.211273	0.354041
1	0.616235	0.669363	0	0	0	0	0	0.465403	0.569383	0.522369	0	0	0	0	0	0	0.0662332		1	0.242783	0.334146	0.273771	0.55303	0.43711	0.143985	0.0888154	0.185862	0.43257	0	0.0246782	0.174991	0.0967197	0.172045	0.0492327	0.181581	0.400479
1	0.153462	0	0.415937	0.519922	0.529649	0.0794325	0	0.0197672	0.0938625	0	0.996036	0.297169	0	0.255576	0.710721	0.357508	0.349496		1	0.534464	0.478521	0.156865	0.27571	0.480215	0.0439003	0	0.212677	0.153127	0	0.181936	0.190988	0	0	0.221424	0.400311	0.404145
1	0.142779	0.0560342	0.158245	0.0170966	0.162256	0.0833461	0.0738575	0	0.0431154	0.0543452	0.0068948	0	0	0.0329118	0.0389878	0	0.530516		1	0.521794	0.640025	0.0374239	0	0	0.0718394	0.143444	0.192173	0.28157	0	0.0730304	0	0.0935052	0.0841302	0.258821	0.29839	0.392235
1	0.0529523	0.65743	0.19365	0.102734	0.78737	0.127631	0.222838	0.279288	0.748728	0.833378	0.0770183	0.135376	0.506517	0	0.485364	0.157948	0.929366		1	0.23718	0	0.16699	0.752966	0.74144	0.799825	0.985372	0.408696	0.204348	0.265466	0.161966	0.0779627	0.205021	0.142326	0.0558141	0.0408038	0.274635
1	0.032527	0.290985	0.337773	0	0.371685	0.116035	0.192977	0.815728	0.324067	0.0984426	0.0312463	0	0	0	0	0	0.281666		1	0.104423	0.237891	0	0	0	0	0.0223607	0.143141	0.105164	0.439828	0.219914	0	0	0	0.426911	0.381993	0.315478
1	0	0	0	0.0617385	0	0	0	0.165079	0.869325	0.41571	0.238498	0.0313682	0.0327719	0.502528	0.552781	0.632546	0.127714		1	0.177943	0	0	0	0.0742449	0.0370926	0	0.0907314	0	0	0	0	0.0437143	0	0.756248	0.101121	0.384613
1	0.261195	0.205371	0.0636265	0.166911	0.0991508	0.0721784	0	0.893244	0.557576	0.16179	0.199985	0.0635134	0.0175877	0.0299466	0	0	0.00261819		1	0.591251	0.419903	0.0393959	0	0.0979933	0.122312	0	0	0	0	0	0	0	0	0.234269	0.285163	0.427133
1	0.218173	0.044049	0.0197142	0	0.284494	0.269742	0.053234	0.143739	0.078367	0	0.216803	0.525683	0	0	0	0	0.649496		1	0.206302	0.06682	0.0864422	0.0345916	0	0	0.0248716	0.0177011	0.0148689	0	0.0859621	0.358662	0.0764333	0.0153696	0.101025	0	0.0562767
1	0	0.0222942	0.108599	0.0767927	0.151354	0.203312	0.00766246	0.694947	0.357491	0.22731	0.110241	0.683999	0	0.110682	0.827468	0.236637	0.796981		1	0.351747	0.285415	0	0.151608	0.185676	0.110058	0.193533	0.0515845	0.155343	0.0206616	0	0.0348637	0.209182	0.445354	0.265782	0.0863437	0.164787
1	0.101209	0.245839	0	0	0	0	0	0.403252	0.0296174	0	0.258864	0.0810416	0.407664	0	0.553449	0.836509	0.776368		1	0.707932	0.0100814	0.337224	0	0.14742	0.960879	0.277912	0.354885	0.0444649	0.0898144	0.881367	0	0.373552	0	0.873093	0.379035	0.7395
1	0	0	0	0	0	0	0	0	0	0	0.0418189	0	0	0	0	0	0.173637		1	0.0865986	0	0.301862	0.996145	0	0	0	0.482214	0.17715	0.550974	0.330585	0	0	0.441183	0.302526	0	0.415103
1	0	0	0	0	0	0	0	0.028142	0	0	0	0	0	0	0.144088	0.689579	0.415739		1	0.307849	0.101473	0.116109	0	0	0	0	0.578942	0.251459	0.442382	0	0	0.0845076	0.326507	0.392634	0.0986828	0.269679
1	0.20797	0	0.11662	0	0	0	0	0.105651	0.454298	0.130875	0.0152184	0	0.32751	0	0	0	0.498026		1	0.284124	0.0964664	0.0774923	0	0	0.236853	0.0089499	0.686518	0.199455	0.124638	0.0154286	0	0	0.0702397	0	0.230537	0.757697
1	0.227061	0.00780868	0	0	0	0	0.00393748	0.0448189	0.177125	0.148911	0	0	0.139848	0.225455	0.271492	0.134396	0.107972		0.171142	1	0.17082	0.0422779	0	0	0	0	0.575801	0.203423	0.879353	0	0.0497037	0	0	0	0	0.694016
1	0.110295	0	0	0	0	0	0.694951	0.752999	0.219099	0	0	0	0	0	0	0	0.000479742		0.660174	1	0.417316	0	0	0	0	0	0.304378	0.546806	0.15849	0.24654	0.0221624	0	0	0.0368269	0	0.0689973
1	0.306072	0	0	0	0	0	0	0.12273	0.457646	0	0.0861724	0	0.42088	0.118813	0	0	0.0223594		0.561497	1	0.902045	0.0820122	0.387881	0	0.14034	0	0.00894242	0.322833	0.489694	0	0	0	0	0.307945	0.246635	0.0406138
1	0.458401	0.70496	0.560156	0.850867	0.120987	0.561482	0.725607	0.64039	0.0855345	0.0859107	0.0444614	0.0209401	0	0.198599	0.0210637	0.324576	0.530799		0.854968	1	0.716364	0	0	0.244012	0.162727	0	0.411302	0.322147	0.254847	0.251149	0.0138709	0	0	0	0	0.121993
1	0.158345	0.0821687	0	0	0	0	0.552111	0.0858305	0.42144	0	0.0433922	0	0	0	0	0	0.0902386		0.265701	1	0.342857	0.0527998	0.389906	0	0	0	0.264701	0	0.172265	0	0	0	0	0	0	0.495935
1	0.017911	0	0	0	0	0	0	0.0858561	0.300352	0.00976167	0	0	0.0536792	0	0	0	0.0209761		0.615785	1	0	0.273975	0	0	0	0	0.473513	0.772971	0	0	0	0	0.135478	0	0	0.0917233
1	0.25225	0.021026	0	0.364101	0	0	0.0929608	0.301532	0.393362	0.289619	0.743512	0.395285	0.19588	0.123964	0	0	0.35404		0.139475	1	0.437943	0.188124	0.318438	0	0	0	0.210037	0.474376	0	0	0	0	0	0	0	0.0635459
1	0	0	0	0	0	0	0.511906	0.660396	0	0	0	0.510939	0	0	0	0	0.0457036		0.504468	1	0.916753	0.512082	0.386443	0.362969	0.254069	0.596437	0.503969	0.238012	0.284491	0.305948	0.17915	0.535539	0.474451	0.436708	0.239938	0.473893
1	0.279497	0.587362	0.414576	0.538766	0.249676	0.228762	0.194317	0.229287	0.0583585	0.386976	0.354845	0.406716	0.546247	0.614018	0.63767	0.138073	0.026128		0.892732	1	0	0	0.117174	0	0	0	0	0	0.0726334	0	0	0	0.115526	0.367551	0.164372	0.723221
1	0.214389	0.0953083	0.039918	0.0501826	0.00752739	0	0.00959436	0.0719911	0.0205376	0.16464	0.15597	0.13864	0.0914569	0.161573	0.215431	0.0188594	0.0150615		0.315631	1	0.754345	0.443676	0.223313	0.438241	0.511658	0.377976	0.241727	0.091781	0.206796	0.245069	0.24045	0.561764	0.574697	0.474622	0.432576	0.560969
1	0	0.0760931	0.0345537	0.108597	0.53209	0.292802	0.636508	0.232347	0.502541	0	0	0.094944	0	0.158405	0.400174	0.338626	0.694083		0.28605	1	0.584168	0.667357	0.482517	0	0	0	0.0482022	0	0.0919625	0.0643737	0	0	0	0	0	0.473219
1	0	0	0	0	0	0	0	0.0817562	0	0	0	0	0	0	0.454334	0.0568273	0.0436634		0.384387	1	0.280658	0.424933	0.39423	0.159683	0.197661	0.951657	0	0.0227716	0.0917086	0.38494	0	0	0.215251	0.447139	0.136908	0.321154
1	0.464366	0.274904	0.236534	0.503407	0.230502	0.0263309	0.106749	0.342017	0.363517	0.297256	0.963256	0	0	0	0.0269121	0.752561	0.0459097		0.304509	1	0.111356	0.00204146	0	0	0.966634	0	0.335559	0.0207503	0.0714796	0.279396	0	0.128441	0.923787	0	0	0.878925
1	0	0.0646101	0	0	0	0.124093	0.952399	0.907023	0.883255	0	0	0	0	0	0	0.00421685	0.272727		0.806283	1	0.211921	0.480228	0.0716327	0.13229	0.236815	0.194556	0.474334	0.708387	0.227182	0.0444897	0	0	0.182745	0.112955	0.317496	0.940757
1	0.0469136	0	0	0	0	0	0.125359	0.0310518	0.389863	0.142208	0	0.653051	0	0.293443	0	0.0274361	0.105312		0.110442	1	0	0.0654877	0	0	0	0	0.338218	0.593051	0.12991	0	0.960069	0.685764	0	0.697859	0.418704	0
1	0	0	0	0	0	0	0.842604	0.502599	0.893619	0	0	0	0	0	0	0.200988	0		0.176956	1	0	0.105244	0.37194	0.043659	0.0804345	0	0.0776261	0.0327067	0	0	0.0334958	0.121803	0.31521	0	0.0273465	0.113538
1	0.204419	0.233001	0	0	0.645951	0.54874	0.046164	0.0897469	0.035196	0	0.0438973	0.341423	0.32923	0.215036	0.353997	0.0200157	0.0251936		0.91674	1	0	0.172644	0	0	0.280075	0.174562	0.260976	0.756685	0.0522228	0	0	0	0	0	0	0.619815
1	0.858295	0.536065	0.498357	0.564387	0.251112	0.771263	0.338384	0.216423	0.114828	0	0	0	0	0.228509	0.074307	0.0134255	0.0855957		0.799589	1	0.791957	0.868702	0.409568	0.26532	0.218739	0.330501	0.19635	0.887719	0.686934	0.362937	0.233697	0.260087	0.291004	0.38162	0.419585	0.520265
1	0.333152	0.622435	0	0.0895225	0	0.049827	0.0630641	0.324817	0.0471714	0.132049	0	0	0	0	0	0.00320836	0.0479939		0.329576	1	0.0543331	0.236948	0.0943986	0.345275	0	0	0.151714	0	0.040211	0	0	0	0.226477	0	0	0.738659
1	0	0.522721	0.244438	0	0	0.330069	0.407837	0.283635	0.0474688	0	0	0	0	0	0	0.0392276	0.101331		0.288495	1	0	0.707245	0.30782	0	0.103471	0.237225	0.559769	0.300834	0.691689	0.502131	0	0.211959	0	0.102027	0.0971688	0.508027
1	0.296356	0.180788	0.186237	0.200579	0	0.126348	0.136075	0.520214	0.628846	0	0	0	0	0	0	0.0713637	0.714978		0.437373	1	0.304629	0.315364	0.108248	0.410375	0.108278	0.0386377	0.238294	0.122048	0.0198165	0	0	0	0.0835009	0.124325	0.433996	0.581361
1	0.297469	0.110655	0	0	0	0	0.0602715	0.922051	0.546815	0	0	0.0744305	0.363943	0.121725	0.327325	0.029787	0.119164		0.263649	1	0.647955	0.403726	0.335846	0.188136	0.00472816	0.190592	0.987978	0.304513	0.0788091	0.613207	0.445796	0.253848	0.379727	0.0215992	0.181834	0.250678
1	0.642303	0.616816	0.644854	0.430122	0.867888	0.859487	0.421329	0.350659	0.344471	0.283888	0.0777496	0.0359014	0.047017	0.150595	0.150191	0.109822	0.155531		0.45577	1	0.790024	0.675575	0.385138	0.489326	0.307718	0.18738	0.217116	0.159488	0.209223	0.384305	0.783057	0.838375	0.525698	0.384431	0.119476	0.0512506
1	0.0965542	0	0	0	0	0.200712	0.247774	0	0.038192	0.188816	0.00781652	0.0211069	0.0888495	0.112343	0	0.0218093	0.369716		0.655632	1	0.925965	0.70103	0.245575	0.295513	0.300061	0.170185	0.199198	0.117515	0.183062	0.167222	0.0381889	0.0520029	0.0840502	0.0699505	0.0727027	0.357572
1	0.762833	0	0	0	0.42695	0.480568	0.489515	0.852961	0.423597	0.129413	0.0234854	0.0097156	0.0387044	0.309651	0.897621	0.635135	0.710556		0.479599	1	0.767827	0.63761	0.339488	0.244451	0.135753	0.337214	0.267544	0.241967	0.0987224	0	0.00354443	0.0245875	0.344344	0.408599	0.308997	0.1898
1	0.132596	0	0	0	0	0.793372	0.335415	0	0.457045	0	0.39317	0.758257	0	0.258638	0	0.0332654	0.563926		0.265137	1	0	0.267473	0	0	0.114106	0.145029	0.865243	0.372597	0	0	0.198666	0	0	0	0.225618	0
1	0.590661	0.0767524	0.36292	0.352246	0.219439	0.165136	0.246286	0.629567	0.805955	0.535502	0.237013	0.473169	0.16636	0.0909751	0.00663832	0.0657555	0.0397875		0.292346	1	0.149066	0.236458	0.140476	0	0.49059	0.0382828	0.165184	0.0671325	0	0	0	0	0.122695	0	0.319948	0.117708
1	0.205187	0	0.188431	0.479655	0.63954	0.510522	0	0.0398592	0.332481	0.393945	0.507102	0.147282	0.142735	0.10396	0.267035	0.257171	0.562488		0.232389	1	0.564706	0	0	0.268555	0.0417752	0.388536	0.0240403	0	0	0	0	0.0243023	0	0	0	0.0124304
1	0	0	0	0	0	0.962949	0.459995	0.709177	0.73156	0.848832	0.45587	0.00593397	0.229268	0	0	0.0859857	0.0997231		0.632918	1	0.492822	0.434976	0.266686	0.249721	0.26329	0.470115	0.683221	0.586381	0.0777152	0.103232	0.269395	0.269848	0.252974	0.146241	0.171745	0.767381
1	0	0	0	0	0.22418	0.529315	0.501456	0.555946	0.101147	0.381145	0.15295	0.217103	0.022934	0.0490979	0.135986	0	0.538814		0.721485	1	0	0	0	0	0	0	0.230899	0.224038	0	0	0	0.0544205	0	0.213613	0.133061	0.260454
1	0.402374	0	0.901039	0.613957	0.573198	0.593746	0.525381	0.225568	0.421906	0.152215	0.444548	0.417024	0.202019	0.0840419	0.097954	0.236732	0.476744		0.289626	1	0.921824	0.97527	0.508267	0.180881	0.167585	0.144631	0.8069	0.811576	0.526086	0.196699	0.452948	0.641877	0.424248	0.293503	0.387861	0.388854
0.356143	1	0.107776	0.07465	0.104752	0	0.010188	0.950145	0.233565	0.136425	0.0168304	0	0.0462866	0.0371481	0.0606189	0.0468561	0.0276604	0.680448		0.4746	1	0.579837	0.638072	0.59764	0.238586	0.314308	0.410184	0.094768	0.347624	0.503292	0.176937	0.257901	0.293863	0.281077	0.640172	0.513238	0.287072
0.225796	1	0.51228	0.0787904	0.141886	0.405988	0.49549	0.834565	0.428331	0.349223	0.357254	0.319994	0.0266661	0.0911675	0.758306	0.0649278	0.0207468	0.193005		0.0405457	1	0.0692405	0.121072	0.457507	0.588023	0.141827	0.278327	0.179562	0.11037	0.477281	0.668194	0.190912	0	0.0683833	0.257284	0.13559	0.106938
0.559438	1	0.387758	0.116996	0.0118401	0.257081	0.329021	0.318547	0.368046	0.260108	0.113186	0.199276	0	0.0578154	0.659059	0.269995	0.081803	0.365206		0.421468	1	0	0	0	0	0	0	0.542903	0.31723	0	0	0	0	0	0	0	0
0	1	0	0	0	0	0	0	0	0.820045	0	0	0	0	0	0	0	0		0.16382	1	0.281084	0.0932875	0.327677	0.163438	0.10604	0.127661	0.469483	0.50209	0.627959	0.115615	0.0165164	0.0742065	0.00466489	0.151695	0.133841	0.117414
0.551454	1	0.860746	0.322747	0.0475136	0.131045	0.0849827	0.00118924	0.0129755	0.0920796	0	0	0	0.266431	0.0626074	0.00774141	0.877921	0.780671		0.2421	1	0.81878	0.142268	0.626562	0	0.0422586	0.677471	0.927744	0.774224	0.179087	0.329564	0.109855	0.402975	0.791534	0.376795	0.0511951	0.223996
0.476266	1	0	0.460845	0	0	0.0718911	0.044736	0.0875318	0.00482298	0.379432	0.180834	0	0.0936872	0.00955525	0	0	0.533869		0.794765	1	0.113206	0	0	0	0	0.170372	0.315257	0.157013	0	0	0	0	0.249183	0.443632	0.643937	0.907454
0.463378	1	0.540594	0	0	0.3865	0	0.602538	0.391591	0.656273	0.208159	0.259426	0.0951228	0.0719366	0.767123	0.117487	0.101236	0.891281		0.529838	1	0.466818	0.327477	0.31945	0.106962	0.0192757	0.0762973	0.10885	0.412637	0.296596	0.0851859	0	0.0783813	0	0	0.058865	0.252682
0.744529	1	0.102643	0	0	0	0	0.153699	0.285947	0.93123	0	0.238202	0	0.0589737	0.470767	0.517904	0	0.242245		0.290385	1	0.185997	0.022035	0	0	0	0.204294	0	0.433934	0.560429	0.51557	0.193339	0	0.225486	0.238494	0.0652209	0.163848
0.288137	1	0.58096	0.928715	0.0780796	0.312137	0.908708	0.898133	0.209756	0.111586	0.233677	0.534248	0.650883	0.67247	0.650883	0	0.0488011	0.0806534		0.0406884	1	0.32793	0.552919	0.142419	0	0	0	0	0.031259	0.0303433	0	0	0.111185	0.40152	0.71755	0.16486	0.485214
0.207929	1	0.165302	0	0	0.460333	0.0164913	0.233948	0.230573	0.288701	0.0999277	0	0.363126	0.0361421	0	0.00704314	0	0.0654854		0.369124	1	0.343863	0.240278	0.423522	0.350145	0.124232	0.0413123	0.347306	0.282033	0.465512	0.141238	0.00951427	0.0779403	0.086532	0.0859987	0.204609	0.0588179
0.61353	1	0	0	0.521304	0	0	0	0.0406483	0	0	0	0	0	0	0	0	0		0.0417464	1	0	0	0	0	0	0.770673	0.616539	0	0.340184	0.686266	0.049242	0	0	0	0.0293912	0.0723412
0.529254	1	0	0	0	0	0.0156778	0.292173	0.0738999	0.044643	0.25318	0	0	0.117335	0.0170145	0.0749701	0.219665	0.0976253		0.214888	1	0.136268	0.0253686	0	0	0	0	0	0.128933	0.588377	0.828086	0.414043	0.342065	0.0433002	0.46015	0.239508	0.744344
0.343798	1	0	0	0	0	0	0.123633	0.290317	0.276725	0	0	0	0	0.0209208	0	0	0		0.241865	1	0.343982	0.0183623	0	0	0.286094	0	0.0259311	0.0376114	0.101892	0	0.0616646	0.199906	0	0.0312285	0.513684	0.356554
0.51515	1	0.162276	0.614912	0	0	0.334712	0.129624	0.197909	0.00547178	0	0	0	0.0195346	0	0.122547	0	0.800012		0.194941	1	0.673353	0.225271	0.0746193	0	0	0.378039	0.276878	0.267818	0	0.131951	0	0.199776	0.0104135	0.139432	0.347274	0.253466
0.122328	1	0.283989	0	0	0.504455	0.222972	0.0207385	0.445298	0.0441513	0	0	0	0	0.0913669	0	0.361159	0		0.691182	1	0.641202	0.574974	0.277284	0.105885	0.0577554	0.0032639	0.10532	0.341027	0.394914	0.550073	0.636236	0.865652	0.787171	0.71221	0.351036	0.193406
0.172096	1	0.479077	0.0680058	0.0806279	0.0283691	0	0.0823202	0	0.197858	0.0694726	0.00978817	0.295036	0.25718	0.307785	0.134868	0.393408	0.009147		0.287018	1	0.141229	0.133896	0.618816	0.988118	0.511269	0.712257	0.353413	0.0981044	0	0	0.0688345	0.406079	0.417359	0.747264	0.00757354	0.00788492
0.409644	1	0.692875	0.630132	0.218421	0.0260999	0.220026	0.234909	0.117262	0.2713	0.244114	0.132663	0.0394775	0.0369707	0.0430342	0.0395522	0.283251	0.366842		0.765764	1	0.969802	0.124124	0	0	0	0	0.356462	0.289532	0.453116	0.504846	0.0699309	0.00919932	0	0	0	0
0.182814	1	0.748557	0.364388	0.0106892	0.0575039	0.0742235	0.0124904	0.175527	0.381377	0.429393	0.77203	0.542487	0.394247	0.757297	0.1329	0.0412853	0.0998803		0.877707	1	0.988474	0.421624	0.571032	0.112267	0.34359	0.147451	0.0655844	0.718723	0.230356	0.16657	0.720443	0.419048	0.217117	0.638988	0.555245	0.603347
0.214191	1	0.776608	0.533141	0.19468	0.231329	0.162178	0.0717327	0.125265	0.101327	0.347736	0.435685	0.267781	0.265505	0.132349	0.215229	0	0.0290338		0.460705	1	0.428741	0	0	0	0.334188	0.282427	0.0302288	0.134325	0	0	0.0579422	0.41573	0	0.954255	0.672492	0.10473
0.185857	1	0.369413	0	0.221278	0	0	0	0.550233	0.3839	0.0457824	0	0.145572	0.0274969	0.00451257	0.0677899	0	0		0.293473	1	0.0619123	0	0.1363	0	0	0	0.0162287	0.563459	0.432427	0.116769	0.490467	0.217108	0.305549	0.709949	0.239775	0.186344
0.226822	1	0.125283	0.0489787	0.0315892	0.0100786	0	0	0	0.166129	0.034858	0	0.0540594	0.0162178	0.37833	0.114267	0.247144	0.0144118		0.456666	1	0.155555	0.0314315	0.321169	0.107815	0.0825444	0.253906	0.251376	0.756819	0.538383	0.143902	0.501386	0.0699755	0.467508	0.729135	0.103471	0.348182
0.468041	1	0.373367	0.22158	0.275167	0.413119	0.264728	0.352691	0.367539	0.432536	0.244916	0.642628	0.561315	0.0658846	0.198811	0.233013	0	0.160016		0.345463	1	0.603509	0.174155	0.474828	0.921996	0	0	0.400247	0.323799	0.0825255	0	0	0	0.461856	0	0.67667	0.445713
0.135846	1	0.721734	0.273846	0.559226	0.385188	0.463704	0.0336841	0.0373793	0.462561	0.970941	0.0103061	0.389763	0.311738	0.0613156	0.420324	0	0		0.355416	1	0.823835	0.482987	0.420055	0.431538	0.412845	0	0.616388	0.75762	0.381176	0.307525	0.394652	0.0986629	0.103699	0.544385	0.87064	0.701795
0.315387	1	0.785482	0.4995	0.329911	0.0599839	0.165387	0.280196	0	0.0125892	0.0955951	0.0155488	0.00159582	0.0164516	0.0793646	0.0224365	0.0585004	0.109367		0.129968	1	0.407719	0	0.316239	0	0	0	0.190809	0.0210464	0.798782	0.821604	0.545379	0	0	0	0.358454	0.363006
0.217391	1	0	0	0	0	0	0	0	0.590964	0	0	0	0	0	0.0491322	0	0		0.886203	1	0.315872	0.354369	0.830651	0.506227	0.435952	0.634179	0.299648	0.112973	0.160757	0.0270239	0	0	0	0	0.0453421	0.304157
0.143029	1	0.683297	0	0.162488	0.652582	0.237848	0.0378657	0.996241	0.946621	0.978135	0.918566	0.302542	0.461758	0.188057	0.0643676	0	0.0218021		0.307224	0.532531	1	0.510354	0.298843	0.316592	0.226697	0.473527	0.59033	0.303008	0.342781	0.377953	0.378668	0.378132	0.457354	0.461465	0.42563	0.271756
0.733759	1	0.489309	0.867953	0.172849	0.0767768	0.344103	0.305849	0.16168	0.244204	0.460575	0.603609	0.614984	0.607263	0.128887	0.0797564	0.203019	0		0.542504	0.809934	1	0.670186	0.420806	0.446149	0.425956	0.649618	0.52079	0.294778	0.257442	0.291807	0.288866	0.369798	0.456197	0.395006	0.343055	0.342929
0.458787	1	0.882	0	0.0179122	0	0.782158	0.375667	0	0.113218	0	0	0	0	0	0	0	0.167966		0.289579	0.279638	1	0.130625	0.113608	0.571189	0.690217	0.194034	0.0455623	0.274794	0	0	0.0177138	0.12172	0.0853138	0.116337	0	0.828326
0.611797	1	0.520941	0.511591	0.256078	0.410701	0.59402	0.381338	0.19368	0.315682	0.549236	0.356347	0.207151	0	0	0.0113465	0.0567327	0.0365276		0.510069	0.503132	1	0	0.153785	0.0387311	0.241752	0.469184	0.391999	0.608606	0.0799649	0.17636	0	0.014527	0.274814	0.62693	0.101867	0.520314
0.790782	1	0.672271	0.370623	0.48411	0.369589	0	0	0.329012	0.187387	0.549692	0.471668	0.126841	0.0810459	0.168933	0.245854	0.276226	0.0134971		0.0639508	0.188456	1	0.42801	0.195961	0.0806571	0.608849	0.688657	0.478461	0.423184	0.240652	0	0	0.112357	0.187262	0.0381216	0.0901874	0.627594
0.0442177	1	0.667368	0.0901568	0.0293691	0	0.271161	0.164089	0.138487	0.167169	0	0	0.0797236	0	0	0	0	0.0240579		0.202195	0.0828383	1	0	0	0	0	0	0.107154	0	0	0	0	0	0	0	0	0
0.0863523	1	0.0277087	0.0797252	0.467758	0.675376	0.617426	0	0	0.116906	0.841513	0.680404	0.176759	0	0.317895	0	0	0.245054		0	0.138162	1	0.0669133	0	0.0919918	0	0.520085	0.173362	0	0	0	0	0	0	0	0	0.0370677
0.0646509	1	0.388461	0	0	0.0867581	0.6026	0.417466	0.112945	0.0224252	0.202053	0.309783	0	0	0	0	0	0		0.483542	0.665155	1	0.298289	0.213015	0	0.220446	0	0.11634	0.0973589	0.390978	0.273207	0.378852	0.363967	0.0982207	0.362927	0.297246	0.221753
0.109899	1	0.939793	0.840329	0.559043	0.183622	0.0988111	0.146636	0.0669005	0.0608366	0	0.0626129	0	0	0	0.179004	0.185477	0.0662753		0.725943	0.827018	1	0.305958	0	0	0	0	0.766247	0.159282	0.0889284	0	0.250951	0	0	0.118478	0.338576	0.577342
0.379573	1	0.635522	0.320236	0.140395	0.18209	0.157381	0.385262	0.331972	0.475346	0.0650894	0.0399014	0.115575	0	0	0	0	0.0234262		0.441901	0.156706	1	0.0658653	0.222295	0.129384	0.356095	0.278827	0.643041	0.757789	0.0125005	0.425016	0.0386264	0.180887	0.0669282	0	0.0704896	0.114822
0.457999	1	0.500915	0.165342	0.321626	0.311859	0.238554	0.0181806	0.102575	0	0.0140033	0.145765	0.234826	0.213821	0.0691958	0.0642159	0.031618	0.0285647		0.706594	0.850087	1	0.424608	0.516026	0	0.335281	0	0	0.0280663	0.316555	0.0249478	0.103629	0.067359	0	0	0	0.245401
0.498554	1	0.00978268	0	0.0661266	0.0952074	0	0	0.509554	0.152551	0	0	0	0.0631896	0.090806	0.172657	0.359702	0		0.301016	0.418077	1	0.278046	0.391792	0.471696	0.471696	0.558284	0.961521	0.280876	0.14333	0.0224856	0.0934016	0.121422	0.0467008	0.060711	0.00809481	0.485458
0.0405599	1	0.755192	0.439723	0.111075	0.00283245	0	0.121548	0.0675728	0.299546	0.163384	0.428253	0.122268	0.175926	0.588993	0.300193	0.426732	0.27542		0.163405	0	1	0	0	0	0.210037	0.0334167	0.281195	0.671277	0	0	0.0527684	0	0	0	0	0
0.627694	1	0.0787105	0	0.586943	0.714567	0.117389	0	0.00651279	0	0	0.0751905	0.0130887	0	0.00501669	0.38214	0.079462	0.0204027		0.250801	0.735043	1	0.623224	0.494943	0.509627	0.166102	0.541655	0.27032	0.142884	0.322854	0.339978	0.370008	0	0.746159	0.570385	0.441321	0.472744
0	1	0.617143	0	0	0	0	0	0	0	0	0	0	0	0.985368	0	0	0		0	0.0934582	1	0.218545	0.0526309	0	0.030949	0.410971	0.169845	0	0.00877831	0.113571	0.206393	0	0.11688	0.313434	0.0181257	0.486875
0	1	0.32775	0.223781	0	0	0	0	0	0	0.0959173	0.402853	0	0	0	0	0	0		0.360638	0.768022	1	0.200662	0.298737	0.884744	0.370181	0.68808	0.661408	0.317219	0.44736	0.310208	0.19804	0.066718	0.284684	0.501577	0.183669	0.497593
0	1	0	0	0	0	0	0	0.277668	0	0.0951119	0.11506	0.0225326	0	0.136502	0	0	0		0.114345	0.622328	1	0.193782	0.111226	0.597625	0.153278	0.258114	0.240761	0.432795	0.184126	0.272111	0.123438	0	0.197073	0.490395	0.0631554	0.557163
0.892676	1	0.23076	0.577142	0.21339	0.460502	0.104328	0	0.448394	0.21564	0.691187	0.173733	0	0.0422093	0.354647	0.62707	0.122225	0.380099		0.134124	0.213181	1	0.225535	0.501161	0.741517	0	0	0.303871	0.560972	0.15289	0	0	0	0.300837	0.643463	0	0.833898
0.673815	1	0.646347	0.238041	0.150032	0.0143676	0.141964	0.0245141	0.117157	0.0987456	0.300603	0.987284	0.701101	0.0213278	0.0290788	0.00975547	0.102604	0.499163		0.253111	0.777496	1	0.201414	0.410972	0.171551	0	0.817243	0.529535	0.459547	0.329171	0.133227	0	0	0	0	0	0
0.137493	1	0.692256	0	0.0160402	0	0.436342	0.231529	0.0208393	0.0252197	0.0299801	0	0	0	0	0	0	0		0.056159	0.170947	1	0.211211	0.267137	0.513317	0.346665	0.88777	0.233795	0.130472	0.182496	0.0279227	0.0908333	0.0202341	0.317432	0.321057	0.058149	0.550189
0.664901	1	0.934933	0.340383	0	0	0	0	0.152554	0.166937	0	0.0215362	0.346236	0.245513	0	0	0.284952	0.900779		0.235549	0.30166	1	0.579279	0.415684	0.240138	0.15016	0.334645	0.191641	0.286029	0.0327213	0.035219	0	0	0.274457	0.160654	0	0
0.35516	1	0.479596	0	0	0.131737	0	0	0.0644714	0.28133	0	0	0	0.423675	0.490668	0.253512	0	0.331885		0.133915	0.2125	1	0	0.00724301	0.00965735	0.405312	0	0.836422	0.498478	0.125609	0.759852	0.26123	0.0201951	0	0.0713435	0.600583	0.980539
0.989539	1	0.786776	0.061324	0	0	0	0	0	0.889859	0.700441	0	0	0	0	0	0.0393521	0.602419		0.330159	0.646315	1	0.537069	0.72545	0.483381	0.523425	0.74965	0.265234	0.225168	0.228196	0.16537	0.29655	0.231858	0.0543915	0.211878	0.123655	0.0769323
0.167274	1	0.729667	0.157427	0	0.022448	0.215408	0.160455	0.0917406	0.218249	0.376908	0.302544	0.382793	0.256399	0.0582159	0.0413653	0.0248814	0.0217117		0.844439	0.138245	1	0.711035	0.346706	0.309678	0.475437	0.402342	0.885782	0.851504	0.517255	0.676789	0.328922	0.311795	0.390825	0.627912	0.565022	0.601172
0.278507	1	0.0945184	0.187111	0.112267	0.0482617	0.0503429	0.0616576	0.326375	0.1302	0	0	0	0	0	0	0	0.207271		0.0977845	0.37742	1	0.693071	0.111718	0.0155572	0.0353191	0	0.61539	0.369929	0.362515	0.300677	0.321712	0.365489	0.411714	0.127932	0.0552193	0.167755
0.827964	1	0.206793	0.227524	0.146483	0.0307716	0	0	0	0.0545815	0.730447	0.392275	0.472838	0	0	0.188842	0	0.0490761		0.483962	0.768341	1	0.471392	0.0837644	0.145309	0.0446136	0.519435	0.76476	0.444827	0.186331	0.514719	0.461829	0.218185	0.287326	0.0893369	0.312234	0.0695865
0.0774683	1	0.513385	0.240078	0.209931	0.246844	0	0.154767	0.477818	0.372215	0.00796524	0.115474	0.213039	0	0.0693243	0.102871	0	0		0.0678948	0.201607	1	0.877317	0.745681	0.311243	0.511753	0.585208	0.404148	0.194695	0.231076	0.273818	0.461057	0.173984	0.676528	0.269033	0.1214	0.147839
0.497309	1	0.442878	0.442449	0.470125	0.350672	0.239781	0.187386	0.246597	0.417049	0.0860167	0.209529	0.0371896	0	0.105612	0	0	0.00123311		0.720049	0.717208	1	0.580357	0.337037	0.283899	0.266349	0.198817	0.223506	0.208559	0.0972676	0.108982	0.178748	0.333269	0.409628	0.248995	0.217441	0.737228
0.231671	1	0.516147	0.505231	0.519739	0.426154	0.145036	0.13388	0.282496	0.193036	0.22615	0.254463	0.265499	0	0.0660841	0.108471	0	0		0.40438	0.0368905	1	0.725562	0.590826	0.855353	0.887179	0.555501	0.114551	0.833548	0.827116	0.182873	0.0516873	0.921275	0.444362	0.150699	0.0844381	0.70923
0.408594	1	0.398871	0.388237	0.373322	0.332106	0.176334	0.244632	0.241398	0.216819	0.127582	0.294845	0.0499605	0.104924	0.10968	0	0	8.69308e-05		0.787444	0.218241	1	0.618403	0	0	0	0.578931	0.0399315	0.171584	0.593733	0	0	0.164099	0	0.00413146	0.0181064	0.736279
0.278865	1	0.56078	0.0893687	0.0893687	0.111714	0.125684	0.116016	0.0702752	0.155151	0.010385	0.0973588	0.24626	0.399648	0.358218	0.237909	0.0672639	0.124398		0.427091	0.213437	1	0.324456	0.069315	0	0.0906953	0.456834	0.629362	0.119847	0	0.317401	0.0329767	0.0471588	0.278513	0.07398	0.00252197	0.694876
0.479621	1	0.204736	0	0	0	0	0.0308333	0.133005	0.0630394	0	0	0	0	0	0.134361	0.956098	0.000875379		0.361223	0.204018	1	0.575163	0	0	0	0	0	0	0	0	0	0	0	0	0	0
0.161811	1	0.481727	0.366012	0.183006	0	0.617762	0.83343	0.70843	0.277386	0.889383	0.481988	0.212662	0.0178458	0	0	0.22172	0.106357		0.338212	0.585355	1	0.854432	0.55278	0.217852	0.309463	0.254647	0.183118	0.105981	0.112136	0.16094	0.0330546	0.0851606	0.149136	0.365536	0.478649	0.173018
0.225047	1	0.91279	0.467501	0	0.0130956	0	0.0133881	0.00576185	0.264235	0.306639	0.20902	0.143524	0.354217	0.124669	0.0261562	0	0.267991		0.099329	0.247456	1	0.803079	0.238385	0	0.414305	0.0436921	0.0327504	0.00168844	0.077865	0.328763	0.300593	0.480948	0	0.514784	0.101021	0.181319
0.403967	1	0.262903	0	0	0.0861321	0	0	0.173559	0.402257	0.385805	0.86017	0.754374	0.146751	0	0	0	0		0.233987	0	1	0.0766569	0	0	0	0	0	0.193079	0	0	0	0.164704	0.0277033	0	0.136264	0
0.782639	1	0.596518	0.03284	0.0341138	0.539503	0.311813	0.0155932	0.545282	0.506279	0.25072	0.212377	0	0	0	0	0	0.254832		0.021605	0.295279	1	0.243897	0	0	0.0762409	0	0.215687	0.0476863	0	0.128163	0	0.44212	0	0.205306	0.632621	0.306662
0.365436	1	0.145354	0.0374003	0	0	0	0	0.174382	0.242923	0.220665	0.334375	0.318712	0.100626	0.0803068	0	0	0.162682		0.24185	0	1	0.268984	0	0	0	0.479325	0.309594	0.309016	0	0	0.0922861	0.662805	0	0.0597892	0.27171	0.375337
0.150643	1	0.201201	0.41612	0.041612	0	0	0	0.12382	0	0	0.00688111	0	0	0	0	0	0.0740212		0	0.418693	1	0.217195	0	0	0	0	0	0.178836	0	0	0	0	0	0	0	0.78158
0.00351078	1	0.9311	0.0275797	0	0	0	0.15816	0.907557	0.116247	0	0.325431	0	0	0	0	0	0.0114291		0	0.0961538	1	0.513369	0	0	0	0	0.146508	0.016411	0.0341409	0.379657	0	0	0	0	0	0.135853
0.0873749	1	0.895859	0.938738	0.720219	0.351542	0.300292	0.307825	0.507281	0.559856	0.326419	0.349355	0.0702154	0.0374289	0.158385	0.212549	0.171373	0.0710797		0.123394	0.460886	1	0.291567	0	0	0	0	0	0	0	0	0	0.363096	0	0.159121	0.792972	0.596585
0.28259	1	0.368309	0	0	0	0	0.118505	0.190618	0.200555	0.157895	0.581166	0.927319	0.885048	0.405897	0	0	0		0.0911945	0.281388	1	0.081448	0	0	0	0	0.272118	0.251276	0	0	0	0.140907	0	0.10289	0.0221755	0.490889
0.922469	1	0	0	0	0	0	0.177909	0.110947	0.0416354	0.0692088	0.0289132	0	0.279156	0.307641	0	0	0.466		0.0510395	0.424444	1	0.250602	0.265571	0.509707	0.540516	0.0588794	0.0143647	0.0647651	0.187968	0	0	0	0	0	0	0.0469686
0.459084	1	0.817674	0.551987	0.985558	0.920256	0.924966	0.474245	0.419025	0.666248	0.599956	0.670986	0.501902	0.276981	0.185257	0.200598	0.0723489	0.176077		0	0.192308	1	0.535247	0	0	0	0	0.351001	0.178686	0.131523	0.802652	0.087562	0	0	0	0.210319	0
0.226742	1	0.607703	0.411302	0.399697	0.455775	0.172796	0.165169	0.144449	0.100906	0.206205	0.496371	0.441359	0.563092	0.483727	0.631142	0.273858	0.270043		0.377245	0.827475	1	0.586017	0.159223	0.0530745	0.136569	0.305538	0.352986	0.259372	0.195609	0.415783	0.530558	0.511274	0.138291	0.316693	0.706741	0.14028
0.234075	1	0.789284	0.695435	0.685078	0.497369	0.455852	0.290804	0.130735	0.29412	0.419991	0.364039	0.578489	0.376471	0.173186	0.191382	0.00479884	0		0.0981949	0.364606	1	0.4307	0	0	0	0.147454	0.368634	0.126718	0.100635	0.17694	0	0.274873	0.235424	0.0510086	0.25223	0.115004
0.216361	1	0	0	0	0	0	0	0.129106	0	0	0.0317447	0	0	0	0	0	0		0.355829	0.642311	1	0.41226	0.0504076	0.060104	0.197321	0.0436716	0.0401206	0.326172	0.655997	0.264585	0.109215	0.153811	0.023906	0.0254076	0.292842	0.0962145
0.727425	1	0.843181	0.992669	0	0.0904053	0.0896735	0.46681	0.247135	0.108797	0.125443	0.202161	0.543402	0.592802	0.182401	0	0.0951518	0.199599		0.445154	0.882123	1	0.643083	0.496456	0.473741	0.263358	0	0.0153015	0.514968	0.836145	0.551034	0.57509	0.669387	0.784897	0.81659	0.647362	0.00276339
0.751475	1	0.782737	0.377075	0.00999526	0.172339	0	0	0.266515	0.240952	0.0436082	0.425368	0.13488	0	0.0431305	0.256428	0.435927	0.363673		0.590328	0.323828	1	0.388532	0.147042	0.196043	0.196043	0.196043	0.050513	0.530615	0.864707	0.683424	0.109181	0.0647798	0.0806535	0.298271	0.333649	0.666529
0.110227	1	0.00743359	0.206467	0.330347	0	0.0671011	0.271415	0.604234	0.290026	0.539387	0	0	0	0	0.0166569	0.0735178	0.162907		0.26259	0.699957	1	0.392497	0.390473	0.601907	0.242614	0.007127	0	0	0.421098	0.147384	0.18054	0.0237804	0.137141	0.0419412	0.0360176	0
0.0402558	1	0	0.324122	0	0	0.012672	0.10961	0.0932986	0.18096	0	0	0	0	0	0	0	0.0310709		0.585986	0.921541	1	0.333333	0.125332	0.505409	0.435627	0	0.46377	0.795504	0.935384	0.708396	0.570292	0.414788	0.0172246	0.0835087	0.487768	0.320393
0.420473	1	0.013198	0.0590387	0.163171	0.0167031	0.0222043	0.184751	0.163954	0.141796	0.451716	0.144398	0	0	0	0.0130982	0.00962505	0.0263601		0.00423526	0.402321	1	0.333333	0	0	0.189966	0	0.199008	0	0	0	0	0	0	0.194286	0.167449	0
0.13695	1	0	0	0	0	0.535364	0.0722316	0.043709	0.0170947	0.113248	0	0	0	0	0	0	0.294221		0.26159	0.613926	1	0.879308	0.0481673	0	0	0	0	0.0529179	0	0.408402	0.111607	0.0724242	0	0	0	0.0883767
0.401959	1	0	0	0	0	0.0926235	0.084842	0	0.0379656	0.209247	0	0	0	0	0	0.016718	0.120574		0.480875	0.809578	1	0.543815	0.217426	0	0	0.291183	0.306158	0.532668	0.460018	0.818468	0.978424	0.401181	0.161442	0.606724	0.466143	0.727193
0.0278912	1	0	0	0	0	0.0127762	0	0.0732975	0.115608	0.0166578	0	0	0	0	0	0	0.0768546		0.410054	0.950819	1	0.535943	0.334974	0	0.0198603	0.0119864	0.0139315	0.222034	0.497439	0.388687	0.357877	0.156688	0.607987	0.558318	0.246964	0.0146698
0.0203976	1	0.0689415	0	0	0	0.159908	0.0728158	0.0984638	0.0319741	0	0	0	0	0	0	0.00308881	0.0727586		0.0563738	0.377655	1	0	0.570151	0.760398	0.0313252	0	0.0628637	0.106385	0	0	0	0.0912089	0.547253	0	0.0619165	0.1104
0.0575978	1	0.218782	0.108977	0.425278	0	0	0.352448	0.328245	0.0216706	0	0	0.476658	0	0	0	0.0263954	0		0.285204	0.0275709	1	0.50438	0	0	0	0	0.93369	0.876564	0.990835	0	0	0	0	0	0	0.348844
0.310061	1	0.0257032	0.0891198	0.131518	0.010209	0.0063222	0.598789	0.359596	0.241573	0.0989374	0.346449	0.109289	0	0	0.054779	0.00167177	0.0188866		0.259201	0.175109	1	0.756331	0.244476	0.196834	0.00836852	0.0139435	0.0900304	0.133375	0.178415	0.159397	0.5158	0.546999	0.625038	0.502198	0	0.206687
0.593336	1	0.0646166	0.18959	0	0	0.091047	0.00697101	0.0216912	0.134684	0.0324278	0	0	0	0.214902	0	0.0155098	0.127786		0.951651	0.571825	1	0.865025	0.243681	0	0.0841734	0.254163	0.0564087	0.1438	0.300257	0.521083	0	0.326536	0	0.0586444	0.172002	0.955561
0.152887	1	0.842575	0.134992	0.178265	0.0341905	0.109411	0.305683	0.198914	0	0	0	0	0	0	0	0	0		0	0.538713	1	0.531281	0.7724	0.874466	0.211648	0	0.803977	0.838864	0	0	0	0	0.146486	0.585943	0.498464	0.0311054
0.195953	1	0.0642957	0	0.148357	0	0.0132266	0.27739	0.179866	0.647884	0.311986	0	0.0838117	0	0	0.306746	0.963921	0.00132036		0.188044	0.721442	1	0.243206	0	0.0491257	0.190888	0	0.1986	0.0129484	0.188864	0	0	0	0.129048	0.530761	0.608036	0
0.151489	1	0.666667	0	0	0	0.0226241	0	0.065863	0.279265	0.0158734	0	0	0	0	0.228026	0	0.515663		0.197681	0	0.666667	1	0.25	0	0	0.558095	0.730859	0	0	0	0	0	0	0.0481211	0	0.194604
0.361351	1	0.134512	0.143073	0.185302	0.287605	0.306612	0.309351	0.140675	0.0783617	0	0.0986739	0.134662	0.0745504	0.686063	0.8727	0.904456	0.248752		0.557248	0.149027	0.010101	1	0	0	0	0	0.393947	0.844363	0.10903	0	0	0	0.0440746	0	0	0.745727
0.386285	1	0	0	0	0	0.0965671	0.561533	0.119735	0	0	0	0	0	0	0.463912	0.151017	0		0.0788946	0.0133188	0.781303	1	0.703173	0	0	0	0.588912	0.355468	0.149223	0	0	0	0	0	0	0
0.180272	1	0.444164	0.444164	0	0	0.0223093	0.129955	0.026616	0.344607	0.730835	0.254978	0.708272	0	0	0.359802	0	0		0.522861	0.0836806	0.394912	1	0.194744	0	0.974185	0.324728	0.275969	0.0333904	0.225706	0.112853	0	0	0.0506698	0.307985	0	0.155405
0.591343	1	0.0380304	0.0532726	0.423753	0.490167	0.277521	0.331681	0.191183	0.0556719	0.909466	0.637165	0.0460671	0.0865656	0.134736	0.0775903	0.0189694	0		0.122591	0.132915	0.0731722	1	0.186694	0	0.474332	0.713482	0.0194461	0.762609	0.173193	0	0	0	0	0	0	0.0542204
0.408625	1	0.683564	0.0483514	0	0	0.0838306	0.483644	0.189367	0.00131241	0.0358182	0.030392	0.0704547	0.0103765	0	0.193468	0.124372	0.0230294		0.367304	0.123341	0.511756	1	0.803629	0.570077	0.771227	0.564612	0.205543	0.226182	0.125594	0.0632658	0	0	0.681325	0.765439	0	0.131607
0.138073	1	0.259002	0	0.175484	0.214878	0.243585	0.163486	0.153542	0.0564464	0.0918194	0.354092	0	0	0	0	0	0		0.135393	0.0659688	0.162432	1	0.218993	0	0.230473	0.0517864	0.26809	0.522047	0.0973702	0	0	0	0.0660471	0.036672	0	0.0936297
0.521894	1	0.16512	0	0	0	0.152	0.200529	0.526667	0.258826	0	0	0	0	0	0	0.0898541	0.189954		0.327445	0.262893	0.156381	1	0.467555	0.0413517	0.126632	0.0684981	0.171446	0.347119	0.0518059	0.0957069	0.277291	0	0.0119199	0.0741728	0.378391	0.102335
0.951631	1	0.169042	0	0	0	0	0.186181	0.563587	0	0	0	0	0	0	0	0	0.0728959		0	0	0.811541	1	0.423364	0.372647	0	0	0.972968	0.238723	0.0524254	0	0	0	0	0	0	0
0.0840222	1	0.373091	0.269762	0	0	0.0939822	0.146063	0.340162	0.150307	0	0	0	0	0	0.307025	0.0580831	0		0.304829	0.692103	0	1	0.141871	0.321575	0	0.118531	0.439918	0.758295	0.51642	0.383679	0.358069	0	0	0	0	0.297523
0.739356	1	0	0	0	0	0	0.0297945	0.300431	0.0354845	0.0691304	0	0	0	0	0	0	0.307847		0.104517	0.861187	0	1	0.631867	0.319989	0	0	0.148281	0.26339	0.0685409	0	0	0	0.369188	0.0466982	0.146766	0.374958
0.642895	1	0.553369	0.213068	0.233803	0.233803	0.0883254	0.162897	0.0673222	0.218412	0.310297	0.411935	0.0994592	0.0114789	0.259477	0.609279	0.269705	0.38443		0.967594	0	0	1	0.0353558	0.169215	0	0.162756	0.0961059	0.535164	0.249219	0.23642	0.593726	0	0	0	0	0.707263
0.785652	1	0	0	0	0	0.164551	0	0.107219	0.14419	0.0662555	0.21173	0	0.0720945	0.283104	0.376166	0.0772366	0		0.0735138	0.0583842	0.525114	1	0.129528	0.0182056	0.247383	0.475775	0.489228	0.126985	0.0999892	0.460149	0	0.107612	0.0365515	0.157113	0.224447	0.700934
0.793141	1	0	0	0	0.224122	0.0237419	0.201507	0.666668	0.895294	0.579496	0.37997	0.667573	0.0905222	0.165509	0.0418451	0.245034	0.140783		0.00693328	0.0183528	0.321552	1	0.837286	0.0757248	0	0	0.0350889	0.276998	0	0	0	0.0449036	0	0	0.024247	0
0.79623	1	0.785624	0.707009	0.365012	0.365012	0.344733	0.237243	0.0431839	0.544891	0.573604	0.673323	0.201484	0	0.290655	0.782801	0.4592	0.499896		0.430531	0.340995	0.216852	1	0.356928	0.141148	0.993264	0.0839406	0.14893	0.229352	0.95786	0.827322	0.264554	0.0911637	0.116519	0.546824	0.324149	0.143058
0.938267	0.623255	1	0.351863	0.26047	0.123177	0.118041	0.136808	0.440726	0.680833	0.421097	0.281775	0.402181	0.196125	0.0119155	0.236962	0.0728212	0.160248		0.149468	0.171164	0.245137	1	0.831221	0.586368	0.185095	0.0404692	0.132699	0.110612	0	0	0	0.0114901	0.358039	0.134119	0	0.0204244
0.311728	0.708973	1	0.447284	0.0549964	0.234815	0.124104	0.0192954	0.0855966	0.0587799	0	0	0	0.0898695	0.000675201	0.0108432	0.0244772	0.173844		0.187636	0.0217222	0.173252	1	0.944067	0.595073	0.506186	0.641203	0.278387	0.555714	0.933177	0.872517	0.230763	0.0631592	0.208599	0.331068	0.041675	0.100094
0.0399011	0.43181	1	0.0517064	0	0.473448	0	0.00887104	0.0185325	0.00892597	0	0.678373	0.774798	0.711175	0.0101691	0	0.0295509	0.123382		0.812133	0.783067	0.465298	1	0.284046	0.00807463	0.569512	0.351443	0.808688	0.73165	0.680885	0.0226529	0.387955	0.290966	0	0.0192332	0.0569076	0.194848
0.129581	0.523274	1	0	0	0.346004	0	0.66354	0.703098	0.52568	0.0275141	0	0	0.325432	0.902743	0.153903	0.132194	0.151659		0.344506	0.486133	0.764619	1	0.282923	0.217143	0.366187	0.24047	0.170558	0.36221	0.70104	0.885379	0.792959	0.22591	0.41078	0.179541	0.184689	0.418688
0.129075	0.406223	1	0.642495	0.898394	0	0.23477	0.641448	0.242159	0.268825	0.587579	0.926405	0.829484	0.748631	0.842866	0.883135	0.208189	0.165467		0.145595	0.926246	0.63889	1	0.744573	0.0823793	0.0580271	0.143134	0.240975	0.129087	0	0.0925527	0.0569785	0.167751	0.0483281	0.153031	0.190297	0.0610371
0.489143	0.939084	1	0	0	0.257047	0.027911	0.399128	0.267961	0.303371	0.600043	0.459851	0.10248	0.129079	0.114477	0.206117	0.142426	0.848099		0.887961	0.14664	0.384851	1	0.47826	0.132656	0.113072	0.172064	0.0738227	0.186012	0.598552	0.418094	0.459451	0.266686	0.0771891	0.26134	0.172925	0.654644
0	0	1	0.774494	0.133101	0.30115	0.386476	0.164378	0.500412	0.255643	0	0	0	0.800155	0.125022	0	0	0.00966198		0.00387882	0.393018	0.347156	1	0.959906	0.580635	0.301184	0.00831197	0.237535	0.0340102	0.170502	0.397729	0.0276896	0	0.337125	0.618363	0.0277486	0.0918445
0.104092	0.493046	1	0.0698364	0.10142	0.28033	0.0590411	0.0985172	0.0347212	0.169367	0	0	0	0.0913141	0.000428791	0.00249138	0.0753133	0.0833922		0.156294	0.301602	0.72247	1	0.64502	0.640551	0.567852	0.574294	0.579647	0.417194	0.613782	0.809519	0.794038	0.941471	0.587936	0.692632	0.516375	0.193606
0.14691	0.0517039	1	0	0	0	0	0.273399	0.0490507	0.00975687	0	0	0	0	0.0842275	0	0.0263328	0.0824192		0.0760674	0.152882	0.0545038	1	0.479314	0.0671218	0.192053	0.282402	0.392684	0.516918	0	0.0496249	0.342017	0.111286	0	0.0736032	0.203668	0.242406
0.119777	0.984574	1	0.687536	0.244903	0.266669	0.553635	0.211505	0.44912	0.144708	0.12233	0.191145	0.328018	0	0.166627	0.119259	0.926584	0.561154		0.415887	0.908819	0.733165	1	0.4155	0	0	0	0	0.298772	0	0	0	0.0466495	0	0.146488	0.280585	0
0.562975	0.521237	1	0.54676	0	0.105092	0.131829	0.147856	0.245795	0.0712971	0.156771	0.332285	0.335463	0	0.395388	0.164253	0.400743	0.454393		0.0917672	0.117099	0.330339	1	0.584716	0.184701	0.477203	0.596155	0.289011	0.229751	0.512945	0.561459	0.369223	0.209707	0.140985	0.42239	0.335435	0.0824516
0.396229	0.266362	1	0.101737	0.312972	0.520049	0.928842	0.584826	0.480198	0.0656081	0.421778	0.538389	0.00990998	0.381916	0.598659	0.136969	0	0		0.0541142	0.0658305	0.697127	1	0.443464	0.487004	0.517539	0.371793	0.392211	0.36007	0	0.106554	0.25222	0.399543	0.436966	0.202508	0.0851713	0.0585171
0.0473035	0.981379	1	0.395041	0.0197481	0	0	0.516912	0.657124	0.170642	0.386241	0.789875	0.0968437	0.190945	0.0410048	0.0396991	0	0		0.0788497	0.465895	0.605014	1	0.97674	0.812545	0.4575	0.493718	0.319351	0.47727	0.714316	0.630639	0.374526	0.298891	0.459995	0.501313	0.299279	0.14108
0	0.70463	1	0.114079	0.177015	0.316804	0.186165	0.0775668	0.0514777	0.227808	0.144176	0.123048	0.430869	0.194686	0.208486	0.162307	0	0		0.224518	0.685287	0.736033	1	0.625801	0.600222	0.188273	0.0251071	0.0688893	0.320331	0.878066	0.774017	0.260241	0.152991	0.0138531	0.137939	0.494268	0.532835
0.544398	0.661685	1	0.183879	0.0446002	0	0	0.0982765	0.31044	0.300155	0.322772	0	0.119637	0.262485	0.239091	0.0141802	0.151671	0		0.269597	0.459666	0.883099	1	0.868202	0	0	0.201477	0.339353	0.366103	0.457525	0	0	0	0.691909	0.0801985	0	0
0.939334	0.0303992	1	0.0807304	0.0984454	0	0	0.180969	0.241176	0	0	0	0.0343905	0	0	0.275923	0	0		0.11248	0.498737	0.53125	1	0.419753	0	0	0	0	0.0459124	0	0	0.624605	0.0284775	0	0	0	0.357013
0.188053	0.187159	1	0	0	0	0	0	0.41045	0.372545	0.221763	0.0703635	0.0272711	0	0.0578561	0.090684	0	0.0548453		0	0.256073	0.349714	1	0	0.22021	0.041724	0.0104375	0.317935	0.0396168	0	0	0	0.378133	0	0.187469	0.0262223	0
0.455464	0.145713	1	0.246957	0	0	0.250869	0.22565	0.18198	0	0	0.0864262	0.426878	0.0499149	0.0386759	0.150212	0.635474	0.815573		0	0	0.858738	1	0	0	0	0.371841	0	0.00523412	0	0.431202	0	0	0	0	0.0128684	0.265066
0.0334748	0.625508	1	0.941739	0.293308	0.0908422	0.304755	0.103396	0.441862	0.176713	0.191851	0.383296	0.11872	0	0.0285197	0.0349733	0.0823603	0.164657		0.0104089	0.231703	0.347121	1	0.108325	0.0771532	0.121821	0	0	0	0	0	0	0	0	0	0.0122662	0
0	0.191849	1	0.748887	0.510898	0	0.337379	0.566349	0.683039	0.214819	0.0398902	0.997566	0.697001	0.708899	0.476548	0.00663661	0.0321115	0.217864		0.0307117	0	0.49294	1	0.690698	0.121888	0	0	0.0574663	0.413757	0	0	0	0.0847721	0.182966	0.822087	0	0.120697
0.242963	0.637458	1	0.279326	0.204863	0.100299	0.0610563	0.457991	0.0872978	0.488243	0.0925294	0.267755	0.411689	0.184673	0.181688	0.102729	0.141504	0.125789		0.12355	0.100409	0.113188	1	0.773405	0.400347	0.625292	0.164414	0	0.330234	0.426699	0.573498	0.680291	0.771969	0.579693	0.154359	0.0797399	0.114057
0.602218	0.525951	1	0.938989	0.131085	0.00616084	0.0960927	0	0.299941	0.201617	0.297547	0.205018	0.408438	0.359683	0.385705	0.345978	0.465415	0.670976		0.0110882	0	0.25	1	0.778378	0	0	0	0	0.361162	0.869046	0	0	0	0	0	0	0.0582722
0.618904	0.91249	1	0.0548007	0.0171463	0.00295954	0.0343025	0	0	0.187426	0.0133812	0	0.0786585	0.0183536	0	0	0.241226	0.121812		0.266867	0.620909	0.459661	1	0.299955	0.0811929	0.0310607	0.150083	0.303192	0.23695	0.403364	0.728115	0.685511	0.629079	0.550742	0.627116	0.728759	0.0614084
0	0.3125	1	0.824176	0	0	0	0	0.593888	0.267067	0.303502	0.708179	0	0	0.123586	0.246971	0.117605	0.0336424		0.319446	0.401712	0.417121	1	0.989196	0.282577	0.411454	0	0.480307	0.725753	0.580761	0	0	0	0.580275	0.580275	0.842143	0.36467
0.317004	0	1	0	0	0	0	0	0.563819	0	0	0	0	0	0	0	0	0		0.0821354	0	0.187037	1	0.500442	0.137355	0	0	0.727301	0.502973	0	0.105903	0.164304	0	0	0	0	0.024299
0.323451	0.666257	1	0.402998	0.468007	0.343938	0.110229	0.100003	0.158588	0.295319	0.124223	0.111965	0.307121	0.405291	0.425284	0.212342	0.0658256	0.127309		0	0	0	1	0.436915	0	0	0	0.0405894	0	0	0.088272	0.372139	0	0	0	0.299369	0
0.533296	0.670861	1	0.0507702	0.00102873	0	0	0.245361	0.0891956	0.309534	0.519889	0.560395	0.314932	0.0759017	0.104921	0	0.198114	0.173552		0.297995	0.20068	0.653257	1	0	0.865306	0.0644362	0	0.243352	0.166386	0	0	0	0.0479934	0	0	0.146348	0
0.240319	0.718218	1	0.669169	0.118185	0.077783	0.119361	0.153244	0.195132	0.356506	0.240981	0	0.138906	0	0	0	0.0627423	0.115578		0.319523	0.099213	0.892291	1	0	0	0.345982	0.0614245	0.0350712	0.0790418	0.208473	0.0460264	0.411897	0.477192	0.622496	0.564326	0.199866	0.103616
0.211875	0.962335	1	0.544631	0.0950161	0.0230422	0.719638	0.340765	0.0245808	0.641712	0.0975584	0	0	0	0.102	0	0.275038	0		0	0	0.666955	1	0	0	0	0	0.395566	0	0.896435	0.204299	0	0	0	0	0	0
0.0892331	0.85976	1	0.893814	0.841303	0.691894	0.419032	0.339587	0.458092	0.707889	0.736582	0.692388	0.81724	0.935035	0.874336	0.616851	0.122061	0.0180953		0.660835	0.170814	0.673259	1	0.645999	0.609927	0.406797	0	0	0.361905	0.622029	0.0546172	0	0	0	0	0.420568	0.272837
0.197604	0	1	0.292208	0	0	0	0	0.0132435	0.0711657	0	0	0	0	0.311947	0.428927	0.969617	0.747128		0.0190122	0	0.0895916	1	1	1	0.832653	0.337439	0.842179	0.926168	0.452899	0	0	0	0	0	0	0
0.910718	0.109734	1	0.532776	0.0392655	0.0825938	0	0.0692011	0.169231	0.459681	0.607137	0.17061	0.181148	0.192684	0.00904229	0.373851	0.0975975	0.300513		0.0429818	0	0	0	1	0.190476	0	0.46035	0.230898	0.87776	0	0	0.0374664	0.148778	0.0550131	0	0	0
0.118393	0.812487	1	0.916524	0.623022	0.388876	0.396707	0.422561	0.522618	0.257425	0.2126	0.0512494	0.0451112	0.0468008	0.441951	0.257623	0	0.0342699		0.554354	0.0161789	0.0357436	0.527771	1	0.533481	0.267125	0	0.260776	0.133449	0	0.680473	0.00429772	0	0	0	0	0
0.137636	0	1	0	0	0	0	0	0.552689	0.31908	0.264671	0.100302	0	0	0	0	0	0.520492		0.211344	0.232524	0.698031	0.800555	1	0.351665	0.158831	0.236365	0.410774	0.381207	0.0739122	0	0	0	0.200729	0.170023	0.0448187	0.668797
0.160626	0.824454	1	0.772234	0.897278	0.876316	0.619015	0.321448	0.171481	0.167779	0.184206	0.0298011	0.149133	0.216921	0.216921	0.238613	0	0		0.198459	0.38975	0	0.458336	1	0	0	0	0.247478	0.418817	0	0	0	0	0	0	0.785706	0.82407
0.364932	0.458789	1	0	0	0	0	0.0759294	0.255392	0.655215	0	0.146703	0	0.065688	0.107899	0.228479	0.371724	0.464723		0.253824	0	0.370532	0.878954	1	0.21976	0.747681	0.128721	0.445683	0.527853	0.0645362	0.040144	0.578581	0	0	0	0.344029	0.0626738
0.266183	0.681032	1	0.778907	0.555482	0.386037	0.103952	0.0767648	0.0396605	0.0378073	0.0862248	0.0876937	0.093695	0.204425	0.22291	0.496846	0.195985	0.0135366		0.632329	0.190305	0.482506	0.956155	1	0.860317	0.729323	0.897128	0.583931	0.152485	0.335541	0.327934	0.314208	0.138604	0.0246319	0.0453331	0.0302915	0.511551
0.428843	0.492512	1	0.0328476	0.169395	0	0	0.291268	0.12917	0.375766	0.585571	0.676196	0.0609148	0.843018	0	0.0950911	0.0254212	0.1529		0.051696	0.0261753	0	0.45182	1	1	0.881315	0.594892	0.0483861	0.0975293	0.137662	0.177219	0.230543	0.00927742	0	0.047598	0	0.00917528
0.554028	0.655878	1	0.67499	0.977858	0.545924	0.0533464	0.580954	0.700795	0.1596	0.517432	0.786826	0.264623	0	0.228295	0.856398	0	0.195698		0.344112	0.0552898	0.429278	0.830239	1	0.782628	0.567516	0.398042	0.13302	0.409955	0.0683153	0.703823	0.470036	0.343726	0	0	0.105288	0.0823356
0.0504463	0.185888	1	0.67214	0.448093	0	0.0276891	0.0948865	0.167619	0.41137	0.238782	0.719022	0.173433	0	0	0.045057	0.0446687	0.0507683		0.229689	0.602412	0.653306	0.691616	1	0.922999	0.479203	0.143265	0.505905	0.508285	0.083797	0.0621752	0.0470872	0.0200046	0.137298	0.0789757	0.16444	0.155395
0.235322	0.142884	1	0	0.0403357	0.0361071	0.251698	0.134538	0.0425143	0.0949635	0.180026	0	0.113802	0	0.159798	0.0848441	0.0273901	0.0181994		0.905721	0.32486	0.276855	0.519442	1	0.924769	0.100677	0	0.192459	0.254203	0	0	0.119772	0.0432012	0.2563	0.157407	0.18911	0.236504
0	0.685866	1	0.11975	0.308654	0.216532	0.912014	0.233744	0.316871	0.0644683	0.0464022	0.218541	0.306264	0	0	0.0489905	0.0869634	0.334942		0	0.0946065	0	0.715604	1	0	0	0.173165	0.22811	0	0	0	0	0	0	0	0.0562289	0.105035
0	0	1	0	0	0	0	0.0353686	0	0.166184	0	0	0	0	0	0	0	0		0.0262626	0.232671	0	0.060622	1	0.225882	0.258894	0	0.0542159	0.132082	0.147935	0	0	0	0.0177843	0.193394	0.0254537	0
0.668415	0.0774239	1	0.270653	0.761341	0.299008	0	0.69072	0.350252	0.407403	0.210306	0	0	0	0	0.0106822	0.420724	0.168339		0.501922	0.2125	0.250246	0.150094	1	0.0573457	0.582418	0.0493887	0.604445	0.077967	0.0408639	0.661331	0.813992	0.257347	0.111355	0.0912702	0.659255	0.631974
0	0.424574	1	0	0	0	0	0.648579	0.39011	0.388225	0	0	0	0	0	0	0	0.384896		0.587195	0.0147821	0.419076	0.628614	1	0.123284	0.122268	0	0	0.103514	0	0.226164	0.156304	0.235775	0.438616	0.413147	0.289566	0.948868
0	0	1	0	0	0.151622	0.00444667	0.148696	0.115587	0.127146	0.018799	0.105202	0	0	0.0648232	0.0652672	0.0887885	0.034958		0.192896	0.177751	0	0	1	0.851601	0.400921	0	0.172903	0.284498	0	0.35999	0.173072	0.55065	0.027252	0.198384	0.448454	0.430345
0.83454	0.390307	1	0	0	0	0.0281605	0.157768	0.723133	0.92766	0	0	0.227948	0	0	0.295752	0.121408	0.0985887		0.0471135	0.25146	0.233317	0.74281	1	0.393278	0.293697	0.150643	0.101376	0.239949	0.0989615	0	0	0.00953753	0.769874	0.769874	0.64806	0.0550519
0.0165954	0.401823	1	0.946572	0.946572	0.946572	0.8488	0	0.00492662	0.0469892	0.127531	0	0.177617	0	0	0	0	0		0.0570072	0.0357437	0	0.256944	1	0.979626	0	0	0	0	0	0.591449	0.270061	0.351474	0.491957	0.732518	0.38072	0.358585
0.443117	0	1	0.858884	0.980013	0.959826	0.182303	0.564223	0.275191	0.0194382	0.235478	0.470956	0.0872141	0	0	0	0.147038	0.0205074		0.536946	0.550131	0.719712	0.983768	1	0.481471	0.498986	0	0.878534	0.88109	0.957396	0.51302	0.428269	0.428269	0.0825309	0.0242757	0	0.0100295
0.0979601	0.381366	1	0.458964	0.00815398	0	0.0369305	0.210089	0.103759	0.141019	0.501666	0.477708	0.213677	0	0	0.509391	0.0138879	0.0256395		0.170821	0.162425	0.233265	0.324561	1	1	0.262935	0	0.285354	0.833591	0.779944	0.56405	0.427676	0.502437	0.535625	0.4285	0	0.059007
0.300719	0.753895	1	0.45502	0	0.120137	0.158559	0.0448477	0.25578	0	0.0346123	0.276899	0.102555	0.0471966	0.0707948	0.0194491	0.00173159	0.0378052		0.301637	0.145016	0.861563	0.701033	1	0	0.00218415	0.0143139	0.562889	0.0595861	0	0	0.163426	0.0708178	0	0.0403465	0.177983	0.262347
0.010831	0.0544218	1	0.833333	0	0	0	0.0217598	0.176048	0.176464	0.324557	0.92996	0.324655	0.393243	0.443133	0.0423439	0.0177662	0		0.223494	0.423162	0.0878881	0.517112	1	0	0.08482	0	0.185781	0.0491612	0	0	0.300518	0.0595849	0.683996	0.905509	0.151368	0.0582729
0	0	1	0	0	0	0	0	0.589467	0.446997	0	0	0	0	0	0	0	0		0	0	0.0289719	0.00967978	1	0	0.0643488	0	0.175372	0.0381442	0	0	0	0	0	0.404214	0	0.060037
0.0235297	0.0737026	1	0.398478	0	0	0.543516	0.172906	0.21331	0.779062	0	0	0	0	0	0.89814	0.108414	0.973066		0.867515	0.634393	0.282924	0.791988	1	0.0976387	0	0.0394327	0.815227	0.590892	0.0416136	0	0	0.42045	0.704942	0.704942	0.145536	0.115543
0.300876	0.54543	1	0.869046	0.761845	0.327273	0	0.0678002	0.415329	0.7142	0.906499	0.68234	0.514089	0.653088	0.519063	0.128704	0.318368	0.015829		0.758465	0.94461	0.872374	0.425412	1	0.17701	0.738109	0.742879	0.532803	0.0799191	0.107949	0	0	0	0	0	0.485004	0.246889
0.169426	0.00892857	1	0.2	0	0	0.130281	0.839285	0.305194	0.0149067	0.281961	0.0427359	0	0.122882	0	0.119362	0.285447	0.0938106		0.473069	0.74496	0.485112	0.253374	1	0.0198633	0	0	0.745992	0.0686053	0	0	0	0.282973	0.565945	0.242548	0	0.0753791
0.311877	0.475917	1	0.693196	0.428196	0.32407	0.0854603	0.129382	0.492358	0.753424	0.844768	0.53866	0.361804	0.627702	0.4483	0.0886452	0.293823	0.102799		0.108787	0	0	0.30303	1	0.0206165	0	0	0.29308	0.534946	0	0	0	0	0.493917	0.376318	0	0.327838
0.0872788	0.77253	0.481847	1	0.688486	0.461975	0.780544	0.738886	0.0879014	0.280756	0.432996	0.408553	0.195867	0.0679784	0.00277548	0	0.146041	0.0672428		0.352541	0	0	0.757576	1	0	0.0461518	0	0.541271	0.116769	0	0	0	0	0.0778871	0.356055	0.0662305	0.11325
0.0536088	0.143586	0.197717	1	0.444444	0	0.00982317	0	0.0350541	0.0347552	0.0252271	0	0	0.00301348	0.115527	0.177343	0.190879	0.254588		0.452061	0.033705	0	0.427807	1	0	0	0.36107	0.911718	0.21327	0	0	0	0	0	0	0	0.095483
0.620955	0.0305256	0.297532	1	0.0649804	0.155226	0	0.128272	0.258759	0.144862	0.0929731	0.0970892	0.367917	0.10662	0.0034525	0	0.0974473	0.167609		0.0211784	0.249816	0.194116	0.0770033	1	0.0314092	0.0562462	0.131869	0.83548	0.0838836	0.259592	0.422561	0.214234	0	0.297439	0	0	0.283748
0.129534	0.156326	0.524795	1	0.252428	0.174223	0.0595536	0.14636	0.560321	0.032059	0.452947	0.949802	0.579735	0.0525224	0.0404156	0.0626334	0.421937	0.244496		0.10247	0.80679	0.304407	0.139782	1	0	0.119252	0.104844	0.437381	0.783191	0.1344	0	0	0	0.17083	0.122021	0	0.116599
0.726576	0.515702	0.630546	1	0.184078	0.00930491	0.736427	0.802309	0.124338	0.206667	0.460757	0.838391	0.627049	0.142817	0.110706	0.372037	0.250437	0.373495		0.0222862	0.0365934	0.0995802	0.777991	1	0.922865	0.692142	0.637499	0.567764	0.828426	0.0951562	0	0.104541	0	0.106929	0	0.130706	0.317678
0.127569	0.0823081	0.166517	1	0.658855	0	0.199322	0.0105155	0.107102	0.020994	0.221884	0	0	0.00184878	0.00431721	0	0.0376484	0.391028		0	0.229604	0	0	1	0	0	0	0	0	0	0	0	0	0	0	0	0
0.0944459	0.140215	0.374116	1	0.796535	0.256484	0.427035	0.0328579	0	0.0116783	0.0705172	0.502829	0.106437	0.783596	0.113016	0.0887923	0.140499	0.00655185		0.642897	0.469756	0.127745	0.356836	0.118649	1	0.517881	0.460548	0.312047	0.243769	0.0614619	0.134001	0.0447275	0	0.060608	0.114371	0.0215886	0.326336
0	0	0.0897157	1	0.337878	0.406621	0	0	0.234223	0.528339	0	0	0	0.240817	0.882755	0.0707025	0.624865	0		0.459747	0.25619	0.0228694	0.131398	0.328106	1	0.0634923	0.0790801	0.0386955	0.0918747	0.154258	0.403377	0.393935	0.635557	0.721934	0.480945	0.265601	0.221434
0.528892	0	0	1	0	0	0	0.573519	0	0	0	0	0	0	0	0.814675	0.560036	0.0844363		0.641127	0.699587	0.112163	0.668186	0.44326	1	0.0545165	0.0872233	0.471368	0.30232	0.121755	0.0966848	0.0819448	0.219421	0.39129	0.0532641	0.00710188	0.0444798
0.202672	0.632669	0.507545	1	0.447993	0.300934	0.212089	0.565294	0.317807	0.331259	0.707017	0.543269	0.746889	0.346024	0.295346	0.440987	0.165233	0		0.762363	0.560826	0.591365	0.549237	0.408724	1	0.121423	0.0572717	0.165756	0.489385	0.523388	0.172246	0.0805607	0.211167	0.138854	0.29193	0.886574	0.268157
0.11878	0.103738	0.410686	1	0.804116	0.405452	0.57676	0.264444	0.289482	0.466472	0	0.166514	0.411213	0.210611	0.174607	0.365247	0	0		0.672882	0.223573	0	0.217149	0	1	0	0	0.250031	0.293712	0	0	0	0	0.491038	0.773386	0	0.492996
0.25651	0.150495	0.445895	1	0.0555257	0.00779588	0.156229	0	0.190164	0.0245437	0.239107	0	0	0.0788226	0.0899651	0.524929	0.319533	0.37698		0.0814866	0.755188	0.889843	0.615815	0.864198	1	0.746366	0.666612	0.603706	0.0439878	0.269453	0.282395	0.470659	0	0.114106	0.144225	0.0906163	0.322719
0	0	0	1	0	0	0	0	0.420993	0	0	0	0	0	0.661308	0	0	0		0.551917	0.690896	0.710742	0.608903	0.997901	1	0.86377	0.559549	0.419502	0.336618	0.599075	0	0.330295	0.354244	0.0699972	0.152814	0.144222	0.56511
0.487563	0.204182	0.831099	1	0.806164	0.48679	0.618799	0.243356	0.0587596	0.410659	0.876468	0.356647	0.155292	0.212046	0.345144	0.229341	0.150109	0		0.719849	0.710301	0.553801	0.331741	0.613534	1	0.835507	0.907874	0.438681	0.884279	0.0532546	0.0527133	0.198521	0.150769	0.0668994	0.472348	0.619596	0.748994
0.0280271	0.150513	0.749997	1	0.821295	0.328518	0	0.717177	0.477127	0.331388	0	0	0	0	0	0.166329	0.188295	0.0674282		0.0581799	0.363338	0.497214	0.531105	0.848263	1	0.430804	0.14326	0	0	0	0.0355092	0.44965	0.469837	0.0529894	0	0	0
0.0661556	0.055209	0.489939	1	0.845686	0.120812	0.196128	0.717544	0.557581	0.757763	0.881727	0	0	0.231657	0.360735	0.401539	0.028396	0		0.544352	0.841389	0.775817	0.705032	0.930963	1	0.26974	0.57515	0.219321	0.444866	0.686777	0.401178	0.242105	0.236306	0.311539	0.225627	0.0775442	0.315384
0.19611	0.427231	0.950563	1	0.840783	0.580454	0.493827	0.560737	0.564387	0.338233	0.313515	0.458794	0.437718	0.484252	0.425561	0.481649	0.52874	0.221306		0	0	0.176266	0.742706	0.773196	1	0.949745	0.441397	0.250956	0.468012	0.925814	0.954675	0.181044	0.0461597	0.0773187	0.172677	0.0936389	0.00665114
0.331352	0.323097	0.419675	1	0.692465	0.107277	0.0488241	0.677151	0.482817	0.471788	0.391581	0.455535	0.20993	0.38782	0.173417	0.205843	0.0971854	0.0669891		0.12387	0.0104039	0.0528917	0.468251	0.413082	1	0.761968	0.918792	0.642439	0.29403	0.0921638	0.175121	0.242821	0.203426	0.43955	0.738518	0.293039	0.392106
0.530284	0.0604634	0.879792	1	0	0.00785522	0.0227936	0	0.153732	0.898874	0	0.0925254	0.289913	0	0.40211	0	0.0105034	0.321012		0.454952	0	0	0.0196061	0.622821	1	0.932364	0.649418	0.24229	0.0799917	0	0.215611	0.0555945	0.0471711	0.0405551	0.0976749	0	0.00103561
0	0	0.15829	1	0	0	0	0.169628	0.776867	0.268761	0.222088	0.346458	0	0	0.193479	0	0.693497	0.385443		0.218155	0.233242	0.014667	0.145329	0.459072	1	0.743475	0.178624	0.728188	0.862687	0.983537	0.653492	0.145245	0.393754	0.346066	0.0831195	0.0215353	0.182485
0	0	0.690022	1	0.776979	0.0138321	0.0200683	0.116242	0.121035	0.44317	0.908213	0.0695245	0	0.0846675	0.831208	0.720567	0.886562	0.125377		0.166209	0.236165	0.261384	0.450758	0.60371	1	0.627107	0.133038	0.325301	0	0	0	0.142235	0.080184	0.0189929	0.0862982	0.264217	0.560418
0	0.0119913	0.682728	1	0.548069	0.277923	0.131366	0.623524	0.0233973	0.120929	0	0	0	0.0276673	0.664015	0.470088	0	0.0572808		0.00886252	0.364463	0.371177	0.405943	0.868458	1	0.886763	0.43683	0.874106	0.40814	0.411417	0.615675	0.300979	0.193159	0.188441	0.224648	0.17249	0.0532518
0.311606	0.0344616	0.0145488	1	0.042779	0	0.0797394	0	0.178749	0.0702228	0.111635	0.264824	0.452609	0	0.233968	0	0.144489	0.845026		0.0407403	0	0.238698	0.191165	0.829854	1	0.46829	0.335064	0.35119	0.543386	0.189334	0.0464022	0.177405	0.0108151	0.0940672	0.738593	0.0313462	0.678167
0.0204459	0.419717	0.739747	1	0.0816619	0	0.278414	0.567448	0.521647	0.96656	0.0137293	0.323772	0.510933	0.244447	0.562248	0	0.0723245	0.069846		0.0441039	0.180547	0.559043	0.863865	0.821547	1	0.44588	0.0242835	0.00138033	0.0894633	0.0298629	0.103472	0.276061	0.194544	0.0962802	0.210788	0.0581992	0.0338034
0	0.540675	0	1	0.879121	0.33532	0	0	0	0	0	0	0	0	0	0.512419	0	0		0.0840011	0.649108	0.602992	0.622241	0.835265	1	0.690645	0.296376	0.122922	0.0682792	0.0432519	0.391251	0.435594	0.186674	0.0915156	0.182023	0.0388885	0.0841558
0	0.0290773	0.00576345	1	0.23155	0.169777	0.0523022	0.0605097	0.22999	0.125919	0	0	0	0	0.154225	0	0.140217	0.404065		0.0938333	0.217921	0.716928	0.790468	0.7823	1	0.934431	0.131778	0.103739	0.209403	0.468225	0.417999	0.182198	0.214291	0.0498212	0.13922	0.146526	0.0565358
0.0528254	0.0697127	0	1	0.79416	0.324548	0	0.0682835	0.113806	0.242052	0.549421	0	0.065724	0	0	0.140511	0.203344	0.0260497		0.0705947	0	0.0124223	0.337167	0.974751	1	0.532099	0.125206	0.180101	0.0675662	0.635898	0.467849	0.133484	0.0188721	0	0.0189048	0	0.00690953
0	0	0	1	0	0	0	0	0	0	0	0	0	0	0	0	0	0		0.155864	0	0	0	0	1	0	0	0	0.0944624	0	0	0	0	0	0	0	0.0693978
0.0635888	0.285357	0.196096	1	0.300826	0.102687	0	0.745397	0.248638	0	0	0	0	0.164913	0.172912	0.137688	0.487118	0.52261		0.0713043	0.482292	0.818959	0.664694	0.877776	1	0.723994	0.486445	0.0798283	0.153661	0.250135	0.434361	0.525983	0.753717	0.271348	0.140076	0.146805	0.0174295
0.0267278	0.220203	0.436865	1	0.155624	0.455294	0.219541	0.348762	0.375904	0.0537022	0	0	0	0	0.0291621	0.19085	0.420939	0.761862		0.24367	0.0591875	0.787994	0.622294	0.707147	1	0.452653	0.305986	0.543216	0.0652179	0.1321	0.341032	0.743283	0.753131	0.255448	0.135311	0.119893	0.474204
0.0142232	0.540699	0.412263	1	0.21462	0	0	0.635144	0.681743	0.762173	0	0	0	0.299285	0	0	0	0		0.0154526	0.20086	0.127615	0.369526	0.828441	1	0.42676	0.124406	0.140531	0.485631	0.422116	0.654597	0.44155	0.302551	0.136215	0.19632	0.183847	0.0606187
0.139266	0.402423	0.293549	1	0.812567	0.151746	0.260907	0.305015	0.0780272	0.121021	0.0845068	0.0525517	0.0862367	0.101795	0.260189	0.248767	0.137052	0.260596		0	0.321531	0.408999	0.787137	0.508759	1	0.378647	0	0.0843291	0.167083	0	0	0	0.243135	0	0	0.220808	0.194637
0.112291	0.160849	0.0162071	1	0.801332	0.492305	0.302384	0.0761278	0.496214	0.375038	0.435039	0.0860885	0.731753	0.755358	0.377679	0	0.282666	0.254177		0.0901534	0.32139	0.140782	0.31719	0.608895	1	0.610638	0.657468	0.481296	0.121896	0.0542624	0.379837	0.452935	0.493806	0.422659	0.67248	0.597194	0.133127
0.573613	0.322674	0	1	0.539855	0	0	0	0	0.355353	0.0331464	0	0	0	0	0	0.0777594	0.355939		0.402055	0.600322	0.789186	0.271086	0.869148	1	0.408052	0.0316915	0.191963	0.459153	0.54061	0.108122	0.0251863	0	0	0.371506	0.419895	0.0708454
0.163661	0.243822	0.328726	1	0.596754	0.622724	0.0738031	0.571036	0.248015	0.0300668	0.0480632	0.192277	0.131036	0.793742	0.54189	0.24427	0.285751	0.534274		0.273347	0.0488046	0.337279	0.72275	0.956239	1	0.675493	0.0476708	0.298559	0.641119	0.8188	0.704836	0.727521	0.957447	0.241988	0.313539	0.341618	0.144767
0.0139198	0.0843872	0.156256	1	0.363513	0.151468	0	0.596799	0.341131	0.0719702	0	0	0.264174	0.301968	0	0	0.509957	0.360126		0	0	0	0.0303019	0.454545	1	0.672269	0	0.215254	0.21212	0	0	0	0	0	0	0	0
0.0568931	0.782737	0.667099	1	0.69003	0.507648	0.435838	0.386408	0.580197	0.802408	0.614846	0.387188	0.165841	0.451089	0.288141	0.0302962	0	0.0175505		0.00588816	0.269138	0.0731649	0	0.334157	1	0.18863	0.11172	0.441668	0.0369638	0.342133	0.131966	0	0	0.386267	0.440481	0	0
0.0935736	0.144478	0.615414	1	0.88938	0.822647	0.419403	0.273717	0.267457	0.20868	0.502541	0.545061	0.553753	0.928835	0.814319	0.636107	0.267834	0.111538		0.0840799	0.11428	0.17953	0.245105	0.654653	1	0.448929	0.358106	0.516086	0.217143	0.539318	0.555745	0.48413	0.264801	0.356466	0.105377	0	0.00853714
0.245057	0.65887	0.220551	1	0.727273	0	0	0.401996	0.104152	0.355576	0	0	0.385347	0	0	0.958954	0	0.375227		0.055113	0.456034	0.306827	0.900849	0.846316	1	0.711419	0.755302	0.667734	0.233266	0.841221	0.625011	0.469739	0.406327	0.232588	0.0107152	0.143436	0.0158122
0.494973	0	0	1	0.10463	0	0	0	0	0	0	0	0	0	0	0	0	0.622653		0	0.0602443	0.640795	0.632143	0.961641	1	0.642456	0.591736	0.327497	0.973476	0.384255	0.222319	0	0.172163	0.559631	0.366549	0	0
0.454693	0.668762	0.860355	1	0.264095	0.267868	0.346838	0.304933	0.17023	0.596726	0.937289	0.0760997	0	0.0558571	0.654977	0.922974	0.991286	0.333982		0.0392581	0.0819579	0.120114	0.30806	0.464582	1	0.76043	0.503805	0.444173	0.273953	0.0313965	0.0350896	0.0275816	0	0.0219588	0.173192	0.0532344	0.0344792
0.0651296	0.561645	0.80994	1	0.883746	0.717855	0.499548	0.309773	0.122865	0.0717309	0.148652	0.219743	0.400168	0.388362	0.336084	0.311678	0.172929	0.00128497		0.0498825	0.011677	0	0	0	1	0	0	0.608222	0	0.305929	0	0.300393	0	0	0	0	0.0194268
0.272902	0.127897	0.701487	1	0	0	0	0	0.550402	0.469676	0	0	0	0	0.357143	0	0.715613	0		0.728945	0	0	0.132322	0.895503	1	0.229248	0	0.940124	0.561216	0	0	0	0	0	0.134015	0	0.168099
0.251667	0	0.219885	1	0	0	0.120822	0.0831929	0.249708	0.618413	0.586298	0.942265	0	0	0	0	0	0.535243		0.590265	0.570032	0.236004	0.0965135	0.594226	0.459476	1	0.0483327	0.206652	0	0.864363	0	0	0	0	0.692943	0.200314	0.569584
0.0514186	0.421338	0.270399	1	0.675648	0.932181	0.45193	0.233452	0.138352	0.296098	0.543143	0.0523035	0.0276068	0.266949	0.636277	0.10744	0.0133852	0.254517		0.658421	0.340262	0.593526	0.251091	0.717085	0.930731	1	0.788117	0.76696	0.285353	0.38505	0.150293	0.282648	0.703477	0.813922	0.61299	0.287272	0.189621
0.0288745	0.0309291	0.589963	1	0.987301	0.985751	0.212796	0.0510176	0.0518481	0.139983	0.0121971	0.0975772	0.0722794	0.23285	0.362211	0.0891553	0.19636	0.230165		0.627682	0.0403885	0.205566	0.779228	0.146728	0	1	0.867057	0.853777	0.816157	0	0.271208	0.347146	0.327727	0.819317	0.327727	0	0.0455579
0.00408039	0.197272	0.09642	1	0.958505	0.821221	0.987052	0.380531	0.248698	0.254581	0.710815	0.0931326	0	0.419285	0.0381168	0	0.259811	0.358092		0.108019	0.236765	0.285779	0.233723	0.0188413	0.702503	1	0.0170214	0.565147	0.112578	0.11597	0.622435	0.0104713	0.172524	0	0	0	0.0112349
0.00921494	0	0.166667	1	0.5	0	0.0148976	0.176857	0.254311	0.0590771	0	0	0	0	0	0	0.0584096	0.00503209		0.0307358	0.146901	0	0.0555731	0.0045677	0.427899	1	0.381679	0.0199922	0.131342	0.0193227	0.322901	0.445996	0.445996	0.0374908	0	0.00683108	0.159277
0	0.69815	0.899773	1	0.48067	0.375428	0.437749	0.360442	0.116677	0.0789739	0.302993	0.567924	0.523538	0.164222	0.0309621	0.0505162	0.00308513	0		0.568169	0.546106	0	0.257244	0.491524	0.0735073	1	0.598054	0.213916	0.335624	0.646788	0.114072	0.152466	0.905405	0.968597	0.235701	0.490434	0.3543
0.0218297	0.468673	0.838876	1	0.940438	0.236665	0.0205862	0.292467	0.312216	0.262616	0.0650254	0.137225	0.177571	0	0	0	0.017582	0		0.127184	0	0.0305808	0.846832	0	0	1	0.579513	0.480249	0.161173	0	0	0	0	0	0	0	0.167748
0	0	0	1	0.747183	0.309598	0.317536	0.0315112	0.00658788	0.0131752	0	0	0	0	0	0	0	0		0.126418	0.0350511	0.0268157	0.0674598	0.101424	0.250108	1	0.147754	0.375503	0.37638	0.0457268	0	0.355504	0	0	0	0.360563	0.0422303
0.0176529	0	0.428571	1	1	1	0.312405	0.118072	0.0708057	0	0	0	0.159325	0.35848	0.17924	0	0.0147942	0.0318651		0.0449434	0.143213	0.280805	0.915316	0.723283	0.664727	1	0.825075	0.470363	0.293193	0.727139	0.667396	0.451487	0.275435	0.121003	0.293369	0.205049	0.0399415
0.0346562	0.302511	0	1	0	0	0	0.176151	0.327696	0.238202	0	0	0	0	0	0	0	0.0390161		0.1491	0.0810609	0.0119777	0.0844368	0	0	1	0.547108	0.0266663	0.0224111	0.0555798	0.0530505	0.0866948	0.110504	0.108554	0.0062714	0.0266339	0.108944
0.106941	0.375517	0.489211	1	0.798618	0.8562	0.787447	0.790473	0.370666	0.690464	0.682191	0.926513	0.747896	0.31134	0.185145	0.214749	0.146833	0.039252		0.532016	0.696665	0.359439	0.219668	0.0651675	0.32141	1	0.982593	0.768947	0.514497	0.117031	0.236218	0.122422	0.482412	0.539653	0.198881	0.139079	0.238303
0.100674	0.423834	0.904052	1	0.832333	0.458419	0.510037	0.257567	0.0591662	0.325387	0.0678693	0	0.145702	0.499212	0.551076	0.50386	0.408329	0.470127		0.330142	0.866907	0.86234	0.968351	0.84174	0.81438	1	0.816109	0.382674	0.176076	0.298167	0.574286	0.460972	0.408577	0.310356	0.377355	0.199615	0.0573605
0.523145	0.274261	0.391229	1	0.375959	0	0.0175032	0.563786	0.361271	0.245649	0.392004	0.0874723	0.464009	0.384818	0.92941	0.354194	0.130258	0.183527		0.503648	0.309581	0.0895966	0.0683554	0.0654716	0.178679	1	0.806494	0.774907	0.695193	0.18629	0.346093	0.325528	0.439508	0.293125	0.155335	0.506066	0.565892
0	0.12738	0.860853	1	0.820441	0.499427	0.181345	0.0633824	0.156416	0.125134	0.144573	0.0629676	0.441103	0.473014	0.187183	0.00659758	0	0.165012		0.0923382	0.214657	0.241447	0.102073	0.225697	0.5751	1	0.542174	0.147838	0.119581	0.132752	0.0659358	0.198656	0.234137	0.0400775	0.0239577	0.122724	0.0609178
0.222078	0.400927	0.365337	0.539415	1	0	0	0	0.193296	0.453333	0.631579	0	0	0.173466	0	0.291309	0	0.107096		0.739873	0	0	0	0.398697	0.797394	1	0.754291	0.621517	0.223263	0	0.104959	0	0	0	0	0.414238	0.257822
0.107206	0.0486859	0.0366048	0.47651	1	0	0	0.810058	0.263657	0.0579369	0	0	0	0.0828734	0.0293889	0	0	0		0.362481	0.240438	0.0655157	0.0246428	0	0.324655	1	0.409537	0.199909	0.0180169	0	0.0629993	0.0235374	0.0642027	0	0.0159951	0.210308	0.3598
0.0246959	0.0013842	0.0428654	0	1	0.351351	0.0807888	0	0.0319602	0.0312822	0.131864	0	0.105062	0.0420443	0	0.0216699	0.0749353	0.0370271		0.0274423	0.211316	0.555267	0.769334	0.763891	0.794826	1	0.705139	0.0651753	0.0487976	0.237177	0.371924	0.365437	0.146007	0.0598024	0.0300811	0.0431504	0.0407332
0.139411	0.269217	0.0315833	0.506494	1	0	0.0729629	0.183965	0.0434535	0.0746336	0	0.299127	0	0.0716766	0	0.0246224	0	0		0.126017	0.043148	0.253502	0	0.32338	0.500535	1	0.738105	0.733198	0.81264	0.710958	0.53539	0.731578	0.476767	0	0.026197	0.0191972	0.3282
0.0175408	0.198299	0.0869124	0.117312	1	0.697773	0.736561	0.0237346	0.186271	0.453121	0.105031	0	0	0.130015	0.346829	0.00225645	0.0387067	0		0.0558304	0.290314	0.491502	0.680699	0.404155	0.836454	1	0.704402	0.434662	0.143242	0.0528626	0.397655	0.563346	0.137752	0.0857888	0.154532	0.166588	0.0100983
0	0.0104149	0	0.439988	1	0.193051	0.226018	0.36106	0.050814	0.857901	0	0	0.3495	0.280704	0	0.0523199	0.729586	0.341896		0.663743	0.155381	0.109304	0.311804	0	0.597467	1	0.235523	0.110175	0.1165	0.130137	0.0667566	0.0709289	0.297104	0.0684357	0.0843063	0.34939	0.530298
0.446917	0.570766	0.160348	0.718951	1	0.713027	0	0.496805	0.0875693	0.339955	0.371041	0.687505	0.725855	0.558852	0.590523	0.227597	0	0.0768455		0	0.143675	0.457147	0	0	0.781893	1	0.100351	0.329279	0	0	0	0	0	0.334755	0.142383	0.0990774	0.0824241
0.0344599	0.0560548	0.454072	0.583598	1	0.204862	0.261338	0.0529438	0.520887	0.909915	0.284404	0.0592697	0.0306108	0.325874	0.249883	0.435775	0.248693	0.169129		0.20277	0.0437402	0.936555	0	0	0.162469	1	0	0	0.0637745	0.601143	0	0	0	0	0.0146102	0.0687276	0.174437
0.18008	0.319873	0.0873537	0.366895	1	0.995979	0.725876	0.904575	0.953961	0.819842	0.247864	0	0.0357003	0.249902	0.441576	0.0821066	0.132089	0.0996831		0	0.100896	0.279224	0.0459627	0.173515	0.678385	1	0.16851	0.0522494	0.177557	0.194804	0.0732158	0.399263	0.277254	0.254868	0	0.0671474	0.159358
0	0.0509664	0.106282	0.856313	1	0.255774	0	0.0679601	0	0.022982	0.0288279	0	0.27123	0.0715332	0.874387	0.925771	0.402608	0.0388052		0	0.0812822	0.480458	0.37373	0.450971	0.833163	1	0.0978859	0	0	0	0	0	0.298412	0	0	0.159677	0.0241428
0.00683837	0.276193	0.626721	0.337252	1	0.690631	0.749173	0.687627	0.46916	0.196694	0	0.0477885	0	0	0	0.152995	0.854538	0.272574		0.63458	0.0262987	0	0.309158	0.583969	0.61787	1	0.828532	0.340608	0.128373	0.0727247	0.00464236	0.126386	0.097217	0.0953	0.0560588	0.156281	0.255213
0.390723	0.23514	0.35324	0.617356	1	0.705219	0.501217	0.474752	0.60729	0.147384	0.388938	0.468096	0.172387	0.44022	0.253617	0.437058	0.466193	0.627658		0.0230874	0.425175	0.665413	0.743379	0.279577	0.232892	1	0.961564	0.686093	0.184453	0.0119478	0.0987093	0.120038	0.0181704	0.129403	0.463381	0.330509	0.0560351
0.577574	0.0742051	0.214212	0.548585	1	0.845009	0.646776	0.287913	0.16129	0.448891	0.365694	0	0.167266	0	0.382295	0.312377	0	0.0298825		0.488465	0.0724292	0.21879	0	0.37416	0.672737	1	0.0149104	0	0.350229	0.887227	0.638898	0.365085	0	0	0.106444	0	0.156763
0.507714	0.411296	0.290221	0.609406	1	0.853252	0.430753	0.116031	0.0683061	0.32573	0.0387437	0	0.0885468	0.209971	0.101941	0.0821736	0	0.067693		0.00626021	0.516564	0.0339433	0.142793	0.332058	0.818328	1	0.704334	0.160907	0.228809	0.117673	0.258715	0.435337	0.245352	0	0	0.421307	0.366347
0.0406843	0.758388	0.420307	0.701281	1	0.887067	0.640265	0.457236	0.16165	0.202407	0.145779	0.580564	0.336504	0.106222	0	0	0	0		0.0974906	0.0279499	0	0	0.136185	0.573209	1	0.352941	0	0	0	0	0	0	0	0	0.0721749	0.852641
0.880391	0.0769293	0.108874	0.0724886	1	0.174078	0	0.350213	0.584557	0.369609	0	0	0	0	0.157666	0.153006	0.259105	0.599021		0.170086	0.0488716	0	0	0	0.0345719	1	0.914658	0.735984	0.0293515	0	0	0	0	0.0511762	0.223181	0.157411	0.0300334
0	0	0	0.454071	1	0	0	0.527692	0	0.547146	0	0	0	0	0	0	0.0620205	0.336947		0.44539	0.356989	0.318599	0.158284	0.00319811	0.524912	1	0.760141	0.794655	0.760141	0.760141	0.348118	0	0	0	0.194162	0.35995	0.743059
0.281265	0.0598743	0.174556	0.999583	1	0.563132	0	0.275481	0.267086	0.582089	0.125069	0.0425367	0	0	0	0.00798447	0.339268	0.280842		0.0737837	0.132963	0	0	0.853086	0.147302	1	0	0.802592	0.418744	0	0	0	0	0	0	0	0
0.0779615	0.276859	0.716713	0.914188	1	0.804561	0.710777	0.389373	0.679418	0.363023	0.579116	0.559466	0.524673	0.331037	0.215363	0.0221884	0	0.000147492		0.721351	0.955506	0.598984	0.86904	0.208488	0.28216	1	0.331682	0.026795	0.822129	0.779586	0.0122341	0	0.0982032	0	0.0703353	0.0141975	0.0876424
0.32112	0.0126106	0.247126	0.026146	1	0.881174	0.579772	0.535174	0.629895	0.190966	0.50503	0.410967	0.192574	0.308356	0.196095	0	0.379813	0.773066		0.158567	0	0.0448871	0.435231	0	0	1	0	0	0	0.15042	0	0	0	0	0	0	0.268221
0.887748	0	0.0612067	0.557993	1	0	0	0	0.344018	0.40427	0.413309	0	0	0.179737	0	0	0	0.37726		0.208506	0.5286	0.129897	0.360942	0.300044	0.650394	1	0.124725	0.099367	0.0267306	0.138513	0.755198	0.102922	0.904448	0	0.3514	0.0880365	0.0554947
0.205729	0.93239	0.96172	0.911676	1	0.71888	0.562106	0.249693	0.0239473	0.0308353	0.23962	0.296998	0.24581	0.273149	0.230118	0.201711	0.121884	0.0262551		0.335553	0.461508	0	0	0	0.602566	1	0.850267	0.575538	0.182822	0.0550318	0	0	0	0	0.00767574	0.442632	0.540297
0.00181876	0.103594	0.449896	0.606134	1	0.232231	0.630444	0.673986	0.178188	0.245167	0.445816	0.283448	0.174757	0	0.0300224	0.0844453	0.00989228	0.119223		0.230638	0.0346851	0.113054	0.534705	0.350096	0.342224	1	0.505351	0.421827	0.831711	0.921713	0.057702	0.0197976	0	0.216496	0.480718	0.255146	0.604527
0.286133	0	0	0.333333	1	0	0	0	0.499656	0.208095	0	0	0	0	0	0	0	0.233426		0	0	0	0.0612147	0	0.0664137	1	0.293786	0.646688	0.122581	0	0	0	0	0	0	0	0
0.0344094	0.166181	0.61416	0.784617	1	0.721528	0.802032	0.629173	0.574273	0.468661	0.638957	0.787494	0.704452	0.460228	0.350987	0.131979	0.0731257	0.0193534		0.24448	0.405675	0.812834	0.532256	0.39711	0.399534	0.531422	1	0.709971	0.395385	0.47562	0.157661	0.0897146	0.12885	0.107232	0.302951	0.109064	0.206296
0.057679	0.328807	0	0.269717	1	0	0	0	0	0	0	0	0	0	0	0	0	0.270937		0.167019	0.0389329	0.0239411	0.25787	0.155199	0.358969	0.15792	1	0.676584	0.226795	0.126623	0.222202	0.135404	0	0	0	0.485509	0.0751173
0	0.0342548	0	0.572727	1	0	0	0	0.129106	0.0860213	0	0	0	0.028198	0.366575	0.157103	0.0327153	0.00501702		0.313954	0.721654	0.77229	0.027196	0.103118	0	0.167814	1	0.644916	0.24469	0.262801	0	0.0566955	0.282193	0.0267634	0.0347924	0.00463899	0.0485832
0.206747	0.156839	0.194623	0.117307	1	0.629983	0.931252	0.880256	0.805247	0.229273	0	0	0	0	0	0	0.815157	0.041622		0.183933	0.188175	0.451819	0.48886	0.127943	0.181452	0.577808	1	0.448315	0.119799	0	0	0.0185376	0.0240989	0.172536	0.20797	0.0603829	0.039792
0.00585902	0	0	0.0524206	1	0.947579	0.433694	0.333216	0.67407	0.821044	0	0	0	0	0	0	0.0345013	0.0152861		0.447642	0.905363	0	0	0	0	0.4	1	0.729787	0.796947	0.0244275	0.0135708	0.0563712	0.0732826	0.0281856	0	0	0
0.313886	0	0.0352192	0.463249	1	0.950457	0.843312	0.646248	0.245113	0.0491618	0	0	0	0	0	0	0	0.00779054		0.314031	0.293314	0.459344	0.402906	0.209175	0.152947	0.39613	1	0.770235	0.441928	0.61754	0.464952	0.0721339	0.107757	0.132879	0.200925	0.103366	0.284054
0.0110688	0.0417357	0	0.984475	1	0.818453	0.849157	0.47668	0.0158539	0.0801772	0.132576	0.0115	0	0	0	0.0762764	0.106573	0.264026		0.140416	0.259791	0.196188	0.395294	0.466899	0.31177	0.557192	1	0.768995	0.73184	0.120634	0.0269054	0.139149	0.180084	0.0905609	0.224696	0.191912	0.3736
0.312254	0.105039	0.135475	0.752557	1	0.709715	0.766661	0.339527	0.268428	0.337363	0.349356	0.118401	0.551295	0.431231	0.626968	0.28614	0.00256414	0.300463		0.161746	0.0417038	0.0120608	0	0	0.0758959	0.22805	1	0.791476	0.706783	0.0610477	0	0.121474	0	0	0.0210591	0.159734	0
0.556672	0	0	0.50424	1	0.891743	0.766379	0.75774	0.409931	0.439045	0.10025	0.362325	0.399783	0.33886	0.56551	0.666071	0.512572	0.583827		0.128401	0.0895917	0.33855	0.539238	0.534615	0.237884	0.829659	1	0.935038	0.265874	0.215292	0.189725	0.272369	0.210782	0.0748631	0.030562	0.10807	0.0864507
0.21538	0.0359596	0	0	0.711538	1	0.94949	0.0702655	0.0911516	0.0681038	0	0	0	0	0	0	0.100641	0.0908711		0.034887	0.255095	0.0672154	0.0789632	0.437174	0.31814	0.33009	1	0.938932	0.741462	0.531732	0.772761	0.0531216	0.204037	0	0.0634281	0.998652	0.476938
0	0.132296	0	0	0	1	0	0.102489	0.237701	0.0662858	0.738891	0	0	0.00926651	0	0	0	0		0.712268	0.34893	0.795052	0.883242	0.123025	0	0	1	0.98387	0.118214	0.470817	0.0627756	0	0.464139	0.0421945	0	0.190107	0.567
0.468991	0	0.152713	0	0.857143	1	0	0	0.264455	0.0561781	0	0.160268	0	0.0502171	0.28938	0.19219	0	0.329197		0.306606	0.0154297	0.210184	0	0	0.159121	0.33571	1	0.431639	0.341498	0.131568	0.0341101	0	0	0	0.431868	0.27605	0.984302
0	0.02988	0	0	0	1	0.777152	0.00448059	0.1428	0.00429222	0	0	0	0.0859355	0.0764573	0.0159683	0.00360796	0.24673		0.367816	0.075521	0	0.0506885	0.010872	0	0.148878	1	0.231837	0.00710015	0	0	0.13447	0.0977966	0.216381	0.195189	0.032168	0.0849948
0.262052	0.0620811	0.043375	0	0.251634	1	0	0	0.0380945	0.0935441	0.252646	0.796829	0.259152	0.0173448	0.101809	0.0223915	0.0450826	0.0086044		0.316509	0.0765133	0.25041	0.372486	0.374343	0.451571	0.432009	1	0.547377	0.0932284	0.875922	0.741112	0.60828	0.121322	0.0225895	0.376217	0.254258	0.460399
0.0230917	0.0111178	0	0.798069	0.798069	1	0.532046	0.020298	0.0286497	0.00147046	0	0.273495	0.210428	0.0457038	0.00252306	0	0.0100307	0.02789		0.43411	0	0.18278	0.00972342	0	0	0.156319	1	0.959277	0.367559	0	0	0	0.00723116	0	0.170078	0.0614049	0.256818
0.0801831	0.385797	0.580075	0.480502	0.110992	1	0.919644	0.121218	0	0	0	0	0	0.0772725	0.0416782	0	0.303246	0.0316044		0.421626	0.127566	0.165002	0.216928	0.28437	0.362235	0.455775	1	0.389875	0.494951	0.227931	0.242295	0.0462844	0.00127224	0.203195	0.858994	0.54659	0.400966
0.487887	0.0709155	0.377668	0.825179	0.444327	1	0.162396	0	0.766429	0.169505	0	0	0	0.328821	0	0.176818	0.224677	0.963063		0.489133	0.466277	0.502729	0.250896	0.731893	0.63873	0.787254	1	0.752754	0.235341	0.640381	0.730752	0.230752	0.392405	0.27623	0.202313	0.230451	0.748937
0	0.00410334	0	0	0.0559028	1	0.158391	0	0.0162926	0.0409653	0	0	0	0	0	0	0.0043163	0		0.611635	0.764152	0.310462	0.395925	0.234286	0.224348	0.00834113	1	0.365535	0.280443	0.457109	0.0639322	0	0.13475	0.269616	0.0951981	0	0.465663
0.231037	0.0665574	0	0	0.176471	1	0.255968	0.0223682	0.0515835	0.00942721	0	0	0.585597	0.952271	0.175247	0.308892	0.238018	0.0146946		0	0.467656	0.62078	0.960359	0	0.0973245	0.41377	1	0.176917	0	0.101242	0.299307	0	0	0	0	0.190142	0.3656
0.635244	0.428723	0.102969	0	0	1	0.904031	0.13659	0.886083	0.474433	0.0309448	0.118631	0.014422	0.0247651	0.0584189	0.0599977	0	0		0.302965	0	0	0	0	0	0	1	0.602901	0.996747	0	0	0	0.402019	0.0182429	0.777818	0.380602	0.334643
0.0993051	0.157326	0.461489	0.0480717	0	1	0.0989646	0.0125461	0.00357321	0.161228	0.50479	0.326705	0.0008223	0	0.214954	0.171517	0.127696	0.257155		0.174178	0.275283	0.485742	0.0527502	0	0	0	1	0.909971	0.11757	0	0	0.724402	0.784619	0.0753718	0.720742	0.300309	0.434473
0	0.258524	0.00649774	0.0455113	0.156119	1	0.168284	0.167878	0.0298576	0.0217964	0.124592	0.111456	0.233139	0.331496	0.238161	0.805829	0	0.0417813		0.518771	0.655979	0.335792	0.434504	0	0.0505405	0	1	0	0.117458	0.384903	0	0	0.0492701	0.0867745	0.0577138	0.0084013	0.422656
0.144293	0.161596	0.267159	0.0786789	0.286004	1	0.805855	0.685209	0.228287	0.206973	0.169492	0.278061	0.360209	0.302054	0.0671231	0	0.0710234	0.193842		0.177773	0.718877	0.302137	0.0234381	0	0.221865	0.655806	1	0.64722	0.311533	0.153063	0.480004	0.695458	0.180372	0.311592	0.185627	0.264049	0.504603
0.404332	0.348413	0.639507	0.169912	0.847816	1	0	0	0	0.141123	0.150881	0.490558	0.0646382	0.731881	0.671281	0.509134	0	0.193397		0.357851	0.729323	0.256062	0.00673847	0.0141923	0.123544	0.74507	1	0.785336	0.605907	0.546098	0.546098	0.312056	0.0625889	0.16886	0.084393	0.105497	0.0181747
0.0862647	0.390618	0.120754	0.0979946	0.269767	1	0.805131	0	0.00575742	0.136462	0.658869	0.231623	0.196652	0.0285438	0.0669039	0.197094	0.100605	0.0435479		0.193031	0.628772	0	0	0.0596005	0.0368856	0.279979	1	0.257857	0.229171	0.392864	0	0.539919	0.859173	0.748459	0.516657	0.0135696	0.144896
0.126098	0.136883	0.128592	0.25775	0.776592	1	0.727554	0.496609	0.18344	0.0900654	0.0418705	0.0134877	0.174721	0.15101	0.0138196	0.0666766	0.0518402	0.0625585		0.360343	0	0	0	0	0	0.272727	1	0.857325	0.773189	0.751383	0.544817	0	0	0.249587	0	0.932099	0.36988
0.293607	0.65351	0.146426	0.271667	0.687581	1	0.837312	0.54144	0.375178	0.0366095	0	0	0	0	0.171066	0.295905	0.167825	0		0	0	0.217576	0.257584	0.0250965	0.171283	0.0735307	1	0.375	0	0	0	0.0725579	0	0	0.855644	0.191887	0.223039
0.455247	0.973788	0.205689	0.292453	0.520772	1	0.764475	0.427546	0.203986	0.329199	0.098724	0.0103366	0.338317	0.285153	0.0371242	0	0	0		0.193153	0	0	0	0	0	0.343497	1	0.908601	0.73434	0	0	0	0	0	0	0.231525	0.0751046
0.177876	0.130978	0.0738424	0.014527	0.158862	1	0.798461	0.875413	0.389502	0.478996	0.150195	0.0927586	0.102034	0	0	0	0.211604	0		0.024282	0.32256	0	0	0	0.0736572	0.415946	1	0.892824	0.0981189	0.0195995	0.258449	0.0155056	0.734354	0.0454249	0	0	0.259467
0.307583	0.784462	0.972812	0.280011	0.818356	1	0.264791	0	0.0371933	0.0298461	0	0.0555508	0.175623	0	0	0	0.0647329	0.361065		0.548163	0	0	0	0	0	0	1	0.900868	0.276095	0	0	0	0	0	0	0	0
0.0417715	0	0	0	0	1	1	0.923077	0.612172	0.0365016	0.151913	0	0	0	0	0	0	0		0.55765	0.307509	0.376258	0	0.0391651	0.425434	0.334204	1	0.134561	0	0.0526323	0.214183	0.109808	0	0.838514	0.444298	0	0
0.167786	0.010637	0.342367	0.671269	0.890736	1	0.772989	0.42309	0.182407	0.266097	0.4187	0.425538	0.316671	0.0782217	0.579389	0.649439	0.659881	0.264264		0.0842925	0.10237	0.0697046	0.0555191	0.315888	0.353866	0.750718	1	0.352215	0.546404	0.461479	0.561208	0.219375	0	0.107756	0.171756	0.0437634	0.0538559
0.323875	0.0617574	0.0570296	0.449007	0.420425	1	0.43944	0	0.0900923	0.351943	0.954854	0.458869	0.0573358	0.177685	0.248984	0.692958	0.193189	0.156369		0.0567276	0.227409	0.13572	0	0.62151	0.124604	0.731632	1	0.913693	0.06606	0	0	0	0.0864027	0.536372	0.314192	0	0.0364377
0.0667251	0	0.0434946	0.0118622	0.277749	1	0.8082	0.498629	0.385415	0.948974	0.573981	0.13402	0.266766	0.374492	0.374492	0.411942	0.20824	0.181177		0	0.150739	0.0193517	0	0	0	0.825509	1	0.836371	0	0	0.0523891	0.0638045	0.139043	0.315164	0	0	0
0.000744077	0	0.653422	0.91479	0.91479	1	0.0473475	0.0244965	0.0105729	0.00387937	0	0	0.260027	0.351037	0.234024	0	0.0150389	0.0496285		0	0.0192238	0	0	0	0.8353	0	1	0.833333	0	0	0.214793	0.335662	0	0	0	0	0
0.0554047	0	0.128671	0.0748251	0.0107992	1	0.699107	0.620463	0.649998	0.251319	0.0915669	0.0872066	0.114573	0.272521	0.3392	0.718841	0.00980317	0.234162		0.0635842	0.219685	0.296028	0.103868	0.129143	0.0789774	0.209839	0.336129	1	0.375543	0.0863197	0	0.00439183	0	0.0139879	0.253454	0.0554697	0.189988
0.254968	0.235444	0.725174	0	0.085374	1	0.0103521	0.404406	0.863688	0.508018	0	0	0.11814	0.543898	0	0	0	0.0616847		0.634233	0.5364	0.318624	0.310191	0.0215596	0	0.129661	0.846378	1	0.456901	0.215234	0.237831	0.110182	0.30574	0.25273	0.262669	0.00574268	0.228974
0.184235	0.417234	0.257142	0.395753	0.0669637	1	0.21369	0.0390041	0.123831	0.0577997	0.0735449	0	0	0.264526	0.519208	0.213143	0	0.0685651		0.0301927	0.251944	0.0524365	0	0	0	0	0	1	0.241607	0	0	0.0330713	0	0	0	0	0.0135346
0.184118	0	0	0	0	1	0.285262	0.304421	0.177274	0.747393	0	0	0	0	0	0.934853	0.0163666	0.292582		0.419987	0.176189	0.12671	0.191495	0	0	0	0.595853	1	0.60494	0.142531	0	0.0771684	0	0	0	0	0.172662
0.495382	0.521508	0.310364	0.0117918	0.294983	1	0.0131197	0.960795	0.329453	0.209903	0.104119	0.256597	0.235985	0	0.339465	0	0.117528	0.184166		0.523595	0.0999944	0.02503	0.173185	0.0276575	0.259763	0.245664	0.98643	1	0.637181	0.226896	0	0	0	0.0235447	0.162874	0.0570058	0.164347
0.0151498	0	0	0	0	1	0	0.106629	0.330309	0.331454	0.0855384	0.810239	0	0	0	0	0	0.106854		0.0897713	0	0	0	0	0	0.161534	0.45323	1	0.567914	0.382571	0	0	0	0	0	0.153064	0.0715518
0.288124	0	0	0	0	1	0	0.10962	0.946517	0.690047	0	0	0	0	0	0	0	0		0.64792	0.0922136	0.0279732	0.192009	0.0911688	0	0.20395	0.279341	1	0.444198	0.0352587	0	0.119657	0.0518513	0	0.116218	0.21033	0
0	0	0	0	0	1	0.145452	0	0.290819	0	0	0	0	0	0	0	0.107992	0.0565915		0	0.0442983	0	0	0	0	0	0	1	0.689022	0	0	0	0.221628	0.0832113	0.412955	0.398715	0.314987
0.10062	0	0	0	0.230257	1	0.38958	0	0	0	0	0	0	0	0	0	0	0.430436		0.728014	0	0	0	0	0	0	0	1	0.212678	0	0	0.0997173	0	0	0	0	0
0	0.130876	0.380942	0	0	1	0	0.0225603	0.15639	0.138022	0	0	0	0	0	0	0	0.193959		0.746014	0.412258	0.28084	0.237774	0	0	0	0	1	0.490105	0	0	0	0	0	0	0	0
0.0098002	0	0	0	0.297975	1	0.119771	0.37367	0.979627	0.0758364	0	0	0	0	0	0	0	0.0189714		0.192814	0.00901012	0	0.252184	0	0.237746	0	0	1	0.0866723	0.0947936	0.329589	0.00359552	0	0	0	0	0.309243
0.0712671	0.431665	0.0528136	0	0.59075	1	0.444444	0.114511	0.0150219	0.365286	0.877535	0	0	0	0.779616	0.441195	0.125196	0.0733197		0.606775	0.418555	0.673518	0.334036	0.345775	0	0	0.185021	1	0.994449	0.176709	0.195871	0.0594659	0.0508889	0.0195726	0	0.140547	0.25262
0.0906905	0	0	0.654385	0.0713313	1	0.222222	0.0155835	0	0.0145885	0.582081	0.582081	0.129351	0	0	0	0	0		0.476362	0	0	0	0	0	0	0	1	0.278261	0	0	0	0	0	0	0	0.0133893
0.172237	0	0	0	0	1	0.0252511	0.640372	0.384752	0.213774	0.213378	0	0	0	0	0	0	0.54463		0.236191	0.0286411	0.555869	0.435726	0.873478	0.392489	0	0.339895	1	0.662701	0.442919	0.13575	0.0977401	0	0	0.384355	0	0.27043
0.0901332	0.154292	0.0552738	0.152891	0.392989	1	0.372823	0.0824947	0.0776695	0.0754092	0.445387	0.331938	0.343126	0.645742	0.560335	0.117289	0.00366995	0.0390519		0.0964165	0.0219105	0	0.0985685	0.0296618	0	0	0	1	0.412935	0.660385	0	0	0	0	0	0	0
0.0478678	0.096255	0.455177	0.0327135	0.0663357	1	0	0.132025	0.39603	0.249275	0	0	0.0802224	0.307776	0	0	0	0.0509657		0.259734	0	0	0	0	0	0	0	1	0.303187	0	0	0	0	0	0	0	0.300105
0	0	0	0	0.5	1	0.907379	0.4	0.180424	0.0464025	0.00811358	0	0	0.0999159	0.0749369	0	0	0.00636462		0.16563	0	0	0.00278978	0.430497	0.404541	0.349687	0.484312	1	0.96236	0.221371	0.275323	0.535561	0.441528	0.499967	0.159634	0.428181	0.651156
0.0196887	0.244543	0.289798	0.461263	0.835168	1	0.575642	0.423546	0.0642308	0.110473	0.0251115	0.0899888	0.15073	0.309835	0.339964	0.192663	0.0224809	0.00589767		0.888142	0.699904	0.0885999	0	0.0386824	0	0	0	1	0.549487	0.047924	0.124613	0	0.0215276	0.137777	0	0	0.301612
0.345289	0.459215	0.614202	0.860697	0.570339	1	0.741207	0.739014	0.417223	0.285738	0.493873	0.499719	0.344594	0.502275	0.432347	0.409368	0.119824	0.0474471		0.655739	0.0383758	0.180856	0.248381	0.04805	0	0	0	1	0.330196	0.374958	0	0	0	0.497969	0	0	0.109729
0.104168	0.0233987	0.0582973	0.291486	0.229639	1	0.426327	0.9467	0.677017	0.73363	0.235159	0.0471481	0.219914	0	0	0.00984778	0.0357169	0.0143682		0.0503808	0.153181	0.956016	0.367911	0	0	0	0	1	0.723233	0	0	0.0378303	0	0	0	0	0.0870278
0	0.284172	0	0	0.25	1	0.686869	0	0	0	0	0	0	0	0	0	0	0		0.13966	0.304252	0	0.0157374	0	0	0	0.113925	1	0.846304	0.0288129	0.0160071	0.0664912	0.0864386	0.0332456	0.0432193	0.00576257	0.186848
0.0119038	0.0319727	0.21262	0.280083	0.669053	1	0.821332	0.355018	0.504065	0.578946	0.371774	0.446515	0.419225	0.529494	0.675534	0.682069	0.428816	0.371927		0	0.0102071	0.244072	0	0	0	0.434658	0.908812	1	0.101886	0	0	0.0149662	0	0	0	0	0
0.118634	0.0887414	0.0574689	0.529334	0.689414	1	0.948821	0.923739	0.489971	0.540404	0.420863	0.753729	0.554548	0.449609	0.17666	0.0811678	0.0952646	0.0113143		0.730447	0.676645	0.0870779	0.0374346	0	0.0401611	0.17499	0.437476	1	0.365672	0.0845336	0.0789595	0.180479	0.0360958	0.0298189	0.0661417	0.0036915	0.546732
0.0057978	0.1158	0.254679	0.307378	0.239922	1	0.551094	0.362326	0.195592	0.681036	0.831277	0.629474	0.379907	0.250114	0.263587	0.151114	0.308895	0.200005		0.760598	0.963776	0.369101	0	0	0	0.101724	0.508618	1	0.568461	0	0	0	0	0	0	0	0.447621
0.160576	0.204764	0.182141	0.376438	0.796887	1	0.641797	0.514238	0.203797	0.0908224	0.0246829	0.0339071	0.165322	0.327331	0.478289	0.289388	0.169344	0.387009		0.622375	0	0.253022	0.271889	0	0	0	0	1	0.685383	0	0	0	0	0	0	0	0
0.219913	0	0	0	0.34748	1	0.186449	0.0488997	0	0.0110495	0.0316597	0.350147	0.252372	0.101063	0.0182443	0.0316585	0.31885	0.0880705		0.094905	0	0	0.0277476	0.064414	0	0	0.0647541	1	0.846238	0	0	0.00477099	0	0	0	0	0.328153
0.0997992	0.385522	0	0	0.666667	1	0.809524	0	0	0.116815	0	0.0654067	0.0264335	0.0213616	0.138825	0.79493	0.27819	0.0318753		0.442512	0	0.0350738	0.11534	0	0	0	0.796057	1	0.749746	0.077057	0	0	0.20657	0.47981	0	0.0213992	0.195409
0.19322	0.517075	0.486984	0.0523632	0.343992	0.701103	1	0.676308	0.542387	0.294661	0.384244	0.270524	0.344498	0.229119	0.325232	0.175197	0.0287283	0.295265		0.0969763	0.202348	0.211628	0.169231	0	0	0	0	1	0.273943	0	0	0	0	0.374117	0.444612	0.374117	0.291462
0.0450521	0.023472	0.0557843	0.277932	0.325642	0.809889	1	0.975554	0.035711	0.117612	0.176347	0.132727	0.130676	0.0351108	0.150847	0.201885	0.122024	0		0.946086	0.0212758	0.0962551	0.132412	0	0	0	0.755519	1	0.164867	0.472314	0	0	0	0	0	0	0
0.0568987	0.665355	0.684511	0.994933	0.561538	0.574059	1	0.872765	0.293373	0.242122	0.579486	0.735512	0.282229	0.139794	0.163435	0.094135	0.241111	0.195432		0.484199	0.0200251	0	0.143762	0	0	0	0	1	0.302464	0	0	0	0	0	0	0	0.0181643
0.0180517	0.371452	0.362574	0.835574	0.342942	0.342652	1	0.918815	0.430202	0.0998304	0.492672	0.463387	0.0992448	0.106692	0.0204249	0.100195	0.232552	0.155866		0.120017	0.268453	0	0	0	0	0	0	1	0.564601	0.682539	0	0	0	0.0384994	0	0	0.0330391
0.100865	0.0678729	0.147633	0	0	0	1	0.77598	0.0912418	0.107809	0.0720676	0	0	0.0173856	0.075712	0.245826	0.234664	0.166902		0.251531	0.005331	0.254371	0.659254	0.8613	0.964752	0	0	1	0.542559	0.240086	0.00784917	0.0326042	0.0423855	0.0163021	0.0211928	0	0.017224
0.0905023	0.204156	0.558136	0	0	0	1	0.651508	0.0037249	0.0166412	0	0	0	0.0496567	0.108475	0.0331821	0.0154041	0.00767577		0	0	0	0	0	0	0	0	1	0	0	0	0	0	0	0	0	0.3407
0.354824	0.364044	0.513467	0.077961	0.278734	0.707154	1	0.524118	0.492792	0.381102	0.444422	0.40995	0.287739	0.33526	0.175375	0.0806073	0.0229981	0.43415		0.294562	0	0	0	0	0	0	0	1	0.494655	0	0	0.0238203	0	0	0	0	0.198753
0	0.527709	0.718707	0.650913	0.953276	0.509749	1	0.13752	0.618013	0.124574	0.352826	0.136965	0.0548185	0.340694	0.443843	0.0349411	0.216121	0		0	0	0	0	0	0	0	0	1	0	0	0	0	0	0	0	0	0
0.218016	0	0.386962	0.171392	0.105944	0.353574	1	0.475735	0.409724	0.570478	0.560368	0.35505	0.292977	0.232941	0.00483125	0.0074671	0.285484	0.0341543		0.419672	0.219384	0	0	0	0	0	0	1	0.772892	0.31228	0	0	0	0	0	0	0
0.13864	0.240885	0.146241	0.129417	0.151105	0.57959	1	0.739484	0.105615	0.235274	0.180574	0.189009	0.0651897	0.322168	0.207127	0.375299	0.552013	0.206532		0.045546	0.41936	0.191147	0	0	0.228388	0.233283	0.432642	1	0.489264	0.38611	0	0.0800932	0.18642	0.155779	0.0520606	0.00694141	0.416817
0.0718272	0.173705	0.717281	0.432601	0.0529559	0.560551	1	0.45889	0.183503	0.397319	0.431136	0.300688	0.322236	0	0.0434639	0.209083	0.0552261	0.127588		0.126403	0.192088	0	0.0425216	0	0	0	0	1	0.95368	0.0252256	0	0	0	0.378468	0.585443	0.234674	0.0257884
0.191032	0.0484371	0.403665	0.163597	0.66329	0.815722	1	0.636872	0.015164	0.341035	0	0	0.0113105	0	0	0.0238824	0	0		0.497607	0.60325	0	0	0	0	0	0	1	0.790919	0.133973	0	0	0	0	0	0	0
0.0547176	0.139547	0	0	0	0.836404	1	0.776786	0.665346	0.182423	0.0178592	0	0	0	0	0.00222401	0	0		0	0.0220085	0.0901246	0.0498915	0.164661	0	0	0.408337	1	0.306522	0	0	0	0	0	0	0	0
0	0.296969	0.0416188	0.152286	0	0.399191	1	0.641358	0.252131	0.298517	0.363565	0.0972919	0.0274749	0.0901112	0.0143	0.703635	0.264291	0		0.429062	0.64587	0.854387	0.243164	0.173271	0.459647	0.428481	0.694402	1	0.336537	0.245363	0.999359	0.976402	0.888366	0.54085	0.0728584	0.312996	0.163789
0.125078	0.0358881	0.0268149	0	0.299529	0.737191	1	0.473867	0.127895	0.0970096	0	0	0.0825629	0.036606	0.0179172	0.0107821	0.0357905	0		0.208295	0	0.0151826	0	0	0	0	0.0710558	1	0.716067	0	0.0865279	0.055813	0.0188956	0.0622096	0.266381	0.201431	0.162005
0	0	0	0	0	0	1	0	0	0	0	0	0	0	0.0231112	0	0	0		0.1697	0.0228763	0.0281975	0.0798783	0.145977	0.0416096	0	0.293336	1	0.307905	0.109291	0.00437166	0	0.00300013	0	0.00706572	0.0504299	0.304003
0	0.142501	0.969933	0.0500419	0.124116	0.76952	1	0.20701	0	0.256393	0.143669	0.796623	0.457159	0	0	0.127577	0	0.155678		0.332831	0.13233	0.129783	0.342887	0.521799	0.473912	0.31392	0.353298	1	0.239898	0.115132	0.159089	0.228259	0.479966	0.566909	0.415886	0.235476	0.224293
0.24601	0.0173079	0.0724954	0.0296016	0	0.350981	1	0.970603	0.900743	0.262374	0.0191835	0.0717325	0.0146674	0	0.0306192	0.018486	0.103802	0.0294181		0.0975806	0.146356	0.0613184	0.134542	0.276265	0.0679859	0	0.241263	1	0.262941	0.394897	0.197269	0.305323	0.0312739	0.211346	0.224915	0.116356	0.0964677
0.0570032	0.255001	0.39633	0	0	0.341616	1	0.74516	0.474988	0.216729	0	0.0193582	0.0945502	0.220108	0	0.0423708	0.225757	0		0.321686	0.132605	0.0118323	0.0100679	0.0264598	0.00268638	0.0974035	0.106265	1	0.876852	0.703976	0	0.568858	0.0131608	0.0532108	0.0563883	0.0234471	0.303937
0.771867	0.686131	0	0	0	0.580559	1	0.151416	0.316896	0.991627	0.192565	0	0	0	0.00769125	0.0735892	0	0		0.14942	0.051696	0.195309	0.0680047	0.0942934	0.0758075	0.239024	0.423343	1	0.403664	0.190118	0.0890682	0.15857	0.123357	0.273908	0.148954	0.182768	0.417335
0.0145215	0.151119	0.237155	0.158852	0.0194465	0.413064	1	0.361811	0.150159	0.253429	0.0975387	0.147191	0	0.433024	0	0.0944885	0.530888	0.223587		0.290079	0.501366	0.609675	0.377643	0.136708	0.0188175	0	0.244522	1	0.728444	0.335736	0.0679986	0.252265	0.504694	0.311656	0.160514	0.453742	0.469325
0.73126	0.451491	0.169219	0.540648	0.822565	0.53538	1	0.51207	0.44674	0.538988	0	0.319074	0.376358	0.0269353	0.434616	0.721173	0.493296	0.343111		0.0395097	0.0215988	0.0204276	0.0571716	0.0629825	0.0290352	0.1411	0.469426	1	0.708275	0	0.0154457	0.0791756	0	0.00535154	0	0	0.0695958
0.0138199	0.0560859	0	0	0.245588	0.0257888	1	0.663265	0.0640179	0.337749	0.0761027	0	0	0	0	0	0	0.0684694		0.201361	0.587387	0.453752	0.496602	0.28059	0.0653023	0	0.380741	1	0.918729	0.369361	0.369361	0.0410401	0.0716687	0.0605234	0.032118	0.106279	0.0234268
0.0530519	0.0162334	0	0.120135	0.524463	0.963957	1	0.291605	0.0853485	0.049872	0	0.0110036	0.152052	0.194068	0.0512184	0.0598352	0.13458	0.092874		0.540206	0.29675	0.928473	0.828793	0.821871	0.46133	0.437977	0.294306	1	0.451081	0.486251	0.364688	0.308532	0	0	0.0656761	0.19827	0.954938
0.00868997	0.256702	0.606434	0.284815	0	0.921632	1	0.261837	0	0	0	0.145753	0.579787	0.206799	0.881658	0.468464	0.804246	0.0192977		0.229134	0.211977	0.0755546	0.0223346	0.00262588	0	0.215806	0.732655	1	0.375235	0.332151	0.109596	0.54943	0	0	0.0813339	0.00520749	0.23732
0	0	0	0	0	0.714286	1	0.610438	0.41757	0.537655	0.0745305	0	0	0	0	0	0	0.153681		0.0958832	0.061673	0	0.109394	0.166389	0.254847	0.171621	0.332857	1	0.352842	0.036584	0.0126463	0	0	0.0260581	0.11066	0.0213467	0.0858283
0.0480801	0.265408	0.484772	0.693088	0.387206	0.551945	1	0.431395	0.0560987	0.119559	0.184456	0.415205	0.394795	0.57158	0.137592	0	0.0872368	0.0229694		0.0862014	0.083354	0.115865	0.0570296	0.117746	0.0142063	0.00776778	0.0049023	1	0.34236	0.00430432	0.0246053	0.0890946	0.0354587	0	0.0102446	0.55635	0.224487
0.0383604	0.0531519	0.0115856	0.141724	0.212839	0.289631	1	0.0928652	0.238399	0.19014	0.254255	0.126363	0	0	0.263189	0.52431	0.591991	0.0265094		0.0990039	0.0885777	0	0.0183008	0.168016	0.40408	0.108671	0.144667	1	0.863224	0	0.0422113	0	0.110548	0.169916	0	0.0492822	0.128747
0.648113	0.341585	0.0544229	0.366308	0.0111002	0.9151	1	0.682806	0.0333105	0.454192	0.128829	0.127706	0.197309	0.115704	0.170265	0.343454	0.0166212	0.419416		0.283806	0.637099	0.0428538	0.0881979	0.0204904	0.0671578	0.0277576	0.142963	1	0.425944	0.125159	0.142067	0.526483	0.211466	0.148853	0.269999	0.854168	0.644054
0.681104	0.105432	0.0630156	0.40183	0.299089	0.217686	1	0.0840398	0.441564	0.511742	0.0356409	0	0	0	0	0	0.112197	0.306673		0.320039	0.729666	0.199625	0.533195	0.301836	0.109747	0.422417	0.167972	1	0.854441	0.332523	0.712782	0	0.0205897	0.223184	0.355223	0.0441613	0.365735
0.00413479	0.0594709	0.555076	0.230792	0.473254	0.0916929	1	0.358931	0.619954	0.142897	0.073042	0.23535	0.500118	0.647381	0.186198	0	0.146242	0.148796		0.600148	0.475247	0.390696	0.0865	0.0601729	0.110649	0.10716	0.441456	1	0.286077	0.357581	0.125318	0	0.00472594	0.315266	0.267766	0.538476	0.881206
0.299778	0.0343664	0.132834	0.320506	0.855449	0.819208	1	0.902548	0.668013	0.684039	0.375782	0.115403	0.0515906	0	0	0	0.0312609	0.0726329		0.0810236	0.00696304	0.0457401	0.116137	0	0.252988	0.252988	0.498883	1	0.0463506	0.320153	0.0628625	0.0794934	0.399169	0.149688	0.0356364	0.125123	0.415243
0.464161	0.192873	0.361405	0.832383	0.453601	0.441018	1	0.521488	0.0442283	0.36226	0.868715	0	0.102125	0.0687001	0.526151	0.50642	0.295704	0.572433		0.0415411	0.0631521	0	0	0	0	0	0.089379	1	0.327604	0	0	0.116451	0	0	0.041335	0	0.00134353
0.122103	0.0409753	0.123923	0.0231697	0.610734	0.800959	1	0.998334	0.827586	0.516471	0.123646	0.255362	0.251769	0.724898	0.724898	0.533983	0.944038	0.390859		0.230849	0.399905	0.00451949	0.0827853	0.0265519	0.0408437	0.323755	0.178113	1	0.991474	0.0112139	0	0.0394015	0.0678467	0.0194842	0	0.0546318	0.146287
0.109661	0	0	0	0	0.0714286	1	0.923077	0.316484	0	0.450958	0	0	0	0	0	0	0.10969		0.319845	0.467784	0	0.621781	0.0622129	0.135255	0.189641	0.367533	1	0.389832	0.516877	0.141013	0.0308082	0.474155	0.505363	0.516959	0.249019	0.0916732
0.0453074	0.597708	0.786318	0.84129	0.443279	0.453588	1	0.719125	0.130638	0.637945	0.790149	0.920991	0.725998	0.982144	0.245277	0.357196	0	0.0199802		0.0261866	0.0963563	0.00345175	0.0377497	0.0269641	0.0270673	0.213742	0.318772	1	0.654043	0.0166267	0	0.0142822	0	0.00476961	0.00210424	0.00918857	0.000629365
0.237267	0.598411	0.248151	0.0338387	0	0.743703	1	0	0.982978	0.849317	0	0	0	0.346548	0	0	0	0.705438		0.236259	0.172586	0.03986	0.0327149	0.126186	0	0	0.226619	1	0.187724	0	0	0.0270791	0.119827	0	0	0	0.194966
0.0445505	0	0.0287361	0	0.0215123	0.257382	1	0.887216	0.194883	0.214798	0	0	0	0	0	0.0215363	0.437122	0.027127		0.416525	0.231669	0.816418	0.0446573	0.0526246	0.0585197	0.046817	0.0671615	1	0.151994	0	0.0180537	0.0182409	0.00492814	0	0.102159	0.40734	0.822821
0.0327905	0	0.449124	0	0.0691886	0.141557	1	0.606272	0.317951	0.0389645	0.285974	0	0.234818	0	0	0	0.0343819	0.00690228		0	0	0	0	0	0	0	0	1	0.152584	0	0	0	0.0347198	0	0.177169	0.177706	0.0287174
0.0153294	0	0	0.213752	0.711433	0.974764	1	0.664029	0.0938013	0.0734819	0.126163	0.0288365	0	0	0	0.0695618	0.0642533	0.120542		0.273428	0.0741642	0.0582716	0.0400116	0.0417113	0	0.146031	0.577433	1	0.355387	0	0.115123	0.14118	0	0	0.0438157	0.0763944	0.547191
0.400812	0.294798	0.0167649	0.311972	0.0373716	0.0214559	1	0.0490567	0.0561634	0.0120014	0.0211687	0	0	0	0	0	0	0		0	0	0	0	0	0	0	0.240189	1	0.520663	0	0	0	0	0	0	0	0
0.123539	0.11079	0.0680298	0.514069	0.948887	0.830657	1	0.297606	0.977673	0.891881	0.655568	0.594959	0.701517	0.717339	0.557744	0.568935	0.291692	0.606145		0	0.039785	0	0	0.0158201	0	0	0.139654	1	0.376969	0	0	0.00307199	0.0921596	0	0.0187416	0	0.0598227
0.16266	0.265736	0.192794	0.131382	0.527654	0.917411	1	0.653494	0.326882	0.134244	0.0319558	0.0892702	0.102454	0.161663	0.398291	0.26297	0.114548	0.437655		0	0	0	0	0	0	0	0.0625076	1	0.819181	0	0	0	0	0.126963	0	0	0.36652
0.0722934	0	0	0	0	0	1	0.0240833	0.0469786	0.225191	0	0	0	0	0	0	0	0		0.328516	0.783415	0.599311	0.588652	0.35408	0.317567	0.632903	0.21107	1	0.35043	0.576959	0.186603	0.162127	0.428611	0.333142	0.396401	0.0975013	0.150817
0.0264243	0.0317456	0.0262569	0.101756	0.148127	0.836409	1	0.622028	0.197133	0.184936	0.22488	0.354487	0.719481	0	0.0265612	0	0.195413	0.216842		0	0	0	0	0	0.266008	0.620685	0.441275	1	0.16656	0.42064	0	0	0	0	0	0.449286	0
0.266864	0.140695	0	0	0.808129	0.394907	1	0.848109	0.10942	0.312364	0.237025	0.48539	0.292032	0.675344	0.288837	0.164788	0.599718	0.0216551		0.889609	0.710143	0.992527	0.917017	0	0.107642	0.525214	0.517536	1	0.999741	0	0.0134936	0	0	0.251772	0.264029	0.649823	0.273297
0.0290811	0	0	0	0.535649	0	1	0.91202	0.608965	0.797366	0.440133	0.0628762	0	0	0	0.424577	0.799831	0.213596		0	0	0.0526539	0.878568	0.0186732	0.564124	0.256668	0	1	0.585109	0.162301	0.102731	0.297317	0.0745729	0	0.0376411	0.118459	0.776548
0.181153	0	0.0793064	0	0	0.866143	1	0.318581	0.0845806	0.0391057	0	0	0	0	0	0	0.0222809	0.0201374		0	0	0	0	0	0	0	0.0995849	1	0.905943	0.0991283	0	0	0.0149906	0	0.0470732	0	0.126846
0.0289637	0.0891669	0.0530632	0	0	0.191626	1	0.702101	0.653869	0.319924	0.0294636	0.147318	0.163687	0.0526136	0	0	0.132455	0.114292		0.291878	0.78043	0.674486	0.411293	0.227052	0.0481982	0.0333334	0.289733	1	0.4199	0.163068	0.260947	0.260867	0.366444	0.319462	0.155205	0.347409	0.22505
0.364101	0.31211	0.600131	0.972049	0	0	1	0.0613577	0.0703865	0.0870253	0	0	0	0	0	0	0.0363346	0		0.0241628	0.0444908	0.491484	0.334951	0	0.0361582	0.152126	0	1	0.901067	0.365325	0.642181	0.0608671	0.0400649	0	0.200834	0.611505	0.34606
0.0842981	0.0684966	0.123431	0.652258	0.662615	0.902286	1	0.619823	0.417753	0.084941	0.0228378	0	0	0.244836	0.454695	0.956881	0.205872	0.528374		0.126476	0.0721032	0.0391577	0.106095	0.115866	0.0779466	0.233779	0.361782	1	0.332312	0.132127	0.144204	0.12151	0.070621	0.0328609	0.00570835	0.101554	0.128636
0.0448721	0.0541343	0.0489772	0	0	0.4054	1	0.823947	0.658694	0.111386	0	0	0	0	0	0.0298094	0.00594881	0.0808711		0.146565	0.131681	0.0758954	0.138715	0.215777	0.0648593	0.209605	0.349703	1	0.450475	0.220533	0.172515	0.208347	0.111433	0.0858699	0.11501	0.0482411	0.202653
0.2037	0.0236999	0	0.141309	0.102865	0.362956	1	0.448135	0.254873	0.231508	0.0753301	0.10998	0.128493	0.0796196	0.0678828	0.0519351	0.0407877	0.133949		0.0553669	0.110304	0.0990772	0.115596	0.0516513	0.029949	0.057616	0.209882	1	0.467093	0.0238279	0.00898026	0.0250184	0.0558513	0.0180032	0.0877806	0.0962476	0.136336
0.00900127	0.126702	0.910358	0.569966	0.568392	0.510423	1	0.83887	0.184471	0.293897	0.180054	0.448171	0.352618	0.447315	0.470221	0.154144	0.0442674	0.0526436		0.011536	0.0168458	0.0457925	0.106994	0	0	0	0.113164	1	0.676833	0.024118	0	0.066543	0.158125	0.173481	0.175705	0.00994605	0.0065491
0.264912	0.044427	0	0.101223	0.524596	0.739976	1	0.798242	0.205177	0.182789	0.134424	0.0270672	0.258664	0.540655	0.546695	0.224562	0.0839192	0.0419128		0.0422782	0.0531706	0.0243876	0	0.00819024	0.00455013	0.00910026	0.702728	1	0.81761	0	0.0934262	0.0273901	0	0	0.0549429	0.0486655	0.0311428
0.0620281	0	0	0	0	0	1	0.615789	0.149201	0.072797	0	0	0	0	0	0	0	0		0.00363967	0.0113942	0.0813041	0.0114574	0.00305784	0	0.0287103	0.194081	1	0.665498	0.100069	0.00645608	0	0.0091312	0.0398452	0.0772911	0.0180313	0.0166249
0.0689003	0.599543	0.451885	0.165319	0.326369	0.43958	1	0.46859	0	0.0571489	0.31689	0.187171	0.258529	0.0926372	0	0.0566003	0.0136583	0.109359		0.482652	0.490167	0.248871	0.403131	0.655359	0.358412	0.511119	0.219415	1	0.994873	0.827068	0.534178	0.135471	0.133718	0.484587	0.602047	0.0353514	0.589744
0.107861	0.02178	0	0.0464102	0.00946328	0.18038	1	0.847835	0.936065	0.866299	0.511354	0.250762	0.248251	0.0312261	0.0414006	0.0213931	0.101548	0.0519442		0.0461167	0.041441	0.0404291	0	0	0	0.00884502	0.0450611	1	0.718968	0.133473	0.0227464	0.0259584	0.00688658	0.0320787	0.00567421	0	0.0316209
0.0730779	0	0	0.285728	0.522084	0.690331	1	0.663279	0.617159	0.419856	0.00300451	0	0	0.0807752	0.582561	0.51088	0.464029	0.214917		0.321862	0.163927	0	0	0.0169059	0.00805041	0	0	1	0.191235	0.202371	0.365811	0.0317774	0.0988564	0.278522	0.221861	0.170857	0.384409
0.397487	0.812029	0	0	0	0.282791	1	0	0.0180937	0.961405	0.85732	0.261488	0.187716	0.558085	0.87482	0.198489	0.107008	0.110918		0.386079	0.138495	0.891861	0.116021	0	0	0	0	1	0.248153	0	0	0.110874	0	0	0.0778928	0	0
0.331435	0.313783	0	0.203029	0.293264	0.197352	0.156904	1	0.623427	0.732442	0.44881	0	0.131285	0.194802	0.440527	0.340675	0.05716	0.13578		0.19447	0.0821224	0.261776	0.275156	0.151071	0.132915	0.187211	0.246804	1	0.463731	0.116697	0.30191	0.165369	0.00605208	0	0.0800141	0.107195	0.197813
0.188964	0.406949	0	0	0.492349	0	0.299766	1	0.179442	0.0630426	0	0	0	0.0383933	0.0148449	0.144834	0.0828303	0.243918		0.00215514	0.00382147	0.0224245	0.0547579	0.0290933	0	0	0.05004	1	0.622191	0.00252515	0.0048382	0.0362226	0.00565872	0.0149266	0.0113075	0	0.044788
0.36294	0	0.164928	0.905195	0.874006	0	0	1	0.272436	0.240178	0.912677	0	0	0.135374	0	0.749763	0	0		0.296195	0.00532137	0.0172009	0	0.0272004	0	0	0.299521	1	0.27291	0	0.0992683	0	0.176437	0.110273	0	0.0189998	0.0199272
0.540029	0.331209	0.0355488	0.454949	0.115439	0	0.0104508	1	0.701707	0.74804	0.388414	0	0	0.171671	0.46678	0	0.0191006	0.705758		0.151099	0.0322368	0.00312282	0	0.00278289	0.00463815	0	0.0335052	1	0.714282	0	0	0.0437801	0.200455	0.103132	0.0981311	0.0233358	0.0445762
0.51675	0.335206	0	0	0	0	0	1	0.784646	0.76836	0.255953	0	0	0.274724	0	0	0.259232	0.112288		0.0151629	0	0	0	0	0	0	0	1	0.285653	0	0	0.0618567	0	0	0	0	0.0571668
0.218	0.092572	0	0	0	0	0	1	0.0781797	0.0140374	0.195087	0	0	0.222222	0.642795	0.021981	0	0		0	0	0.0366601	0.123457	0.00440842	0	0.247828	0.305787	1	0.686711	0.0619349	0.154396	0.042358	0.17218	0.034436	0.0823596	0.0615874	0.152432
0.841803	0.383952	0.30004	0.365019	0.223818	0.0211036	0.452591	1	0.175332	0.300695	0.808962	0.589311	0.346884	0.543789	0.470867	0.532902	0.592198	0.411407		0	0.330893	0	0.662422	0.229221	0.669058	0.983121	0	1	0.109616	0.285481	0	0.120829	0.966633	0.27685	0	0.128915	0.767479
0.495643	0.106158	0	0	0	0.103775	0.204783	1	0.0772149	0.0118807	0.0346499	0	0	0.0103312	0	0.0426778	0	0.0706193		0.149613	0.510435	0.104677	0.199339	0	0	0	0.158615	1	0.241395	0.237008	0	0	0	0	0.0271485	0.0758332	0.254527
0.197888	0.107316	0.0445897	0	0.0309429	0	0	1	0.807029	0.0710285	0.249915	0	0	0.0087312	0.00735786	0.0301879	0.287902	0.00663022		0.152307	0.0554891	0.179007	0.0777587	0	0	0	0.228094	1	0.257707	0.109903	0	0	0.0168986	0	0	0.116801	0.214814
0.136376	0.0928605	0.328253	0.675314	0.346266	0	0.333333	1	0.334226	0.00801132	0.35354	0	0	0.0165621	0	0.0818115	0.639876	0.9756		0.317682	0.507494	0.465686	0.198593	0	0	0	0.38276	1	0.107922	0	0	0	0.650228	0	0.150252	0	0.106006
0.0172423	0.0794187	0.167595	0.399447	0.405769	0.418704	0.90303	1	0.0708565	0.0203466	0.0461238	0.0703438	0.123539	0.0320584	0.102605	0.0692806	0.0810019	0.0250357		0	0	0	0	0	0	0	0	1	0.36618	0	0	0	0	0	0	0	0
0.384106	0.296255	0.248522	0	0	0	0.0525377	1	0.928635	0.128556	0.0920894	0	0	0.276826	0.0185767	0.0361706	0.018501	0.117407		0.329474	0.0194334	0.161049	0.0131171	0	0	0	0.421833	1	0.390305	0	0	0	0	0	0	0.21962	0.265762
0.280276	0.777538	0.39911	0.235071	0	0.190978	0.534606	1	0.981436	0.75108	0.701372	0.0998598	0.815203	0.727002	0.00228916	0	0.150254	0.0905028		0.0280478	0.924648	0.590607	0.103773	0.0998391	0.522928	0.303548	0.146588	1	0.333925	0.398831	0	0	0	0.377097	0.0901496	0	0.441446
0.0793929	0.0268729	0.0783498	0	0	0.066887	0.869531	1	0.307683	0.228172	0.21202	0.141307	0.290276	0.397282	0.168741	0.0106705	0.00953037	0.315177		0	0	0	0	0	0	0	0	1	0.400477	0	0	0	0	0	0	0.0813198	0.189254
0.386267	0.185759	0.310855	0.113146	0	0.210495	0.00466012	1	0.542107	0.15599	0.138184	0.0575767	0.0211418	0.485859	0.265926	0.116292	0.251356	0.410185		0.304973	0.629078	0	0	0	0	0	0.32612	1	0.217263	0.0501786	0.131034	0	0.0987691	0	0.293216	0.35061	0.141214
0.399429	0.083081	0.649029	0	0	0	0.132557	1	0.342796	0.212999	0	0	0	0.0668653	0	0.732879	0.352204	0		0.0623268	0.84568	0	0	0	0	0	0	1	0.635614	0.694483	0	0	0	0	0	0	0
0.477505	0.194712	0.293376	0.786422	0.459228	0.9184	0.879388	1	0.909764	0.478873	0.454303	0.291995	0.011292	0.171629	0.0686105	0.0138422	0	0.0329864		0.17833	0.126952	0	0	0	0	0	0	1	0.34387	0	0	0	0	0	0	0.825972	0
0.642462	0.116406	0.0305926	0.1203	0.129945	0.297425	0.90236	1	0.824303	0.242554	0	0.296392	0.164952	0.002528	0	0	0	0		0.39056	0.0564614	0	0	0.908016	0.309194	0.781122	0.613378	1	0.677694	0	0	0	0	0.0326334	0	0.478076	0
0.0265192	0	0.20817	0.173222	0.147996	0.978389	0.707133	1	0.355135	0.225585	0.390441	0.416506	0.268985	0.0336623	0.0880701	0.14771	0.338251	0.526932		0.0301931	0.13679	0	0.0623503	0	0	0	0.418813	1	0.0798935	0	0.17819	0.0941247	0.482607	0.363195	0.123539	0	0.102318
0.879204	0.0888911	0.527722	0.109342	0	0.769743	0.981396	1	0.85455	0.758366	0.748168	0.773418	0.823234	0.593599	0.270394	0.227825	0.24096	0.602695		0.0365248	0.594787	0	0	0	0	0.32092	0.0397492	1	0.143355	0	0	0	0	0	0	0.0675228	0.788907
0.372298	0.349361	0.85124	0.0820532	0	0.104471	0.569402	1	0.430318	0.282747	0.0957869	0.345408	0.397275	0	0	0.0985755	0.400373	0.875688		0.929692	0.326177	0	0.0790382	0	0	0	0	1	0.242218	0	0	0	0.391571	0	0	0	0.931047
0	0	0	0	0.244161	0.772423	0.726986	1	0.637804	0.124129	0.00565978	0	0	0	0	0	0.0358946	0.0903621		0	0	0	0	0	0	0	0.271605	1	0.389389	0	0	0	0	0	0	0.201101	0
0.559035	0.444789	0	0	0	0	0.231057	1	0.809789	0.23	0.20894	0.100613	0.0441907	0	0.553935	0.0750153	0.192347	0		0.133542	0.227093	0	0.0130088	0	0	0	0.0652718	1	0.69722	0	0	0	0.0205403	0.0610381	0.0567881	0.0953643	0.468905
0.358204	0.215579	0.151039	0.257271	0.477789	0.526287	0.804543	1	0.3066	0.0166351	0.00657787	0.118135	0.04387	0.0680188	0.158623	0.0563992	0	0.00160031		0.770002	0.51514	0.484662	0.371682	0.663202	0.661248	0.371803	0.321802	1	0.632465	0	0.221088	0.28647	0.0650475	0	0.338325	0.897169	0.734304
0	0.205522	0	0	0	0	0	1	0.208209	0.319908	0.50447	0	0.469325	0	0	0.895059	0	0		0.154686	0	0	0	0	0	0.625	1	1	0.666667	0	0	0.497086	0.127719	0	0.342099	0	0
0.112875	0	0	0	0.268876	0.219133	0.639081	1	0.861021	0.746644	0.981143	0.164008	0.00973465	0	0.013232	0.0332247	0	0.00529336		0.220304	0.288787	0.466284	0.128783	0	0	0.0399588	0.122489	1	0.545675	0.319446	0.233642	0.299122	0.160244	0	0	0.61017	0.143587
0.021721	0.0557039	0.313648	0.4787	0.260036	0.172043	0.420552	1	0.796855	0.417083	0.67282	0.483875	0.043271	0.0108797	0.0855445	0.00565718	0	0.0512058		0.126586	0.0441969	0	0.107174	0.56824	0.451049	0.0589934	0.00710731	1	0.464558	0.125393	0	0.222524	0.173677	0.286937	0.241484	0.846585	0.542903
0.575781	0.218271	0.0686221	0	0.0109545	0.00406895	0.388711	1	0.260214	0.531036	0	0.525229	0	0	0	0	0.210105	0.629452		0	0	0	0.314023	0.407381	0.101845	0	0.640108	1	0.540406	0	0	0	0.0319156	0.125379	0.444205	0.793441	0.597033
0.0583867	0	0	0	0	0	0.106653	1	0.802952	0.138319	0.396131	0	0	0	0	0	0.129056	0.587448		0.800411	0.44081	0.3989	0.899254	0.415458	0.349514	0.0195483	0.0486748	1	0.071058	0.348921	0.346008	0.0845891	0	0	0.331084	0.469045	0.130786
0.29055	0.0370083	0.0128304	0.202544	0.165503	0.0251342	0.0502683	1	0.208277	0.220401	0.27458	0.274722	0.284012	0.233676	0.0821793	0	0	0		0.575409	0	0	0	0	0	0	0	1	0.75	0	0	0	0	0	0.5653	0	0.165233
0.124381	0.0474096	0.217361	0.27827	0.101057	0.0862109	0.759213	1	0.833581	0.581635	0.807069	0.583991	0.535407	0.327781	0.206893	0	0.0890088	0.0821921		0.152986	0.424439	0	0	0	0.0258691	0.28456	0	1	0.634019	0.260493	0	0	0.233676	0	0	0.0997812	0.300851
0.269812	0.0794507	0.216188	0	0	0.13133	0.474718	1	0.166493	0.63589	0	0	0	0	0	0	0	0.0595008		0	0.489942	0.273605	0	0	0.0458053	0.997641	0.979125	1	0.403456	0	0	0	0	0	0	0	0
0.0127843	0.123667	0.0500244	0.336457	0.0075714	0	0.736699	1	0.745293	0.178807	0	0.256048	0.31618	0	0.215129	0.113077	0	0		0.419421	0.3212	0.125434	0.0337392	0.243229	0.0316557	0	0.10466	1	0.900191	0.512109	0.232227	0.00663106	0.372694	0.272777	0.414267	0.375897	0.0834888
0.625505	0.309294	0.313446	0.394467	0.23668	0.0131318	0.139775	1	0.347549	0.030135	0.00708724	0	0.198385	0.48904	0.135701	0.191392	0.371441	0.380957		0	0	0	0	0	0	0	0.594914	1	0	0	0	0	0	0	0	0	0.0645994
0.0831617	0.204136	0.0303456	0	0.216417	0.0453445	0.861538	1	0.736023	0.375428	0.0957843	0.456036	0.456036	0.399653	0.114744	0.236679	0	0		0.0155784	0.165813	0.648486	0.413654	0.165462	0.0935912	0.528515	0.183362	1	0.232897	0	0	0	0	0	0	0	0.494598
0.493594	0.225163	0.228858	0.232951	0.171568	0.0223245	0.489823	1	0.664166	0.970094	0	0	0	0	0.152087	0.217069	0.301115	0.289065		0.00355682	0	0.0980691	0.236643	0.604272	0	0.0653081	0.713952	1	0.415044	0.00332315	0	0.292265	0.0417522	0.257878	0.304136	0.130024	0.215277
0.157855	0.168988	0.142639	0	0	0.370396	0.789917	1	0.697416	0.688366	0	0	0	0	0	0	0.201995	0.157249		0.301431	0.702606	0.425406	0.290026	0	0	0	0	1	0.348452	0.801921	0	0	0	0	0	0	0.510473
0.0271405	0.0243375	0.00823838	0	0.0103708	0.00765312	0	1	0.0554198	0.119979	0.223117	0	0	0	0	0.166262	0.100262	0.369324		0.578241	0	0	0	0.353047	0	0.0229417	0.823503	1	0.644962	0	0	0.488289	0	0	0.132431	0	0
0.273263	0.0412848	0.0888641	0.113642	0	0.0133414	0	1	0.504753	0.698082	0.490111	0.303053	0.439474	0.763172	0.196429	0	0	0.0674696		0.456349	0.820556	0.273	0.374305	0.680521	0.040738	0	0.359141	1	0.638421	0.153489	0	0	0.0464589	0.877866	0.285935	0.124382	0.597861
0	0.0840331	0.254055	0	0	0	0	1	0.5757	0.916525	0	0	0	0	0.239109	0.845491	0.163657	0.111551		0	0	0	0	0	0	0	0.248739	1	0.489583	0.959183	0	0	0	0	0	0	0
0.71987	0.291333	0.267662	0.289548	0.176502	0.014987	0.0874017	1	0.349374	0.696185	0.0812186	0.506455	0.609811	0.309666	0.0586895	0	0.0352133	0.143298		0	0	0.0455955	0.74044	0	0	0	0	1	0.0183868	0.166237	0	0	0	0	0.74255	0.936837	0.747644
0.173757	0.934511	0	0.392277	0.588416	0	0	1	0.068268	0	0.655028	0.371182	0	0	0	0	0	0.274573		0.0366388	0	0	0.209585	0.298817	0.158357	0.0156139	0.254377	1	0.481779	0	0	0	0.11792	0.1771	0.0509181	0	0.192655
0.168673	0.30484	0.0987695	0.0395567	0	0	0.0434857	1	0.766892	0.450201	0	0	0	0	0.0236218	0	0.0114082	0.00676886		0	0.0481444	0.00956379	0.0491472	0.0463387	0.337455	0.439638	0.532365	1	0.308251	0.00713018	0	0	0	0	0.0432278	0.232036	0.163312
0.30071	0.634193	0.515632	0.329868	0.309265	0.245719	0.217527	1	0.665261	0.37769	0.111853	0	0.232655	0.14426	0	0.162411	0.360889	0.921723		0	0	0	0	0	0	0	0	1	0.131579	0	0	0	0	0	0	0	0
0.220976	0.0472511	0.0634318	0.922613	0.101213	0.0882336	0	1	0.502223	0.104444	0.410614	0	0.0796219	0.283442	0.0389549	0.100147	0.259943	0.733239		0	0	0	0	0	0	0	0.195796	1	0.414883	0	0	0	0	0	0	0	0
0.188707	0.0116588	0	0	0	0	0	1	0.792229	0.863231	0	0	0	0	0	0	0	0		0.153112	0.246688	0	0	0	0	0	0.0751039	1	0.244508	0.0283278	0	0	0	0	0	0	0
0.0896588	0.406089	0.807715	0.398627	0.220797	0.265274	0.56841	1	0.383428	0.776421	0.250424	0.20158	0.39254	0.197785	0.367995	0.752238	0.960887	0.28625		0.162471	0.166638	0.0534933	0.00785593	0	0	0	0.092652	1	0.282507	0	0	0	0.162026	0.136923	0	0.0244897	0.0709082
0.183427	0.708157	0	0.268264	0.0811544	0	0	1	0.497602	0	0	0	0	0.551045	0.368377	0	0.0416972	0.164534		0.0967652	0	0	0	0	0	0	0.045523	1	0.159592	0	0	0	0	0	0	0	0
0.834514	0.633101	0.419731	0.819325	0	0	0.63797	1	0.896781	0.447007	0.225519	0.682993	0.747728	0.2647	0	0	0.595948	0.577398		0	0	0	0	0	0	0	0.170948	1	0	0	0	0	0	0	0	0	0
0.558564	0.0270515	0.027576	0	0	0	0	1	0.548883	0.815194	0.138457	0.0162586	0.0117968	0.0749021	0	0.0680629	0.0656233	0.319546		0.312251	0.134989	0	0.215549	0.711313	0	0	0.114937	1	0.399731	0	0.360602	0	0	0	0.473389	0	0.534372
0.0467688	0.0256536	0.0122253	0.0128445	0.179824	0.164838	0.343753	1	0.523056	0.134929	0.113654	0	0	0	0	0	0.0789096	0.00896587		0.146871	0	0	0.0213211	0	0	0.185081	0.439295	1	0.0337961	0.107725	0	0	0	0	0	0	0
0.319551	0.181495	0.0639791	0.0331578	0.312139	0.358874	0.520555	1	0.78864	0.204431	0.0241993	0	0.0235994	0	0	0	0.336803	0.0528447		0.144493	0.121654	0.14922	0.221708	0.0273509	0	0	0.207183	1	0.796705	0.0452122	0	0	0	0.0200636	0.229781	0	0
0.00756035	0.0261606	0.220364	0.229326	0.263472	0.365831	0.738856	1	0.763999	0.418638	0.0243135	0	0	0.104284	0.269003	0.359454	0.20724	0.0622358		0.170133	0.104548	0.162339	0.0529097	0	0	0.0756416	0.161149	1	0.134771	0	0	0	0	0	0.0193482	0	0.105835
0.00797147	0	0.0291529	0.105715	0.212796	0.365134	0.546024	1	0.969611	0.306799	0.107499	0.0585544	0.00683598	0	0	0	0.00935903	0.0354414		0.0155237	0.387258	0.0207026	0	0	0.0474495	0	0.0910741	1	0.928224	0.00869057	0	0	0.0659858	0.0163365	0.522767	0	0.179039
0.097902	0.291874	0.0752441	0	0	0	0	1	0.427262	0.717411	0.236978	0	0	0	0	0.294613	0	0.0279551		0.0639848	0	0.196826	0.0713716	0.660289	0	0.0284831	0.0162408	1	0.0242354	0	0	0	0	0.373942	0.34189	0.0386301	0.0866266
0.63687	0.042631	0.677214	0.356102	0.76235	0.315735	0.229601	1	0.875359	0.285873	0.318267	0.178137	0.386305	0.700254	0.462028	0.598794	0.338377	0.542598		0.0868883	0.0500201	0	0	0	0	0	0.262938	1	0.0105467	0	0	0	0	0	0	0	0.178475
0.383113	0	0	0	0	0	0	1	0.181311	0.0403602	0	0	0	0	0	0	0	0.0104202		0.486635	0.579149	0.214741	0.0555673	0.191562	0.0279309	0.312465	0.206736	1	0.23775	0.232955	0	0	0.258739	0	0.251527	0.0317407	0.187195
0.808653	0.906302	0.662461	0.129937	0.386498	0.0512188	0.714133	1	0.961606	0.569996	0.702183	0.379946	0.041302	0.101668	0.0677783	0.019092	0.297694	0.226577		0	0	0.00301152	0	0	0	0.225185	0.468012	1	0.185395	0.00928506	0	0	0	0	0	0	0
0.29195	0.200601	0.0237348	0	0	0.603274	0.449736	1	0.153452	0.891219	0.041758	0.200067	0.666334	0.586731	0.340696	0.0624609	0.126336	0.0119978		0.120354	0.189514	0.0304252	0.000492103	0	0	0.0642529	0.498681	1	0.693181	0.0764757	0	0	0	0.0547518	0.184164	0.167367	0.159796
0.474144	0.178948	0.355044	0.568782	0.44423	0.341534	0.76857	1	0.267246	0.136001	0.400276	0.337025	0	0	0	0.17147	0.00821812	0.325017		0.268526	0	0.531473	0.00297942	0.138569	0	0	0.139638	1	0.198865	0	0	0	0	0	0	0.0512945	0.391083
0.00799901	0	0	0	0	0	0.13354	1	0.674763	0.0753003	0	0.056799	0	0	0	0	0	0.0057342		0.0493368	0.0609607	0.140941	0.0516339	0.139103	0.43135	0.0553954	0.218896	1	0.220747	0.0196801	0	0	0.0234906	0	0.318649	0.54718	0.202458
0.0400746	0	0	0	0	0	0	1	0.613358	0.378246	0.0937911	0.173474	0	0	0	0	0	0		0.850717	0.585877	0.258648	0.133356	0	0	0.223847	0.377187	1	0.889869	0.695141	0.189027	0	0	0.15477	0.20636	0.064609	0.183641
0.0803851	0.00783316	0	0	0	0.351578	0.703156	1	0.174623	0	0	0.161215	0	0.171008	0	0	0	0.179723		0.279565	0.0813251	0.13519	0.802135	0.448984	0.487758	0.746475	0.993102	1	0.400111	0.344656	0.489967	0.201747	0.735807	0.178611	0.349932	0.254578	0.829879
0.0327413	0.508291	0.850872	0.334895	0.338388	0	0.104009	1	0.889983	0.604613	0.24203	0.334652	0	0	0	0.263053	0.553673	0.247283		0.028203	0.257585	0	0	0	0	0.164915	0.975708	1	0.58969	0.113642	0	0.118592	0	0	0	0	0
0.0286353	0	0.0197571	0.0458254	0.252734	0.108017	0.0748519	1	0.925568	0.509271	0.0557	0	0	0.156353	0.364824	0.179885	0.0548201	0.325533		0.0296332	0	0.230409	0.252326	0.165232	0	0	0.395778	1	0.271751	0.229367	0	0	0	0	0	0.16143	0.251062
0	0	0	0.259265	0.295724	0.221793	0.132958	1	0.836991	0.526085	0	0	0	0	0	0.1631	0.12404	0.577204		0.00998008	0	0	0	0	0.262832	0	0.163181	1	0	0	0	0.0922839	0.167874	0.83937	0.864995	0.065606	0
0.0153377	0.304489	0.0732079	0	0	0	0.271824	1	0.267088	0.0344418	0	0	0	0	0	0.31143	0	0.0711328		0	0	0	0.481831	0.879909	0.0917774	0	0.137264	1	0.988608	0.774609	0.796741	0.820174	0.164035	0	0	0	0.237115
0.936967	0.459428	0.642535	0.997411	0.762801	0.0488083	0.739025	1	0.91338	0.0640556	0	0.206099	0	0	0	0	0.161989	0.0718337		0	0.697604	0.54493	0	0	0	0.272719	0.753565	1	0.488735	0.348847	0.897036	0	0	0	0	0	0
0.0578216	0.420684	0.0190557	0.0502496	0.294287	0.206383	0.123435	1	0.239795	0.0572631	0	0	0	0	0	0.195079	0.0843708	0.0937461		0.047077	0.026442	0.0349845	0	0	0.138931	0.337404	0.563482	1	0.0813843	0	0	0	0.160078	0	0	0	0.0526211
0.116707	0	0	0	0	0	0	1	0.653714	0.0204349	0.99124	0	0.282677	0	0	0	0.240949	0.121145		0.255248	0.0363119	0.336281	0	0	0.372947	0	0.678868	1	0.383255	0.231169	0	0	0	0.54841	0	0	0
0.0245135	0	0.0298433	0.0712187	0.215412	0.67329	0.19692	1	0.439163	0.33432	0.19171	0	0.177495	0.844002	0.984669	0	0.306409	0.191257		0	0.00876537	0.0671338	0	0	0	0	0	1	0.159026	0	0	0	0	0	0.0489846	0	0
0.323812	0	0	0	0	0	0	1	0.0972478	0	0	0	0	0	0	0	0	0		0.32689	0.0721448	0.0277668	0.155594	0.0508868	0	0	0.833547	1	0.0495376	0.794424	0.351277	0.0956588	0	0	0	0	0
0.198604	0.5243	0.230997	0	0.421651	0.0451769	0.0276195	1	0.651505	0.308719	0.263142	0.162367	0.0804241	0.239118	0.0813397	0.156422	0.0625185	0.191975		0.235161	0.0634433	0.0389233	0	0.346344	0	0	0.149819	1	0.1402	0.166554	0.116474	0.0454261	0.0711791	0.0806697	0.0405091	0	0.0997451
0.0106273	0.140932	0.704659	0	0	0.0431389	0.300318	1	0.196789	0.740552	0.0502711	0.3677	0.476648	0	0	0	0	0		0.0176396	0.0152699	0.0206559	0.14955	0.188151	0.121562	0.106267	0.230302	1	0.194109	0.00777284	0	0.0259007	0.026311	0	0.083411	0	0
0.012998	0	0	0	0	0	0.128757	1	0.499092	0.066374	0	0	0	0	0	0	0	0		0	0.00975085	0.069485	0	0.0646836	0.0998387	0.220122	0.562688	1	0.194367	0.208884	0.107426	0	0.122615	0.133573	0.0802549	0	0
0.0813847	0.0997843	0.0985874	0.259082	0.243486	0	0.478718	1	0.635532	0.233587	0.156285	0.50506	0	0	0.204184	0	0.0256715	0.670463		0.00944488	0.0558115	0.0469184	0.13598	0.29535	0.293089	0.118801	0.687276	1	0.277512	0.0703303	0.136119	0.0942072	0.107417	0.129516	0.0718898	0.0370002	0
0.258044	0	0	0	0	0	0.107588	1	0.779398	0.6701	0	0	0	0	0	0	0	0		0	0.0490586	0.0328584	0	0.082238	0.131556	0.291485	0.70516	1	0.217298	0.250724	0.35598	0.186494	0	0	0.108657	0	0
0	0	0	0	0	0	0	1	0.455096	0	0	0	0	0	0	0	0	0.32612		0.0229789	0.400908	0.165043	0.0424137	0.28943	0.235715	0	0.32036	1	0.153052	0.524986	0.399008	0.283866	0	0.142159	0.269542	0.0853102	0
0.182633	0.877323	0.0725539	0	0	0.109179	0.0183772	1	0.441159	0.789296	0.0410084	0	0	0	0	0	0.02158	0.122211		0	0.0379043	0.746941	0.153477	0.618164	0.220773	0.538769	0.866482	1	0.788461	0	0	0.0834521	0	0	0.401801	0.131213	0.0148676
0.186515	0	0.145707	0	0.202878	0	0.149303	1	0.0967394	0.0206539	0	0	0	0	0	0.13941	0.0349449	0.0281512		0.0436924	0.392273	0.261586	0	0.17919	0.0734442	0.457942	0.966176	1	0	0	0	0.0237138	0.0694433	0	0	0	0
0.60597	0	0	0	0	0	0	1	0.347415	0.161166	0	0	0	0	0	0	0	0		0.0340105	0.00740249	0.0856443	0.102882	0.170888	0.0257205	0	0.269732	1	0.362977	0.464349	0.328512	0.0270338	0	0	0.185477	0	0.00438093
0	0	0	0	0	0	0	1	0.15302	0.154505	0	0	0	0	0	0	0	0		0.0365928	0.000765317	0	0	0	0	0.200326	0.276767	1	0.0217128	0	0	0	0	0	0	0	0
0.259369	0	0.469422	0.844986	0	0	0.318116	1	0.709699	0.698772	0	0	0	0	0	0	0	0.610667		0.019732	0.0132809	0	0.0716455	0	0.168946	0	0.51199	1	0.222816	0.1787	0	0	0	0	0.229946	0.0219668	0
0.0384917	0	0	0.00491592	0.0959204	0.105157	0.721428	1	0.185765	0.0247788	0.100727	0.0145362	0.213896	0	0	0	0.031449	0.0132295		0.211672	0.00691457	0.331829	0	0.673631	0.0758721	0	0	1	0.516999	0.64877	0.111218	0.261715	0.224033	0.263058	0.158656	0	0
0.0820317	0	0	0	0	0	0	1	0.140795	0	0	0	0	0	0	0	0	0.363949		0.00753131	0.0038694	0.0453201	0.0629529	0	0.0365429	0.141995	0.3691	1	0.233446	0.538982	0.230345	0.1976	0.0800618	0.0421701	0.34337	0.0230724	0
0.0923808	0	0	0	0	0	0	1	0.822538	0	0	0	0	0	0	0	0	0		0	0.130569	0.0651868	0	0	0	0	0	1	0	0	0	0	0	0	0	0	0
0.0171531	0	0	0	0	0.476083	0.513675	1	0.211187	0	0	0	0	0	0	0	0.0741762	0.815162		0.0729841	0.213044	0.00916773	0	0	0	0	0.575248	1	0.753654	0.842715	0.377103	0.325821	0	0.132422	0	0	0.119332
0.583638	0	0.23588	0	0	0	0	1	0.431365	0.157443	0	0	0	0	0	0.403757	0.108762	0.156699		0	0.00782384	0	0.0772988	0.599082	0.970445	0.825123	0.552976	1	0.596213	0.426437	0.395983	0.373253	0.234059	0.0904556	0.0783413	0	0
0.0444652	0.177259	0.252209	0.57235	0.518343	0.949278	0.89572	1	0.633436	0.931093	0.670046	0.85461	0.324662	0.505144	0.52987	0.306213	0.0204053	0.0131438		0.110703	0.0472864	0	0	0	0	0.115388	0.59338	1	0.873502	0	0.142771	0.120409	0.133781	0	0	0	0
0.230878	0.225327	0.112537	0.0801257	0.331114	0.483433	0.645022	1	0.690255	0.359085	0.666304	0.409688	0.474882	0.260984	0.0796614	0.115193	0.422435	0.645365		0.0361606	0.188083	0.49575	0.222784	0.063166	0.0412135	0.00886834	0.16986	1	0.371845	0.146903	0.225485	0.0693762	0.067822	0.0402797	0.219978	0.133926	0.036009
0.18585	0.697467	0.175111	0	0	0	0.024624	1	0.113079	0.100515	0.461538	0	0	0	0	0	0.0115902	0.0726489		0.319088	0.0221169	0	0	0	0.0431383	0	0	1	0.31444	0	0	0.0548467	0	0	0	0	0.0519403
0.0613314	0.208	0	0.183726	0	0	0	0.288694	1	0.439594	0.524679	0	0.74659	0.449912	0.0599523	0	0.0371729	0		0.534015	0.00946859	0.0504479	0	0	0	0	0.354824	1	0.496209	0	0	0	0	0	0	0	0
0.333535	0.182173	0	0	0.0470018	0.433369	0.0772254	0.0545879	1	0.455185	0.648294	0	0	0.0753203	0.131188	0.744129	0.0140282	0.0734155		0.00276436	0.147912	0.00590823	0	0	0.0733419	0.0344183	0.367218	1	0.0208403	0.32372	0.0929688	0.156023	0.126546	0.0354404	0.0966779	0	0.10375
0.544225	0.314577	0.186717	0.642218	0	0.29531	0.021465	0.0845264	1	0.496899	0.22358	0	0	0.0139502	0.00477874	0.00513897	0.289385	0.0601915		0.00605031	0.000346644	0	0	0	0.0237992	0.092477	0.538502	1	0.231788	0	0	0	0	0	0.044578	0	0
0.300727	0.0606313	0	0	0.162543	0	0.194369	0.0524506	1	0.649763	0.187147	0.137522	0.252171	0.235879	0.0351911	0.00259261	0	0.00782556		0	0.270085	0.468304	0.235621	0	0.0956188	0	0	1	0	0.299061	0.334644	0	0	0	0	0.0412395	0.250579
0.0155145	0.0431172	0.0490039	0	0.28417	0.639382	0.484302	0.023467	1	0.200334	0	0.0694966	0	0.00886047	0.000962525	0.00221698	0.00984681	0.00771423		0.0952478	0.201709	0.129584	0.157474	0.197711	0.24567	0.432646	0.654194	1	0.107525	0	0.188923	0.0200299	0	0.106601	0.0662154	0.0465681	0.136493
0.118064	0.0795147	0.0648871	0	0	0	0	0	1	0.106606	0.955562	0.678431	0	0	0.0352274	0.139377	0.130287	0.535115		0.0210208	0.031892	0	0.0882334	0	0.0311899	0.105197	0.388075	1	0.165753	0.0210984	0.195079	0.265111	0.254038	0.363443	0.376468	0.0366181	0
0.0663717	0.0725714	0.305056	0.373195	0.435394	0	0.654281	0.183631	1	0.660585	0.0858399	0.212745	0.0273655	0.0686016	0.0733673	0.0208876	0.00616568	0.040335		0.0443062	0.022597	0.125512	0	0	0.0632223	0	0.376999	1	0.17899	0.34293	0	0.035318	0	0	0	0	0
0	0.438261	0	0	0	0	0	0	1	0.156617	0	0	0	0.237585	0.104008	0	0.967095	0		0	0.0075509	0	0	0.0886268	0	0	0	1	0	0	0	0	0	0	0	0	0
0.761206	0.0635033	0.673138	0	0	0.560402	0.055081	0.022754	1	0.192547	0	0.386385	0.685878	0.0821781	0.00577643	0.0401552	0.271921	0.635167		0.0637919	0.0736888	0.180183	0	0.37186	0.0633553	0.666194	0.461211	1	0.0432604	0.439722	0.355484	0.0607944	0.111715	0.192085	0.0834334	0	0
0.255323	0.0394663	0	0	0.144051	0.648228	0.0720254	0	1	0.594203	0.238162	0	0	0.108893	0	0	0.0235682	0.0650216		0.0495962	0.0284923	0.145552	0.229716	0.428898	0.229716	0.0178523	0.104308	1	0.478587	0.636234	0.33565	0.0444135	0.0671355	0.128614	0.182103	0.0419123	0.0323815
0.154449	0.110212	0.2005	0.306254	0.302328	0.0709304	0.556686	0.398216	1	0.740082	0.289417	0.248649	0.414004	0.110705	0.29619	0.343326	0.179797	0.115918		0.218381	0.260148	0.237771	0.151574	0.226597	0.0348743	0	0.619575	1	0.0922036	0.239424	0.605779	0.156941	0	0.228078	0.0645025	0	0.0418852
0.266519	0.282832	0.212535	0.271874	0.981495	0.70857	0.0219969	0.163732	1	0.329797	0.0742943	0.616303	0.262825	0.078321	0.0148579	0.00590075	0.00989047	0.00986073		0.0555222	0.191334	0.209444	0.240337	0.247793	0	0.306024	0.18791	1	0.784914	0.430161	0.110613	0	0	0	0	0	0.475955
0	0	0	0	0	0	0	0	1	0	0	0	0	0	0	0	0	0		0.00324237	0.0115773	0	0	0	0.0118125	0.174132	0.221043	1	0.386953	0.0845564	0	0	0	0	0.163367	0	0
0.474315	0.105195	0	0	0	0	0	0.111788	1	0.289191	0.451136	0	0.264454	0.411291	0.0450737	0.00493887	0	0		0.141373	0.0433898	0.0743043	0.148058	0.19547	0.0164509	0	0.0723494	1	0.300304	0	0	0	0	0.228097	0.342157	0	0
0.0845894	0.446051	0	0	0	0	0.0770462	0.0357146	1	0.956387	0.38685	0.183842	0	0.0141671	0.173579	0.747772	0.407142	0.108091		0	0	0.160226	0	0	0	0.574996	0.73872	1	0.0585928	0	0	0	0	0	0	0	0
0.213567	0.0798464	0	0	0	0	0	0	1	0.408086	0.395298	0	0.47181	0.205633	0.011937	0.0692494	0.035091	0.827535		0.0106911	0.382064	0.00791521	0	0	0.350928	0.315077	0.816688	1	0.0624782	0	0.141723	0.457462	0.062059	0	0.244218	0	0.0981732
0	0	0	0	0	0	0	0	1	0.296556	0	0	0	0	0	0	0	0.742728		0	0.00907879	0.105158	0	0.121757	0.0901903	0.609344	0.823587	1	0.105912	0.0213973	0.0147364	0	0	0	0	0	0
0.144542	0.0501791	0.302797	0.213176	0.2063	0	0.349169	0.0970028	1	0.0960995	0.176029	0.00297609	0.0585509	0.121082	0.0338354	0.0122497	0	0		0	0.0593018	0.0159139	0	0	0.0722276	0.256748	0.633119	1	0.189913	0.00910925	0.137555	0.185039	0	0.252708	0.36043	0	0
0.236675	0.010887	0.0384333	0.0437021	0.416733	0	0.279853	0.164423	1	0.749652	0.0306986	0.27298	0.0195881	0	0.0889227	0.0889058	0.0969316	0.193968		0.788623	0.112179	0.159911	0.0626214	0	0.710584	0.888229	0.333086	0.850699	1	0	0	0.506154	0	0.0255976	0	0.065208	0.798035
0.765221	0.10228	0.200557	0.00635387	0	0	0	0.713586	1	0.786721	0.00621574	0.18309	0.029681	0	0.00210676	0.139061	0	0		0.0446867	0	0	0.284657	0.0498149	0	0	0	0.23515	1	0.0778217	0.0495229	0.0522233	0	0	0	0	0.0301946
0.515576	0.289386	0.878397	0.232994	0.0475247	0	0.0290811	0.0867943	1	0.158257	0.0983619	0.0866003	0.338079	0	0.573287	0.95675	0.279231	0		0.0500807	0	0.426174	0	0.0416167	0	0	0	0.839005	1	0	0	0	0	0.461292	0.167742	0	0.257148
0.0518199	0.101337	0	0.0288788	0	0	0	0.335324	1	0.758652	0.43705	0.0684747	0	0	0.00334788	0.0194724	0	0		0.147958	0.163261	0	0	0	0	0	0	0.319626	1	0.0397491	0.0165621	0	0	0	0	0.0423614	0.286022
0.6142	0.0831051	0.711717	0.518961	0	0	0	0.501114	1	0.603856	0.00529226	0.0462887	0	0	0.0520853	0.0441556	0.0736321	0.182381		0.0744501	0	0	0.0663316	0	0	0	0	0.588819	1	0.119229	0	0	0	0	0	0	0.0819911
0.0723926	0.0263676	0.0279221	0.0182682	0.520049	0.693002	0.430404	0.769144	1	0.21042	0	0.150037	0.824264	0.439608	0	0.048298	0.130414	0.68003		0.190574	0.143435	0.00558576	0	0	0	0	0	0.812056	1	0.229246	0.0225778	0.127003	0.12192	0.0468923	0.06096	0.008128	0.275713
0.276199	0.00651872	0.28158	0.281917	0.165157	0	0.248311	0.993205	1	0.713138	0.583584	0.105072	0.00469931	0	0	0.0460063	0	0		0.282482	0.243579	0.44429	0.852104	0.749679	0.749679	0	0	0.133388	1	0.878338	0.0624433	0	0	0.0297755	0.0906754	0.217621	0.148753
0.180812	0.0434299	0.395654	0.369434	0.704447	0.894918	0.758074	0.210604	1	0.218355	0.00508635	0	0	0.205791	0.707375	0.0705988	0.0355336	0		0.0393777	0.0195569	0.128531	0	0	0	0	0	0.741066	1	0.0433926	0.0067102	0.0278732	0.0362351	0.0246975	0.0181176	0.00241567	0.191141
0	0.109973	0	0	0	0	0	0.462899	1	0.797582	0.170961	0.0983538	0.104473	0	0.290327	0.0500897	0	0		0.783545	0.216949	0.356512	0.351967	0.834634	0.97374	0	0	0.667637	1	0.226097	0	0	0	0	0	0	0.0120976
0.964142	0.0738038	0	0	0.211117	0	0	0.566148	1	0.397894	0.0211504	0	0.199846	0.569454	0.331428	0	0	0		0.0157442	0.0972069	0	0	0	0	0	0	0.529708	1	0	0	0	0	0	0	0	0.254923
0.371439	0	0	0	0	0	0	0.0916384	1	0	0.09935	0.503236	0.048518	0	0.039789	0.246935	0	0.176143		0.281062	0.15353	0	0	0	0	0	0.374842	0.906145	1	0.027419	0.0152328	0.0875164	0.0822571	0.0316373	0.0411285	0.00548381	0.124545
0.161709	0	0.0323306	0.0627963	0	0.210386	0	0.298885	1	0.81924	0.0285118	0.00610439	0	0	0.0123321	0.0052049	0	0.0206202		0.34431	0.467934	0.370014	0.447362	0.23636	0.418017	0.0568258	0.142064	0.875843	1	0.0271705	0.0150947	0.0757065	0.0815115	0.0313506	0.10046	0.0111202	0.242013
0.635231	0.190352	0	0.421513	0	0	0	0.360856	1	0.536533	0.0196701	0	0	0	0	0	0	0.401876		0.260124	0.806903	0.726033	0.868367	0.172813	0	0	0.301631	0.467427	1	0.352083	0	0.0393256	0.50594	0.317615	0.0938371	0.0039665	0.179276
0	0	0.0871175	0.367527	0.0289275	0.450708	0	0.146091	1	0.0953762	0.0643688	0	0.000337113	0	0	0.00574381	0	0		0.243314	0.0892804	0	0.234667	0	0	0	0	0.793553	1	0.1529	0	0	0	0	0	0.109696	0.0462822
0.10262	0	0.331068	0.0163289	0	0	0.545654	0.611891	1	0.373367	0.340447	0.154244	0.165224	0	0	6.27223e-05	0	0		0.0711902	0.257436	0.112785	0.0815908	0	0	0	0.332453	0.660967	1	0.0300802	0	0	0	0	0	0	0
0	0.0402191	0.0276545	0.00924008	0	0	0.035329	0.912705	1	0.304964	0.0102136	0	0	0	0.00376126	0.0249672	0.0666565	0.0195067		0.22361	0.18827	0	0	0	0.200466	0	0	0.779049	1	0.236215	0.480169	0.27867	0	0	0	0	0.0100774
0.183394	0.295101	0	0.0305889	0	0.246721	0	0.224171	1	0.961186	0.102848	0.124133	0.0143407	0	0	0.0666727	0.0433901	0		0.0458739	0	0	0	0	0	0	0	0.147302	1	0	0	0	0	0	0	0	0.31056
0	0	0.32228	0.0916339	0.43068	0	0	0.110354	1	0.396381	0.435098	0.712453	0.535197	0.536512	0.000878803	0.0371734	0	0		0	0	0	0.091269	0	0	0	0	0.714164	1	0	0	0	0	0.041571	0	0	0
0.314479	0.152303	0.208762	0	0	0	0.379461	0.244715	1	0.33422	0.0153071	0	0	0	0	0.00616476	0	0		0.117062	0.207272	0.0431126	0	0	0	0	0	0.137253	1	0	0	0	0	0	0	0	0
0	0.0246252	0.0613639	0	0.176257	0.0215425	0	0.134808	1	0.521702	0.169923	0	0	0	0.273912	0.610362	0.283842	0.148038		0	0.0708666	0.0365499	0	0	0	0	0	0.508584	1	0.245592	0	0	0.269577	0	0	0	0.132076
0	0	0	0.0288659	0	0.0232585	0	0	1	0.445937	0.624764	0.0931959	0	0	0	0	0	0.411658		0.102303	0.668239	0	0.132722	0.159758	0	0	0	0.187518	1	0.19044	0	0	0	0.0368064	0	0.0599117	0
0.660896	0.0393046	0.639771	0.824088	0.350851	0.227733	0.296259	0.654458	1	0.873187	0.340258	0.106898	0.18914	0.251599	0.18308	0	0.0236946	0.289115		0.288534	0	0	0	0	0	0	0	0.541027	1	0	0	0	0	0	0	0	0
0.44743	0.0322436	0.384607	0	0.0493953	0.395163	0.246526	0.604075	1	0.517535	0.150199	0.0199799	0.0243152	0.104948	0.153128	0	0	0.302486		0.548288	0.0651023	0	0.178744	0	0	0	0	0.319144	1	0	0	0	0	0	0	0.0415414	0.250221
0.255818	0.285765	0.0253816	0	0	0.0195445	0.243782	0.151665	1	0.121345	0.121224	0.539744	0.0205132	0	0.057632	0.190709	0	0.19709		0.180432	0	0	0	0	0	0	0	0.640519	1	0	0	0	0	0	0	0	0
0.131985	0.671833	0.162671	0.0488795	0	0.287002	0.256845	0.479161	1	0.505771	0.191119	0.201939	0.0981038	0.314885	0.798445	0.0917442	0	0.246584		0.050054	0.0107938	0	0	0	0	0	0	0.043381	1	0	0	0	0	0	0	0	0.0864801
0.112276	0.253954	0.360043	0.382552	0.510069	0	0.0895971	0.302601	1	0.225314	0	0.907271	0	0	0	0	0	0.073175		0.993062	0.0862814	0	0.532815	0	0	0	0	0.643695	1	0	0	0.525303	0.502681	0	0	0	0.316117
0.0439059	0.0237079	0.248427	0.673126	0.393306	0.0732752	0.215916	0.974384	1	0.634556	0.366588	0.467335	0.506791	0.910513	0.754628	0.463021	0.587304	0.884335		0.076747	0	0	0	0	0	0.217925	0.0402193	0.713964	1	0	0	0.0689567	0	0	0	0	0
0	0.520183	0	0	0	0	0	0.180293	1	0.623613	0.141953	0	0	0	0	0	0	0		0.804808	0.0480383	0	0	0.126716	0	0	0	0.421653	1	0	0	0	0	0	0	0	0.337943
0	0	0	0	0	0	0	0.885217	1	0.66199	0	0	0	0	0.0874819	0	0.179216	0.0411855		0	0	0	0	0	0	0	0	0.926448	1	0	0	0.0144228	0	0	0	0	0
0.162518	0.218296	0.253486	0.230424	0.270322	0	0.253804	0.664199	1	0.204038	0	0	0	0.293374	0.217314	0	0	0		0.0731925	0.00932841	0	0.0332296	0	0.325862	0.325862	0.128207	0.668021	1	0	0	0.119795	0.199658	0.0946001	0.0848853	0.0299901	0.145021
0	0	0	0.325778	0	0	0	0	1	0.288957	0	0	0	0	0.293665	0	0	0		0.487619	0	0	0.343052	0	0	0	0	0.721708	1	0	0	0	0	0	0	0	0.480613
0.10238	0	0	0	0	0.00387851	0.116956	0.393118	1	0.588062	0.0328792	0.140558	0	0	0	0	0	0		0.290517	0.0132981	0.230991	0.279273	0.216104	0	0	0	0.49257	1	0.178948	0	0	0	0	0	0	0
0.499092	0.0741844	0.026989	0	0.101357	0.00976013	0	0.213805	1	0.565269	0	0.0393287	0.184845	0	0	0	0	0.192672		0.184623	0.0714072	0	0	0	0	0	0	0.618108	1	0.160975	0	0	0	0	0	0	0
0.420904	0.0926906	0	0	0	0.0393112	0.587922	0	1	0.471268	0.12664	0	0	0	0.0889601	0	0	0.161896		0.0519569	0	0	0.0218696	0.0592301	0	0	0.167677	0.0416876	1	0.322203	0	0	0	0	0	0	0.290446
0.633203	0	0	0	0.0105968	0.00574309	0	0	1	0.426108	0.0270547	0	0	0	0	0	0	0.0710739		0.0519088	0	0	0	0	0	0	0	0.592477	1	0	0	0	0	0	0	0	0.0170695
0.167574	0	0.202892	0.149026	0	0	0.052388	0.699762	1	0.305214	0.0221725	0	0	0	0	0	0	0.0502241		0.338005	0	0.0341526	0.87227	0.557879	0	0.552505	0.354489	0.463428	1	0.844442	0.146639	0	0.586635	0.814771	0.407871	0.660362	0.489202
0.16525	0.016006	0	0.0416945	0	0	0.101321	0.510997	1	0.589385	0.0193677	0	0	0.158357	0	0	0	0.0115955		0.847715	0.777413	0	0.540104	0.297881	0.384124	0.0664882	0.160012	0.924429	1	0.148958	0.243233	0	0	0.0320866	0	0	0.823658
0	0	0	0	0	0	0.67318	0.441599	1	0.781396	0	0	0	0	0	0	0	0		0.16639	0.76597	0.759892	0.343972	0.561657	0.78406	0	0	0.504714	1	0.521935	0.564395	0	0	0.350312	0.168039	0.00710406	0.0745318
0	0	0	0	0.310343	0	0	0	1	0	0	0	0	0	0	0	0	0		0.363532	0.669439	0.856297	0.543248	0.0082357	0	0.453544	0.289716	0.600689	1	0.283483	0.111589	0.264108	0	0.273641	0.216994	0.158014	0.661317
0	0.0349905	0	0	0.77308	0	0	0.286669	1	0.591469	0	0	0	0	0.961527	0	0	0		0.402856	0.723073	0.353928	0.27597	0.047867	0	0.371524	0	0.654503	1	0.258464	0	0	0	0	0	0.62828	0.639585
0	0.0121621	0	0	0	0	0	0.347898	1	0.178542	0	0	0	0.10238	0	0.0386343	0	0.0214194		0	0	0	0.160571	0.0688926	0	0	0	0.645045	1	0.234983	0.517644	0	0	0	0.306998	0	0
0.0478136	0.580588	0	0	0	0	0.331045	0.512972	1	0.667829	0	0	0	0	0	0	0	0.410699		0.187749	0	0	0.546801	0.0593573	0.226244	0.7319	0.194048	0.683497	1	0.416694	0.0751767	0	0	0	0	0	0
0.0752181	0.0521297	0	0.185422	0	0.0421818	0	0.696072	1	0.349306	0	0	0	0.167335	0.299958	0.171869	0.361681	0.484215		0	0.182613	0.377715	0.281012	0.0829848	0.842313	0.722002	0.489176	0.723855	1	0.118173	0	0	0	0	0	0	0
0	0	0	0	0	0	0	0	1	0.263282	0	0	0	0	0	0	0	0		0.756484	0.797283	0	0.263922	0.0297839	0	0	0	0.889445	1	0.38946	0.0678056	0	0	0	0	0	0.523729
0.0956302	0.57912	0.432847	0.713853	0.118642	0.047656	0.174278	0.669872	1	0.116821	0.107759	0.0845494	0	0	0	0.157154	0.313175	0.601942		0	0.801548	0	0.0358137	0	0.250972	0	0	0.456285	1	0.0821303	0	0	0	0	0	0	0
0.00619088	0	0.00625666	0	0	0	0.575662	0.697878	1	0.380014	0.367506	0.0809833	0.4859	0.316783	0.199695	0.60489	0.611877	0.212198		0.558467	0.112871	0	0.0222395	0.358072	0.494444	0.420299	0	0.8594	1	0.633775	0.543689	0	0	0.152748	0.110973	0.122291	0.0751168
0	0	0	0	0.108091	0	0	0.570122	1	0.125688	0	0	0	0	0	0	0.076933	0.528024		0.346567	0.0739435	0.0465844	0.0913861	0	0	0	0	0.345817	1	0	0	0	0	0	0	0	0.102186
0	0.407261	0	0	0.949951	0	0	0	1	0.311111	0	0	0	0	0.148301	0	0.132992	0.611365		0	0.671379	0.438118	0	0	0.868694	0.106995	0.0423435	0.86339	1	0.326501	0.182794	0.275316	0.0218142	0	0.0941885	0	0.0461546
0.180938	0	0	0	0	0.235632	0.412356	0.536771	1	0.912707	0.152069	0	0	0.0917602	0	0	0	0.675163		0.521165	0.473181	0.304611	0.416784	0.463581	0.82798	0.681097	0.881601	0.560349	1	0.627024	0.960359	0.909861	0.368088	0.656394	0.304171	0.130905	0.260202
0.548118	0.800627	0	0	0	0	0	0	1	0.0765601	0.339952	0	0	0	0	0	0.0583691	0.479599		0.0918748	0.0332973	0.105832	0.248976	0.0726156	0.0431943	0.0770228	0.110568	0.876957	1	0.147328	0.0449384	0.152676	0.115159	0.0147435	0.0540129	0.032709	0.103148
0.0826469	0	0	0	0.280722	0.257329	0.257329	0.591821	1	0.412405	0.247596	0.181061	0	0	0.0118814	0.108324	0.0979852	0		0.20016	0.164347	0.338177	0.374002	0.288627	0.0259755	0.0151973	0.179991	0.245971	1	0.90761	0.389473	0.344848	0.350949	0.223381	0.0952704	0.0670404	0.165003
0.0952995	0.0251121	0.127012	0.0391084	0	0	0	0.474492	1	0.822855	0.170961	0.0145988	0.0531318	0.0624784	0	0.0346895	0.0731955	0.00610663		0.154323	0	0	0	0	0	0	0	0.444054	1	0	0.0241492	0.311469	0	0.588028	0	0	0.161195
0.0200811	0	0	0.30237	0.566943	0	0	0.989724	1	0	0.0204131	0	0	0	0	0	0	0.0752872		0.200511	0.0513078	0.125602	0.132416	0.0249977	0.123592	0.118009	0.132736	0.309076	1	0.346047	0.150056	0.227614	0.131559	0.0540267	0.606064	0.217977	0.360953
0.0158282	0	0	0	0	0	0	0.361432	1	0.551057	0.194566	0	0	0	0	0	0	0.050447		0.186352	0.0630183	0.00517536	0	0.484776	0.395923	0.475759	0.282755	0.632007	1	0.341054	0.139065	0.284105	0.058205	0.108699	0.373647	0.168903	0.223651
0.141114	0.213353	0	0.0299621	0.167788	0.153805	0.0512684	0.498214	1	0.301125	0.198697	0.132139	0.191178	0.0222987	0	0	0	0.00914226		0.445539	0.491358	0.304225	0.349121	0.214888	0.0352836	0	0.297166	0.685092	1	0.819395	0.322286	0.150145	0.257728	0.209157	0.139583	0.370856	0.233622
0.239114	0.370801	0.26742	0	0	0	0	0.103318	1	0.43482	0.0256466	0.0649927	0	0.0986213	0	0	0	0.0937001		0.129686	0.014325	0.0556104	0.174613	0.162217	0.0316426	0.0327622	0.0581548	0.771129	1	0	0.0217943	0.085942	0.00663947	0	0.0143128	0.240597	0.160902
0	0	0.0144997	0	0	0	0	0.222821	1	0.74214	0	0.129331	0	0	0	0	0	0.0522158		0.301707	0.163941	0.123892	0.45731	0.205925	0.020653	0	0.102513	0.589632	1	0.23543	0.067361	0.709904	0.0539522	0	0.0105103	0.00107999	0.00358668
0.154037	0.0403442	0.0676167	0.102828	0.144504	0.0670932	0	0.627059	1	0.905527	0.047984	0.206648	0.133651	0.0149412	0	0	0	0.037865		0.0930688	0	0.139708	0	0	0	0	0.351814	0.187501	1	0	0.427808	0	0	0	0	0	0
0.586789	0.530553	0	0	0	0	0	0.257965	1	0	0.0611332	0.30423	0.297892	0	0	0	0	0.909912		0.141936	0.162965	0.264465	0.608848	0.370202	0.162085	0.545107	0.399399	0.661608	1	0.943382	0.925501	0.632557	0.460109	0.286802	0.390837	0.261796	0.12664
0.0102024	0.0682475	0.029545	0.00567191	0.0756255	0.0693233	0.291471	0.470624	1	0.251322	0	0.107927	0	0.0912951	0	0.00450356	0.06512	0		0.310592	0.147194	0	0.244917	0.280646	0.0676983	0.0838998	0.044864	0.676379	1	0.319529	0.132095	0.126136	0	0	0.0233169	0.00597005	0.268556
0.0448808	0	0	0	0	0	0	0.397611	1	0.361464	0	0.168724	0	0	0	0	0	0		0.241749	0.0730843	0.11657	0.21994	0.41619	0.0751174	0.727053	0.170627	0.525226	1	0.442035	0.180802	0.332765	0.180195	0.398406	0.509355	0.205088	0.512409
0.00917526	0.00387402	0.147952	0	0	0	0	0	1	0.970551	0.0645546	0	0	0	0	0.0164001	0.111196	0.0136385		0	0	0	0	0	0	0	0	0	1	0.21971	0	0	0	0.035359	0.0805294	0.254961	0.0931275
0	0	0	0	0	0	0.135633	0.545265	1	0.231252	0	0.135098	0	0	0	0	0	0		0	0.47451	0.712377	0.0393161	0	0.467991	0.316232	0.103679	0.464758	1	0.805465	0	0	0.132478	0	0.15693	0.00189696	0.936384
0	0	0.0168401	0.495984	0.556389	0	0	0.464684	1	0.0243778	0.203056	0.420221	0	0	0	0	0.0422279	0.415214		0.125942	0	0.513726	0.714113	0	0.110865	0	0	0	1	0.0715048	0	0	0	0.0204115	0.0811416	0.0327471	0.327235
0.0499352	0	0	0	0	0	0	0.12538	1	0.304334	0	0.0967833	0	0	0	0	0	0.00326938		0	0	0	0	0	0	0	0	0.292901	1	0	0	0	0	0.164409	0.0292509	0.18846	0
0.770217	0	0.417289	0	0	0	0	0	1	0.508444	0	0	0	0	0	0	0.522773	0.774463		0.44384	0.349097	0	0.0684056	0.506401	0.63934	0.243354	0.409642	0.777617	1	0.608536	0.669495	0.723294	0.396644	0.175531	0.179246	0.749039	0.448552
0.311232	0.285518	0	0	0	0	0	0	1	0.741778	0.0653791	0	0	0	0	0	0.516971	0.116101		0.514537	0	0	0	0	0	0	0	0.0892857	1	1	0	0	0	0	0	0.123963	0.23674
0.980544	0.221123	0.0539185	0.626937	0.615539	0.323265	0.344816	0	1	0	0.226187	0.497255	0	0	0	0	0	0.411072		0.0892146	0	0	0	0.0620282	0.182719	0.367436	0.337433	0.582457	1	0.442639	0.191928	0.236296	0.145484	0	0	0.0599271	0.0493527
0.176514	0.751235	0	0	0	0	0	0.198128	1	0.799401	0.208414	0.111381	0	0	0	0	0	0.429022		0.409183	0.088453	0	0	0	0	0.110363	0.551816	0.779929	1	0.417121	0.0919424	0.105746	0	0	0	0.375732	0.368789
0.808545	0.317375	0.32399	0	0	0	0	0	1	0.790045	0	0	0	0	0	0	0	0.0170029		0.24148	0.739093	0.0408933	0.269862	0.44472	0.639251	0.678102	0.489327	0.339042	1	0.321687	0.281091	0.0149064	0.495362	0.225805	0.180644	0.380089	0.353008
0.00231301	0	0	0	0	0	0	0.0441087	1	0.60545	0.00381291	0.334213	0	0	0	0	0	0.00367059		0.324745	0	0	0.0342746	0.270263	0	0	0	0	1	0.341761	0	0	0.0416118	0.101186	0.445218	0.189933	0.245208
0.187211	0.105602	0.246579	0	0	0	0	0	1	0.382706	0.0505656	0.077294	0	0.123269	0.289122	0.742088	0.470591	0.0234927		0.131638	0.0223366	0.0604733	0.169818	0.101316	0.0489612	0.260995	0.163772	0.22154	1	0.645615	0.400764	0.767784	0.657903	0.53888	0.498094	0.875838	0.417192
0	0	0	0	0	0	0	0.0952612	1	0.528396	0.0174912	0.984024	0	0	0	0	0	0		0.040904	0.00856783	0	0.0212732	0.300124	0.0333471	0.0120314	0	0.196973	1	0.900996	0.0735367	0	0	0.0709726	0.212918	0.47287	0.166735
0.0472269	0.00999191	0.134794	0	0	0	0	0.0973996	1	0.697301	0.590915	0.631432	0.252573	0	0.261962	0.0122828	0.331851	0.124548		0.0477519	0.0140709	0	0	0.0183133	0.232315	0.261842	0.0872807	0.0873348	1	0.0157594	0	0	0	0	0.134306	0.326906	0.171889
0.113031	0	0.253568	0	0	0	0	0	1	0.0936872	0	0	0	0	0	0	0	0.0454116		0.0372926	0	0	0.324536	0.421019	0.0526274	0.135324	0.377634	0.267812	1	0.816781	0.340246	0.297582	0.0295747	0	0	0.0599474	0.404583
0.0144174	0.0611821	0	0	0	0	0.437905	0.698398	1	0.388699	0.0155463	0.0339057	0	0	0	0	0.168001	0.114644		0.114276	0.341918	0.0785735	0.0910716	0.207601	0.152419	0	0	0.67047	1	0.492174	0.500847	0.302019	0.465113	0.543943	0.278222	0.898962	0.886967
0.691993	0.0958817	0.149898	0.241514	0	0	0	0.624115	1	0.87854	0.0632088	0.0417352	0.333882	0	0	0	0	0		0	0	0	0	0	0	0	0	0	1	0	0	0	0	0	0	0	0.481639
0.0690213	0	0	0	0	0.264402	0.693778	0.576261	1	0.541354	0	0	0	0	0	0	0.254258	0.0383914		0.0777078	0.129032	0	0	0	0	0	0.0556961	0.695162	1	0	0	0	0	0	0	0	0.86109
0.0166103	0	0	0	0	0	0.549307	0.151086	1	0.304079	0	0	0	0	0	0	0.39656	0.120859		0.483546	0.0975663	0.155421	0.254908	0.370251	0.00370797	0	0.128103	0.201359	1	0.523525	0	0.386771	0.121567	0.321632	0.275684	0.0626019	0.191148
0.085208	0	0	0	0.114164	0.208756	0	0.12509	1	0.171364	0	0	0	0	0	0	0.26416	0.466883		0.339072	0.412036	0.0408409	0.0056563	0.317592	0	0	0.0272572	0.487342	1	0.545581	0	0	0	0.269708	0.359611	0.296969	0.0760262
0.404583	0.46506	0	0	0	0	0	0.395633	1	0.964328	0.0625592	0.688913	0.265536	0	0.143215	0.226925	0.200828	0.0891112		0.135521	0.449271	0.181225	0	0.0456223	0	0	0.182855	0.882303	1	0.461726	0	0	0.0509538	0.307707	0.316325	0.314219	0.305623
0.0112387	0	0.324337	0.404653	0.107254	0.110135	0.882384	0.744379	1	0.580389	0.0250707	0	0.810671	0.249412	0.108074	0.0791754	0.24132	0.515212		0.0700437	0	0.00373287	0.0704667	0.985628	0.705615	0.583445	0.598875	0.66776	1	0.612184	0.161642	0.0537335	0	0.081191	0	0.00545648	0.0873726
0.00433404	0	0	0	0	0	0	0.201879	1	0.116658	0	0	0	0	0	0	0.139269	0.142274		0	0.345303	0.132607	0.871803	0.368409	0.168838	0.506471	0.386648	0.752353	1	0.58146	0.069395	0	0	0	0.405552	0.473484	0.42836
0.666828	0	0	0	0	0	0	0	1	0.424164	0	0	0	0	0	0	0	0.98772		0.977435	0.963989	0.176876	0.0049996	0.355856	0	0.257215	0.562962	0.419792	1	0.540304	0	0	0	0.273578	0.595248	0.551696	0.931085
0.0485502	0	0	0	0	0	0.0920586	0.0375807	1	0.975739	0.00771629	0.451403	0	0	0	0	0.0680342	0.160437		0	0	0	0	0	0	0	0	0	1	0	0	0	0	0	0	0	0
0.0432504	0.656232	0.138081	0.207116	0.569569	0.0488202	0.00688806	0.520169	1	0.426132	0	0	0	0	0	0	0.265389	0.0837949		0.521972	0.770755	0.181066	0.320177	0.362587	0.0617005	0	0	0.176773	1	0.794312	0	0	0.198858	0.361073	0.257909	0	0.0786543
0.0273304	0	0	0	0	0.393284	0.54064	0.970988	1	0.167999	0	0	0	0	0	0	0.048877	0.170995		0	0	0.155724	0.437896	0	0.687726	0.143419	0.404998	0.727379	1	0.285714	0	0	0	0	0	0	0.484223
0	0	0	0	0	0	0	0	1	0.149929	0	0	0	0	0	0	0	0.0571849		0.932428	0.820658	0.117214	0.0570224	0	0	0.0311678	0.270045	0.474995	1	0.454377	0.0851028	0.0113314	0	0	0.249391	0.236689	0.282192
0	0	0	0	0	0	0	0.289402	1	0.0466436	0	0	0	0	0	0	0	0.0429898		0.0531703	0	0	0	0	0	0	0	0.860334	1	0	0	0	0	0	0	0	0.0507836
0.277608	0	0	0.0267976	0.522879	0	0	0.228298	1	0.136757	0	0	0	0	0	0	0	0.0475499		0	0	0	0	0	0	0	0	0	1	0	0	0	0	0	0	0	0
0.234829	0.538726	0	0	0	0	0	0.536421	1	0.204463	0	0	0	0	0	0	0.00524528	0.880257		0	0	0.0062476	0	0.297088	0.466448	0	0	0.207575	1	0	0	0	0	0	0.106506	0	0
0.108588	0	0	0	0	0	0.111113	0	1	0.486111	0	0	0	0	0	0.530152	0.161794	0		0.0311199	0.0431612	0.0565091	0.00421657	0.0604376	0.0798945	0.0894169	0.317682	0.787564	1	0.319262	0	0.0194967	0	0.0140231	0.102389	0.0179881	0
0.037426	0	0.337246	0	0	0	0	0.586609	1	0.0516696	0	0	0	0	0	0	0	0		0.641813	0.144241	0.0377206	0.115353	0.314368	0.0708711	0.306207	0.439659	0.123789	1	0.777194	0.371315	0.218082	0	0.203228	0.203972	0	0
0.0738611	0.411974	0.00930809	0.50393	0.573579	0.495883	0	0.549933	1	0.588317	0.234677	0.711576	0.180336	0.357452	0.598709	0	0	0.796798		0.0306471	0.036404	0	0	0	0	0	0	0.499334	0.477861	1	0	0	0	0	0	0	0.147174
0.0259049	0	0	0	0	0.15426	0.00952288	0.614107	1	0.332082	0	0	0	0	0	0.128327	0.01331	0.0810581		0.658076	0.0827776	0.271444	0.445116	0.0753451	0	0.102251	0.297391	0.426278	0.921648	1	0	0	0	0	0.172211	0.590438	0.671132
0.150407	0	0	0	0	0	0.0187915	0.375374	1	0.139424	0	0	0	0	0	0	0.0330263	0.0805081		0.618631	0.523997	0.235392	0.15129	0.15129	0.172931	0.126124	0	0	0.162504	1	0.330339	0.018565	0.0310613	0	0.316215	0.129212	0.654895
0.0414203	0.574061	0.121007	0	0	0	0.00547908	0.236683	1	0.0832965	0.0731022	0	0	0	0.0787062	0.0927609	0.111141	0.256948		0.177222	0	0	0.879732	0.128294	0	0	0	0.594697	0.82441	1	0.0700925	0.270076	0	0	0	0	0
0	0	0	0	0	0	0	0	1	0.951795	0	0	0	0	0.807777	0	0.196049	0.768912		0.0207574	0.110739	0.0430084	0.0609603	0	0	0	0	0.205736	0.185274	1	0	0	0	0	0	0	0.102787
0	0	0	0	0	0	0	0.482836	1	0	0	0	0	0	0	0	0	0		0.0633973	0.531315	0.552026	0.655042	0.552026	0.552026	0	0	0.328977	0.774665	1	0.954539	0.21212	0	0.143158	0.0458105	0	0
0.312816	0.00976196	0	0	0	0.0677995	0.0885161	0.481562	1	0.60544	0.906116	0.0299164	0.393172	0.644368	0.690596	0.524631	0.008925	0.274181		0.565911	0.71933	0.290171	0	0.0357463	0.24656	0	0	0.323318	0.213955	1	0.17782	0.801647	0.916168	0.0763474	0.386322	0.607626	0.486103
0.138959	0.631465	0	0	0	0.462593	0.0443099	0.215884	1	0.484457	0.27452	0.319332	0.0506652	0.0537654	0.553947	0.371783	0.3089	0.411805		0	0	0	0	0.0969671	0.793367	0	0	0	0	1	0	0	0	0	0	0	0
0.195397	0.0582848	0	0.0561851	0.144351	0.0825508	0	0.110812	1	0.594383	0.074095	0.107997	0.445432	0.286306	0.485807	0.051723	0.152967	0.10884		0.329291	0.105786	0.54193	0.562931	0.22912	0.752205	0.699804	0.465587	0.249553	0.895482	1	0.377694	0.277459	0.335353	0.257166	0.287421	0.22708	0.735019
0.0842927	0.139874	0.261044	0.231629	0.504848	0.517973	0.98567	0.879057	1	0.550463	0.411942	0.169306	0.300301	0.0135031	0.00608181	0.0173387	0.0694038	0.106457		0.380687	0.517512	0.144874	0.430113	0.577998	0.426399	0.341118	0.116038	0.309602	0.29331	1	0.559755	0.0787745	0.0847755	0.145373	0.135655	0.0597	0.0967668
0.345201	0	0	0	0	0.315025	0.919676	0.262535	1	0.99064	0.773691	0.370117	0.0541774	0.0147378	0.511903	0.437379	0.233932	0.963929		0.248192	0.136483	0.189933	0.126405	0.0884101	0.15962	0.187007	0	0.56248	0.172971	1	0.581439	0.679968	0.639027	0.305947	0.107889	0	0.0325398
0.340047	0.135346	0	0	0	0.104374	0.498296	0.563115	1	0.315068	0.389826	0.778647	0.669391	0.710951	0.738176	0.754619	0.0489609	0.358073		0.469286	0.0163195	0.20147	0.506377	0.452057	0.545861	0.228999	0	0.105303	0.63713	1	0.286125	0.221858	0.25858	0.1061	0.151002	0.0966449	0.465939
0.106444	0	0	0.121698	0.360919	0.202521	0.304293	0.502946	1	0.204477	0.462953	0.130212	0.866098	0	0	0.325549	0.0763005	0.511016		0.0851183	0.0650008	0.225975	0.0310521	0	0	0.0633367	0.0921762	0.599364	0.141414	1	0.469102	0.351826	0.0117332	0	0.0414499	0.106139	0.50112
0.544058	0.0458911	0	0	0.271228	0.452047	0.706749	0.859354	1	0.594701	0.159006	0.151928	0.447202	0.43193	0.723739	0.244769	0.066223	0.109487		0.8027	0.272484	0.206186	0.0937822	0	0	0	0.169504	0.0943422	0.679152	1	0.780336	0.441565	0.00419091	0	0	0	0.12461
0.0309101	0.147983	0.202494	0.25588	0.0792928	0.254252	0.416418	0.13939	1	0.345773	0.0441055	0.265625	0.238572	0.0182309	0.0593673	0.474772	0.183234	0.364498		0.3734	0.0861392	0.234571	0.00519804	0.0247829	0.0191415	0.00294453	0.135985	0.0954493	0.316543	1	0.176112	0	0.0751362	0	0.0527882	0.00793084	0.104735
0.390592	0.751528	0.874905	0.698931	0.502133	0.402542	0.484749	0.253993	1	0.69833	0.619077	0.382341	0.283423	0	0	0.128674	0.0627295	0.108096		0.692679	0.231192	0.646354	0.568652	0.356928	0.403997	0.558141	0.136242	0.40813	0.964435	1	0.687807	0.497736	0.491863	0.111388	0.331157	0.221182	0.903567
0.0540519	0.359676	0.482653	0.6937	0.673297	0.611367	0.519577	0.406661	1	0.573859	0	0.397989	0.363051	0	0.113551	0.155806	0.0584274	0.471566		0.956922	0.190508	0.152483	0.731983	0.1929	0.0773435	0.285905	0.0500626	0.0983548	0.255019	1	0.590696	0.292237	0.335437	0.0142711	0.468573	0.285919	0.100152
0.346336	0	0	0	0	0	0.676849	0.262015	1	0.224491	0.2319	0.0790723	0	0	0	0.178711	0	0.350121		0.418605	0.568897	0.539766	0.546057	0.194526	0.217646	0.284282	0.602154	0.770441	0.74455	1	0.555823	0.349425	0.5003	0.458523	0.0660009	0.177554	0.0555198
0.371868	0	0	0	0	0	0	0.306564	1	0.375812	0.0303066	0.233738	0	0	0	0	0	0.598597		0.666741	0	0.298139	0.176602	0	0	0	0	0.340268	0.423134	1	0	0	0	0	0	0.0377057	0.591995
0.0305835	0	0	0	0	0	0.340193	0	1	0.256093	0.0285309	0.0242959	0.148033	0	0.127268	0.0241148	0	0.00166008		0.86951	0.644829	0	0.0435817	0.125352	0	0	0	0.699447	0.214893	1	0.351852	0.0958761	0.971398	0	0	0	0.663874
0.278244	0.115926	0	0	0.30089	0.30089	0.396576	0.134609	1	0.508938	0.661716	0.138796	0.194143	0.829468	0.876707	0.585143	0.0533976	0.0727481		0.0761191	0.419607	0.377438	0.406867	0.242254	0.10602	0.195667	0	0.00711061	0.125032	1	0.48159	0	0.124708	0	0	0.0335539	0.192606
0.308163	0.507504	0.695412	0.635632	0.664746	0.754484	0.658573	0.160731	1	0.380045	0.174151	0.899874	0.737523	0.38411	0.476711	0.812338	0.278528	0.288889		0.193382	0.195233	0.0578787	0	0.414557	0	0.0628238	0	0.0318801	0.546492	1	0.957425	0.0282518	0.310769	0.287919	0	0.0590327	0.263372
0.166266	0.247568	0	0	0	0	0	0.683948	0.477845	1	0.217361	0	0.120707	0.234986	0.129219	0.0274522	0	0.00815878		0.322036	0.42868	0.164347	0.266804	0.625847	0.659918	0.719468	0.5381	0.306552	0.393734	1	0.905183	0.50825	0.393375	0	0.111711	0.17527	0.0829907
0.359544	0.13918	0.00847775	0.378191	0.594182	0	0.0496236	0.0536514	0.0536509	1	0.245636	0.12022	0.540988	0.403852	0.665236	0.27359	0.0267679	0.133763		0.0155354	0.132881	0.0841922	0.0512221	0.298043	0.27794	0.531025	0.739006	0.649795	0.973504	1	0.5115	0.374659	0.401797	0.615467	0.49565	0	0.29276
0.167631	0	0	0	0	0	0.109395	0.0363112	0.0665628	1	0	0	0	0.0334557	0	0	0.233471	0.0449463		0.287153	0.283485	0	0.0553928	0.566363	0.387713	0	0	0.0705453	0	1	0.552991	0.552991	0.207372	0	0	0.075774	0.0742743
0.0679369	0.0526575	0	0	0	0	0.0250634	0.100267	0.0884379	1	0	0.123666	0.128834	0.17865	0.0119294	0.799387	0.660257	0.0492412		0.320956	0.660313	0.56906	0.492361	0.479054	0.479054	0	0	0.0223675	0.145592	1	0.95646	0.128117	0.247516	0.505657	0.60107	0.278425	0
0.251144	0	0.374209	0	0	0	0.0549669	0.0120529	0.43604	1	0.493175	0	0	0.122109	0.0224569	0.316467	0.1363	0.669586		0.146461	0.0338489	0	0	0	0.265944	0.752862	0.107515	0	0.111111	1	1	0	0	0.13929	0.0441652	0	0
0.151738	0.00360817	0	0	0	0	0.298455	0.879954	0.330733	1	0.127707	0.0635981	0.436354	0.101204	0.0923219	0.116082	0.337998	0.35078		0.3109	0	0.102564	0.0333297	0.790016	0.579337	0	0	0.388252	0.435397	1	0	0	0.413792	0.706912	0.992592	0.112955	0.45355
0.120432	0.0653764	0.158859	0.274268	0.19691	0.105646	0.37936	0.00372394	0.413941	1	0.0550645	0.185724	0	0.294581	0.394598	0.23758	0.0290445	0.137485		0.299761	0.550731	0.308252	0.0243357	0	0	0.0421611	0.00728518	0.0309998	0.565487	1	0.697677	0.0679552	0.124902	0	0.301047	0.84067	0.180616
0.132028	0.0972105	0.112904	0	0	0	0.148595	0.444447	0.358473	1	0.193325	0	0	0.562476	0.817592	0.0594915	0.0724878	0		0.166741	0.728127	0.80903	0.80903	0.408627	0	0.116052	0.0332752	0.0155195	0.688522	1	0.38356	0.613057	0.971856	0.166031	0	0	0.0866618
0.00138689	0.00766633	0.22765	0	0	0	0	0	0.690886	1	0.162076	0	0	0	0	0	0	0.452704		0.349474	0.590657	0.246107	0	0	0	0.0938136	0.243998	0	0.557773	1	0.912036	0.364815	0.0851405	0.409169	0.0858891	0	0.0151391
0.00746292	0.0134421	0.098389	0	0	0.101149	0.857815	0.759014	0.392247	1	0	0	0.400924	0.168406	0.192978	0.00809913	0.0897569	0		0.87034	0.499839	0.631069	0.294499	0.013423	0.30869	0.773771	0.22758	0.128558	0.382474	1	0.710043	0.129184	0.204158	0.462498	0.492625	0.225809	0.156476
0.830535	0	0.34497	0	0	0	0.0801835	0.371779	0.55452	1	0.383339	0	0	0.141978	0	0	0	0.779392		0.264102	0.628139	0.187905	0.0507117	0.233279	0.713884	0.69223	0	0.0478819	0.136772	1	0.735724	0.420414	0	0.106899	0.12807	0.443417	0.288288
0.0254133	0	0.215234	0.358718	0.289733	0.356525	0.0879632	0	0.681681	1	0	0	0	0.0229892	0.0107333	0	0	0.534597		0.234589	0.627498	0.89903	0.771337	0.813098	0.94149	0.798208	0.0793067	0.2079	0.89025	1	0.894721	0.788113	0.544284	0.272695	0	0.0604755	0.120455
0.204945	0.0436781	0.216094	0.611055	0.383868	0	0.0976758	0	0.0826177	1	0.887921	0.222086	0	0	0.0449278	0.0223072	0.0132245	0		0	0	0.310765	0.0684664	0	0.0998212	0.137774	0.137458	0.546815	0.39886	1	0.965738	0.501599	0.450814	0	0.115217	0.0646411	0
0.056534	0.124155	0	0	0.0332019	0.305531	0.0431754	0.250727	0.802694	1	0.279125	0.406272	0.161004	0.0817857	0.53963	0.729359	0.0640381	0.0192855		0.172205	0	0	0.00796176	0.0344912	0	0.0143604	0.152838	0.223531	0.85	1	0.6	0	0.981857	0.429562	0.0313282	0.123739	0.0639431
0.223033	0.0223194	0	0	0	0	0.091707	0.0435139	0.168697	1	0	0	0	0	0.00745373	0	0	0		0	0.093554	0.0362073	0.114981	0	0.0196991	0.0215283	0.181768	0.488831	0.828857	1	0.478338	0	0	0	0	0	0
0.541115	0.0919145	0.202111	0	0	0	0.242911	0	0.146951	1	0.417197	0.204508	0.280995	0.983484	0.0297161	0.0446437	0	0.326561		0.3174	0.387063	0.130965	0.0337547	0.477257	0.404845	0	0.719982	0.366215	0.65067	1	0.897319	0.332854	0.430508	0.54932	0.129388	0	0
0.0133091	0.0348934	0	0.439105	0.472882	0	0	0.378665	0.669535	1	0.0793503	0.279675	0.040899	0.186994	0.270312	0.0193405	0.0122954	0.0177513		0.294548	0.167131	0.105265	0.0609666	0.0533586	0.231099	0.2867	0.0531491	0.150814	0.228017	0.0784119	1	0.109874	0	0	0.0912824	0.12288	0.109365
0.402565	0.0118117	0.79142	0	0	0	0	0	0.0485954	1	0.87426	0	0	0	0	0	0.0426943	0.984124		0.283925	0.250424	0	0	0	0	0.741468	0	0.79716	0.273015	0.103977	1	0.012	0	0	0	0	0
0.0857432	0	0.0962097	0.330165	0.224874	0.132277	0.0449232	0.046527	0.154881	1	0.830193	0.119286	0.0144406	0.0954701	0	0.0203122	0	0.00567885		0.464753	0.854462	0.275022	0.0673151	0.176869	0.45011	0.13545	0	0.210511	0.0775211	0.2145	1	0.694404	0.381355	0.928949	0.587101	0.538293	0.418382
0.0468483	0.0193428	0.0157057	0.155748	0	0	0	0	0.00315135	1	0	0	0	0	0.00787821	0	0	0		0.0601848	0.678805	0.315112	0.0573297	0.0163581	0.0584218	0	0.134476	0.255957	0.40641	0.223143	1	0.227177	0.423697	0.560262	0.56105	0.863837	0.155475
0	0	0	0	0	0	0.0854701	0.434404	0.842287	1	0.0828869	0.0291113	0.209667	0	0	0.288726	0	0		0.0606325	0	0	0	0	0	0	0.242592	0.0482189	0.781904	0.2	1	0.15	0	0	0.103305	0	0
0	0.0396648	0.15648	0.0808884	0	0.490692	0.461828	0.155902	0.574583	1	0.174871	0.0327217	0.0627187	0.0720855	0.411917	0.0322268	0.416191	0.357746		0.873325	0.956696	0.142997	0.685461	0.0224754	0.126725	0.166612	0.512167	0.551523	0.336479	0.2146	1	0.733498	0.69847	0.791017	0.511166	0.232998	0.427905
0.798278	0.215279	0.582829	0.622088	0.444465	0	0	0.335521	0.457429	1	0.143891	0.326227	0.133517	0.0408378	0.616802	0.0499854	0.314073	0.452619		0.693021	0.0233804	0.180007	0.86695	0.308139	0.250185	0.174064	0.425102	0.587415	0.630125	0.0157145	1	0.198123	0.362332	0.166389	0	0.102651	0.193194
0	0	0.233671	0.172041	0	0	0	0.31447	0.27561	1	0	0	0.0596938	0	0	0.0183564	0	0.0769351		0.135506	0	0.291964	0.722997	0.369532	0.146225	0	0.172255	0.149394	0.514878	0.137194	1	0	0.269087	0	0	0.488851	0.757113
0.0709933	0.53445	0.0656938	0	0	0	0.312996	0.215194	0.776235	1	0.014915	0.0747859	0.7208	0	0.0234659	0.505292	0.15775	0.278004		0.169974	0.33658	0.263408	0.471572	0.34336	0.479501	0.7155	0.994299	0.955852	0.479931	0.54875	1	0.862295	0.398857	0.253197	0.136706	0.0743517	0.25104
0.330393	0.179273	0	0.0391066	0	0	0.111775	0.60257	0.145631	1	0.646068	0.00235324	0.0261994	0.0629041	0.0155754	0.224975	0.0103337	0.0178057		0.378861	0	0	0.907386	0	0	0.770546	0	0.852515	0.607779	0	1	0.625	0.0887695	0.394763	0.445972	0.202627	0.274223
0.220596	0.0321713	0.668073	0.213262	0.652835	0	0	0.324152	0.477275	1	0.405401	0.0029158	0.0696049	0.853282	0.22994	0.0462846	0	0		0.450981	0	0	0.0955623	0	0.0999859	0	0	0.337131	0.173795	0.981804	1	0	0	0	0	0	0.154586
0	0.844064	0	0	0	0.684174	0	0	0	1	0	0	0.107106	0	0.562497	0.713608	0	0		0.111703	0.00809578	0	0	0	0	0	0	0	0	0.634219	1	0	0.0435277	0	0.00803671	0.209032	0.278597
0.136432	0	0	0	0	0	0.0193522	0.118389	0.426133	1	0.163625	0	0	0	0	0.00641685	0	0.0208535		0.0337959	0	0.0913486	0.00915711	0	0	0.134279	0.107903	0.141264	0.0453444	0.157761	1	0.113795	0	0	0	0	0.528994
0.0605623	0.282172	0.405505	0.0267399	0	0	0.0372563	0.399615	0.387816	1	0.107902	0.213964	0	0.0902182	0.0458959	0.0456819	0	0.424527		0.726093	0.943177	0.300473	0	0	0	0	0	0.309	0.299417	0.47206	1	0.155844	0.111624	0	0	0.331839	0.287245
0	0	0	0	0	0	0	0	0.548077	1	0	0	0	0	0	0.219267	0	0		0	0	0	0.261641	0	0	0	0	0.0929807	0	0	1	0.311688	0	0.0368516	0	0	0
0.312787	0.0922754	0	0	0	0	0.0742012	0.364601	0.462008	1	0	0	0	0	0.0765831	0.104289	0	0		0.19646	0.304609	0.258814	0.531076	0.885887	0.763317	0	0	0	0.365653	0.954349	1	0.53861	0.854926	0.703333	0.584592	0.370566	0.207348
0	0	0	0	0	0.32078	0.528344	0.868829	0.833637	1	0.172976	0.00919845	0	0	0	0.139732	0	0		0.389363	0.529418	0.0851533	0.0288211	0.472136	0.607931	0.55164	0	0.376736	0.670535	0.939766	1	0.535226	0.535226	0.120333	0	0.0454425	0.00280509
0	0	0.460647	0.0688938	0	0	0.127703	0.258773	0.153126	1	0.382232	0.0975097	0.187107	0	0	0.0113215	0	0		0	0	0	0	0	0	0.0310033	0.0202033	0	0.0233107	0.931079	1	0.520321	0.110966	0	0	0.314664	0.198215
0.236038	0.38033	0.853439	0.203418	0	0.243874	0.342085	0	0.0299208	1	0.0547676	0.443072	0.167403	0	0.469804	0.0444139	0	0		0.249566	0.0582093	0.169042	0.0114429	0.145042	0.0540526	0.0859782	0.0369108	0.373304	0.109123	0.827744	1	0.708966	0.383502	0.215073	0.537126	0.629276	0.730708
0.0666754	0	0	0	0.074818	0.0936285	0.297695	0.198686	0.35419	1	0.0692475	0.0318071	0.02027	0.0170903	0	0.00353093	0	0.0177432		0.197399	0.218479	0	0	0.117439	0	0	0	0	0	0.28177	1	0.138956	0.292364	0.134006	0.259981	0.611718	0.108228
0	0	0	0	0	0	0	0.051849	0.396924	1	0.0180312	0	0	0	0	0.0342379	0	0		0.0315592	0.0186226	0.259081	0.350123	0.445994	0.325293	0.45976	0.133162	0.0104732	0.385552	0.63516	1	0.974269	0.794515	0.463551	0.207731	0.352597	0.185255
0.183574	0	0	0	0	0	0.306167	0.581481	0.561449	1	0.0627614	0.0146238	0	0	0.0161653	0.694858	0	0		0.164535	0.338668	0.133637	0.0800218	0.238576	0.173051	0	0.0353123	0.269367	0.103236	0.392296	1	0.482335	0.237356	0	0	0.0872561	0.00381531
0.799673	0	0	0.865504	0	0	0	0.0774465	0.697039	1	0.168131	0.0994017	0.0972567	0	0	0.0240151	0	0.312448		0.32038	0.657358	0.151578	0.0347622	0.104872	0.255369	0.0419688	0.520825	0.145575	0.129359	0.273693	1	0.630647	0.118076	0.348455	0.167653	0.00944194	0
0.844203	0	0.145244	0	0	0	0.178183	0.0589356	0	1	0.580788	0	0	0	0.0407341	0.0518445	0	0		0.147705	0.50894	0.199586	0.0849374	0.180297	0.213267	0.211285	0.267129	0.255893	0.260244	0.450267	1	0.770093	0.48451	0.646471	0.0956879	0.0133054	0
0.00474676	0	0	0.0603254	0	0.0597476	0.282166	0.0128018	0.538147	1	0.554991	0.168177	0	0.19913	0.00677325	0.00571053	0	0		0	0	0	0	0	0	0.818105	0.753518	0.0685016	0	0.972222	1	0	0	0	0	0.454293	0.354905
0	0	0	0	0	0	0	0.0367318	0.52058	1	0	0	0	0	0	0	0.238797	0.136619		0.050461	0.16699	0.137144	0.0044349	0.466629	0.0664467	0.0256736	0.0953861	0.902022	0.385344	0.951314	1	0.787068	0.670022	0.556197	0.0262805	0	0
0.306413	0.276959	0.166671	0.0161707	0.0442453	0.0139504	0.0674964	0.0875671	0.848446	1	0.0559757	0.247404	0.177679	0.0996402	0.0773128	0	0.0471888	0.13792		0	0.197733	0.136197	0.0959464	0	0	0	0	0.385895	0	0	1	0.171577	0	0	0	0	0
0	0	0	0.0841106	0.351063	0.378121	0.175572	0.674951	0.33006	1	0.0284135	0.0336855	0	0.0267893	0.0481796	0.0891959	0.0113216	0.111993		0	0	0	0	0	0.28632	0.11399	0.419962	0.457169	0.105927	0.629981	1	0.924994	0.507323	0.217424	0	0	0
0.167602	0.272232	0.0375411	0	0	0.00479873	0	0	0.622624	1	0.0306148	0	0.0117317	0.267315	0.0893486	0.22141	0.172207	0.0318348		0.165077	0.0467102	0.237831	0.317371	0.184839	0	0	0	0.167819	0.182244	0.497898	1	0.210288	0.0207075	0.0704056	0	0	0
0.465487	0.420574	0.082974	0.137161	0.437745	0.246396	0.4979	0.522117	0.966025	1	0.237424	0.0497252	0.336399	0.164549	0.0195088	0.265853	0.256877	0.0824202		0.374071	0.322791	0.000825178	0.174876	0	0.0730806	0.623443	0.601971	0.160162	0.224188	0.219616	0.35594	1	0	0.0712599	0	0.364208	0.139767
0.0913738	0.0725409	0.0793091	0	0.0906525	0.0573516	0.168628	0	0.0534641	1	0	0	0	0.600191	0.210067	0.226321	0	0.0396639		0	0.0830804	0.0566298	0.151549	0.0376529	0.19902	0.406191	0.451904	0.697414	0.138039	0.532395	0.803103	1	0.646881	0.407474	0.467046	0.174231	0.0275777
0.256103	0.438769	0.218115	0.282895	0.649185	0.00151079	0	0.441529	0.190948	1	0	0.501223	0.78872	0.889508	0.243551	0	0.680222	0.390283		0.28391	0.277406	0.367227	0.290981	0.379798	0.352008	0.498753	0.454542	0.539316	0.426223	0.799869	0.436107	1	0.719255	0.451187	0.18804	0.172771	0.00344063
0.976384	0.662137	0.0134387	0	0	0.0442506	0	0.0164695	0.287911	1	0	0.772823	0.206086	0	0.0761275	0.028732	0	0		0.210691	0.397611	0.981349	0.966769	0.364199	0.344023	0	0	0.336012	0.122038	0.270094	0.556632	1	0.610672	0.270426	0.459524	0.167516	0.181027
0.046471	0.349915	0.95892	0.41181	0.314825	0.096635	0	0	0.11263	1	0.0336333	0.22198	0	0.667391	0.666769	0	0	0.198273		0.632548	0.354297	0.533635	0.158055	0.028519	0.0389233	0	0.16901	0.0773213	0.00728281	0.0613569	0.63187	1	0.762792	0.939674	0.909928	0.289099	0.649627
0.00728666	0.00466489	0.0422205	0	0	0.319796	0.958428	0.527136	0.262624	1	0.762209	0	0	0	0.322491	0.0265132	0.183719	0		0.477103	0.134008	0.758093	0.333866	0.0241302	0.273039	0.707795	0.483967	0.389708	0.094624	0.407844	0.784881	1	0.974942	0.616713	0.284054	0.110784	0.265789
0.00904147	0.108837	0	0.0858005	0	0	0.128115	0	0.0157028	1	0.773441	0	0.267261	0.250915	0.146013	0.0275541	0.0334972	0.086287		0.487049	0.191417	0.175295	0.399036	0.235948	0	0	0.0523009	0.912619	0.813146	0.122485	0.564222	1	0.836907	0.828173	0.206303	0.0475387	0.134317
0.84779	0.0396112	0.2549	0.970314	0.666231	0	0	0.724118	0.255562	1	0.211915	0	0	0	0	0.163579	0	0		0.703858	0	0.0313989	0.529358	0.529358	0.553829	0.456029	0	0.0453868	0.30506	0	0.222322	1	0.465826	0.932945	0.799751	0.142564	0
0.0746299	0.0653847	0.0240394	0.214464	0.129661	0.00242985	0.273364	0.211379	0.709587	1	0.180266	0.335376	0.0179856	0	0	0.139289	0.160299	0.0831584		0.512338	0	0.632604	0.341207	0.145964	0.102581	0	0.140353	0.596466	0.167464	0	0.23315	1	0	0	0.078132	0.0537026	0.0752789
0.12842	0	0.0108283	0	0	0	0	0.569995	0.153471	1	0.335011	0	0	0	0	0	0	0		0.0444824	0.0475153	0.456326	0.342274	0	0	0	0	0.148254	0.122571	0.699734	0.891854	1	0.318654	0	0.260301	0.13611	0.0648967
0.295804	0.175214	0.204969	0.534209	0.481651	0.616513	0.305821	0.354196	0.437786	1	0	0	0	0	0	0	0.0973858	0.868992		0.100332	0.0853403	0.250857	0	0.385844	0.500112	0.38238	0.0812266	0.146208	0.453412	0.512039	0.918719	1	0.837533	0.0164903	0.193537	0.214692	0.36909
0	0.149975	0	0	0	0	0	0	0	1	0	0	0	0	0	0	0	0		0.155985	0.0482137	0	0	0	0	0	0	0.206971	0.0804886	0	0	1	0	0	0	0.11296	0.100199
0.171528	0.226516	0.568295	0.323563	0.0834463	0	0.214781	0.677855	0.127509	1	0	0	0	0	0.361625	0	0	0		0.0296123	0.364038	0.168941	0	0.0207604	0.0463266	0.440992	0.661705	0.701464	0.833378	0.657571	0.564552	1	0.953941	0.397351	0.449313	0.153777	0.125658
0	0	0	0	0	0	0	0	0.0249516	1	0.531085	0	0.311657	0.338643	0	0.0675713	0.360376	0		0.225928	0.599873	0	0	0.0889773	0.456009	0	0	0	0	0	0	1	0	0	0	0.0506847	0.559812
0.690437	0.0967643	0.143331	0.0841864	0.28783	0.238614	0	0.414801	0.629622	1	0.588584	0.858523	0.364305	0.306792	0.273469	0.380118	0.445373	0.411846		0	0	0.635302	0	0	0	0.448004	0	0	0	0	0	1	0	0	0	0	0
0	0	0	0.418373	0.661125	0	0	0	0	1	0	0	0	0	0	0	0	0		0.00612729	0.00969992	0	0.353501	0.334786	0.468437	0	0	0.402192	0.298261	0.762907	0.762907	1	0.392831	0.370098	0	0.156657	0.0127207
0.422367	0.254726	0.0568502	0.178783	0	0.207772	0.281141	0.493914	0.236306	1	0.229132	0.747547	0.934296	0.581469	0.584647	0.572368	0.656348	0.647203		0.194618	0.128826	0.46266	0.120709	0	0	0.492782	0.817576	0.847457	0.400218	0.139094	0.48129	1	0.813826	0.896065	0.700711	0.0139018	0.842184
0.408454	0.0503872	0.315502	0.0548737	0.299228	0.342866	0.383064	0.49605	0.580213	1	0.932606	0.392504	0	0	0.100876	0.0862885	0.687332	0.657607		0.114276	0	0.100575	0.078217	0.27376	0	0	0.00424964	0.140524	0.577404	0.0580414	0.833423	1	1	0.373034	0	0.348003	0.773854
0.0471175	0.00636541	0.0028417	0	0	0	0	0	0.444053	1	0.0364751	0	0.0327786	0	0	0	0.211592	0.537212		0.199297	0.25248	0.174614	0.089335	0.269051	0	0.250795	0.270273	0.550279	0.299281	0.249643	0.714798	1	0.504957	0.685218	0.877938	0.545446	0.305725
0.132937	0.297052	0.58018	0.119655	0.198029	0.160679	0	0.273641	0.91422	1	0.40306	0.166009	0.0484047	0	0.112314	0.399145	0	0.460117		0	0	0.0895234	0	0	0	0	0	0.0587228	0.490682	0.708764	0.567011	1	0.285448	0	0	0	0
0.0489583	0.0471445	0.0197578	0.178405	0.0977561	0.197453	0	0.0736215	0.355084	1	0.210442	0.00246484	0	0	0	0	0.0888943	0.0174218		0.0438499	0.106546	0.157778	0.176035	0.441916	0.732871	0.528428	0.477435	0.310446	0.0467982	0.359903	0.805607	1	0.798849	0.666991	0.42158	0.191604	0.206712
0.00659304	0	0	0	0	0.567812	0.100944	0	0.315985	1	0.00692703	0	0	0	0.040213	0	0	0.378424		0.379887	0.0475339	0.0160067	0	0	0	0	0	0.208477	0.714035	0	0	0.119658	1	0	0	0	0
0.293617	0.141943	0	0	0.0112949	0.238925	0.720514	0.721739	0.842122	1	0.0179096	0.126624	0	0	0	0	0.075033	0.296513		0	0.117188	0.449365	0.749855	0.377697	0	0.369165	0.0378818	0.333408	0.328845	0.032407	0.074101	0.815111	1	0.320895	0.384619	0	0.0981209
0.00443459	0	0.0841993	0	0	0	0.0610105	0.305723	0.949769	1	0.0718914	0.0328485	0.150556	0	0	0	0.332957	0.023122		0.0788217	0.116908	0.421949	0.413099	0.0915087	0.131721	0.269783	0.262233	0.54205	0.662689	0.989631	0.450757	0.794369	1	0.557954	0.295301	0.205781	0.0903775
0.0379904	0	0.0952075	0.00456539	0	0	0	0	0.0340447	1	0.352628	0	0	0.0288895	0	0	0.0107605	0.047876		0.0854079	0.21427	0.320545	0.454844	0.298843	0.258253	0.0549839	0.440938	0.0884893	0.551255	0.440593	0.0901929	0.601446	1	0.862557	0.508779	0.0670412	0.196637
0.183307	0.2806	0.402384	0.461457	0.379384	0.536201	0.998019	0.704208	0.491627	1	0.762683	0.231583	0	0	0.0872854	0.0288042	0.218866	0.0868186		0.325177	0.517592	0.727874	0.471	0.407224	0.735828	0.493923	0.280804	0.130571	0.280894	0.215686	0.332545	0.616126	1	0.371656	0.533769	0.713313	0.16
0.318413	0.195023	0.0649086	0	0	0	0	0.123262	0.10099	1	0.63095	0.0934594	0	0	0	0	0	0.0347262		0.519429	0.588512	0.42561	0.46836	0.223348	0.0756565	0.109661	0.152575	0.938377	0.718633	0.0491049	0.267046	0.184525	1	0.592943	0.465478	0.239288	0.153408
0.536634	0.396028	0.420377	0.132412	0	0	0	0	0.0195854	1	0.533615	0	0	0	0	0	0	0.233342		0.576471	0.564921	0.185609	0.18283	0	0.0985633	0.0353748	0.0887193	0.307043	0.109844	0.0767569	0.578821	0.605343	1	0.931401	0.199115	0.0948273	0.186603
0.15796	0.433718	0.491912	0.307996	0.293328	0.0537768	0.0943055	0.197483	0.977314	1	0.280274	0.140597	0	0	0.031832	0.162455	0.215355	0.102727		0.0935457	0.162457	0.280167	0.0594488	0.0536023	0.0488972	0.212247	0.358172	0.4351	0.102197	0.514489	0.752948	0.966251	1	0.544055	0.833602	0.291049	0.133355
0.690939	0.133448	0.0397825	0.0934749	0	0	0	0.202665	0.52363	1	0.401144	0.142938	0	0.024146	0	0	0.115413	0		0.402259	0.27182	0.183338	0.152002	0.182866	0.146633	0.0907146	0.0844232	0.114882	0.144001	0.392809	0.271357	0.261492	1	0.657246	0.75924	0.284209	0.044225
0.345357	0.00651484	0.472029	0	0	0	0	0	0.608567	1	0.0707336	0	0.675268	0.169567	0.415756	0.753313	0.129205	0.592833		0.612989	0.0455256	0.439397	0	0.0794422	0.228541	0.198354	0.00197384	0.0742299	0.637611	0.138253	0.794476	0.80654	1	0.0559966	0.0482248	0.154834	0.242338
0.237231	0	0	0	0.688345	0.209444	0	0	0.665637	1	0.104652	0.452176	0.0342592	0	0.307217	0.437533	0	0.619818		0.804059	0.889398	0.727972	0.132872	0.00241852	0.0819054	0.0771277	0.460607	0.571067	0.265773	0.107751	0.479502	0.386131	1	0.489814	0.4531	0.491356	0.533348
0.253207	0.912018	0.160754	0.0337389	0	0	0.0878755	0.507967	0.490516	1	0.145365	0.307351	0	0	0.0477831	0.194477	0	0.0254408		0.129844	0.0096668	0	0.0131034	0.0849896	0.0553927	0.021852	0.189432	0.0834881	0.280379	0.42957	0.292912	0.419003	1	0.162414	0.184686	0.0870627	0.248341
0.339371	0.0124172	0.101629	0	0	0	0	0	0.013457	1	0.0253653	0.0568362	0	0	0.416939	0.515962	0	0.805543		0.201874	0	0.17807	0.835667	0.532706	0.183261	0	0.186668	0.28214	0.0843235	0.0469957	0.146218	0.325374	1	0.256658	0.213029	0.231371	0.00796234
0	0	0	0	0	0	0	0.402067	0.0525428	1	0.106972	0	0	0	0	0	0	0.0625527		0.04208	0.218574	0.736625	0.847561	0.536822	0.352171	0.314115	0.203346	0.139867	0.113264	0.564754	0.862642	0.86886	1	0.550261	0.176121	0.177685	0.14858
0.584474	0.618882	0	0	0	0.225207	0	0.129807	0.505904	1	0.0630692	0.206624	0.121193	0.259968	0.292141	0.408581	0.060012	0.183419		0.818759	0.229713	0.441745	0.489217	0.385619	0.566385	0.632451	0.329271	0.346057	0.615484	0.865147	0.496868	0.71202	1	0.351832	0.507722	0.34329	0.969916
0.329065	0.327018	0.123203	0.445778	0.32153	0.356744	0.73214	0.994208	0.612808	1	0.673198	0.120447	0	0.0482228	0.365116	0.0742619	0.175558	0.517887		0.0270635	0.107658	0.000993747	0	0.0778136	0.228841	0.096192	0.222841	0.13737	0.108986	0.0296912	0.002286	0.633501	1	0.696513	0.532834	0.0547587	0.101361
0.777083	0.925674	0.249331	0.766442	0.132474	0.146728	0.299481	0.0116088	0.612954	1	0.309205	0.687022	0.0294239	0.0640137	0.625133	0.94082	0.528865	0.583581		0.226436	0.222368	0.275715	0.571874	0.454769	0.715653	0.212528	0.16441	0.126174	0.551814	0.672678	0.705346	0.703826	1	0.716556	0.707357	0.137335	0.207199
0.224266	0.101309	0.325607	0.506743	0.452198	0.370744	0.40004	0.447113	0.435475	1	0.697452	0.577827	0.588245	0.742702	0.200755	0.134323	0.196425	0.258661		0.354802	0	0.356092	0.119047	0.273791	0.121031	0.808798	0.256288	0.341133	0.422437	0.518429	0.0492515	0.866253	1	0.712149	0.00978536	0.00269498	0.0738549
0.249323	0	0	0	0.0867715	0	0	0.364124	0.31668	1	0.396176	0.0997613	0	0	0	0.18795	0.26379	0.182898		0.210638	0	0	0	0	0	0	0.39084	0	0.0832278	0.313694	0	0	1	0.817213	0.272339	0.0416458	0
0.264925	0.0784759	0.0802239	0	0.0627487	0.0757342	0	0.163237	0.634914	1	0.00626584	0.0286338	0.107377	0	0.0907909	0.403321	0	0.0928649		0.15159	0.0217642	0	0	0	0	0	0.149117	0.120076	0.656291	0.298334	0.346399	0	1	0.339026	0.274857	0.104468	0.623923
0.151583	0	0.167695	0.0633253	0	0	0	0.12369	0.495292	1	0.260714	0.227252	0.0935395	0.0626084	0	0	0.0639073	0.0417479		0.817758	0.0800915	0.222156	0.0296208	0.0764225	0.237467	0.24867	0.023882	0	0	0	0.424099	0.7083	1	0.549692	0.149714	0.0244986	0.0238897
0.208002	0.560621	0.468848	0.00972907	0.269974	0.628889	0.593468	0.246452	0.750644	1	0.308715	0	0	0	0.103278	0.2534	0.0942976	0.617871		0.397359	0.113481	0	0	0.233389	0.242197	0.783421	0.775748	0.199478	0.145573	0.436718	0.566836	0.891227	1	0.799963	0.406682	0.526623	0.455098
0.120846	0	0	0	0.0352841	0.182511	0	0.00983773	0.029062	1	0.471987	0.0380227	0	0	0	0	0	0.210675		0.722454	0.782405	0.547248	0.124937	0.134555	0.134555	0.134555	0.191188	0.268541	0.6704	0.166893	0.298991	0.695232	1	0.630081	0.483461	0.27769	0.173083
0	0	0.0288805	0.461366	0.150038	0	0	0	0.448638	1	0	0	0	0	0	0	0.111627	0.13927		0.180117	0.00594958	0	0.298121	0.891806	0.132791	0.0673888	0.020339	0	0	0	0.203982	0.617912	1	0.852061	0.73601	0.0403977	0.120642
0.0132293	0	0	0	0	0.233257	0.0675398	0.0753138	0.873916	1	0	0	0	0	0	0	0.165129	0.0962631		0.00837573	0.571584	0.512941	0.320114	0.235957	0.0710887	0.0653321	0	0	0	0.204107	0.295519	0.821857	1	0.969899	0.405065	0.122446	0.00442985
0.620054	0	0	0	0	0	0.595624	0.747824	0.500526	1	0	0	0	0	0.456156	0	0.289603	0.976218		0.971272	0	0.210014	0.26771	0	0.0487414	0.146977	0.138566	0.402425	0.0224204	0.426425	0.241729	0.220917	1	0.180556	0.480398	0	0.149653
0.969414	0	0	0	0	0	0	0	0.127443	1	0	0	0	0	0.337012	0	0.916294	0		0.16325	0	0	0	0	0	0	0	0	0	0.0522996	0.366097	0.457269	1	0.69427	0.287902	0	0.252122
0.127609	0	0	0	0	0	0	0	0	1	0	0	0	0	0	0	0	0		0.224019	0.587371	0.497673	0.499384	0.0855672	0.291674	0.629658	0.126202	0.0922237	0	0.074559	0.403285	0.345953	1	0.0988436	0.385986	0.617651	0.135017
0.0892944	0	0	0	0	0	0.0363227	0.311329	0.707195	1	0	0	0	0	0	0.390137	0.13497	0		0	0.0808186	0.323998	0.176709	0.00582882	0.0755675	0.184314	0.442235	0.464608	0.082104	0.335352	0.573554	0.7102	1	0.431581	0.468937	0.0739513	0
0	0	0	0	0	0	0	0	0	1	0	0	0	0	0	0	0	0		0.0955516	0.106368	0	0	0	0	0	0	0.685044	0.559649	0	0	0	0	1	0.2	0	0
0.806215	0.131522	0.0475457	0	0	0.102144	0.061268	0.2221	0.058953	1	0	0	0	0	0	0.318629	0	0.830933		0.247095	0.360852	0.419533	0.0320203	0.436727	0.686585	0.686585	0.881013	0.957504	0.475046	0	0	0	0.375	1	0.818182	0	0.656002
0	0.157485	0.00579531	0	0	0	0.0616555	0.00806119	0.594817	1	0	0	0	0	0	0	0.38096	0.159449		0.559448	0.222272	0.0246038	0.117641	0.662746	0.581396	0.581396	0.597744	0.321248	0.921564	0.16506	0.38199	0.126349	0.676131	1	0.116031	0.830799	0.849369
0.180364	0	0	0	0	0.0824617	0.0865587	0.481045	0.807763	1	0	0	0	0	0	0.0912234	0	0.155108		0.419212	0.242222	0.0262979	0.266602	0.933108	0.72575	0	0	0.175684	0.2177	0.175261	0.0233548	0	0.375	1	0.181818	0	0.0120501
0	0	0	0	0	0	0.720497	0	0.377811	1	0	0	0	0	0	0	0	0		0.876029	0.597442	0.285388	0.222201	0.9004	0.129098	0.893697	0.351774	0.134544	0.460429	0.48461	0.342507	0	0.657292	1	0.637752	0.812646	0.575397
0.0204832	0	0	0.0557919	0.1697	0	0.160749	0.434977	0.631501	1	0.0479047	0	0.0678526	0.10087	0.143453	0.0985255	0.0785392	0.0822676		0.299291	0	0.257398	0.174158	0.0801413	0.269245	0.561517	0	0.165146	0.516878	0.100185	0.17341	0	0.197386	1	0.491686	0.644323	0
0.319952	0.551155	0.413624	0.846738	0	0	0.0129115	0.15063	0.101483	1	0.123361	0	0	0	0	0.652694	0.188166	0		0.451949	0.326604	0.177903	0.374612	0.430914	0	0.151049	0.827491	0.810828	0.0357038	0.471076	0.301988	0.366864	0.821135	1	0.191119	0.271183	0.431018
0.089667	0	0	0	0	0.512865	0.594904	0.127472	0.464673	1	0.0521105	0	0	0	0	0.204984	0.0125116	0.643277		0.443256	0	0	0.0395741	0.279728	0.0819357	0	0	0.217713	0.405519	0.364354	0.718078	0.760355	0.701706	1	0.69084	0.3863	0.128919
0.130709	0.494767	0	0	0	0	0	0.4766	0.875094	1	0.64294	0.0167072	0.652114	0.238165	0.779607	0.420236	0.0930657	0.23483		0.224573	0.58432	0.580921	0.311826	0.1527	0.112245	0.194075	0.214222	0.847589	0.263725	0.44164	0.685959	0.372148	0.697263	1	0.370017	0.971391	0.754161
0.0507752	0.363081	0.537908	0.3204	0.735362	0.507978	0.434921	0.88597	0.566949	1	0.719056	0.206974	0.0391975	0.792547	0.768173	0.519752	0.0674624	0.0102791		0.133439	0.0164662	0.360145	0.181415	0.0508496	0.36477	0.251706	0.163048	0.389979	0.572703	0.976931	0.986948	0.481757	0.436786	1	0.284642	0.15813	0.050038
0.0994156	0	0.155501	0.155501	0.265451	0.720028	0.611241	0.159189	0.601038	1	0.850644	0.690205	0.242657	0.197368	0	0.0016713	0.0432221	0.210088		0.0219766	0.189349	0.456669	0.979848	0.993092	0.790652	0.639822	0.0959257	0.221382	0.047931	0.297777	0.318108	0.387699	0.629063	1	0.851264	0.349416	0.133047
0.505974	0.0843169	0	0	0	0	0.189782	0.0315934	0.599186	1	0.744601	0.180756	0.0778969	0.103126	0.183137	0.320299	0.633446	0.764283		0.803792	0.565604	0.0325389	0.138886	0.0811833	0.40168	0.869542	0.342832	0.11246	0.609778	0.210305	0.523724	0.314793	0.553891	1	0.388651	0.0651339	0.385488
0.652273	0.870534	0.449223	0	0	0	0	0	0.516621	1	0.179119	0.153722	0	0.0965507	0.27194	0.342862	0.401872	0.149751		0.0508966	0.0402094	0	0.0213258	0.0374294	0.0415016	0.103156	0.0242417	0.0166662	0.116837	0	0.0413981	0.17675	0.302531	1	0.598361	0.108033	0.0443026
0.0594734	0	0.0400503	0.242236	0.502938	0.627686	0.731895	0.520199	0.510699	1	0.530935	0.404603	0.358478	0.394127	0.0372249	0.0824936	0.0309993	0.0576066		0	0	0	0	0	0	0	0	0	0	0	0	0	0.951114	1	0.915213	0.207032	0
0.0337205	0.0144108	0	0	0.243993	0.330221	0.32473	0.526147	0.418762	1	0.0307014	0.054116	0.200116	0	0	0.0488632	0.089224	0.0185109		0.157466	0	0.208496	0.0339631	0	0.239226	0.188863	0	0	0.0949698	0.767581	0.339365	0.367394	0.459431	1	0	0.178468	0.459381
0	0	0	0	0	0	0.746919	0	0.726648	1	0	0	0	0	0	0	0.161661	0.397434		0.908522	0.0645307	0	0	0	0	0	0	0.183423	0.0609329	0.604147	0.637711	0.496031	0.237221	1	0.754549	0.158777	0.72566
0.101483	0	0	0	0.0609611	0.452854	0.171078	0	0.439252	1	0.766591	0.71667	0.3852	0.131571	0	0	0.0980049	0.133437		0	0	0.0454878	0.788105	0.05311	0	0.344824	0	0.0271786	0.295944	0	0	0	0	1	0.216241	0.38499	0.572261
0.204791	0.0117446	0	0.164564	0.430879	0.953934	0.731669	0.784434	0.837907	1	0.693056	0.342218	0.216326	0.382394	0.0339209	0.19226	0.372652	0.480367		0.799854	0.113454	0	0.0316587	0.204434	0.304945	0.507285	0.523449	0	0.80101	0.514571	0.46285	0.581596	0.94296	1	0.407557	0.377365	0.624303
0.268383	0.323943	0.39779	0.262387	0.215292	0.131146	0.256216	0.0807032	0.21624	0.258535	1	0	0.267376	0.131455	0.0815119	0.176561	0.0121464	0.0628601		0.0677859	0	0.666667	0	0	0	0	0	0	0	0	0	0.972973	0.972973	1	1	0	0.0547801
0.195303	0.0187841	0.396001	0.397617	0.473526	0.0122149	0.0331259	0.140708	0.342234	0.140969	1	0.913144	0.423171	0.0836227	0.0298496	0.0734245	0.0135758	0.00786782		0.0515751	0.0180657	0	0	0.369994	0.0160867	0.0117162	0.206177	0.121046	0.15227	0.130684	0.151687	0	0.246003	1	0.789223	0.161919	0.420745
0	0.0137245	0	0	0	0	0.0437204	0.00541513	0.0819767	0.188102	1	0	0	0.199188	0.118378	0.00601892	0.0190462	0.0469428		0	0.0329675	0.416672	0.0595246	0	0.0406153	0.0567137	0	0.259385	0.358151	0.297939	0	0.0225778	0.659715	1	0.485013	0.0777301	0.0795077
0.0714552	0.520884	0.466917	0.084894	0	0.26961	0	0.0421887	0.404923	0.283679	1	0.232848	0.0372195	0.226537	0.0218779	0.0394325	0.0128225	0.338308		0.296133	0.15536	0	0	0.124984	0.281883	0.812147	0.799794	0.0685538	0.337515	0.521194	0.869697	0.0536648	0.85065	1	0.613569	0.601085	0.579027
0.213985	0.106281	0.0426011	0	0	0	0.127951	0.570007	0.58566	0.622272	1	0.332036	0.0893204	0.340419	0.0612255	0.271	0.102358	0.556194		0.0981212	0.123499	0.251946	0.378029	0.0613019	0	0	0.058651	0.375497	0.76015	0.874691	0.801883	0.485633	0.86181	1	0.422318	0	0.138311
0	0.290706	0	0	0	0	0	0.375443	0	0.0918381	1	0.0658911	0	0.0779215	0.00343944	0.310482	0.256115	0.122028		0.733545	0.470844	0.470497	0.691604	0.556231	0.065439	0.0171072	0.276033	0.68645	0.748991	0.280872	0.418469	0.751277	0.997923	1	0.671256	0.621407	0.068746
0.128911	0.551503	0.262195	0.346314	0.424655	0.362631	0	0	0.016212	0.887765	1	0	0.182079	0.0929418	0	0	0	0.368507		0.276496	0.748561	0.763883	0.594152	0.987759	0	0.0467053	0	0.63687	0.598947	0.651587	0.0812938	0.0330219	0.858568	1	0.881076	0.253462	0.454897
0.907142	0.0195789	0	0	0.187601	0	0	0.138968	0.498883	0.518481	1	0.369714	0.265554	0.0610629	0.200153	0.577024	0.441616	0.169105		0.756775	0.283662	0	0	0	0.367778	0.430455	0.340768	0.558445	0.0624786	0.283471	0	0	0.411372	1	0.55667	0.278187	0.690256
0.170675	0.0179875	0	0	0	0	0	0	0	0.809205	1	0.590123	0.53111	0	0.449646	0	0	0.0791282		0.127655	0.770335	0	0	0	0	0	0.48287	0	0	0	0	0	0	1	0.5	0	0
0.164341	0.528241	0.0351016	0.845433	0.254044	0	0.356305	0.722609	0.0269718	0.192215	1	0.922759	0.0674552	0.139535	0.12515	0.21834	0.0166814	0.256178		0.0614452	0.341942	0	0	0	0	0	0	0.368495	0	0	0.184857	0.688519	0	0	1	0.0560836	0
0.00692043	0.113661	0	0	0	0.241335	0.0722814	0	0.446007	0.48028	1	0.228297	0	0.444146	0.172698	0.0136251	0.0234885	0.0278627		0.306121	0.237283	0.317178	0.119213	0.112616	0.471935	0.567753	0.697977	0.144764	0.0302296	0.121095	0.0392708	0.253341	0.186791	0.508579	1	0.838369	0.367718
0.193691	0.774172	0	0	0	0.646476	0	0.0590152	0.0444889	0.237405	1	0.19705	0	0.0614629	0.148813	0.365861	0.0193916	0.153704		0.0977712	0.100733	0.0713172	0.158866	0.0928567	0.00720578	0	0	0.0663985	0.114398	0.135384	0.11691	0.0151076	0.185875	0.362667	1	0.650353	0.637836
0.509208	0.133302	0.0347456	0.291725	0.309662	0.19356	0.103101	0.643818	0.97255	0.666496	1	0.113441	0.0282718	0.144963	0.0220775	0.0062959	0	0.0700167		0.505816	0.106509	0	0	0	0	0	0	0.177738	0.137697	0	0.600828	0.350483	0	0	1	0.201722	0.280355
0.299411	0.290708	0.385671	0.0617818	0.0843371	0.278727	0.397085	0.320096	0.721782	0.842548	1	0.334412	0.0481211	0.301194	0.0935805	0.0218694	0.168563	0		0.545685	0	0	0	0	0.541818	0.483317	0	0	0	0.213181	0.842122	0	0.0284045	0	1	0.747565	0.502455
0.173904	0.238406	0	0.209998	0.303406	0.195861	0.476769	0.41503	0.260191	0.274691	1	0.382724	0.6921	0.402304	0.220101	0.573045	0.215246	0.261981		0	0.338337	0.222317	0	0	0	0.284607	0	0.354267	0.499194	0.360014	0.313919	0.190753	0.435293	0.401236	1	0.920856	0.190805
0.117385	0.070031	0.143186	0.207051	0	0	0.0174161	0.000634589	0.0874127	0.240121	1	0.87214	0.409892	0.0292073	0.1287	0.117712	0.105616	0.531122		0.474215	0.623367	0.131423	0	0	0.061111	0.366666	0.476681	0.811097	0.804504	0.348867	0.0200994	0	0.164779	0.535491	1	0.0850913	0.157993
0.113149	0	0	0.0583629	0	0	0	0.0224986	0.341564	0.323736	1	0.286253	0.169277	0	0	0.523205	0.269965	0		0.13484	0.56369	0.155255	0.212727	0.118079	0.0464168	0.0349232	0.245293	0.696613	0.652406	0.446601	0.0933078	0.288289	0.0474467	0.302807	1	0.95306	0.619045
0.586068	0.255669	0	0.028551	0	0	0.388297	0.798838	0.227662	0.726329	1	0.352941	0	0	0.462142	0	0	0		0.565957	0.392539	0.785589	0.457321	0.0973724	0.0379485	0	0	0.344378	0.18562	0.038303	0.00590928	0.255584	0.47274	0.254597	1	0.96773	0.156366
0.877028	0.205742	0.0687923	0.242216	0	0	0.365672	0.0439159	0.234992	0.500948	1	0.158576	0	0	0.0558253	0.110692	0.40448	0.500504		0.525305	0.346039	0.093721	0.0394191	0.0174113	0.0299477	0	0	0.0905184	0.241576	0	0.0614629	0	0.0391219	0.169755	1	0.67415	0.696209
0.0313179	0.0049878	0.0914601	0.119505	0.0564897	0.26961	0.0429892	0.201341	0.574192	0.928182	1	0.261562	0.146644	0.180552	0.0627805	0.0236397	0.107113	0.165544		0.0199062	0.058793	0.311577	0.60344	0.143978	0	0.176139	0.310565	0.462099	0.359115	0	0.19662	0.269254	0.489685	0.912567	1	0.857	0.0343788
0.757414	0.0277266	0.343374	0.0818611	0	0	0.0566334	0.19094	0.249237	0.607443	1	0.414065	0.679336	0.199842	0.241882	0.361985	0.582002	0.124511		0.123028	0.207918	0.579099	0.188666	0	0	0.109863	0.536594	0.211011	0.0976865	0.0610054	0	0	0	0.0347328	1	0.462501	0.798344
0.906538	0.552524	0.161312	0.513383	0.0682007	0.0405669	0.070036	0	0.455051	0.0541413	1	0.452675	0.890065	0.70565	0.383991	0.195319	0.0552254	0.0555247		0.288177	0.0826575	0	0	0.030217	0.113314	0	0	0.0438811	0.116097	0.0278422	0	0	0	0.426769	1	0.452421	0.623499
0.0920672	0.871631	0.230213	0.0861371	0.534633	0.509146	0.858416	0.0194733	0.418077	0.21037	1	0.47807	0.389055	0.430384	0	0	0.471789	0.419009		0.523322	0.075496	0.15512	0.562312	0.539608	0.797926	0.0840067	0.356236	0.137457	0.387832	0.602993	0	0.171896	0.401091	0.409595	1	0.865138	0.123155
0.183843	0	0	0.0530895	0.0265448	0	0.0785578	0.40311	0.0812707	0.129335	1	0.885907	0.625648	0.263277	0.482675	0.223103	0.0900679	0.383713		0.0370078	0	0	0	0.348916	0.259853	0.0119629	0.00857519	0	0	0	0	0	0	0.112622	1	0.684366	0.394941
0.445418	0.705245	0.779852	0.750885	0	0.306859	0	0	0.638853	0.177128	1	0.966918	0.462595	0.111849	0.375419	0.100262	0.886148	0.264499		0.353994	0.499193	0	0	0.0745301	0	0	0	0.0301799	0.294424	0.551959	0.342141	0	0.385776	0.933829	1	0.157843	0.228456
0.120337	0.0531342	0.130065	0.152969	0.0114231	0.0294912	0	0.0586279	0.527394	0.42817	1	0.518835	0	0	0	0	0.121284	0.0799823		0	0.0618212	0	0	0.0401552	0	0	0	0.053493	0.427944	0.106986	0	0.0640572	0	0	1	0	0.0318143
0.0471907	0.190155	0.0952408	0	0.038488	0.407178	0.570474	0.709908	0.189595	0.389529	1	0.957847	0.20676	0.540194	0.852172	0.194594	0.0926207	0		0.300767	0	0	0	0	0	0	0	0	0	0	0	0	0	0.315422	1	0.491433	0.148067
0	0	0	0	0	0	0	0	0.729449	0	1	0	0	0	0	0	0	0		0	0.276403	0.454688	0.139335	0.607989	0.0581442	0	0.0770533	0.23116	0	0	0.49504	0.0105778	0.212088	0.208216	1	0.768708	0.304299
0	0.0148492	0	0	0	0.0585519	0.616791	0.298436	0	0.514713	1	0	0	0	0	0.104998	0	0		0.0814998	0.141195	0.338244	0.0132587	0.0419261	0.0463971	0.0645255	0	0.0577619	0.496867	0.761211	0.83988	0.559782	0.237466	0.340158	1	0.447382	0.221565
0.132773	0.0993511	0.116222	0	0.0815356	0	0	0	0.94886	0.213885	1	0.199438	0.598314	0.0854735	0	0	0.368037	0.207134		0	0	0	0	0	0	0	0	0	0.21076	0.0790349	0	0	0	0	1	0.306413	0.153482
0.342383	0.468591	0.247891	0.35876	0.392466	0.335356	0.685377	0.406675	0.524142	0.784358	1	0.366776	0.185559	0.302698	0.303187	0.092395	0.0855921	0.118482		0	0	0	0	0	0	0	0	0.423088	0	0	0.282753	0	0	0	1	0.655069	0.00399737
0.0330526	0.114534	0.234703	0.414808	0.144304	0.0155686	0	0.286007	0.416959	0.507138	1	0.330409	0.00815708	0.0833731	0.0452986	0.0481565	0.081681	0.0684124		0.111486	0.0264384	0	0	0	0.00868056	0	0.111455	0.580299	0.616885	0.398055	0	0.0954762	0.788511	0.680973	1	0.256912	0.00776427
0.39061	0	0	0.124891	0.00341582	0	0.170225	0.355842	0.0165894	0.356053	1	0.74372	0.828733	0.533491	0.634858	0.664187	0.567856	0.107177		0.0219849	0	0	0.153527	0.545065	0.26888	0.0223437	0.647967	0.912948	0.504694	0	0	0.0555012	0	0.102184	1	0.685282	0.133314
0.0320937	0.0808273	0	0	0.513081	0.0537513	0	0.17444	0.213046	0.520277	1	0	0	0	0	0	0	0.0346672		0.512494	0	0	0	0	0	0	0	0	0	0	0	0	0	0	1	0.555965	0.284142
0.418518	0.259112	0.865548	0.0582392	0.028569	0.0210481	0	0	0.25198	0	1	0.234643	0.0525154	0	0	0.323658	0	0		0.384563	0.165383	0	0.0685269	0.508946	0.636182	0	0.185049	0.422062	0	0	0	0	0	0.035267	1	0	0.361801
0.391685	0.545411	0.0117741	0.211957	0	0.625721	0	0.525309	0.780862	0.958295	1	0.240598	0	0.333819	0	0.561705	0.147064	0.182779		0	0	0	0	0	0	0	0	0	0.957761	0	0	0	0	0	1	0	0.204291
0.703662	0.0595624	0.0815701	0	0.0359497	0.371585	0	0	0.218903	0.665829	1	0	0	0.270378	0	0.0741852	0.640198	0.444171		0	0	0	0	0	0	0	0	0	0.201353	0	0	0	0	0	1	0.0949451	0
0.160102	0.756677	0.50687	0.212504	0.0244801	0.0441326	0.291324	0.473717	0.337513	0.389016	1	0.254586	0	0.0950048	0	0.0415488	0.0992163	0.0216072		0.636966	0.401149	0.16454	0.131438	0.339848	0.194199	0.634271	0.868859	0.800425	0.913544	0.607856	0.121571	0	0	0	1	0.782718	0.582157
0.0762565	0.0729408	0.307379	0.0523862	0.109357	0.227405	0.121283	0.231481	0.121715	0.738519	1	0.814959	0.608647	0.238209	0.838514	0.143599	0.378233	0.146637		0.522582	0.0613452	0	0	0.135285	0.225475	0.184987	0	0	0	0	0.43225	0.230125	0.291165	0.29871	1	0.88176	0.657103
0.269505	0.267579	0.566889	0.645462	0.524145	0.688503	0.354814	0.0255739	0.0504112	0.470824	1	0.494624	0.363677	0	0	0.0410033	0.214749	0.153459		0.102623	0.2423	0.290538	0.363676	0.40125	0.195492	0.530414	0	0.614004	0	0	0	0	0.167742	0.0230491	1	0.636073	0.0255345
0.485044	0.956278	0.666111	0.448968	0.179587	0.207921	0.885426	0.811861	0.579808	0.695003	1	0.804766	0.375825	0.691163	0.443538	0.218531	0.422198	0.721986		0.00201782	0.0623185	0.097122	0.127858	0.281287	0	0.0386199	0.0987276	0.227305	0.146093	0.116784	0.477321	0.858581	0.795476	0.840684	1	0.676513	0.10463
0.129491	0.685578	0.927528	0.831306	0.47345	0.489926	0.402543	0.151253	0.106622	0.453226	1	0.903023	0.78335	0.277193	0.17539	0.230571	0.161804	0.00127642		0.751334	0.672399	0.572942	0.0730603	0.840702	0	0.229067	0.842124	0.694771	0.261847	0.0953392	0.482408	0.269501	0.278407	0.336528	1	0.180774	0.17069
0.274992	0.239918	0.0421573	0.0159825	0	0.00712112	0.0632989	0.0648768	0.156155	0.845894	1	0.258905	0.262049	0.205804	0.113322	0.303495	0.00958715	0.0763728		0.25497	0.0237379	0.159873	0.00353145	0	0.115932	0.0751005	0.244864	0.71157	0.641482	0.385975	0.318034	0.595009	0.759792	0.790191	1	0.579889	0.212884
0.672242	0.624219	0.280583	0.500347	0.242567	0.190589	0	0	0.217292	0.992809	1	0.338983	0	0.040425	0	0.121518	0.208087	0.208559		0.107396	0.175947	0.00259487	0.113394	0.369175	0.168012	0.276475	0.600761	0.411729	0.346357	0.0893533	0.140688	0	0	0.751098	1	0.643619	0.26382
0.924168	0.410129	0.932604	0.0631643	0	0.0475761	0	0.122438	0.165134	0.341128	1	0.0433117	0.0165891	0.705516	0	0.0441611	0	0.242693		0.0380425	0.479542	0.103779	0.136562	0	0	0	0.677789	0.670847	0.112177	0.652322	0.813515	0.715067	0.53543	0.410778	1	0	0
0	0	0.0766288	0.114943	0.326993	0.3549	0.258342	0.126859	0.0576965	0.667639	1	0.649843	0.879872	0.275821	0.246557	0	0.367501	0.318044		0.027537	0	0	0	0	0.170558	0.282932	0.187956	0.616081	0.431769	0.0997261	0.183226	0.0758416	0	0.0622544	0.228462	1	0.232162
0.344458	0.194432	0.47086	0.172945	0.1415	0.0594498	0	0.0779817	0.0461312	0.486836	1	0.97502	0.498921	0.136069	0	0.56073	0.25777	0.174623		0.409288	0.637993	0.601698	0.0920307	0.0387614	0.0189322	0	0	0.0122245	0.0737017	0.112629	0	0	0.199816	0.32399	0.63681	1	0.832206
0	0	0	0	0	0	0	0	0.036245	0.558174	1	0.327814	0	0.0933624	0.326769	0.314515	0	0		0.315156	0	0	0	0	0	0	0	0.55678	0.709318	0	0	0	0	0	0	1	0.0567258
0.0798705	0.958445	0.867165	0.827748	0.206937	0	0	0	0.266299	0.772553	1	0.410459	0	0	0	0	0	0.0042288		0.470098	0.632208	0.11152	0.337909	0.157028	0.0898626	0.274046	0.12577	0.599485	0.511572	0.0873259	0.446856	0.426035	0.513352	0.0748413	0.409758	1	0.954276
0.388828	0.297015	0.136705	0.150126	0.0676976	0.248237	0.210784	0.153358	0.240631	0.894315	1	0.239939	0	0	0	0	0.0589139	0.343452		0.52331	0.465059	0.598818	0.485162	0.554166	0.332453	0.145987	0.418641	0.436968	0.574907	0.65943	0.164452	0.522861	0.480379	0.472978	0.447556	1	0.363359
0.440301	0.448726	0.00557081	0.0617075	0	0	0	0.0734103	0.170318	0.359121	1	0.542372	0.380617	0	0	0.0988191	0.468134	0.0939942		0.173334	0.138899	0.145422	0.143598	0.294228	0.325686	0.490035	0.270201	0.828928	0.279331	0.0210213	0	0	0.0146014	0	0.454218	1	0.124196
0.216689	0.0364336	0	0	0	0.0253883	0	0.0234056	0.133853	0.811898	1	0.380607	0.204211	0.188712	0.184153	0.201648	0.0742541	0.0841358		0.227437	0.102947	0	0	0	0	0	0	0.0932572	0.380858	0.388035	0	0	0	0	0.143093	1	0.879274
0.0958415	0.70411	0.126616	0.376433	0.259391	0.206514	0.0838174	0.0120895	0.45288	0.29836	1	0.617186	0.418566	0.125006	0.540378	0.31438	0.0996696	0.212854		0.275132	0.47623	0	0	0	0	0	0.567432	0.677619	0.0981313	0	0	0	0	0	0.152835	1	0.122322
0.421602	0.263714	0.684386	0.923821	0.721839	0.662419	0.591537	0.376708	0.271625	0.858468	1	0.0940376	0.206791	0.387035	0.86558	0.613745	0.744181	0.371752		0.212056	0.64975	0.26635	0.544689	0	0	0	0	0.148078	0.253107	0.246785	0.664776	0.0511366	0	0	0	1	0
0.0467584	0.329311	0.139027	0.0381112	0.43853	0.344887	0.229234	0.0628828	0.184599	0.223907	1	0.973873	0.525003	0.350712	0.268539	0	0	0.133649		0.432404	0.0293191	0.0690631	0	0.11567	0.180433	0.206362	0.503313	0.947641	0.387599	0.196027	0.381812	0.563716	0.8738	0.918812	0.777173	1	0.304442
0.568109	0	0	0	0	0.0419435	0.702608	0.302735	0.40024	0.404388	1	0.811093	0.575294	0	0	0.145115	0.315207	0.085149		0.289314	0.290326	0.376349	0	0	0.02512	0.409282	0.0872387	0.0696065	0.54471	0.198912	0.13986	0.431849	0.297615	0.285245	0.612524	1	0.704655
0.896612	0.862334	0.511714	0.70837	0.642983	0.297946	0.262605	0.0333228	0.0131196	0.101603	1	0.213707	0.284723	0.465969	0.12997	0.0851999	0.0590594	0.0116499		0.279687	0.556634	0.118921	0.0854121	0.526323	0.526323	0.111984	0.0513718	0.136777	0.69636	0.764027	0.707239	0.0534623	0.324263	0.44099	0.685349	1	0.41569
0.134376	0.708969	0.866323	0.742701	0	0.0376583	0.180838	0.576051	0.141644	0.171307	1	0.935362	0.723847	0.428032	0.670902	0.403325	0.034045	0.0651982		0.196639	0.121674	0.355329	0.331375	0.110991	0	0.0798811	0.207691	0.0535976	0	0	0	0	0	0	0.190273	1	0.56668
0.0105002	0.278024	0.41969	0.286094	0.264637	0.894218	0.737731	0.538037	0.196679	0.986697	1	0.725828	0.487352	0.28443	0.180154	0.199542	0.552844	0.285587		0.405093	0.475079	0.0400377	0	0.0292735	0.0852891	0.0567695	0.0433512	0.735694	0.637241	0.0595091	0	0.0762986	0.329379	0.559028	0.518403	1	0.733368
0.035729	0.3439	0.865062	0.865062	0.0769154	0.364852	0.240087	0.229971	0.347455	0.83783	1	0.775308	0.279643	0.453855	0.425182	0.203135	0.0449041	0.0904108		0.452136	0.280415	0.137505	0.377371	0.401517	0.710689	0.157821	0	0.395691	0.722013	0.306572	0.102473	0.141473	0.183835	0.0753921	0.395201	1	0.473136
0.252171	0	0	0	0	0	0.149222	0.147023	0	0.591917	1	0.580184	0	0	0	0.251002	0.196096	0		0	0	0	0	0.484263	0	0	0	0.395752	0.857463	0.857463	0.93927	0	0	0.602418	0.722902	1	0.460176
0.165812	0.140985	0	0.303569	0.121907	0.0136584	0.0690587	0.24423	0.173761	0.118765	0.309604	1	0.684421	0.0759833	0.225071	0.496178	0.363363	0.239285		0.275045	0.194283	0.0511867	0	0.0381276	0.0607387	0.0119409	0	0	0.0230547	0.115274	0.208421	0.2672	0.63434	0.313353	0.642414	1	0.250024
0.260211	0.301651	0.008745	0.118982	0.158484	0	0.0163783	0.00760319	0.200391	0.111128	0.289616	1	0.462924	0.119326	0.230897	0.623345	0.681124	0.374958		0.107686	0.0796398	0.246258	0.082055	0.0439376	0.0519727	0.0512175	0.00462909	0.14656	0.219451	0.0377318	0.100618	0.0220869	0.0352798	0.100434	0.561181	1	0.901536
0.242304	0.634159	0.274644	0	0.00695846	0.876712	0.511445	0.251717	0.105504	0.174504	0.406951	1	0.412367	0.212685	0.0957049	0.00467808	0.00456843	0.00749746		0.00220666	0.0215088	0.281585	0.157615	0.0532203	0.12159	0.165251	0.205219	0.182229	0.205576	0.442512	0.320603	0.197937	0.378779	0.431802	0.359871	1	0.497334
0.306358	0.022295	0.0957322	0.0496241	0.0759867	0.184279	0.386183	0.00822023	0.183281	0.212867	0.702599	1	0.347253	0.0645639	0.030784	0.240938	0.434128	0.121615		0.195208	0.01378	0.0350858	0	0.105572	0.222697	0	0	0	0	0	0	0.0368769	0.566933	0.566704	0.841262	1	0.338988
0	0.0473061	0	0	0	0	0	0	0.18329	0.0356329	0	1	0	0.0638716	0	0	0	0		0.310944	0.0500431	0	0	0.217409	0.475582	0	0.147549	0.540766	0.739463	0.589018	0.0420727	0.0848328	0.678662	0.186751	0.196193	1	0.38775
0.145224	0.180195	0.469111	0.243978	0.159085	0	0	0.119681	0.144046	0.170412	0.710149	1	0.889866	0.687506	0.76392	0.484032	0.159122	0.271462		0.00350046	0.235839	0.545472	0.313549	0.0347019	0.176257	0.273249	0	0.282169	0.0717807	0.0384539	0	0	0	0	0.901762	1	0.941451
0.179438	0.0965481	0.220651	0.316576	0.413465	0	0	0.419811	0.183855	0.138008	0	1	0.434595	0.71256	0.644056	0.831033	0.152379	0		0.244858	0.107611	0.329545	0.284554	0.124266	0	0	0	0.0444054	0.053962	0	0	0.0753201	0.134082	0.201193	0.623021	1	0.473221
0.32529	0.0696009	0.850883	0.625373	0.365169	0.146742	0.0546327	0.0874586	0.0704969	0.670616	0.247119	1	0.525793	0.483486	0.300936	0.120276	0.0318371	0.305632		0.245053	0.161931	0.355001	0.240103	0.0482798	0.27516	0.181916	0.111276	0.683633	0.75544	0.126118	0	0.289682	0.418346	0.643126	0.653261	1	0.402217
0.0294346	0.290013	0	0	0	0	0.083246	0.0193581	0.0388023	0.0322391	0	1	0	0.0179353	0	0.276208	0.0254202	0		0.330948	0.272855	0.24433	0.233069	0.27228	0	0.028213	0.0844658	0.0227255	0.112179	0.140722	0	0	0.234212	0.00749412	0.31615	1	0.258277
0.969009	0.101554	0.0734129	0	0.602732	0.151265	0	0	0.0244215	0.886894	0.52098	1	0.664484	0.12314	0.151587	0.232569	0	0.578091		0	0.232086	0.714248	0.900776	0.876431	0.882306	0.628835	0.0542271	0.0338919	0.011339	0.419543	0	0	0	0	0.554784	1	0.625025
0.100411	0.171678	0.352087	0.23809	0.0646152	0	0	0.256876	0.215964	0.666083	0.253632	1	0.665949	0.427792	0.694256	0.217019	0.0434485	0.187577		0.240035	0	0	0	0.257127	0	0	0	0	0	0	0	0	0.379107	0.364899	0.217566	1	0.103457
0.360773	0.0431896	0.0721744	0.121457	0.0798267	0.346369	0.0848005	0	0.148906	0.404797	0.637879	1	0.755564	0.228225	0.0145218	0.168679	0.22493	0.0240727		0.0170213	0.137258	0	0.217316	0.509768	0.366711	0	0	0	0	0	0	0	0	0.0273408	0.672203	1	0.227061
0.00739767	0.227245	0.732071	0.27029	0.97534	0.297343	0.520707	0.247598	0.118537	0.138578	0.228753	1	0.371845	0.794773	0.625419	0.754972	0.95887	0.300664		0.660571	0.519038	0	0	0.250492	0.842336	0.932704	0.932704	0.0143493	0.270326	0.880091	0.880091	0.740585	0.601689	0	0	1	0.934608
0.50613	0	0.39355	0.338954	0	0	0.291353	0.0371492	0.00802066	0.123795	0.0755556	1	0.49348	0	0	0	0.65718	0.799607		0.0431214	0.0497423	0	0	0	0	0	0	0.0570726	0.741944	0.741944	0.148389	0	0	0	0.485237	1	0.375432
0	0.0799599	0.300123	0	0	0	0	0	0	0.663542	0	1	0.83779	0	0	0.899482	0	0		0.127406	0.201665	0.0533826	0	0.317679	0.357772	0.125143	0.025061	0.19137	0.546373	0.193061	0.0386122	0.0463647	0.269107	0.238291	0.538106	1	0.203691
0.173235	0.127976	0.0456178	0.0900118	0.0580422	0.0634873	0	0	0.238978	0	0.223267	1	0.244176	0.288069	0.161611	0.064445	0.219778	0.00487168		0.0173461	0.129833	0.00921991	0.226264	0.642405	0.299522	0.891646	0.238199	0.317903	0.796611	0.836626	0.397018	0.817465	0.787591	0.539891	0.539891	1	0.679822
0	0	0.0271742	0.125338	0.0426902	0.0075322	0	0	0	0	0	1	0	0	0.66789	0.163475	0.731693	0.417506		0.0040875	0	0	0	0	0.00345322	0.160732	0	0.158508	0	0	0.0376261	0.107025	0	0.0507811	0.352811	1	0.176123
0.233736	0.783341	0.726521	0.839626	0.402403	0.394457	0.571383	0.480255	0.306232	0.253777	0.779285	1	0.710636	0.508062	0.393888	0.162258	0	0.111165		0.236733	0.0837986	0.241529	0.0562179	0.281516	0.440519	0.203909	0.203909	0.0509771	0	0.0691789	0.0592962	0.0433886	0.297206	0.132917	0.385141	1	0.36687
0.66475	0.874734	0.787112	0.203035	0.119303	0.0168184	0.0630983	0.520594	0.374784	0.95	0.369866	1	0.753409	0	0.389435	0	0.237242	0.587742		0	0.0242789	0.194141	0.00416353	0	0	0.0202457	0.405238	0.984248	0.90357	0.353945	0.239839	0.251101	0.278541	0.457147	0.921533	1	0.482623
0.725567	0	0	0.810067	0	0.00820283	0	0	0.726309	0.0312518	0.923077	1	0.5	0.29127	0.585943	0.0334257	0	0.190246		0	0	0	0	0	0	0	0	0.452371	0	0	0	0	0	0	0.648015	1	0
0.405548	0.00784316	0.343778	0.234989	0	0.018535	0.131805	0	0.138064	0.115904	0.094979	1	0.157473	0.0975461	0.547157	0	0.743667	0.0111724		0.284922	0	0	0	0	0.247926	0.349143	0	0	0.0869049	0.223958	0	0	0	0.152635	0.241547	1	0.614901
0.0200557	0.365152	0.412813	0.0277263	0.255082	0.0584562	0	0.0287153	0.0544251	0.00377082	0.256089	1	0.727728	0.084489	0.0623919	0.0263852	0.0826578	0.154301		0.058029	0.0303957	0.34509	0.296172	0.0684379	0.136439	0.105409	0.013303	0.0423221	0.139078	0.0302463	0	0.227895	0.150277	0.0291273	0.516148	1	0.642717
0.999513	0.0509347	0.264514	0.1886	0.112566	0.301912	0	0.433783	0.327252	0.357805	0.136748	1	0.38373	0.213094	0.196458	0.668419	0.368196	0.239043		0.437755	0.187435	0.0160436	0.17677	0.92336	0	0.188397	0.587707	0.323819	0.0305093	0.483892	0.805195	0.351849	0	0	0.564969	1	0.480391
0.0104117	0	0.0337296	0.113504	0.226017	0.360647	0.117265	0.137178	0.425039	0.468551	0.583289	1	0.924387	0.727741	0.417043	0.369659	0.155427	0		0.153064	0.726091	0.753022	0.400584	0.246866	0.252139	0.241015	0.146742	0.395881	0.582877	0.367823	0.39145	0.391632	0.338036	0.641426	0.977542	1	0.314334
0.0274259	0	0	0	0	0.0872974	0	0	0.332671	0.115808	0.468991	1	0.698379	0	0	0.270448	0	0.212746		0	0	0	0	0	0	0	0	0.129431	0	0	0	0	0	0	0	1	0.373924
0.150364	0.0443431	0.62875	0.0775954	0	0.338431	0.0534365	0	0.122312	0.0311355	0.399772	1	0.556825	0.352977	0	0.53826	0	0		0.41348	0.132685	0.263504	0	0	0	0.0831561	0	0.114088	0	0.183011	0	0	0	0	0.0440251	1	0.30249
0.194779	0	0	0	0	0	0	0	0	0	0	1	0	0	0	0	0	0.0681201		0.131194	0.122237	0.0900702	0.248662	0.775966	0.33155	0	0	0.152247	0.245249	0	0	0	0	0.189876	0.665278	1	0.251295
0.451522	0.0534844	0.0548316	0	0	0.419864	0.178537	0	0.11479	0.724109	0.81264	1	0.599795	0	0.0421258	0.0148773	0.436129	0.637093		0.311782	0.187161	0.129452	0.399143	0.51962	0.674142	0.415398	0	0	0.192001	0.468955	0	0	0	0.126595	0.170598	1	0.335762
0.0552208	0.126907	0	0	0	0	0	0	0	0	0.816555	1	0	0	0	0	0	0		0.195645	0.119288	0.182136	0.486901	0.386673	0.214527	0.524605	0.290997	0.566912	0.34068	0.409178	0.0654374	0.0852441	0.0461488	0.132269	0.672355	1	0.721328
0.473779	0.868594	0	0	0.230476	0.0441543	0	0	0.335944	0.134723	0.77454	1	0	0	0	0	0	0.27278		0.0977661	0.00828438	0	0	0	0	0	0	0.0809506	0.242552	0.0816772	0	0	0	0.221738	0.841233	1	0.256135
0.799494	0.191161	0.661689	0.680409	0.469449	0.326268	0.114592	0.260824	0.446549	0.366608	0.710877	1	0.242082	0.712778	0.0723944	0.214399	0.280287	0.0486556		0.649501	0.274133	0.101725	0.0678863	0.29702	0.138737	0	0	0.24371	0.355348	0.078379	0.0435439	0.186897	0.235137	0.0904373	0.117569	0.0156758	1
0.531898	0.794508	0.0886556	0.0504208	0.0981951	0.226501	0.0188391	0.0584026	0	0.063378	0.534901	1	0.254261	0.33874	0	0.147247	0	0.135244		0.368869	0.1823	0.383416	0	0	0	0	0	0	0.108821	0	0	0.128653	0	0	0	0	1
0.154201	0.164024	0.566	0.415782	0.0173072	0.577421	0.0790393	0.00982431	0.0982481	0.0620685	0.864737	1	0.520632	0.750834	0.367246	0.543937	0.158648	0.144232		0.768603	0.0989492	0.0811274	0	0	0	0	0	0.296296	0.56256	0.782291	0.733981	0.550486	0	0	0.130927	0.598212	1
0.604982	0.0845445	0.118956	0.166847	0.00749417	0.305993	0.0808053	0.115321	0.0943901	0.461659	0.884341	1	0.221847	0.0529521	0.0646202	0	0.251524	0.0338224		0.0732356	0.256475	0.0436803	0	0.259717	0.168969	0	0	0.251392	0.0355211	0	0.166708	0.00153884	0	0	0.323335	0.804075	1
0.0707567	0.197594	0.0853817	0	0.0375081	0.390974	0.223201	0.0500276	0.00113212	0.0321008	0.344548	1	0.173195	0.0305408	0.036649	0	0.00212102	0.0585605		0.854868	0.344714	0	0	0.260634	0.43439	0.504693	0.217195	0.254734	0.492195	0.692223	0.608634	0.0437971	0	0	0.222602	0.0586888	1
0.50127	0.838822	0.137671	0	0	0	0.0108535	0.125525	0.478267	0.170647	0.323754	1	0	0	0.43867	0.176718	0.198222	0.0871323		0.78783	0.767359	0.284565	0.212452	0.216288	0.191228	0.0289415	0	0.177092	0.198175	0.138517	0	0.0232856	0	0	0.099058	0.0684643	1
0.0768774	0	0.329011	0.743656	0	0	0.0474718	0	0.315453	0.376189	0	1	0	0	0	0	0	0.874801		0.807744	0	0	0	0	0	0	0	0.64873	0.641168	0.221585	0	0	0	0	0	0	1
0.279632	0	0	0	0	0	0.0170181	0.269281	0.191818	0.58749	0.295326	1	0	0	0	0	0	0		0.531674	0.4937	0.568657	0.853697	0.708855	0.41255	0.325378	0.606467	0.637889	0.154538	0.199747	0.367239	0.244957	0.251687	0.0125889	0.0317722	0.00981779	1
0	0.968165	0.505672	0	0	0	0	0.291079	0.2618	0.0152112	0	1	0.262763	0	0	0	0	0.210824		0.402501	0	0	0	0.0164298	0.125962	0.34482	0	0.656797	0.875463	0.0632696	0.109089	0	0	0	0	0	1
0.131119	0.212043	0.168403	0.387289	0.39078	0.155489	0	0.0357207	0.24138	0.455605	0.489955	1	0.989252	0.280787	0	0.586403	0.867247	0.674741		0.582913	0.452471	0.0933123	0.0706141	0.116223	0.221582	0.0409917	0	0.12104	0.0673178	0.237068	0.0590045	0.170752	0.0893231	0.183618	0.252227	0.168273	1
0.333318	0.086713	0.0029455	0	0	0	0	0.0455272	0.144667	0.238154	0.277925	1	0.148442	0.0464819	0.388802	0.0513138	0.17937	0.023543		0.701008	0.133561	0	0.112934	0	0.314417	0.438081	0	0.921456	0.289899	0.0415446	0.21267	0.0991222	0.550963	0.669666	0	0	1
0.0690342	0	0.0237913	0	0.0176349	0.724179	0.497634	0.209076	0.0995291	0.0670207	0.117652	1	0.073374	0	0	0	0.00916626	0.221614		0.303968	0.867804	0.395947	0.41066	0.336881	0.237136	0.1048	0	0.0872936	0.309794	0.0630769	0.189231	0.189231	0.206947	0.223544	0.0788393	0.0648836	1
0.21429	0	0	0	0	0	0.118372	0.0883282	0.0319339	0.342701	0	1	0	0	0.199948	0	0.246144	0		0.936279	0.0164959	0.184458	0.164697	0	0	0	0.345283	0.184875	0.221004	0.491415	0	0	0	0.304139	0.190087	0	1
0.248698	0.0504052	0.177273	0.592728	0.471249	0.751507	0.334888	0.246683	0.221118	0.537828	0.92836	1	0.573742	0.0779774	0	0.17589	0.139263	0.0874057		0.78024	0	0.0566057	0.466997	0	0	0	0	0.0527738	0	0	0	0	0	0.077222	0	0	1
0.15706	0.159715	0.433608	0.812146	0.598338	0.791615	0.668636	0.456686	0.553212	0.785657	0.759578	1	0.535132	0.326291	0.102423	0.140076	0.157721	0.0796546		0.400108	0.457637	0.182168	0.228878	0.102621	0.109971	0.150984	0.0921776	0.041178	0.0990327	0.0508377	0	0.0351333	0	0	0.184968	0.255252	1
0.214819	0.603062	0.899827	0.922528	0.402507	0.452264	0.523861	0.465223	0.338258	0.59144	0.958553	1	0.524726	0.303113	0.364366	0.577119	0.207566	0.114488		0.579321	0.191114	0.0728043	0.0743846	0.254026	0.137719	0.026668	0.210303	0.314545	0.440102	0.0656034	0	0	0	0	0.0633403	0.0728929	1
0.292007	0.205433	0.543472	0	0	0	0	0.121483	0.460422	0.0165305	0	0.739396	1	0.336928	0	0.00770208	0.0676667	0.120169		0.388124	0	0	0	0	0	0	0	0.326601	0.602237	0.0518824	0.0288236	0.131436	0.155647	0.0598643	0.0778237	0.0103765	1
0.280888	0.231402	0.245005	0.653326	0.0934384	0.367383	0	0	0.0858604	0.183838	0.072123	0.570682	1	0.378749	0.106218	0.0319222	0.0135839	0.0195425		0.717962	0.851805	0.363197	0.093314	0.284757	0.0691547	0.0978847	0.262676	0.386773	0.523541	0.514555	0.141208	0	0.0272366	0.0870293	0.31709	0.10427	1
0.0273043	0.112253	0.101433	0	0	0	0.0108937	0.0569618	0.0627797	0.0174292	0.0396506	0	1	0.884368	0.00491155	0	0	0.0640781		0.087179	0.0501844	0.277279	0.056191	0	0.0448459	0.128131	0	0.0181704	0.0705753	0.032634	0.476811	0.181144	0.155584	0.0268911	0	0	1
0.130276	0.267256	0.207599	0	0	0	0.194066	0.20055	0.45281	0.479149	0.59262	0	1	0.999421	0	0.0268129	0.29668	0.366811		0.25274	0.190497	0	0	0	0	0	0.172148	0.555352	0.615869	0.0872239	0	0	0	0	0	0	1
0.24013	0.00545313	0.237615	0	0	0	0	0.0143657	0.254747	0.00914967	0.311799	0	1	0.731056	0.658274	0.130596	0.248046	0.399172		0.272049	0.175859	0.252605	0	0	0	0	0	0.820844	0.181567	0.481686	0.23115	0.095306	0.104015	0.0400058	0.245264	0.339165	1
0.106118	0.0859227	0	0	0	0	0.103782	0.280401	0.0686842	0.0175399	0	0.3	1	0.029459	0.0116647	0.00612254	0.00872296	0		0.551275	0	0.369599	0.174239	0.00238043	0.371679	0	0	0.0623242	0.226444	0	0	0.0135658	0.0967142	0.119206	0.0846924	0.0382763	1
0.246564	0.193735	0.252484	0.564561	0.294683	0.19058	0.243474	0.12907	0.244425	0.338573	0.849491	0.929078	1	0.802902	0.818247	0.468548	0.619667	0.292329		0.0698439	0.137348	0.283876	0.0371745	0	0	0	0.0206083	0.0791274	0.354335	0.455726	0.0322522	0.294326	0.192317	0.0152292	0.137062	0.660946	1
0.495924	0.446474	0.827611	0.313941	0	0	0	0.411824	0.196383	0.463688	0.728105	0.423028	1	0.547819	0.284415	0.464256	0.484114	0.390265		0.111429	0.139082	0.0780971	0.0922036	0.272125	0.222647	0.126755	0.0492937	0.184586	0.538237	0.0459869	0.157191	0.0957882	0.326702	0.041486	0	0.203672	1
0.0608707	0.167521	0.0339719	0.00193918	0.0261177	0.00920784	0.0172503	0	0.131584	0.039964	0.305128	0.825163	1	0.706516	0.764378	0.398921	0.15339	0.0768787		0.187772	0.0400701	0.136823	0.665908	0.311642	0.640205	0.773736	0.280383	0.418285	0.393099	0.212143	0.0178621	0.0580519	0	0.00705485	0.0673976	0.217041	1
0.580205	0	0.0969647	0.225434	0	0.396714	0.727309	0.575137	0.439383	0.934412	0.776673	0.812285	1	0	0.891071	0	0	0.597975		0.290722	0.199922	0	0.159933	0	0	0.0398353	0.0873581	0.0936442	0.137022	0.0825222	0	0	0	0.0215952	0	0.309847	1
0.769508	0.720995	0.985927	0.599697	0.390328	0.163658	0.0603483	0.172134	0.404245	0.297562	0.929926	0.628284	1	0.362497	0	0.194556	0.561946	0.11064		0.232652	0.206976	0.519368	0.456635	0.137133	0	0.0569295	0.0794765	0.0409263	0.0744396	0.217522	0.063013	0	0	0	0.270975	0.104373	1
0.0264829	0.116399	0	0	0	0.0261045	0	0.0635416	0.380665	0.0521817	0	0.463326	1	0.908567	0.171465	0.718793	0.231132	0.176165		0.681358	0.363487	0.557347	0.12384	0.143561	0.449082	0.115005	0.192584	0.178997	0.421651	0.125516	0	0	0	0.216662	0.0176056	0.0977001	1
0.0786965	0.0823246	0	0	0	0	0.174123	0	0.109116	0.0324266	0.702301	0.595798	1	0.954915	0.954915	0.77242	0.339544	0.219031		0.603136	0.104595	0.176026	0.151558	0.0694227	0.98024	0.24675	0	0.286089	0.642624	0.386194	0	0	0	0.0630373	0.379642	0.207348	1
0.199467	0.149933	0.432441	0	0.482858	0.213618	0.136284	0.346702	0.194203	0.13859	0.967198	0.695786	1	0	0.36619	0	0	0.177166		0.541988	0.92292	0	0.0978272	0.0484025	0	0	0	0	0.0056567	0.0743233	0.289356	0.781262	0	0	0	0	1
0.710436	0.79701	0.110812	0.244597	0.14251	0	0.3062	0.803601	0.909682	0.473366	0.301863	0.415016	1	0.420669	0.252592	0.34799	0	0		0.0720169	0.356996	0.218979	0.211043	0.0882621	0	0.0238671	0	0.357512	0.07503	0	0	0	0	0.0911013	0	0.0310872	1
0.0952059	0.104744	0.160059	0.0471935	0.537408	0.881452	0.582317	0.0958881	0.278812	0.147758	0.214919	0.0933343	1	0.576842	0.0167897	0.390943	0.346936	0.0166938		0.584138	0.922561	0.429182	0.0572094	0.0431956	0.22746	0.412116	0.173627	0.666105	0.478656	0.243878	0.06211	0.622523	0.830031	0.0691692	0.875426	0.621634	1
0.230751	0.0392956	0.135098	0.269704	0.0844373	0	0	0.119317	0.156703	0.039852	0.158181	0.630644	1	0.584854	0.229091	0.214426	0.841656	0.127346		0.742418	0.667889	0.435272	0.743564	0.0984973	0	0.228701	0	0.0560265	0.136089	0.0698466	0	0	0	0.245525	0.776482	0.241476	1
0.313478	0.642437	0.171942	0.124287	0	0.0212188	0	0.0379855	0.34974	0.276905	0.271037	0.93637	1	0.208682	0.125209	0	0	0.141131		0.112811	0.887013	0.13222	0.0634	0.0376536	0.147604	0.28873	0.438296	0.212318	0.0913997	0	0.0462932	0.313369	0	0	0	0.669409	1
0.126265	0.0581045	0.281845	0.175228	0.310722	0.514567	0.188857	0.202625	0.0169892	0.0392842	0.282758	0.610676	1	0.438386	0.599733	0.416498	0.495766	0.390674		0.425964	0.108818	0.128607	0.183986	0.190116	0.124368	0.330444	0.245388	0.103615	0.331888	0.562653	0.541226	0.490834	0.49917	0.157113	0.412964	0.225322	1
0.214046	0.151613	0.195182	0	0.00899079	0.00387549	0	0	0.351973	0.328019	0.157207	0.337568	1	0.585438	0.933162	0.979258	0.776432	0.096717		0.829194	0.0748744	0.351451	0.277023	0.202985	0.215776	0.274877	0.0327853	0.262612	0.215964	0.251396	0.25507	0.292601	0.0862275	0.262828	0.402243	0.0998451	1
0.00853303	0.364301	0.801889	0.880376	0.546912	0.200119	0.215902	0.176346	0.332615	0.231416	0.59493	0.855762	1	0.80955	0.747473	0.582465	0.0301236	0		0.469352	0.027735	0.12569	0.224116	0.564406	0.979295	0.957858	0.308057	0.451155	0.160019	0.0878184	0.102719	0.501463	0.0904003	0.148294	0.559296	0.795017	1
0.261385	0.845682	0.918092	0.894404	0.891388	0.691344	0.777935	0.609007	0.447629	0.504521	0.368093	0.793977	1	0.964135	0.861963	0.765051	0.39771	0.0701388		0.408367	0.0985419	0.156726	0.110102	0.651602	0.679351	0.168891	0.0583515	0.156066	0.0605976	0.0642793	0.154419	0.380554	0.275899	0.22505	0.0803219	0.213418	1
0	0	0	0	0	0.261688	0.348917	0.322077	0.082045	0.051733	0.693134	0.870504	1	0.563224	0.236	0.186485	0.0263957	0		0.118889	0.28532	0.429741	0.318278	0.178028	0.0576485	0.126178	0.0850569	0.533588	0.0643627	0.105735	0.216656	0.0796221	0.211841	0.170503	0.294928	0.0548303	1
0.175165	0	0.0569377	0	0	0.458492	0	0	0.120846	0.255126	0.510252	0.552773	1	0.673738	0.62552	0.878823	0.454646	0.52311		0.341964	0.201579	0.563705	0.314144	0.563866	0.582361	0.0719915	0.11419	0.160477	0.288124	0.0771739	0.00800322	0	0.161779	0	0.226801	0.0905218	1
0.6967	0.0537537	0	0	0	0	0	0.0279365	0.046719	0.390964	0.0534438	0.0227273	1	0.41958	0	0	0.198756	0.125964		0.496631	0.768184	0.00548096	0.0461817	0	0	0	0.452447	0.29313	0.35798	0.0435602	0.314093	0.577593	0.179768	0.115681	0.536847	0.486648	1
0.130942	0.576899	0.380889	0.218272	0.366167	0.24985	0.221248	0.11412	0.271565	0.180901	0.219731	0.675782	1	0.52259	0.143257	0	0.012802	0.0740642		0.226199	0.509693	0.22203	0.243202	0.161334	0.145939	0.0465634	0	0.0431488	0.043265	0.0931967	0.00774856	0.182146	0.149579	0.0934451	0.441164	0.440343	1
0.568143	0.330752	0.0688233	0.0656381	0	0	0.307103	0.597259	0.56334	0.490805	0.805884	0.601402	1	0.33303	0.875602	0.504234	0.243618	0.32772		0.42306	0.0498803	0.0678019	0	0	0	0.0652059	0.0643411	0.603619	0.572932	0	0	0.16706	0	0	0.0309296	0.102371	1
0.201142	0.352933	0.35539	0.312758	0.0615774	0.111306	0.0895845	0.150043	0.0545662	0.244992	0.400696	0.803916	1	0.98951	0.609622	0.380586	0.0389118	0.254693		0.969933	0.122029	0.195681	0.0184116	0.23083	0	0.717299	0.0302982	0.362784	0.580725	0.116014	0.0915861	0.0227267	0.0541112	0.0448491	0.871101	0.342339	1
0.130906	0.035874	0.0195497	0.313133	0.00526743	0	0	0.00920588	0.0615823	0.119991	0.0338514	0.554334	1	0.704666	0.481712	0	0.18951	0.053869		0.929889	0.141748	0.0130916	0.0613216	0.0756278	0.272054	0.373446	0.0917302	0.217813	0.437179	0.373894	0.374044	0.18298	0.0433988	0.157519	0.141649	0.482559	1
0.285033	0.527044	0.859037	0.335723	0.0290414	0.0253841	0.0461603	0.0534665	0.0847303	0.296098	0.888196	0.821687	1	0.712597	0.534637	0.364659	0.276326	0.0426935		0.0817941	0.0504668	0.310035	0.0807049	0.00641236	0.107507	0.01926	0.0189431	0.106032	0.0936253	0.262853	0.078243	0.130707	0.0446774	0.108988	0.125478	0.193157	1
0.0147387	0	0.0481966	0	0.0718784	0.221089	0.445634	0.319563	0.433906	0.107139	0.0153348	0.521659	1	0.965833	0.40996	0.188639	0.0307507	0.0493982		0.520576	0.528067	0.471911	0.357475	0.353751	0.16995	0.065801	0.235267	0.380314	0.932779	0.552993	0.893716	0.503251	0.385088	0.490228	0.355254	0.499249	1
0.114399	0	0	0	0	0	0	0.0117447	0.1524	0	0.3375	0.9	1	0.642857	0	0	0	0		0.2343	0.194905	0.131368	0.15945	0.384714	0.302017	0.247105	0.185127	0.692424	0.3733	0.367506	0.407263	0	0.00925914	0	0.0637161	0.189703	1
0.0996082	0.34822	0	0	0	0	0.153976	0	0.0140618	0.147953	0	0	1	0.743304	0.123884	0	0	0.0146539		0.439131	0.193298	0.324289	0.112306	0.046539	0.0925261	0.0389862	0.104021	0.187732	0.0301042	0.00676241	0.0919346	0.119201	0.179764	0.187348	0.193961	0.191607	1
0.145089	0.338411	0.705408	0.221672	0.0377631	0.014797	0	0.0859876	0.058808	0.0845192	0.759062	0.9	1	0.442525	0.474319	0.116188	0	0.0109587		0.322771	0.237633	0.181421	0.246737	0.550213	0.598611	0.244949	0	0.154363	0.507136	0	0.11289	0.0496727	0.0653754	0	0.129595	0.40358	1
0.216497	0.210363	0.458823	0.546452	0.493585	0.169352	0.23285	0.0522743	0.168783	0.158128	0.819121	0.998366	1	0.809562	0.880349	0.375401	0.00592608	0.145517		0.652761	0.33705	0.486274	0.14684	0.135903	0.0401594	0	0.182519	0.166052	0.40662	0.092046	0	0	0.0559898	0.0123787	0.314291	0.313528	1
0.0409817	0	0	0	0.555582	0	0	0	0	0	0	0	1	0	0	0	0	0		0.242936	0.171201	0.0662493	0.282313	0.0173987	0	0.167376	0	0.427068	0.279766	0.0310333	0	0	0.121854	0	0.178551	0.148348	1
0.0154648	0.0330153	0.026854	0.0160585	0.195378	0.590104	0	0.281755	0.229588	0.104865	0.161925	0.540139	1	0	0.113061	0.0621216	0.00864101	0		0.759915	0.22196	0.457593	0.331362	0.286573	0.0425304	0.0772852	0.108103	0.540655	0.149033	0.141118	0.199236	0.416747	0.096174	0.0875948	0.564504	0.586779	1
0.150242	0.138577	0.407043	0.407043	0.500039	0.350134	0.102576	0.0148305	0.124082	0.24988	0.747887	0.83655	1	0.252787	0.494416	0.2656	0.474362	0.157716		0.342134	0.155442	0.133788	0.105095	0.083422	0.117449	0.156033	0.0780328	0.0195711	0.10526	0.255832	0.315252	0.403193	0.27513	0.167906	0.359903	0.196962	1
0.249124	0.643682	0.497811	0.299855	0.331973	0.0806969	0.786109	0.479082	0.732565	0.504553	0.190843	0.523896	1	0.391449	0.426839	0.188649	0.22176	0.163428		0.484665	0.299738	0.450104	0.264123	0.281834	0.469372	0.365515	0.516933	0.30939	0.531531	0.651059	0.249872	0.32187	0.17886	0.240167	0.465317	0.438519	1
0.188499	0	0	0	0	0	0.972222	0.766898	0.158111	0.282139	0.184211	0.518519	1	0.0219878	0.0565035	0	0.0328054	0.094008		0.77118	0.0355642	0.371023	0	0	0	0.0801747	0	0.164844	0.410065	0	0	0	0	0	0.207939	0.263311	1
0.197142	0.0552251	0	0.146354	0.0488296	0.128125	0.879341	0.350568	0.166158	0.414109	0.875161	0.881655	1	0.902163	0.861012	0.778714	0.373143	0.0532639		0.614563	0.178549	0.200229	0.117252	0.0152517	0.105486	0.038394	0.0274462	0.120209	0.0820823	0.085953	0.101951	0.258026	0.333348	0.301054	0.0710824	0.282748	1
0	0	0	0	0	0.748555	0	0	0	0.61291	0.749636	0.571099	1	0.165356	0.711975	0.375579	0.0572042	0.277599		0.0592501	0.49216	0.115504	0.0985415	0	0	0.185137	0	0.504019	0.0770907	0.482022	0.307691	0	0.615581	0	0.0555714	0.0362852	1
0.257636	0.0503762	0.131337	0	0	0.384261	0.0568048	0.133943	0.259674	0.169915	0.713903	0.0706221	0.348419	1	0.10967	0.205699	0.487373	0.0634279		0.671815	0.633204	0.278302	0.0120179	0	0	0	0.0965234	0.490563	0.192742	0	0	0	0.00726972	0.112921	0.0199748	0.223402	1
0.238032	0.0981962	0.199229	0.136232	0.253006	0.280387	0.0127163	0.0770603	0.569156	0.323414	0.691649	0.0998279	0.388388	1	0.376902	0.375319	0.361906	0.0850758		0.26208	0.147292	0.010344	0.035247	0.011421	0	0.0490948	0	0.78476	0.204841	0	0.161205	0.106981	0.691491	0.320942	0.133361	0.00765085	1
0.0750808	0	0	0.677643	0.72977	0	0	0.0711866	0.0091287	0.0363363	0.196379	0.910601	0	1	0.0359364	0	0.0668725	0		0.813129	0.0206386	0.547671	0.16373	0	0.275814	0.444861	0.335503	0.698574	0.334674	0	0	0	0	0	0.405942	0.550364	1
0.532664	0.292007	0	0	0	0	0	0	0.430506	0.508785	0	0.360387	0.132309	1	0.226161	0.0127798	0.418292	0.0268717		0.238013	0.0534659	0.0297746	0.00426161	0.0344153	0	0	0.0103853	0.10146	0.445799	0	0	0	0	0.00169253	0	0.280443	1
0.455431	0.199344	0.0900387	0.614034	0.270617	0	0.205921	0.044126	0.0266778	0.25894	0.592269	0	0.468148	1	0	0.181113	0.0320264	0.95297		0.383673	0.0213526	0	0.0726644	0	0.207597	0.643389	0.540337	0.463433	0.92668	0	0.23988	0.109235	0.0393246	0.0115636	0.509833	0.114758	1
0.285146	0.156027	0.210437	0	0	0	0	0.00946199	0.0315771	0.0109405	0	0	0.769683	1	0.0127993	0.0252972	0.00504962	0.0162794		0.465792	0.288149	0	0	0	0	0	0	0.329108	0.0530473	0	0	0	0	0	0.0445767	0.0187563	1
0.311317	0.560104	0.509807	0.304952	0.320081	0.458295	0.286434	0.100372	0.741087	0.342181	0.663393	0.0745178	0.204806	1	0.141974	0.458679	0.639674	0.308584		0.700526	0.878644	0.18519	0.174223	0.0626727	0.11377	0	0.356667	0.805394	0.110931	0	0	0	0.355621	0.147646	0	0.196844	1
0.393743	0.199292	0.584716	0	0.20942	0.796271	0.243305	0.0204191	0.498895	0.993758	0.878163	0	0	1	0.127578	0	0.0375394	0		0.21088	0	0	0.142627	0	0.0253743	0	0	0	0.0315896	0	0.258641	0	0	0	0.00391257	0.0448051	1
0.245785	0.120144	0.102948	0	0	0	0	0.218138	0.0572162	0.321313	0.101771	0	0.137666	1	0.204997	0.0880022	0	0.209827		0.736495	0.096797	0	0.00463241	0.0732822	0	0.224389	0.235327	0.0870698	0.31568	0.0521587	0.0540762	0.0471938	0.560811	0.0507649	0.367481	0.336855	1
0.931396	0.213557	0.559725	0	0.401422	0.566188	0	0	0.585818	0.752894	0.48812	0	0.520146	1	0.0789885	0.16472	0	0.588346		0.246268	0	0	0	0	0	0	0	0.389487	0.186873	0	0	0	0	0	0.0662614	0	1
0	0	0.0164031	0	0.0400695	0	0.036588	0.121797	0.176931	0.216824	0.0003739	0	0.484365	1	0.0581255	0.0425309	0.0447045	0.0730003		0.377412	0.185957	0.491941	0.0581917	0	0.0405693	0.290014	0.414682	0.261214	0.190031	0	0.913949	0.209902	0.125486	0.0159846	0.194604	0.0431821	1
0.0488162	0.475914	0.583338	0	0	0.248785	0.334501	0.084657	0.0476107	0.0559001	0.228625	0	0.623333	1	0.221833	0	0.138893	0		0.247159	0	0	0.0399913	0	0	0.60266	0	0.91991	0.101727	0.389607	0.626171	0	0	0	0	0	1
0.166392	0.0156452	0.0621783	0.0855091	0.126638	0.212711	0.390213	0.503236	0.131674	0.112534	0.143479	0.0528301	0.364368	1	0.415495	0.602501	0.783791	0.670649		0	0	0	0	0	0	0	0	0.850177	0.252815	0	0	0	0	0	0	0	1
0.148647	0.386458	0.0884412	0.153115	0.0157691	0	0	0.285675	0.221733	0.561615	0.266108	0.117982	0.376672	1	0.17516	0.374689	0.259148	0.268789		0	0	0	0	0	0	0	0	0	0.224903	0.217661	0	0	0	0	0	0	1
0.220521	0.672244	0.86883	0.875568	0.0700589	0.00760076	0.00597328	0.0433493	0.0373838	0.145259	0.147082	0.239493	0.272378	1	0.828966	0	0	0.198775		0.393564	0.0481287	0.763241	0.0525033	0	0	0	0.158694	0.598659	0.025348	0	0.118598	0.474393	0.290663	0	0.119458	0.0486902	1
0.16924	0	0.839453	0.599654	0.684554	0.513041	0.130309	0.382247	0.757824	0.157436	0	0	0.137063	1	0.450795	0.0367258	0.207393	0.186585		0	0	0	0	0	0	0	0	0	0	0	0	0.663007	0.29467	0	0	0	1
0.14433	0.0190117	0.125561	0.222966	0.837545	0.269264	0.161759	0.428855	0.273098	0.388544	0	0.114564	0.780401	1	0.950754	0.397778	0.292118	0.120858		0	0	0	0	0	0	0	0	0.721098	0.0714223	0	0	0	0.478547	0	0	0	1
0.418897	0.65651	0.735105	0.954117	0.779711	0.232049	0.425814	0.583721	0.731841	0.978611	0.353962	0.27667	0.972161	1	0.918436	0.599755	0.2101	0.0815318		0.16654	0.520281	0.00364952	0.0332915	0	0.208522	0.241446	0.167009	0.513015	0.0654092	0.139803	0.144837	0.0526681	0	0.0171221	0.0324744	0.297322	1
0	0	0	0	0	0.156996	0.209328	0.515701	0.295005	0.147027	0	0	0.70534	1	0.322666	0	0	0		0.353024	0.0362532	0	0	0	0	0	0	0.0277012	0	0	0	0	0	0	0.304822	0.708639	1
0	0.0194517	0.4597	0	0	0	0	0.479465	0.251838	0.781081	0	0	0.857143	1	0.909091	0	0	0		0.386467	0.0382384	0.0312546	0.0215806	0.123603	0.185587	0.301662	0.262092	0.103467	0.597973	0.68695	0.261649	0	0.0994753	0.0176496	0.180374	0.288475	1
0.0219767	0.0648911	0.00146848	0	0.0182978	0.219573	0.224087	0.0994139	0.0483428	0	0.288517	0.701576	0.677158	1	0.895132	0	0	0		0.300235	0.0217112	0	0	0.268072	0.0744644	0	0	0	0	0	0	0	0	0.0401128	0	0.121473	1
0.016743	0.0933513	0.246493	0.353498	0.00598471	0.00422225	0.111929	0.124291	0.331633	0.110327	0.654135	0.605728	0.975412	1	0.389529	0.230741	0.370452	0.218936		0.211275	0	0.0313502	0	0	0	0	0	0	0	0	0	0.295822	0.484147	0.449065	0.744809	0.469356	1
0.246147	0.327493	0.160138	0.111782	0.0172657	0.0107208	0.149861	0.497203	0.206522	0.440501	0.106148	0.00376405	0.479451	1	0.522169	0.437612	0.165193	0.296157		0	0	0.274498	0.995055	0.74474	0	0	0	0.10411	0.962235	0.384894	0.424664	0.707773	0.737906	0.21823	0	0.320857	1
0.00672053	0.0371361	0.0433833	0	0	0	0	0	0.144733	0.211217	0	0	0.708788	1	0.0896228	0	0	0		0.950705	0.046413	0	0	0.348021	0	0	0	0	0.184758	0	0	0	0	0.133766	0.0274166	0.384615	1
0.119621	0.256446	0.895562	0	0	0	0.197788	0.503887	0.357686	0.262134	0	0	0	1	0	0	0	0		0.126325	0	0.149161	0.250024	0.178057	0	0	0	0	0.387698	0.552345	0.247166	0.114791	0.152451	0.05772	0.297338	0.499042	1
0.0166613	0.01345	0.0866862	0	0.105443	0.0155312	0.117855	0	0.317359	0.0599548	0.0193393	0.215462	0.781618	1	0.103321	0	0.15461	0		0.304055	0.396813	0.630705	0.317186	0	0.117971	0	0	0.0137964	0.329944	0.14119	0.404646	0.0170391	0.406083	0.313854	0.15065	0.295926	1
0.154797	0.0443683	0.154685	0.368175	0.0490584	0.111659	0	0.213927	0.0282702	0.19774	0.604729	0.974932	0.730467	1	0	0.0106612	0.16121	0.0390307		0.0653827	0	0	0	0	0.0516218	0	0	0.0986331	0.336682	0.65368	0.0930474	0	0	0	0	0.338683	1
0.0496119	0.270421	0.348045	0.649259	0.738675	0.677118	0.677118	0.57239	0.704977	0.495488	0.682212	0.730627	0.838972	1	0.874895	0.735459	0.335396	0.0247237		0.00546494	0.0188213	0.0198445	0.00225934	0.112579	0.041515	0.0138528	0	0	0.255062	0.180906	0.0439796	0.0237223	0.212258	0.226136	0.527337	0.91908	1
0.0649456	0.463664	0.792225	0.845347	0.696891	0.367002	0.396706	0.227572	0.0052669	0.199492	0.648707	0.45483	0.662976	1	0.743714	0.383112	0.321313	0.198746		0.789683	0.26624	0	0.109927	0.0225956	0.257029	0.0108817	0.162349	0.305374	0.119906	0.179495	0.0138471	0	0	0.0120375	0.270688	0.101959	1
0.221243	0.0402735	0.0951198	0.45416	0.578615	0.31768	0.1944	0.537718	0.649168	0.735526	0.875735	0.612086	0.553827	1	0.724821	0.605258	0.199578	0.114364		0.0801025	0	0	0	0.544539	0.678439	0.971638	0	0	0	0	0	0	0.212455	0.077045	0	0.528731	1
0.100583	0.123667	0.0739017	0.381743	0.355453	0.286339	0.411435	0.0790157	0.202263	0.124841	0.0786237	0.18952	0.317393	1	0.246376	0	0.0208907	0.0716631		0.232467	0.528887	0.710007	0.797072	0.077553	0.0971986	0.493544	0	0	0.183722	0.782903	0.782903	0.0150558	0.300331	0.597241	0	0	1
0.169937	0.0687455	0.0196663	0.0116359	0.0431087	0	0	0.00459236	0.116872	0.0298209	0	0	0.503029	1	0.351542	0.385879	0.198371	0.0615599		0.445926	0.028672	0	0	0.0940466	0.150177	0.0585678	0.0934023	0	0.0402098	0.123513	0.149822	0.148637	0.0524719	0.345317	0.231362	0.112213	1
0.212791	0.2852	0	0.197477	0.0878653	0	0	0	0.0252297	0	0	0.0444444	0.888889	1	0.75	0	0	0.013549		0.421547	0.4095	0.404081	0.00362721	0.0413189	0.0226011	0	0	0	0.229037	0.025271	0.302426	0.247629	0.0204016	0	0.0416788	0.332639	1
0	0	0	0	0	0	0	0	0.125836	0.227285	0	0	0.393939	1	0	0	0.0401326	0.175996		0.402243	0	0	0	0	0	0	0	0	0	0	0	0	0.124606	0.0378209	0.211569	0.652841	1
0.149718	0	0.38815	0.676739	0.459483	0.0492303	0.252958	0.705341	0.334525	0.117953	0.26782	0.155093	0.398724	1	0.434167	0.28434	0.658238	0.0721489		0.322523	0.301621	0.213221	0.220097	0.0216427	0.087867	0.319684	0.0659998	0.212174	0.75052	0.717225	0.657704	0.373385	0.227382	0.165526	0.33991	0.805154	1
0.0159445	0	0	0	0.399304	0	0.00118763	0.443039	0.0380969	0.0705247	0	0	0	1	0	0.610945	0.0017256	0.0123942		0.940527	0.15957	0.57715	0.530568	0.103263	0.262265	0.0404936	0.251725	0.501988	0.195757	0	0	0	0	0	0.149701	0.137887	1
0.0500822	0.30633	0.15179	0	0	0	0	0	0	0	0	0	0	1	0.391003	0.547404	0	0.0431276		0	0	0	0	0.390643	0	0	0	0	0	0	0	0	0	0	0.312371	0.901755	1
0.3346	0.198482	0.243149	0.0248545	0	0	0.0491679	0.400119	0.573162	0.506942	0.201757	0.164688	0.507798	1	0.57247	0.317365	0.128002	0.151481		0.00647464	0	0	0	0	0.247736	0	0	0	0	0	0	0	0	0.549621	0.302836	0.27398	1
0.278599	0.00702327	0	0	0	0	0.0225122	0.399649	0.217377	0.209328	0.320435	0.23532	0.0594508	0.396547	1	0.111773	0.154738	0.194084		0	0.0920328	0.402389	0	0	0	0	0	0.241638	0.291164	0.243589	0	0	0	0.427382	0.489489	0.482131	1
0.0502102	0.069658	0.424461	0.518032	0.594794	0.422637	0.22475	0.0462643	0.0453083	0.431068	0.304511	0.524591	0.369508	0.608231	1	0.429652	0.204922	0.0927804		0.417041	0.0677733	0.232572	0.00423049	0.0235984	0.307588	0.32797	0.531814	0.410361	0.397736	0.046396	0.334649	0.16736	0.655843	0.846799	0.0202547	0.492299	1
0.49283	0.157096	0	0.0584464	0.515228	0	0.0560352	0.0156355	0.0204552	0	0	0	0.0768231	0.596615	1	0.639208	0	0.325644		0.210922	0.673085	0.162549	0	0.663075	0	0.113673	0.144578	0.635152	0.625669	0.709122	0	0	0.447197	0	0.89384	0.450767	1
0.187752	0.311085	0.6051	0.16705	0.772898	0.162911	0	0.301324	0.485966	0.686781	0.0330112	0.117897	0.0606443	0.398722	1	0.369507	0.271906	0.65031		0.100433	0.0743754	0.0987998	0.225961	0.316345	0	0.00440848	0.133667	0.698199	0.576081	0.372902	0.226221	0	0	0.168353	0.201113	0.194623	1
0.101698	0.263286	0	0.342493	0.553257	0.182369	0.755207	0.618311	0.339958	0.202053	0.220474	0.394966	0.484675	0.997051	1	0.114163	0.11326	0.030572		0	0	0.158721	0.347851	0	0.0894224	0.553106	0.210234	0.33234	0.623027	0.0566537	0	0	0.523778	0.236947	0	0.197705	1
0	0	0	0.0680776	0.357408	0	0	0.0170067	0	0	0	0	0.464955	0.813671	1	0.188463	0.0847423	0		0.258119	0.0363489	0	0.133908	0.583817	0.117936	0.209355	0.254939	0.183477	0.234392	0.217959	0.0991913	0.189858	0.0949292	0.109575	0.43897	0.0828833	1
0.168508	0.396913	0.149356	0.1359	0.233852	0.494369	0	0.542054	0.143039	0.729297	0	0	0	0.100223	1	0.367149	0	0.157973		0.0551057	0	0.00745049	0.00602528	0	0	0	0	0	0	0	0	0	0	0	0	0.305209	1
0.216543	0.373701	0.0452988	0.155767	0.389229	0.260553	0.162044	0.404481	0.281255	0.263386	0.154352	0.502649	0	0.11201	1	0.171297	0.331858	0.122273		0.382496	0.863885	0.420535	0.151849	0	0	0.0894317	0	0.128573	0.588634	0.747383	0.471822	0.329655	0.136326	0	0.308607	0.422277	1
0.121004	0.0610746	0	0	0	0	0	0.0264088	0.186634	0.855739	0.977558	0	0.540271	0.744149	1	0.176378	0.175836	0.198764		0.0497054	0.0156827	0.00714172	0.00311693	0.0362205	0	0.130239	0.192841	0.58245	0.207856	0.0324309	0.0209218	0	0.175334	0.38227	0	0.175056	1
0.101751	0.0647628	0.364445	0.427106	0.425695	0.221653	0.327808	0.061464	0.101582	0.11428	0.178011	0.138012	0.229953	0.778253	1	0.298786	0.207739	0		0.379782	0.0406861	0	0	0.0763012	0.0286704	0.270428	0.00361304	0.136346	0.0912825	0.198013	0	0	0	0.0730619	0.29479	0.786409	1
0.263798	0.378623	0.725303	0.365366	0	0.135907	0.0301038	0.180272	0.226071	0.24576	0	0	0.167217	0.340205	1	0.142789	0.222002	0.305738		0.298483	0	0.565785	0.655514	0.0325767	0	0.21348	0	0.00412541	0.71556	0	0	0	0	0	0.221524	0.774995	1
0.220794	0.57708	0.314857	0.0372642	0.49697	0.415512	0.0811068	0.136197	0.191714	0.416943	0.0747714	0.140994	0.0224309	0.191872	1	0.231056	0.0603619	0.148441		0	0	0	0	0	0	0	0	0	0	0	0	0	0	0	0	0	1
0.0341518	0.171849	0.0144671	0.143465	0.256171	0	0.242193	0.55466	0.18763	0.0722879	0	0	0	0.0439876	1	0.802087	0.0369126	0.112026		0.17373	0.0920414	0.144855	0	0.0776546	0.0292345	0.0606933	0.394741	0.146221	0.655415	0.446461	0.47275	0.314055	0	0	0.100768	0	1
0.36266	0.240987	0.184475	0	0	0	0	0	0.0564707	0.875095	0.0573395	0	0	0	1	0.380824	0.486354	0.483283		0.823937	0.957359	0.564884	0	0	0	0.0214185	0.203632	0.957411	0.368739	0.128449	0.0784583	0	0.120011	0.228081	0.183162	0.374576	1
0.153033	0.556879	0.480979	0	0	0	0.107264	0	0.519434	0.387083	0.292488	0.0544624	0	0.578473	1	0.0932	0	0.011207		0.55656	0.0426466	0.471123	0.0586239	0.0976482	0	0	0	0.0837267	0.256113	0.188998	0.163065	0	0.318452	0.139649	0.191665	0.208621	1
0.63753	0.478944	0.479154	0.674237	0.310741	0.213116	0.15281	0.0441365	0.103279	0.232003	0.0714044	0.231759	0.584268	0.696534	1	0.217188	0.246881	0.390071
0.215496	0.177294	0.425288	0.544618	0.386317	0.195062	0.0905794	0.287676	0.207648	0.133038	0.404176	0.834805	0.693972	0.45151	1	0.72056	0.211933	0.136363
0.142356	0.646223	0.0365859	0.287478	0.261945	0.936735	0.580689	0	0.507468	0.929856	0.388268	0.317273	0	0	1	0.293638	0.822613	0.682018
0.0681004	0.24151	0.0827902	0.224396	0.237212	0.0473924	0	0.0795755	0.179184	0.157815	0	0.828315	0.424333	0	1	0.420675	0.967556	0.398186
0.394195	0.0367089	0.316996	0.585903	0.0269131	0	0	0.227911	0.973051	0.255117	0	0	0	0.0369808	1	0	0.167751	0.0157458
0.21804	0.32359	0.290218	0.273232	0.289979	0.141125	0.278429	0.496605	0.315959	0.293875	0.432438	0.671017	0.769241	0.496937	1	0.601988	0.187257	0.147437
0.326834	0.474247	0.548974	0.409308	0.443376	0.292183	0.117572	0.112807	0.0812052	0.526324	0.102706	0.109385	0.320949	0.557123	1	0.55553	0.312347	0.121385
0.0325234	0.125481	0.268327	0.288041	0.235069	0.0877245	0.0429693	0.249454	0.392787	0.297881	0.506816	0.494434	0.572092	0.963081	1	0.791269	0.301096	0.210285
0	0	0.0224008	0	0	0	0	0.0854414	0.208896	0.372068	0.442995	0.718869	0.0391131	0.490009	1	0.518632	0.158392	0.361891
0.0172748	0.212966	0.54809	0.562791	0.450776	0.061447	0	0.0683339	0.297085	0.201329	0.0240308	0.133365	0.0201041	0.0410527	1	0.993978	0.00420708	0.00935061
0	0.0437265	0.901316	0.450311	0	0	0	0.338293	0.543846	0.118375	0.728925	0.0938008	0.135754	0.975113	1	0.349394	0.305571	0.100426
0	0.0264092	0.0608899	0	0	0	0	0.146945	0.0599481	0.861986	0	0	0	0	1	0	0.155384	0.588593
0	0	0	0	0	0.0161579	0.488583	0	0	0.616889	0.918745	0	0	0	1	0	0	0
0.264583	0.228367	0.282545	0.313689	0.356224	0.237483	0	0	0.0953732	0.0950205	0.077864	0.447789	0.435661	0.395324	1	0.727929	0.210887	0.408609
0.674331	0.251198	0.183857	0.234229	0.195491	0.0208686	0	0.307261	0.50626	0.299613	0	0.420529	0.042648	0.155858	1	0.593016	0.954694	0.464113
0.205276	0	0.0966977	0.332937	0	0	0	0	0.120164	0	0	0	0	0.15989	1	0	0	0.0781121
0	0	0	0	0	0	0	0.278043	0.671846	0.698062	0.0473069	0.304978	0.68403	0.68403	1	0.791108	0.0739515	0.580932
0	0.0486709	0	0.114233	0.00498808	0	0	0.135963	0.6676	0.306098	0.203395	0.736764	0.685936	0.602991	1	0.638062	0.179067	0.0522933
0	0.141491	0	0	0	0	0	0.320605	0.457471	0.274882	0.442306	0	0	0.547466	1	0.567731	0.3278	0
0	0.0242888	0.0562243	0.207224	0.199359	0.446318	0.167505	0	0	0.101706	0	0	0	0.245054	1	0	0	0.438181
0	0	0	0	0	0	0	0	0	0	0	0	0	0.301961	1	0	0	0
0	0	0	0.540107	0.694423	0	0	0	0	0	0	0	0	0	1	0	0	0
0.13181	0.0311267	0.00315116	0.0444504	0	0	0	0.330501	0.359465	0.483519	0.436653	0.3607	0.558303	0.854778	1	0	0.503515	0.0786506
0.0722717	0.578575	0	0	0	0	0	0	0.202957	0.115371	0.663619	0.921425	0.71892	0.784276	1	0.730301	0.175814	0.270633
0.421948	0	0	0	0	0	0.629455	0.715121	0.0972292	0.179815	0	0	0	0	1	0.0947547	0	0.0729803
0.0468259	0.233906	0.372646	0.453473	0.821186	0.657015	0.606518	0.843007	0.856112	0.150137	0.0113415	0.369427	0.57011	0.589686	1	0.615671	0.262628	0
0.19275	0.136846	0.490562	0.468264	0.468264	0.429242	0.429242	0.250532	0.458404	0.428253	0.120422	0.0287109	0.3515	0.770516	1	0.0897137	0.108771	0.0981927
0.109867	0	0	0	0	0	0	0.188575	0.819975	0	0.0622035	0.516923	0	0.522846	1	0.407158	0.260691	0.153723
0.0426153	0.159048	0.376146	0.355548	0.331685	0.42881	0.446936	0.282091	0.380396	0.430793	0.511887	0.555424	0.605405	0.66646	1	0.941945	0.752165	0.386305
0.162799	0	0	0	0	0	0	0.364173	0.856037	0.0613659	0.0989877	0.229886	0	0.146574	1	0.327284	0	0.527865
0.341856	0.206927	0.0347517	0.0750341	0.13014	0	0.153835	0.189461	0.111751	0.134317	0	0	0	0.0769231	1	0.730621	0.0358253	0.129717
0.523284	0.156552	0.571106	0.415167	0.219602	0.185571	0.226769	0.253049	0.0969962	0.0851488	0.622288	0.493239	0.493245	0.751205	1	0.425647	0.288716	0.00784859
0.0371555	0	0	0.231377	0.252411	0.0751924	0.137607	0.270624	0.313099	0.148914	0.597646	0.747058	0.276688	0.230769	1	0.285714	0.0722023	0.327663
0	0.250893	0.140669	0.117622	0.258196	0	0.373076	0.25712	0.0668264	0.0560045	0	0	0	0.307692	1	0.497814	0.0443708	0.0470084
0.724761	0.195846	0.289468	0.645191	0.645191	0.841746	0.714069	0.575192	0.273937	0.42279	0.561738	0.55374	0.511793	0.576016	1	0.379604	0.615922	0.943456
0.0256137	0	0.040421	0.0487416	0.0553521	0	0	0.0213561	0.0673687	0.109926	0.184232	0	0.631619	0.852686	1	0.427372	0.221637	0.0750038
0.0133802	0.204125	0	0	0	0	0.114664	0.0362096	0.167111	0.00679273	0	0.0456117	0.216252	0.567847	1	0.792609	0.114763	0.0198381
0.0270035	0.0193382	0	0.1866	0.562358	0.483431	0.41319	0.508665	0.158825	0.0830977	0.315351	0.698965	0.459272	0.386355	1	0.833696	0.292353	0.143327
0.0378984	0	0	0	0	0.16477	0	0.368127	0.0252636	0.0262178	0	0	0.0796744	0.885647	1	0.654003	0.0735983	0
0.156853	0.214678	0	0	0	0	0	0	0.583212	0.0270376	0.654392	0	0	0	1	0.790452	0.210811	0.136793
0.0885477	0.218425	0.533142	0.790275	0.743569	0.576711	0.532889	0.250769	0.352224	0.508356	0.0552239	0	0.0574362	0.659626	1	0.914798	0.509234	0.735498
0.0935541	0.317591	0	0.0866165	0.141401	0.859867	0	0.297387	0.991111	0.948539	0.160293	0.112591	0.214464	0.111144	0.55138	1	0.093897	0.163446
0.134362	0.927918	0	0	0	0	0.0555865	0.530947	0.21554	0.330236	0.685253	0.943004	0.282559	0.0241377	0.387441	1	0.158302	0.0485123
0.190901	0.21486	0	0	0	0	0	0	0	0.0381069	0	0.430641	0	0.7875	0	1	0.111318	0
0.11834	0.261388	0.353744	0.21622	0.209877	0.501639	0.845477	0.510462	0.42962	0.275733	0	0	0.489083	0.998221	0.981716	1	0.0238483	0.11541
0.624801	0.604752	0.0674605	0	0.0274123	0.932494	0.273447	0	0.064614	0.626582	0	0	0.227493	0.419693	0.180482	1	0.325463	0.237554
0.193373	0.295356	0.255379	0	0	0	0.0298816	0.0125068	0.0521481	0.036758	0	0	0	0.0630798	0.128137	1	0.952626	0.368117
0.31709	0.693285	0.501787	0.118231	0.304606	0.231885	0.539977	0.171573	0.128544	0.105784	0.238416	0.333782	0.0559561	0.0740844	0.262164	1	0.986223	0.776337
0.23825	0.474647	0	0	0	0	0.03618	0.0330066	0.982456	0.604421	0.377582	0.791346	0.747797	0	0.593652	1	0.321223	0.378472
0.0177344	0.642512	0.10667	0	0.149397	0	0.0243273	0.828334	0.158942	0.00631096	0	0.0418781	0	0	0.979448	1	0.325537	0.114664
0.433947	0.147918	0.0973947	0	0	0.299701	0.0905492	0.0377969	0.0105478	0.170206	0.431878	0.116318	0	0.0519064	0.36607	1	0.551066	0.298672
0.12567	0.171965	0.394306	0.326772	0	0.200257	0.572529	0.75158	0.949538	0.557567	0.0237426	0.0752106	0.184268	0.0622572	0.37965	1	0.672669	0.382754
0.317844	0.845444	0.0876757	0.599612	0	0	0.309039	0.219924	0.190205	0.147551	0.483033	0.0161381	0.402088	0.304614	0.329707	1	0	0
0	0.0268013	0.198433	0.113042	0.243454	0	0	0	0.0796786	0	0.00916409	0	0	0	0.121004	1	0	0
0.659677	0.788845	0	0	0.310848	0.172693	0.208871	0.171218	0	0.470708	0.319477	0.0185064	0.0208481	0.287066	0.900616	1	0.22369	0
0.0808306	0.238251	0.768617	0.37479	0.130215	0.69937	0.533957	0.964906	0.281709	0.565194	0.78614	0.673488	0.784433	0.517398	0.54712	1	0.62517	0.6964
0.145263	0.531847	0.233706	0.350727	0.126629	0.197417	0.369815	0.019643	0.759049	0.219765	0.37721	0.363026	0.186475	0.122493	0.273285	1	0.807116	0.237965
0.0301143	0.200302	0.175212	0.0152448	0.0889945	0.112959	0.340053	0.370763	0.172469	0.147872	0.189403	0.138116	0.153534	0.457184	0.625733	1	0.689394	0.260806
0.337169	0.962082	0.674211	0.17369	0.303582	0.258705	0.261001	0.500504	0.414224	0.424525	0.491491	0.484565	0.499511	0.456179	0.900682	1	0.256994	0.23907
0.0666585	0	0	0	0	0.0167054	0.332069	0	0	0	0	0	0	0	0	1	1	0.157895
0.0427663	0	0.109748	0.22118	0.311182	0	0.020319	0.135471	0.286427	0.0593568	0.255855	0.0614343	0.0784001	0.196	0.307307	1	0.681343	0.141109
0.0359334	0	0.164291	0	0	0	0.734721	0.235256	0	0.626229	0.531926	0.411043	0	0.313422	0.152865	1	0.679476	0.0405613
0.51701	0.25377	0.193554	0.08119	0.090651	0.118412	0.235905	0.379554	0.117904	0.0799553	0	0.357643	0.0305049	0.287677	0.967273	1	0.0108508	0.062018
0.0930354	0.152407	0.53876	0.274915	0.0558758	0.116364	0.0984393	0.128955	0.0735206	0.537639	0	0.343083	0.425063	0.345061	0.703024	1	0.184476	0.114976
0.165022	0.244386	0.123254	0.253219	0.501396	0.253381	0.0166927	0.383294	0.237111	0.187379	0.378255	0.718681	0.503257	0.522748	0.964328	1	0.475735	0.217285
0.00125433	0.051389	0.155045	0.110323	0.0435763	0.0916613	0.0405791	0.176063	0.232362	0.0484321	0.0925742	0.169397	0.541649	0.758077	0.636101	1	0.924152	0.246489
0.0440342	0	0.0224262	0	0	0	0	0	0.775832	0.163423	0.260909	0.0652272	0.410668	0.443822	0.543013	1	0.390869	0.27822
0.267249	0.138111	0.348387	0.314945	0.0308324	0.0242886	0.0345437	0.149128	0.797699	0.405135	0.134527	0.214705	0.00906186	0.0704478	0.223237	1	0.752522	0.0768902
0.0329936	0	0	0	0	0	0	0	0.0719771	0.177294	0	0.321691	0.0663728	0.344411	0.340251	1	0.192901	0.24289
0	0	0	0	0	0	0	0.0253388	0.107395	0.0376524	0	0.812809	0	0	0	1	0	0.17535
0.290818	0	0	0	0	0	0	0.0833521	0	0.0293608	0.395694	0	0	0.24311	0.0520951	1	0.729983	0
0.595571	0.0712434	0.0830592	0	0.393964	0	0	0	0.0398048	0.0789884	0.373135	0.0729597	0	0	0.251082	1	0	0.43601
0.101626	0.00607173	0	0	0	0.0462493	0	0.0158697	0.125244	0.0909349	0.0518061	0.172334	0.335098	0.430844	0.347567	1	0.905574	0.828403
0.757296	0	0	0	0	0	0	0	0.135352	0	0.0365721	0.201621	0	0	0	1	0.403806	0.995623
0.556507	0.303089	0.486128	0	0	0	0	0	0.0927614	0	0.224342	0.400361	0	0	0.30303	1	0.474801	0.0238639
0.257645	0.0215425	0.0320573	0	0	0	0	0	0.0488427	0	0	0.0870985	0.0594149	0.149129	0.337633	1	0.242629	0.661404
0.715397	0.315257	0.0895491	0.429006	0.0340317	0.185361	0.227231	0.123374	0.274007	0.78224	0.252409	0.546801	0.840308	0.661094	0.573539	1	0.772384	0.851975
0.168114	0.346107	0.0592967	0.0999429	0.146254	0.0124071	0	0.164035	0.0532979	0.15313	0.099144	0.106438	0	0	0.0777001	1	0.0348986	0.273609
0.22571	0	0.372052	0.0981005	0.0723925	0.100726	0.115806	0.112819	0.017111	0.0255766	0.178061	0.0481765	0	0	0.464189	1	0.456503	0.534849
0.59133	0.241209	0.596482	0.225212	0.10059	0.0230518	0	0.0480259	0.365362	0.372311	0.112434	0.242733	0.0623925	0.0687317	0.0774132	1	0.734228	0.0972731
0.0264248	0.0202475	0.148292	0.26884	0.0756112	0	0	0.0630637	0.711274	0.272325	0	0.455072	0.530917	0.628138	0.704718	1	0.553265	0.194396
0.0574152	0.144649	0.0646116	0	0	0	0	0.0631333	0.15826	0.139781	0.240766	0.107054	0.429603	0.392485	0.222911	1	0.53374	0.125429
0.194794	0.207891	0.262493	0.461383	0.418187	0.138723	0.0596191	0.148668	0.218268	0.215123	0.43853	0.552707	0.183242	0	0.289654	1	0.943219	0.167881
0.0455516	0.0802032	0.298024	0.107608	0.175975	0.177461	0.314479	0.199107	0.044687	0.035298	0.0238212	0.0606299	0.0567404	0.471708	0.566049	1	0.580155	0.361125
0.0364093	0.60465	0.534099	0.445139	0	0	0.143946	0.136475	0.172445	0.187644	0	0	0	0	0.272727	1	0.051435	0.599242
0	0.0359025	0.111379	0.184615	0.0510489	0	0	0	0	0	0	0	0	0	0	1	0.0216749	0.079106
0.0749118	0.144579	0.117144	0.0489627	0	0.153146	0.00183138	0.0748535	0.282152	0.220208	0.22844	0.183663	0.368868	0.347607	0.244397	1	0.592168	0.189937
0.0359168	0.0588616	0	0.210295	0.17952	0.0380051	0.00311241	0.0767672	0.0269582	0.0953442	0	0	0	0	0	1	0.973847	0.14624
0.181303	0.252418	0.300045	0.0270327	0.0234927	0	0.0126265	0.137617	0.134168	0.135227	0.104607	0.0255795	0.168398	0.320604	0	1	0.255206	0.337639
0.73787	0.862426	0	0.449061	0.53271	0.53271	0.201246	0	0.719374	0.838637	0.655571	0.691992	0.508402	0.0416305	0.199486	1	0.609438	0.418398
0.848862	0.479024	0	0	0	0	0.888156	0.267013	0.0889904	0.0370367	0	0	0.5832	0.760274	0.397009	1	0.526282	0.016986
0.420114	0.814776	0.518303	0.636725	0.190074	0.149924	0.460833	0.572827	0.288727	0.627615	0.0432923	0.383301	0.415514	0.110894	0.208139	0.356838	1	0.19306
0.338197	0.0299193	0.0810781	0	0	0.202282	0	0.0401515	0.254188	0.289594	0.062087	0.501435	0.33308	0.436417	0.119407	0.411306	1	0.320736
0	0.0304688	0.0182429	0	0	0	0	0.16308	0.258478	0.097779	0.186291	0	0.0241414	0.102717	0.166177	0.252006	1	0.725423
0.0935342	0.238346	0.13261	0	0	0	0	0.0412658	0.0302353	0.0218212	0	0	0	0	0.00261067	0.0370972	1	0.965152
0.206596	0.0310351	0	0	0	0	0.0405823	0.00377456	0.00409684	0.0130164	0	0	0	0.0578389	0	0.0975391	1	0.645519
0.257341	0.1293	0.530991	0.115768	0	0.409843	0.52564	0	0.0603608	0.311135	0.511408	0.328896	0.362773	0.631285	0.844046	0.727446	1	0.943388
0.308802	0.0652347	0.00614629	0.435449	0.422504	0.422504	0.39765	0.160203	0.162981	0	0.00218521	0.326664	0.641787	0.77681	0.520631	0.443994	1	0.562749
0.337702	0.040561	0.00758808	0	0	0	0.119313	0.118479	0.0673791	0.0168553	0.00743489	0	0.0132205	0	0.0078093	0.0994926	1	0.33265
0	0	0.328657	0.0116142	0	0.167175	0.432519	0.410614	0.523598	0.385124	0	0.0836653	0.425482	0.663205	0.0782272	0.031974	1	0.321902
0	0.0258024	0	0.177864	0.0327319	0.108925	0.307552	0.225918	0.209128	0.709481	0.473807	0.0862328	0.331195	0	0.194868	0.193641	1	0.119071
0.155551	0.0808195	0.562143	0.0980662	0.0412051	0.379927	0.372962	0.116554	0.180548	0.27414	0.197807	0.0100491	0.216953	0.402416	0.511282	0.77371	1	0.929797
0.879942	0.328939	0.289329	0.529263	0.150111	0.396254	0.553812	0.784684	0.661916	0.986404	0.763746	0.976851	0.763803	0.562837	0.00883897	0.240318	1	0.957354
0	0	0	0	0	0	0	0	0	0.0665235	0	0.0379067	0	0	0	0	1	0.687089
0.755528	0.745153	0.834099	0.627095	0.007207	0.210526	0.622716	0.602177	0.214568	0.304087	0.216929	0.212466	0.508561	0.424627	0.269004	0.148491	1	0.537485
0.296681	0.133895	0.0771983	0	0.678925	0.783277	0.0763791	0.335582	0.0819686	0.28132	0.624643	0.0462228	0	0.272548	0.550818	0.625108	1	0.352752
0.027366	0	0.100855	0.740717	0.517847	0.793817	0.746614	0.292768	0.103483	0.5372	0.442952	0.241253	0.419648	0.772344	0.450507	0.819792	1	0.442797
0.194717	0.308517	0.48638	0.431302	0.226225	0.229127	0.106616	0.102565	0.260971	0.0819189	0.0890045	0.100838	0.0516946	0	0.0565847	0.339371	1	0.684294
0.173735	0	0.0256001	0	0	0.0624324	0	0	0	0	0	0	0	0	0	0	1	0.203765
0.0384254	0.115135	0	0.10607	0.0587152	0	0	0	0.135664	0.0499259	0	0	0	0.442689	0.0133225	0	1	0.804324
0.380143	0	0	0.205953	0	0	0	0	0.484557	0	0	0	0	0	0	0	1	0
0.350961	0.385649	0.0813481	0	0	0	0	0	0.00371379	0.0319799	0.0162514	0.0264085	0.00289127	0.140501	0.154552	0.148938	1	0.457706
0.0676113	0.270969	0.476943	0.454744	0.237724	0.415809	0.371339	0.359375	0.298995	0.489192	0.532856	0.185352	0.262391	0.501433	0.692461	0.782756	1	0.205533
0.163873	0.0139376	0.109865	0.154853	0.0722219	0.0888996	0.0915223	0.0718498	0.14781	0.262221	0.262316	0.234386	0.069976	0.253931	0.238972	0.836156	1	0.422675
0.178748	0	0.0389421	0.11945	0.079543	0.186569	0.226916	0.280289	0.495142	0.233422	0.0070768	0.0975893	0.121987	0.0332691	0	0.359303	1	0.738188
0.843755	0.196363	0.193326	0	0	0	0	0.102698	0.00507996	0.234139	0.549562	0.0357633	0	0.0138699	0.0612586	0.289661	1	0.598046
0.0552317	0.107939	0.175162	0.222933	0.222933	0.0408711	0	0.0490476	0.0971345	0.0705305	0	0	0.0202973	0.0774988	0.029062	0.0810029	1	0.0730999
0.361368	0.0398131	0.0175623	0	0	0.46797	0.0605396	0	0.0956059	0.0920981	0.126887	0.102829	0	0	0	0.217944	1	0.633082
0.538089	0.308143	0	0	0	0	0	0	0	0.221978	0.44277	0.244689	0.110458	0.370749	0.440518	0.520708	1	0.210857
0.186099	0.116673	0	0	0	0	0	0	0.921756	0.861495	0.23379	0.168849	0	0	0.333158	0.829104	1	0.260557
0.166384	0.282763	0.0531742	0	0.00302484	0.0938782	0.0730164	0.125255	0.385715	0.908758	0.103272	0.0457031	0.0514178	0	0.215909	0.95	1	0.534072
0.169214	0.31677	0.0379384	0	0.422896	0.222094	0.315867	0.25331	0.337339	0.258412	0.177877	0.198675	0	0.234257	0.926271	0.851929	1	0.193602
0.139739	0	0	0	0	0	0	0	0.0980458	0.0941617	0.00520464	0.0348788	0.00933309	0.0448143	0.18648	0.52456	1	0.0159846
0.0824944	0.0717625	0.00190025	0.0210489	0.223555	0.38982	0.468019	0.5623	0.855005	0.150041	0.0118793	0.300245	0.467383	0.640545	0.863636	0.95	1	0.221227
0.288577	0	0.0894051	0	0.126333	0	0.268801	0.372186	0.240243	0.174195	0.343031	0.304638	0	0	0	0	1	0.807444
0.163465	0.0161929	0.0690235	0.166954	0.0456151	0	0	0.0347993	0.1432	0.177336	0.584552	0.306851	0.114442	0.0686506	0.0462079	0.156454	1	0.102696
0	0	0	0	0	0	0	0	0.0305188	0.0798655	0.0248799	0	0	0.165124	0.228171	0.0693825	1	0.00734716
0.0222544	0	0.133303	0.0566332	0.0411207	0.0875987	0.00999825	0.302955	0.294262	0.655255	0.324357	0.040819	0	0	0.161872	0.511918	1	0.338723
0.341196	0.252907	0.358045	0.299758	0.5173	0.652032	0.549701	0.443676	0.421299	0.617776	0.571211	0.0808836	0.143879	0.210116	0.328773	0.237589	1	0.299088
0.812699	0.126072	0	0	0	0	0	0.0420733	0.71816	0.369733	0.00495389	0.0322697	0.290676	0	0	0.825694	1	0.784839
0.183799	0.459711	0.280332	0.233371	0	0	0.162741	0.176853	0.0668658	0.341457	0.547588	0.3128	0.0689387	0.200171	0.40468	0.741096	1	0.140785
0.659519	0.0544663	0.0342485	0.0695559	0	0	0	0	0.274856	0.391241	0.228012	0.188682	0.0419309	0.084375	0	0.395687	1	0.143449
0.55257	0.386897	0.0654654	0	0	0	0	0.0513388	0.0108536	0.0214059	0.0135915	0.0153615	0.037474	0.334926	0.158828	0.318942	1	0.0946278
0.113031	0.0332065	0	0.0362944	0.272941	0.0870331	0	0	0.0566579	0	0	0.0303696	0.0442261	0.0615941	0	0.864229	1	0.607342
0.108046	0	0	0.17813	0	0	0	0.0178279	0.22043	0.110394	0.0499994	0.258286	0	0	0.256703	0.31686	1	0.265575
0.845894	0	0.734712	0.0852759	0.204868	0.232369	0	0.0273814	0.0669506	0.0530802	0.316051	0.505682	0	0	0	0	1	0.721819
0.407694	0.193335	0.0225315	0.13229	0.0917198	0.00647248	0.0157203	0.0843442	0.0831091	0.093985	0.0689901	0.94236	0.360659	0.358533	0.161417	0.399351	1	0.486717
0.0554014	0	0	0	0.527916	0.859855	0	0	0.00844932	0.126658	0.671827	0	0	0	0	0.277441	1	0.0666403
0.247941	0	0.103295	0	0	0	0.0166873	0	0.0430738	0.0511908	0.0624339	0.983334	0	0	0	0	1	0.173073
0.100348	0.108571	0.175794	0	0.420613	0	0.0262605	0.00513624	0.240081	0.653143	0.288237	0.854497	0	0	0.121832	0.0973511	1	0.162127
0.0739821	0.291779	0.057265	0	0.438464	0.200441	0.0289783	0.0153764	0.083528	0.248366	0.529001	0	0	0	0	0	1	0.308476
0.876994	0	0.146666	0	0.263446	0.592029	0.032263	0.0695524	0.558177	0.340448	0	0	0	0	0	0	1	0.0697614
0.0779119	0.10722	0.334402	0.349122	0.15749	0.883494	0.966584	0.453992	0.144198	0.988494	0.663461	0.569987	0.624277	0.554972	0.330484	0.0997794	1	0.438547
0.555157	0	0	0	0	0.268342	0.0655671	0	0.245899	0.552301	0.772296	0.0991059	0	0.221653	0.321386	0.638154	1	0.329022
0.327792	0.118649	0	0	0.299573	0	0.727076	0	0.220034	0.0171304	0.432174	0.79725	0.999055	0.0417452	0.211007	0.115094	1	0.785718
0.379091	0.166511	0	0.296558	0.227924	0	0	0.092118	0.597912	0.138776	0.268739	0.185548	0.759749	0.142878	0.437402	0.0548283	1	0.667249
0.475748	0	0	0	0	0.56649	0.0045555	0	0	0.164155	0.650014	0.32442	0	0	0.532081	0.811042	1	0.28125
0.0136748	0.240745	0.108959	0	0	0	0.057391	0.439001	0.0693297	0.578825	0.0256106	0.328021	0.0702669	0	0.0635539	0.848288	1	0.446379
0.22134	0.058461	0	0	0	0	0.139787	0	0.124086	0.0977484	0.100252	0.0263889	0.0826735	0.0649509	0.0748801	0.314566	1	0.375254
0.335064	0.141779	0.503859	0.0643979	0.0682282	0	0.207506	0.00899463	0.182017	0.133063	0.269962	0.38566	0.134155	0.15198	0.292706	0.900474	0.656189	1
0.354321	0.825959	0.115538	0.392812	0	0	0.409993	0.0574842	0.489572	0.263834	0.225578	0	0	0	0.0144166	0.0319766	0.174868	1
0.976773	0.95044	0.341703	0.250898	0.798569	0.603571	0.250499	0.556067	0.400917	0.32485	0.165711	0.218654	0.074341	0.434665	0.690845	0.445963	0.718875	1
0.656874	0.155723	0	0	0	0	0	0	0.607427	0	0	0	0	0	0	0	0	1
0	0	0	0	0	0	0	0	0.139437	0	0	0	0	0.02442	0	0	0	1
0.357528	0.103216	0.0546109	0	0	0	0.0210412	0.0172756	0.0797889	0.0770416	0	0	0	0.138218	0.243909	0.0477263	0.0457833	1
0.571177	0.0735274	0.253577	0	0	0	0	0	0.0042222	0.0295785	0	0	0	0.173421	0.0662982	0.115359	0.687232	1
0.0710133	0.273963	0.34638	0	0.14123	0	0.0652455	0.119095	0.249958	0.131151	0.157069	0	0	0.0142062	0	0.131128	0.930304	1
0.376895	0.0743138	0.560706	0.0258284	0	0	0.0277303	0.152183	0.253432	0.209885	0.0986907	0.0461232	0.0713595	0.172962	0.130747	0	0.349768	1
0.0843402	0.0703318	0.289042	0.0429327	0.089139	0	0.0717112	0.950664	0.764332	0.0167969	0.414651	0	0	0.00424809	0.110158	0.204701	0.00712537	1
0.395602	0.623538	0.0698517	0	0.138091	0	0.106849	0.0134534	0.0421574	0.195259	0.317908	0	0	0.0467304	0.0135207	0.368784	0.0404395	1
0.448147	0.337523	0.332311	0.268085	0.103902	0.146908	0.182234	0.412	0.103509	0.105941	0.521789	0.111728	0.245854	0.047628	0.00375363	0.284695	0.585738	1
0.494825	0.308933	0.0271009	0	0	0.668305	0.228274	0	0.0531032	0.627035	0.117028	0.875678	0.699514	0.296658	0	0.0446475	0.284957	1
0.0973119	0.354333	0.083689	0.12174	0	0	0.0334422	0.32592	0.182935	0.174373	0	0	0	0.0082931	0.0579225	0.0671901	0.0907237	1
0.189535	0.0918377	0.100307	0	0	0	0	0	0.038185	0	0	0	0.538061	0.207038	0	0	0	1
0.0372708	0.00677784	0.23142	0	0	0	0.0234609	0.0556435	0.0103171	0.0629317	0.0950083	0.197142	0	0.0881589	0	0.135436	0.121475	1
0.412973	0.860811	0.152902	0.163149	0	0	0.429151	0.584224	0.582196	0.866132	0.471311	0.182468	0.268267	0.0273514	0.017934	0.132866	0.0872141	1
0.279795	0.366778	0.148966	0.201015	0.14842	0	0.0628366	0	0.0317784	0	0.0880147	0	0	0.0907888	0.00829992	0.116763	0.00989564	1
0	0.0420272	0	0	0	0	0.595447	0.358553	0	0.0809235	0	0	0	0.0599757	0	0	0	1
0.174967	0.23138	0.0794456	0.141524	0.0877442	0	0.0682401	0.00413955	0.0432508	0.0806808	0.0850991	0	0	0.063088	0.0155737	0.226849	0.0247218	1
0.34585	0.430146	0.127053	0	0.0250459	0	0.0752926	0.0036511	0.0976229	0.0484432	0.118879	0	0	0.221527	0.129876	0.243092	0.26706	1
0.707913	0.430359	0.442377	0.502022	0.471319	0.324569	0.365747	0.369291	0.342052	0.118247	0.072743	0.230089	0.209328	0.479163	0.57519	0.440911	0.803483	1
0.315588	0.688519	0.82372	0.298352	0.389565	0.463578	0.206	0.225731	0.401146	0.196683	0.630588	0.671393	0.0943467	0.0881962	0.115456	0.173864	0.756262	1
0.214134	0.0806764	0.435527	0.272094	0	0	0.216936	0.584189	0.702214	0.592263	0.638622	0.912568	0.172181	0.621332	0.147991	0.794041	0.42611	1
0.183504	0.00702003	0.0559329	0.156399	0.0436223	0.523468	0.0985351	0.0284658	0.229962	0.0518436	0.156902	0.0872131	0.24486	0.0528756	0.691329	0.629765	0.664886	1
0.508581	0.0566875	0.292542	0.117658	0	0	0.173172	0.244395	0.73036	0.120332	0.0507702	0.0496255	0	0.0576089	0.629048	0.499796	0.240509	1
0.213008	0.262646	0.016869	0	0	0	0.318396	0.601415	0	0.170887	0.536785	0.02671	0	0	0.338894	0.211223	0.204649	1
0.079754	0.555923	0.422391	0.365357	0.14192	0	0	0.157375	0.359281	0.0511619	0.0967521	0.0169069	0.0207599	0.0101036	0	0.111217	0.722692	1
0.554724	0.569458	0.788782	0.0598796	0	0	0	0.0252267	0.0200327	0.0321414	0.00260125	0.106625	0	0	0.0234849	0.0195426	0.736162	1
0.321991	0.0776873	0.349261	0.0306482	0	0	0.0700587	0.0571383	0.289826	0.313659	0.456607	0.622945	0.337592	0.149874	0.0516839	0.00881216	0.232143	1
0.329351	0	0	0	0	0	0	0	0.359837	0.238489	0.0279074	0.576592	0.0462179	0	0	0.660365	0.616729	1
0.137633	0.0610523	0.270839	0.271167	0.154049	0.302336	0.0773777	0.143287	0.663763	0.623157	0.184618	0.241341	0.0343272	0.207126	0.261477	0.0777477	0	1
0.193723	0.243701	0.41287	0.104167	0.0939852	0.0472624	0.243422	0.0780024	0.00362675	0.229929	0.0147172	0.0524879	0.0158466	0.0289844	0.293355	0.109248	0.16451	1
0.70147	0.738474	0.993161	0.483163	0.0210888	0	0.441063	0.576225	0.0897932	0.316837	0.372193	0.0246014	0.468937	0.385962	0.0254918	0.0616975	0.642256	1
0.0435611	0.0402065	0.0581702	0	0	0	0	0.095516	0.183631	0.027481	0.0254108	0.230136	0	0.178568	0.260387	0.143071	0	1
0	0	0	0	0	0	0	0	0	0	0	0	0	0	0.0919859	0	0	1
0.453857	0.212314	0.125502	0.113463	0.00117451	0.00883696	0	0.0563046	0.0447879	0	0.368055	0.610116	0.610116	0.122023	0	0	0.0818449	1
0.312946	0.101315	0.122878	0.0557411	0.379428	0	0.0863671	0.177868	0.247105	0.397263	0	0	0.157618	0.168134	0.0984997	0	0.277124	1
0.169664	0.262114	0.859222	0.599852	0.066329	0.00729032	0.131	0.361419	0.188283	0.587079	0.158364	0.492426	0.454079	0.417403	0.116524	0	0.197155	1
0.660823	0.0188999	0.0308345	0.0247071	0	0.638636	0.862606	0.800991	0.420779	0.323488	0.110062	0.413018	0.525112	0.578888	0.177198	0	0.392851	1
0.267135	0.0360667	0.00516893	0	0	0.0103317	0	0.249911	0.383668	0.136996	0.0708066	0.0391083	0.0380752	0.0873292	0.0770523	0.0353943	0.448943	1
0.26957	0	0	0	0.345686	0.622235	0.553098	0.600517	0.583836	0.575301	0.111591	0.219098	0	0	0	0	0	1
0.300604	0.0276744	0.0113076	0.102122	0.263321	0.149336	0	0.170119	0.0292834	0.0573635	0	0.0631577	0	0.114456	0	0.00246516	0.0380737	1
0.565213	0.0083765	0.239057	0	0.063471	0.383084	0.355705	0.268599	0.304368	0.426923	0.00911726	0	0.0799612	0	0	0	0.31597	1
0.263506	0.562298	0.268337	0.328065	0.664709	0.280157	0.28647	0.136498	0.431396	0.0682664	0	0.201171	0.225267	0	0.135013	0.00726276	0.344874	1
0.970671	0.0490017	0.0259599	0	0.252988	0.312718	0.151793	0	0.100793	0.219624	0.117891	0.383146	0.383146	0.0766293	0.238727	0	0.42565	1
0.446991	0.194597	0.0316963	0	0	0	0.0435319	0.0890616	0.519321	0.46618	0.334868	0	0	0	0.0513877	0	0.59565	1
0.800704	0.0295294	0.0533836	0	0.263674	0.527349	0.351566	0	0.163056	0	0	0	0	0	0	0	0.255323	1
0.223338	0.344406	0.539172	0.534481	0.499787	0	0	0.586564	0.220468	0.583965	0	0	0	0	0	0	0.123842	1
0.215058	0.366201	0.556019	0.592002	0.180519	0	0	0.133209	0.123051	0.307404	0.0701334	0.229745	0.176245	0	0.0452113	0	0	1
0.284958	0.137454	0.0497709	0.152549	0	0	0	0	0.0831578	0.00959256	0.102416	0.191774	0.159812	0	0	0	0.248652	1
0.849225	0.0127271	0.208684	0.499774	0	0	0.23886	0.413714	0.460022	0.36939	0.0858334	0.0975068	0.423342	0.467754	0.356818	0.0767704	0.232778	1
0.245718	0.0161563	0.00550939	0	0	0.0032233	0.0390826	0	0.282555	0.0854867	0.0959301	0.330258	0.906236	0.620777	0.404342	0.814214	0.793445	1
0.273445	0.225487	0.195321	0.0368464	0.00105261	0.0019217	0.13653	0	0.295737	0.0233805	0.038765	0	0	0.0612955	0.0667554	0.272503	0.598768	1
0.0255466	0.0819404	0	0	0	0	0	0	0	0	0.85242	0.435542	0	0	0.214016	0	0.451187	1
0.432127	0.196764	0.323544	0.106808	0.188727	0.301817	0.463848	0.34304	0.0654368	0.304755	0.401861	0.0954389	0.370642	0.110835	0.11017	0.18396	0.135883	1
0.268877	0	0	0.00778468	0.064901	0.0206223	0.0451903	0.274663	0.489776	0.321281	0	0	0	0	0.074823	0.322333	0.419754	1
0	0	0	0	0	0	0	0	0	0	0	0	0	0	0	0	0	1
0.68955	0.694966	0.61886	0.956467	0.441504	0.945428	0.83824	0.562758	0.318027	0.396434	0.0431618	0	0	0.168256	0.0475648	0.218391	0.494816	1
0.419136	0.0506455	0	0.0409343	0.218723	0.289603	0.204769	0.0377542	0.00456869	0.0495225	0	0	0	0	0	0.108289	0.124641	1
0.667351	0.346603	0.00214831	0.0230936	0	0.0109681	0.013355	0.0980732	0.220414	0.27181	0.105722	0.0617272	0.0864756	0.189105	0.187958	0	0.119192	1
0.434783	0.58284	0.411581	0.786379	0.150449	0.141139	0.442277	0.812744	0.888014	0.372469	0.0821465	0	0	0.141066	0.182754	0.220352	0.137675	1
0.236283	0.0845829	0	0	0	0.103139	0.833916	0.485154	0.129993	0.766818	0	0	0.618831	0.538337	0.759505	0.765968	0.450854	1
0.132471	0.692038	0.41742	0	0.111308	0.0255804	0	0.0662278	0.080124	0.122106	0.0273335	0	0	0	0.449522	0.688731	0.76605	1
0.335039	0.0237045	0.0598057	0.0465462	0.0708192	0.25967	0.25967	0.119848	0.251206	0.587222	0.920771	0	0.157334	0.446981	0.784003	0.0156123	0.977599	1
0.549628	0.0285147	0.234449	0.0518579	0	0.121314	0.27702	0.0288244	0.0756908	0.188273	0.236017	0.323287	0.121662	0.0930577	0	0.306365	0.713803	1
0.31192	0.0172332	0	0.104416	0.0136353	0.00865277	0.0307654	0.160329	0.0940545	0.207886	0	0.0512145	0	0	0	0	0.0255137	1
0.692751	0.0311055	0.168858	0	0	0	0.124851	0.806732	0.895124	0.472867	0	0.38208	0.0208423	0	0	0	0.484343	1
0.29729	0.769907	0.708085	0.648691	0.0959107	0.0127208	0	0	0.101801	0.0400463	0.687449	0.233837	0.0174169	0.38651	0.306061	0.144286	0	1
0.51354	0.0304963	0.364588	0	0	0.130532	0.15767	0.115496	0.184572	0.83554	0.104295	0.318499	0.133707	0.261527	0	0	0.57524	1
0.471972	0.0906565	0.161771	0	0	0	0	0.0537811	0.0145407	0.0628408	0.00655765	0.00862218	0.112906	0	0	0.0635098	0.0768737	1
0.333042	0.052108	0.191916	0.245465	0	0	0	0.192905	0.179886	0	0.0881556	0	0.28909	0.118981	0	0	0.425964	1
0.150748	0.0787381	0.0143845	0.0503513	0.101532	0.0252279	0	0.117208	0.284023	0.0248837	0.00333197	0.0155944	0.0266161	0	0	0	0	1
0.207889	0.361838	0.38336	0.249997	0	0.0123497	0.175766	0.449024	0.251231	0.27981	0.662961	0.495226	0.634786	0.947771	0.329282	0.0940099	0.545885	1
0.461868	0.0520551	0	0	0	0	0	0	0.495076	0.126224	0.102071	0.059063	0.0223687	0.184126	0.337564	0	0.904658	1
0.3829	0	0.0798952	0.295678	0.0579346	0.0599347	0	0.0474456	0	0.129003	0.0135295	0.173909	0.121499	0.262366	0	0	0	1
0.11638	0.0602123	0	0	0	0.0650573	0	0.0270033	0	0.061668	0.0479759	0.121474	0.725799	0.512087	0	0.102485	0.322016	1
0.431949	0.123307	0	0.0173664	0	0	0	0.0168573	0.00305745	0.135956	0.0776891	0.451293	0.823026	0.41796	0.759162	0.570755	0.582828	1
0.878725	0	0	0	0	0	0	0.777874	0.695022	0.261491	0	0.19568	0	0.168589	0.0597485	0	0	1
0.435517	0.110346	0	0	0	0	0	0	0	0.228384	0.570502	0.105152	0.150096	0.409351	0.102338	0	0.152653	1
0.709614	0	0	0	0	0	0	0	0	0	0.440715	0	0	0	0	0	0	1
0	0	0	0	0	0	0	0	0.383863	0.192782	0	0.457775	0	0	0	0	0	1
0.103193	0	0	0	0	0	0	0.208525	0.211583	0.138946	0.0744373	0.0494568	0	0.166199	0.38595	0.120102	0.182833	1
0.108643	0	0	0	0	0	0.042062	0.728449	0.646841	0.252252	0.0586448	0	0	0	0	0.399965	0.0660418	1
0.123145	0	0.0855684	0	0	0.0802796	0.132461	0	0.458669	0.49794	0.0788109	0.297355	0.0768339	0	0	0.102682	0.223842	1
0.931045	0	0.276758	0	0	0	0	0	0.544944	0	0.196978	0	0	0	0.218628	0	0	1
0.247521	0.168828	0.0921257	0	0	0	0	0	0	0.0333806	0	0	0	0	0	0	0.47185	1
0.92254	0	0	0	0	0	0	0	0	0	0	0	0	0	0	0.675482	0.0605109	1
0.337433	0.0646789	0	0	0	0.0368127	0	0	0.0353654	0.148214	0	0	0	0	0	0	0	1
0.211118	0	0.0495163	0.0530396	0.0729295	0	0	0.0806073	0.128103	0.150825	0	0.281336	0	0	0	0	0	1
0.746504	0.385166	0	0	0	0	0	0	0.0251213	0.040045	0.136275	0	0.0802715	0	0	0	0.840068	1
0.433257	0.278568	0	0	0	0	0.0447018	0.480965	0.392148	0.103305	0	0	0	0	0	0	0.942911	1
0.683461	0.113137	0.0273761	0.12054	0	0.0800424	0.108958	0.162214	0.315492	0.331347	0.0161867	0.0528483	0	0	0.153408	0.214538	0.92457	1
0.550444	0.158048	0.851456	0.38178	0.0814502	0.0167594	0.22908	0.294769	0.293747	0.270857	0.189732	0.367198	0.27297	0.398997	0.357406	0.467733	0.136988	1
0.189535	0	0	0.170751	0	0	0	0.0662127	0.347382	0.648438	0.0569528	0.043758	0.0517687	0	0	0.0603849	0.402922	1
0.391023	0	0	0	0	0	0	0	0	0	0	0	0.352364	0	0	0	0	1
0.919224	0.0587191	0	0	0.0250839	0.115333	0	0	0.0297083	0.0631156	0.0349474	0	0	0	0	0	0	1
0.651306	0	0	0	0	0	0	0	0	0	0	0.168788	0	0	0	0	0	1
0.0153517	0	0.353195	0	0	0	0	0.232306	0.139551	0.481232	0.135626	0.00637523	0	0	0	0	0	1
0.95111	0	0	0	0	0	0	0	0.0972454	0	0	0.0280917	0	0	0	0	0.17224	1
0.184149	0.0151389	0.477794	0.156711	0.0646867	0.295361	0.0155395	0	0.16275	0.00509839	0	0.0517818	0	0	0	0	0.0271378	1
0.245769	0	0	0	0.136245	0.373701	0.287472	0	0.75658	0.254947	0.300549	0	0	0	0	0	0.727159	1
0.0546237	0.245505	0	0	0.157634	0.788172	0.525448	0.102518	0.0790103	0.0877244	0	0.0881259	0.0138362	0	0	0	0.0114895	1
0.0407212	0	0.0311703	0.044679	0.0169873	0.0476757	0.0489443	0.397075	0.349339	0.208995	0.392277	0.132276	0.386692	0.159684	0.0958104	0.082694	0	1
0	0	0	0	0	0	0.0801791	0.781731	0.492191	0.493217	0	0	0	0	0	0	0.0420331	1
0.528426	0.739656	0	0	0	0	0	0.0796206	0.0233108	0.361218	0	0	0	0	0	0	0.0846879	1
0.00528253	0.721951	0.324854	0	0	0	0.0123507	0.318577	0	0	0.391071	0	0	0	0	0	0	1
0.0892553	0	0.232774	0	0	0	0.0595984	0	0.248535	0	0	0	0	0	0	0	0	1
0.0159348	0.172188	0	0	0	0	0.0557099	0	0.286889	0.236218	0	0	0	0	0	0	0	1
0	0	0	0	0	0	0	0.133914	0.410162	0.473472	0	0	0	0	0	0	0	1
0.0255509	0.136138	0.0596702	0.308443	0	0	0.463003	0	0.335201	0.127168	0.0979562	0.177116	0.311451	0	0	0	0.059243	1
0.263132	0.334149	0	0	0	0	0	0.370975	0	0.182016	0	0	0	0	0	0	0	1
0.0406741	0.146379	0.474042	0.508655	0.218618	0.397437	0.415817	0.858967	0.66636	0.294399	0.684043	0.233032	0.795216	0.329608	0.563714	0.659029	0.70708	1
0.100447	0	0.685225	0	0	0	0.0738161	0.370344	0.24969	0.277059	0	0	0	0	0.511863	0.224995	0.141573	1
0.494954	0	0	0.857912	0.656872	0.0418645	0.338057	0.661343	0.79515	0.0928551	0.358526	0.290093	0.808813	0	0	0	0.0718942	1
0.074223	0	0.021344	0.113657	0.202085	0	0	0.327514	0.33962	0.106798	0	0	0	0	0.610475	0	0.0349424	1
0.202071	0	0.83248	0	0	0	0	0	0.228742	0.368607	0	0	0	0	0	0	0	1
0.0510064	0.183608	0	0	0.0561343	0.0652131	0.414475	0.562296	0.697506	0.421938	0.795278	0.559995	0.393216	0.0186693	0.0145381	0.322127	0.271645	1
0.0889676	0.0775707	0	0	0	0.0598897	0.0443496	0.320339	0.12849	0.137477	0.0826853	0.0331601	0.00684496	0.0790164	0.135441	0	0.148369	1
0.330685	0.27252	0.278922	0.308826	0.868482	0.944693	0.531034	0.454276	0.461912	0.10616	0.158929	0.375781	0.552019	0.746119	0.835089	0.82281	0.934866	1
0.399254	0.139353	0.404596	0.461022	0.225239	0.205412	0.165644	0.0717745	0.0204816	0.226018	0.0270947	0.0836436	0.289702	0.436557	0.573979	0	0.127106	1
0.365069	0.199296	0.10742	0.121156	0.117592	0.0881942	0	0.0497506	0.048196	0.109109	0.28538	0.51735	0.197235	0	0.313713	0.680514	0.435675	1
0.270754	0.281688	0.729367	0.908291	0.609182	0.26931	0.206722	0.233912	0.122844	0.289745	0.0813082	0.144443	0.305504	0.450904	0.696268	0.689202	0.57317	1
0.396942	0.104919	0.350673	0.206409	0.200338	0.200338	0.254743	0.220305	0.132239	0.33221	0.114799	0.141687	0.164976	0.319692	0.453974	0.49752	0.52687	1
0.170589	0.183606	0	0	0	0	0.150116	0.146595	0.673212	0.430216	0.0901985	0.0666467	0.493137	0.761462	0.784536	0.0980671	0.132123	1
0.318724	0.237458	0	0	0	0	0	0	0.259914	0	0.156435	0	0	0	0.29413	0.0399893	0.184965	1
0.381244	0.612797	0.370884	0	0	0	0	0	0.39983	0.881234	0.135651	0.0502781	0.0434255	0.135045	0.889632	0	0.168543	1
0.104702	0.123158	0.0703759	0	0	0	0	0.120975	0	0.0879622	0	0.0620035	0	0.106171	0.83142	0.101034	0.633792	1
0	0	0	0	0	0	0	0	0	0	0	0	0	0	0	0	0.94749	1
