# Supplementary material for: Adolescent neurostimulation of dopamine circuit reverses genetic deficits in frontal cortex function
Source: eLife. 2023 Oct 13;12:RP87414. doi: 10.7554/eLife.87414 (PMC10575630; doi:10.7554/eLife.87414)
Supplement: Figure 5—source data 1. [file elife-87414-fig5-data1.xlsx]

## Sheet: Sheet1
Figure 5a			Figure 5b			Figure 5c			Figure 5d
Ctrl	Gq		Ctrl	Gq		Ctrl	Gq		Ctrl	Gq
60.4167	73.0769		74.1936	54.5455		61.5385	40.9091		62.7907	42.8571
47.5	73.0769		52.5	68		60	58.6207		44.4444	53.8462
65.2174	71.4286		58.6957	69.7674		45	56.5217		64.7059	58.3333
57.4468	60.8696		40	59.375		60	40		55.2632	66.6667
61.7647	65.7143		46.4286	61.3636		52.9412	48.3871		56.8965	66.6667
57.6923	59.2593		65.2174	50			43.5897		63.3333	61.3636
66.6667	76		55.1724	77.2727						56.7568
			48.2759	66.6667
			62.7907	65.3846
			58.3333	76.9231
			52.6316	62.8571
P value	0.0233		P value	0.0309		P value	0.1182		P value	0.9711
t	2.598		t	2.322		t	1.727		t	0.03708
df	12		df	20		df	9		df	11
Figure 5 – figure supplement 1a						Figure 5 – figure supplement 1b						Figure 5 – figure supplement 1c						Figure 5 – figure supplement 1d
Totla entries			Right-Left turns			Totla entries			Right-Left turns			Totla entries			Right-Left turns			Totla entries			Right-Left turns
Ctrl	Gq		Ctrl	Gq		Ctrl	Gq		Ctrl	Gq		Ctrl	Gq		Ctrl	Gq		Ctrl	Gq		Ctrl	Gq
48	26		30.6122	74.0741		31	33		59.375	58.8235		13	22		71.4286	56.5217		43	49		29.5454	42
40	26		43.9024	71.4286		40	25		68.2927	53.8462		25	29		46.1538	62.5		18	26		36.8421	29.6296
23	35		50	51.3513		46	43		53.1915	27.2727		20	23		63.6364	30		34	24		34.2857	52
47	23		45.7143	54.1667		15	32		50	63.6364		40	15		53.6585	50		38	30		69.2308	61.2903
34	35		43.75	27.7778		28	44		51.7241	31.1111		17	31		33.3333	41.4634		58	30		52.5424	58.0645
26	27		44.4444	50		23	24		25	56			39			46.875		60	44		57.377	26.6667
24	25		53.8462	19.2308		29	22		50	69.5652									37			50
						29	24		46.6667	64
						43	26		43.1818	53.5714
						24	26		50	77.7778
						19	35		25	69.4444
P value	0.1725		P value	0.544		P value	0.8675		P value	0.1418		P value	0.5514		P value	0.4864		P value	0.3073		P value	0.9057
t	1.451		t	0.6245		t	0.1692		t	1.53		t	0.6187		t	0.7259		t	1.071		t	0.1212
df	12		df	12		df	20		df	20		df	9		df	9		df	11		df	11
