# Supplementary material for: Adolescent neurostimulation of dopamine circuit reverses genetic deficits in frontal cortex function
Source: eLife. 2023 Oct 13;12:RP87414. doi: 10.7554/eLife.87414 (PMC10575630; doi:10.7554/eLife.87414)
Supplement: Figure 6—source data 1. [file elife-87414-fig6-data1.xlsx]

## Sheet: Sheet1
Figure 6c			Figure 6e			Figure 6f			Figure 6g			Figure 6h
Ctrl	SSFO		Ctrl	SSFO		Ctrl	SSFO		Ctrl	SSFO		Ctrl	SSFO
-0.77537	42.3385		57.5758	73.3333		33	30		52.5	75.7576		40	33
6.2743	35.313		51.1628	61.9048		43	21		55.2632	67.5676		38	37
12.968	73.2741		64.2857	78.125		14	32		40.7407	58.8235		27	34
2.57248	46.77		57.6923	76.4706		26	51		62.5	59.375		24	32
16.3986	36.1277		55.8824	55.5556		34	45		63.6364	67.7419		22	31
			59.375	60.6061		32	33		64.7059	60.3774		34	53
			64	56.5217		25	46		51.6129	59.6491		31	57
			55.5556	69.5652		36	23		54.5455	84.6154		22	13
			60			30			54.386			57
P value	0.0009		P value	0.0276		P value	0.321		P value	0.0149		P value	0.5747
t	5.135		t	2.44		t	1.026		t	2.748		t	0.5737
df	8		df	15		df	15		df	15		df	15
Figure 6i																		Figure 6 - figure supplement 1a																		Figure 6 - figure supplement 1b
Time	Ctrl								SSFO									Time	WT								Arc-/-									Time	Ctrl							DREADD-Gq
15	1192.03	1048.42	1844.51	1775.17	1008.55	2066.09	1098.31	2515.88	1257.92	1072.44	2073.21	2653.4	1322.64	2208.14	2087.28	1947.67		15	511.654	245.674	562.081	982.995	1254.1	1122.71	777.764	719.54	733.85	791.18	811.707	1060.12	451.243	604.916	912.21	2332.62		15	2648.06	1955.75	1608.71	1468.53	743.5	1677.4	1198.55	995.44	1456.9	984.39	1284.31	1541.22	1178.75
20	2487.76	2038.4	3048.08	2988.78	1175.71	2821.27	2227.24	3528.46	1164.22	997.3	1456.14	2602.66	849.85	2049.33	1351.65	1810.73		20	516.516	992.394	686.79	937.157	850.655	1564.81	862.472	288.57	1766.19	724.711	786.929	1201.21	600.08	1116.19	1039.84	3521.22		20	2827.53	2433.41	2626.77	2109.5	637.17	3539.63	2533.54	2416.79	2249.93	1308.68	3099.42	3182.95	2196.4
25	2721.59	2768.05	3658.54	3480.12	1005.34	3380.36	2122.93	4084.3	1085.7	1019.37	1516.68	3039.84	532.21	2065.59	1587.41	1840.46		25	302.354	828.204	814.619	1007.72	497.159	968.877	666.159	501.68	3002.82	1106.09	1307.75	1242.88	1382.47	1465.58	1041.52	3468.57		25	3702.75	3084.7	2524.23	2331.6	1094.11	4787.15	2911.81	2773.18	2265.35	1270.79	4110.34	3211.59	3630.95
30	3144.28	3588.93	3908.07	4092.07	1316.17	3629.24	2016.35	4901.78	1509.54	806.06	1410.51	2935.02	537.23	2495.65	1992.03	2366.37		30	505.063	1246.88	871.858	783.679	779.701	1229.54	1327.81	271.71	3706.61	1327.92	1549.3	1833.08	837.824	1792.96	1189.69	3799.98		30	4466.4	3256.3	3121.65	2753.95	698.95	5060.02	3784.27	3906.65	2547.04	1249.78	5176.22	4288.82	4306.24
35	3416.27	4936.04	4056.06	4325.28	1389.51	3480.4	2865.49	5300.38	1282.93	532.71	1711.83	3170	651.15	3163.63	2139.56	2936.56		35	571.467	1994.54	1325.18	1174.04	438.074	1118.94	731.471	566.65	3723.8	1127.18	2121.77	2100.11	1970.38	1952.18	1326.29	4235.3		35	5570.85	3275.55	3958.07	3342.25	1367.82	6372.56	3845.04	4400.62	2950.17	1728.97	5239.4	4460.17	5264.07
40	3748.65	4793.2	3922.43	5080.07	1599.35	4224.33	2727.54	5681.9	995.64	359.22	1770.36	3674.93	814.67	3613.64	2066.84	3380.06		40	497.861	2068.04	1469.87	1318.38	1359.31	2106.81	923.702	288.78	4244.34	1063.48	1929.58	1860.47	2231.8	1577.94	1877.85	4899.58		40	5536.49	3302.13	3920.2	3676.74	1203.27	5994.01	4074.49	4470.08	2880.35	1658.71	4430.77	3066	4707.67
45	4657.73	4787.58	4220.32	5084.05	1545.94	4547.42	3185.73	5367.45	1015.22	359.25	2297.89	3835.54	1098.33	4041.57	1883.47	3859.38		45	706.836	2244.68	1585.08	1908.28	1256.61	2340.81	936.91	418.31	4209.23	1280.06	1715.62	2428.07	2322.89	2095.26	1410.55	4644		45	5894.18	3254.94	3582.05	3514.47	846.88	6635.26	3545.55	4238.84	3409.2	1821.69	5031.87	2626.99	4971.9
50	3914.52	4758.83	4258.29	4944.93	1463.17	3893.68	3179.51	5694.27	1449.5	196.3	2105.22	3914.83	1104.75	3788.87	1835.91	4197.75		50	746.343	2481.95	1165.57	2224.39	1641.59	2280.62	995.111	676.55	4342.7	1102.95	1829.14	2308.27	2555.18	1522.48	1964.2	4471.64		50	5537.39	3321.05	4023.97	3426.06	142.81	5994.28	3689.31	3535.32	3353.83	1873.69	4846.14	2813.42	4548.93
55	4531.36	4895.59	4718.52	5289.9	867.36	4087.72	3141.41	5612.73	1723.71	4.44	2937.38	4359.76	1151.5	4051.31	2203.32	4184.64		55	793.767	2544.74	1596.7	2045.84	1815.44	2394.78	871.364	598.31	3821.58	1641.67	1689.04	2148.18	2626.51	1983.93	1431.09	4342.25		55	4881.37	2895.68	4162.28	3699.46	306.07	5196.75	3725.01	3242.31	3619.39	1616.22	4539.97	2893.05	4613.9
60	4417.02	3901.98	4522.08	4371.14	1605.63	3629.92	2528.27	4681.67	1527.63	161.82	2823.54	4492.95	1507.04	4016.02	1999.92	3847.68		60	586.82	1316.63	1237.46	1791.13	1543.01	2286.34	1164.09	895.26	3861.34	1645.47	1374.42	2399.37	2779.87	1273.79	1781.77	3933.24		60	4463.86	2868.41	3772.15	3212.1	392.28	5222.69	3677.92	4260.65	3831.29	2054.33	4684.96	1708.74	3546.5
65	4043.72	2509.22	3341.4	4304.52	1244.86	3572.55	2438.9	4170.3	270.43	216	3208.27	3246.17	1705.12	3814.41	1870.48	4006.88		65	987.285	1446.5	1164.35	1869.67	1532.45	2523.76	782.223	1418.6	3180.53	1773.68	1731.8	2317.72	2794.48	682.799	1559.38	3645.88		65	3853.41	2819.14	3749.28	3154.91	105.28	5032.5	3146.16	3608.54	3088.98	2266.65	2222.06	1825.02	2180.33
70	4160.24	3039.53	2760.97	4549.2	834.93	3372.62	1862.92	3556.7	427.87	0.47	2819.21	4242.68	1546.19	3904.64	1860.32	3753.13		70	1486.1	1043.91	1532.26	1446.03	1264.78	2341.55	657.397	333.63	3508.89	1259.3	1497.51	1507.96	2319.69	1510.34	1254.2	3296.27		70	3375.76	3206.09	3514.31	2114.91	217.3	3929.25	2842.09	2750.14	2599.22	2424.47	2281.83	837.58	2289.43
	ANOVA table		SS	DF	MS	F (DFn, DFd)		P value											ANOVA table		SS	DF	MS	F (DFn, DFd)		P value											ANOVA table		SS	DF	MS	F (DFn, DFd)		P value
	Time x Treatment		16931570	11	1539234	F (11, 154) = 5.997		P<0.0001											Time x Genotype		4463989	11	405817	F (11, 154) = 2.613		P=0.0044											Time x Treatment		2408738	11	218976	F (11, 121) = 0.5454		P=0.8686
	Time		46780240	11	4252749	F (11, 154) = 16.57		P<0.0001											Time		26293378	11	2390307	F (11, 154) = 15.39		P<0.0001											Time		78489567	11	7135415	F (11, 121) = 17.77		P<0.0001
	Treatment		76913666	1	76913666	F (1, 14) = 5.316		P=0.0370											Genotype		39579496	1	39579496	F (1, 14) = 5.685		P=0.0318											Treatment		1354190	1	1354190	F (1, 11) = 0.08626		P=0.7745
	Subject		202552307	14	14468022	F (14, 154) = 56.37		P<0.0001											Subject		97476927	14	6962638	F (14, 154) = 44.82		P<0.0001											Subject		172685284	11	15698662	F (11, 121) = 39.10		P<0.0001
	Residual		39526302	154	256664														Residual		23921584	154	155335														Residual		48578995	121	401479
