# Supplementary material for: Adolescent neurostimulation of dopamine circuit reverses genetic deficits in frontal cortex function
Source: eLife. 2023 Oct 13;12:RP87414. doi: 10.7554/eLife.87414 (PMC10575630; doi:10.7554/eLife.87414)
Supplement: Figure 7—source data 1. [file elife-87414-fig7-data1.xlsx]

## Sheet: Sheet1
Figure 7c			Figure 7d			Figure 7– figure supplement 1a							Figure 7– figure supplement 1b
						Total entries			Right-Left turns				Total entries			Right-Left turns
WT	Disc1		Ctrl	Gq		WT	Disc1		WT	Disc1			Ctrl	Gq		Ctrl	Gq
67.9245	64.8649		59.4595	64.2857		53	37		39.4737	48.1482			37	28		36.8421	40.625
60.5263	55.1724		52.6316	73.3333		38	29		53.3333	53.8462			19	30		50	46.6667
66.6667	57.1429		64.7059	70.5882		24	42		56.8182	44			17	17		42.1053	50
72.973	53.3333		66.6667	73.3333		37	45		69.5652	50			45	30		65.2174	83.871
63.3333	69.2308		60	66.6667		30	26		66.6667	41.9355			25	18		73.0769	36.8421
51.7241	46.1538			67.9245		29	13		71.4286	60				53			57.4074
63.1579	69.2308					38	26		30.7692	46.1538
68.1818	65.2174					22	23		29.1667	65.2174
83.3333	50					12	20		28.5714	84.6154
70	58.3333					20	24		60	28.5714
P value	0.0435		P value	0.0119		P value	0.7159		P value	0.8203			P value	0.9254		P value	0.9307
t	2.171		t	3.139		t	0.3698		t	0.2305			t	0.9633		t	0.08943
df	18		df	9		df	18		df	18			df	9		df	9
Figure 7b
Time	WT 1 pulse						Disc1 1 pulse						WT 5 pulses						Disc1 5 pulses						WT 10 pulses						Disc1 10 pulses
20	0.026612	-0.03292	0.009361	0.075637	0.023486	0.029636	-0.01454	-0.00322	0.0152	-0.04069	0.039931	-0.01145	0.020923	0.029957	-0.04836	-0.02722	0.048375	0.051357	-0.00193	0.029812	0.025756	-0.00864	0.048253	-0.01273	0.029601	0.003515	0.046164	0.05184	0.026051	0.060663	0.101943	-0.002	-0.07355	0.039199	0.049238	-0.01774
20.351	0.027971	-0.04166	0.142502	0.086034	0.084994	0.047725	-0.01358	-0.01185	0.051715	-0.03632	0.082788	0.059697	0.028184	0.040935	0.084656	0.005505	0.142471	0.053152	0.001157	0.035816	0.039498	0.007572	0.07585	0.076155	0.023897	0.022976	0.237492	0.078921	0.195241	0.04719	0.118923	-0.00622	-0.04915	0.043878	0.065411	0.067952
20.702	0.02606	-0.02371	0.161749	0.119125	0.019663	0.052072	-0.00954	-0.02023	0.044198	-0.02472	0.076553	0.047282	0.037288	0.089889	0.110135	0.115363	0.040393	0.044508	0.020371	0.045972	0.030409	0.02288	0.0624	0.063723	0.019076	0.081434	0.27157	0.157316	0.048251	0.06741	0.095203	0.03543	-0.04761	0.054636	0.038353	0.061955
21.053	0.059096	0.041041	0.19384	0.235056	-0.01442	0.087949	0.016801	-0.01908	0.091301	0.062971	0.128849	0.08441	0.071827	0.132426	0.217795	0.25305	0.015134	0.070937	0.059226	0.069501	0.070174	0.093371	0.104442	0.122553	0.036169	0.138591	0.223521	0.247682	0.007595	0.149846	0.063812	0.091687	0.014621	0.085574	0.068438	0.128101
21.404	0.090237	0.090762	0.174178	0.326648	-0.03746	0.083701	0.036244	-0.01607	0.113262	0.149913	0.133205	0.078905	0.107769	0.181423	0.255512	0.342372	0.015701	0.072098	0.113028	0.078532	0.12101	0.147034	0.113904	0.143807	0.077821	0.197015	0.178124	0.280146	0.008927	0.196695	0.088864	0.146584	0.066652	0.111841	0.071546	0.106554
21.755	0.118808	0.117911	0.138455	0.352568	-0.04911	0.072242	0.037043	-0.009	0.092789	0.180438	0.116139	0.051167	0.133846	0.200443	0.199443	0.376327	0.012216	0.056465	0.140467	0.067341	0.135757	0.173648	0.095092	0.139782	0.109535	0.251658	0.151631	0.26955	-0.00098	0.196964	0.129202	0.179744	0.092484	0.123653	0.049811	0.066491
22.106	0.14186	0.125275	0.113696	0.339723	-0.05866	0.058487	0.020993	-0.00099	0.079728	0.180859	0.092249	0.023763	0.149602	0.209668	0.154708	0.365452	0.024835	0.033515	0.121929	0.054503	0.137967	0.173223	0.073043	0.136272	0.124042	0.272605	0.142213	0.239496	-0.01128	0.166253	0.135759	0.184787	0.10299	0.126757	0.030035	0.038516
22.457	0.158459	0.120552	0.095076	0.308924	-0.06863	0.050724	0.002577	0.014152	0.06702	0.174157	0.067087	0.014588	0.16919	0.204451	0.127401	0.354285	0.04362	0.007239	0.09699	0.060439	0.134364	0.169829	0.067899	0.139694	0.137237	0.288454	0.141711	0.21676	-0.01376	0.142932	0.142533	0.180312	0.097713	0.121411	0.01134	0.018829
22.808	0.151785	0.105458	0.087597	0.274671	-0.06738	0.034361	-0.01541	0.020151	0.048522	0.152802	0.056926	0.032487	0.194941	0.200991	0.116677	0.336352	0.054151	-0.01381	0.095746	0.06108	0.125796	0.160116	0.070283	0.127044	0.155259	0.308055	0.156479	0.18911	0.012267	0.118373	0.141549	0.17497	0.082126	0.121051	0.000852	0.0114
23.159	0.145215	0.092796	0.076841	0.237152	-0.05707	0.025749	-0.03854	0.016006	0.023407	0.124277	0.048906	0.030653	0.227034	0.208329	0.109904	0.317887	0.047685	-0.01555	0.108632	0.059878	0.11252	0.156697	0.049799	0.121267	0.172508	0.32148	0.180459	0.176114	0.037831	0.103932	0.15043	0.166062	0.078297	0.115216	0.001628	0.022068
23.51	0.138754	0.076671	0.070953	0.209798	-0.03361	0.023931	-0.04108	0.009392	-0.00082	0.099945	0.032866	0.0199	0.271912	0.208956	0.109258	0.297992	0.034925	-0.01908	0.127573	0.058495	0.099194	0.151859	0.033114	0.122796	0.19757	0.324033	0.184369	0.173493	0.062231	0.091445	0.158942	0.158108	0.078053	0.106856	0.01434	0.033807
23.861	0.12404	0.060123	0.051232	0.183075	-0.02644	0.019734	-0.04471	0.011105	-0.02425	0.073536	0.023843	0.010709	0.298655	0.225784	0.093437	0.27019	0.00829	-0.02301	0.129206	0.044538	0.081621	0.142103	0.024061	0.101888	0.213434	0.318967	0.190459	0.175879	0.064298	0.080331	0.156621	0.138851	0.069237	0.104619	0.008743	0.039217
24.212	0.119265	0.052435	0.04172	0.158963	-0.02564	0.017772	-0.02883	0.007239	-0.03105	0.051376	0.002887	-0.00118	0.314633	0.216359	0.080124	0.242497	-0.00024	-0.0303	0.116701	0.024136	0.066234	0.129745	0.019925	0.078845	0.227207	0.315904	0.183018	0.177492	0.077889	0.069246	0.163629	0.12409	0.069122	0.099532	-0.00122	0.043799
24.563	0.111443	0.049999	0.027014	0.137876	-0.02439	0.013477	0.010773	0.003007	-0.03356	0.038724	0.001075	-0.00142	0.323376	0.188509	0.062235	0.229387	-0.02608	-0.04513	0.106747	0.009683	0.054901	0.122101	0.00942	0.055962	0.237886	0.301694	0.18165	0.179717	0.076801	0.063652	0.172736	0.102078	0.059107	0.09473	-0.00058	0.040727
24.914	0.108086	0.054586	0.021511	0.117718	-0.01173	0.014172	0.028659	-0.00558	-0.01105	0.032757	-0.00343	0.002322	0.320048	0.186952	0.053941	0.217027	-0.03752	-0.04967	0.082891	0.00536	0.050969	0.106968	0.011011	0.048035	0.230826	0.288417	0.178683	0.18299	0.076316	0.06546	0.163961	0.085617	0.039915	0.080918	0.001369	0.034653
25.265	0.097987	0.051217	0.005005	0.104614	0.007526	0.003713	0.026871	-0.00973	0.00786	0.017647	-0.00688	0.006387	0.315682	0.177243	0.051284	0.20167	-0.02861	-0.05568	0.081296	-0.00151	0.049652	0.090399	0.003215	0.049094	0.237582	0.269101	0.176529	0.188922	0.093618	0.059349	0.152158	0.082635	0.03813	0.07151	0.003755	0.032155
25.616	0.10457	0.035803	0.007204	0.091024	0.029488	-0.00346	0.014103	-0.00346	0.018596	0.011556	-0.01003	0.005445	0.301989	0.158163	0.031273	0.188137	-0.02438	-0.05594	0.093374	-0.00117	0.049149	0.074875	0.001524	0.059215	0.228828	0.25692	0.16545	0.190209	0.113144	0.067306	0.143337	0.087153	0.038124	0.064131	0.003731	0.030256
25.967	0.102398	0.014541	0.004077	0.071408	0.047247	-0.01202	0.01267	-0.00296	0.01573	0.009684	-0.01118	0.005038	0.27519	0.13243	0.014319	0.174494	-0.02023	-0.05943	0.092571	-0.00503	0.05277	0.062017	0.010645	0.059148	0.223735	0.229197	0.160309	0.182729	0.093902	0.068911	0.148056	0.085448	0.036422	0.056281	0.000219	0.030092
26.318	0.102456	-0.00599	0.002951	0.058863	0.047318	-0.01503	0.00821	-0.01149	0.007407	0.008231	-0.01982	0.006759	0.253533	0.121747	0.008305	0.161618	-0.03081	-0.06076	0.080994	-0.00649	0.060199	0.054756	0.014335	0.051983	0.219988	0.201723	0.155552	0.179556	0.099991	0.065691	0.164598	0.0846	0.040266	0.052725	-0.00336	0.027476
26.669	0.100124	-0.02825	-0.00848	0.050143	0.046801	-0.0172	0.001369	-0.01729	0.001773	0.00514	-0.02628	0.008821	0.229277	0.11221	0.000868	0.14742	-0.0364	-0.0685	0.067858	-0.00439	0.055431	0.045754	0.017843	0.040917	0.217129	0.191415	0.147261	0.168353	0.10772	0.060592	0.164464	0.07566	0.03767	0.049688	0.006264	0.031918
27.02	0.094522	-0.03842	-0.02209	0.045347	0.042974	-0.01466	-0.00399	-0.01328	-0.00101	-0.00622	-0.03405	0.016904	0.210614	0.095775	-0.00714	0.139431	-0.02501	-0.0572	0.053517	-0.00213	0.043667	0.039785	0.016113	0.031081	0.216658	0.18399	0.144873	0.15919	0.111361	0.059631	0.15581	0.064595	0.033135	0.054014	0.015528	0.034239
27.371	0.091339	-0.0394	-0.0346	0.039473	0.057048	-0.01289	-0.00934	-0.00652	-0.00614	-0.00971	-0.03507	0.010897	0.192598	0.086188	-0.02474	0.127166	-0.02879	-0.04625	0.038798	-0.00113	0.043774	0.036909	0.006208	0.022877	0.216774	0.166112	0.143913	0.137654	0.111794	0.05032	0.140548	0.050282	0.043219	0.05218	0.007702	0.041255
27.722	0.095725	-0.04603	-0.02146	0.025546	0.040748	-0.00547	-0.02262	-0.00223	0.009939	-0.00483	-0.03306	0.010177	0.171853	0.075904	-0.04029	0.111221	-0.02419	-0.03631	0.016838	0.000607	0.053098	0.024685	-0.00774	0.014863	0.209369	0.14427	0.136077	0.126722	0.113576	0.043831	0.13009	0.034949	0.046907	0.045943	0.003681	0.05153
28.073	0.100058	-0.04096	-0.01033	0.020778	0.039896	0.000924	-0.02142	0.005331	0.01728	-0.00651	-0.02494	0.01175	0.152004	0.069154	-0.05298	0.098236	-0.01564	-0.03186	0.005199	0.005048	0.069236	0.017792	-0.01864	0.004119	0.201629	0.131811	0.132379	0.105721	0.119689	0.036433	0.137934	0.019935	0.04902	0.03358	-0.01267	0.046682
28.424	0.087645	-0.04235	0.001196	0.012844	0.042323	0.009439	-0.01856	0.010091	0.022845	-0.00808	-0.02769	0.004564	0.131527	0.058836	-0.05443	0.088445	-0.0154	-0.02314	-0.00283	0.005363	0.082845	0.0043	-0.01473	0.006519	0.18766	0.127247	0.135693	0.091564	0.122182	0.038927	0.14578	0.009266	0.050195	0.028829	-0.01775	0.054658
28.775	0.082722	-0.03	0.013244	0.008145	0.042622	0.024684	-0.02325	0.005258	0.029461	-0.01421	-0.03245	0.000521	0.104577	0.049334	-0.04994	0.07833	-0.01059	-0.01961	-0.01583	-0.00086	0.096011	0.000278	-0.00896	0.005629	0.181192	0.12037	0.127741	0.077368	0.115243	0.036997	0.139356	0.002177	0.054368	0.019888	-0.0129	0.064026
29.126	0.08244	-0.02867	0.002893	0.007095	0.056815	0.03305	-0.02776	0.005278	0.022044	-0.02225	-0.03641	0.007998	0.084663	0.030206	-0.05557	0.070605	0.002159	-0.02258	-0.01814	0.00016	0.109959	-0.01106	-0.00996	0.012159	0.167156	0.111969	0.138004	0.065382	0.09957	0.03725	0.127742	0.008306	0.049921	0.01521	-0.01845	0.058792
29.477	0.078388	-0.01827	-0.0018	0.007451	0.064726	0.030607	-0.02277	0.001527	0.016086	-0.03234	-0.03571	0.008707	0.069155	0.026364	-0.06475	0.062468	0.003015	-0.01995	-0.01112	-0.00089	0.111857	-0.01734	-0.01217	0.014459	0.158531	0.082648	0.130951	0.058337	0.094906	0.040605	0.125916	0.013875	0.045686	0.010602	-0.02401	0.058131
29.828	0.064917	0.000495	-0.00145	0.011727	0.058666	0.032322	-0.02184	0.00132	0.012876	-0.04016	-0.03	0.0061	0.062658	0.022418	-0.06124	0.056972	0.014908	-0.02096	-0.01186	-0.0041	0.105243	-0.02951	-0.01065	0.005177	0.15607	0.083135	0.117407	0.059473	0.094115	0.036008	0.11845	0.015321	0.03088	0.00152	-0.04067	0.048694
30.179	0.062097	0.007774	-0.01113	0.004009	0.04226	0.024793	-0.02758	0.007591	0.005783	-0.04056	-0.02665	0.003718	0.061488	0.027054	-0.07388	0.054751	0.022299	-0.01825	-0.01263	-0.00682	0.094669	-0.03279	-0.00912	0.00161	0.152473	0.068689	0.119995	0.057752	0.070038	0.036839	0.110057	0.018038	0.022561	-0.01034	-0.03823	0.047994
30.53	0.054447	0.014042	-0.00449	-0.00594	0.036383	0.01518	-0.03064	0.007478	0.008048	-0.04136	-0.02423	-0.00197	0.061048	0.031996	-0.07402	0.050443	0.044493	-0.02239	-0.00602	-0.01042	0.082864	-0.03044	-0.00245	0.003087	0.150812	0.047738	0.11197	0.053528	0.072387	0.037592	0.089763	0.025341	0.010349	-0.02418	-0.0448	0.041791
30.881	0.055198	0.008867	8.93e-05	-0.02126	0.044723	0.00993	-0.02467	0.016222	0.003685	-0.04378	-0.02683	-0.01209	0.044894	0.032639	-0.08078	0.045708	0.050758	-0.02557	-0.00807	-0.00837	0.077995	-0.0274	-0.01095	0.007842	0.124217	0.058248	0.110987	0.046499	0.079443	0.041874	0.08696	0.023675	0.006919	-0.02993	-0.0549	0.043057
31.232	0.056856	-0.00852	0.003563	-0.02464	0.043066	0.018151	-0.02263	0.010596	0.00091	-0.04806	-0.0209	-0.0056	0.031223	0.02882	-0.0634	0.04441	0.055474	-0.03165	-0.0133	-0.0148	0.07734	-0.02281	-0.00772	0.010787	0.113761	0.076478	0.107652	0.04144	0.087282	0.045715	0.088756	0.016229	-0.00271	-0.03141	-0.06646	0.032746
31.583	0.05882	-0.01803	0.014425	-0.02388	0.056056	0.012099	-0.0122	-0.00383	-0.0036	-0.05385	0.002733	-0.00155	0.020214	0.026052	-0.04769	0.045208	0.055646	-0.02823	-0.02789	-0.01895	0.075157	-0.02353	-0.00768	0.014625	0.097876	0.065619	0.092027	0.040341	0.089217	0.040534	0.085424	0.00248	-0.01225	-0.03188	-0.07601	0.022914
31.934	0.056696	-0.02923	0.016588	-0.01838	0.065206	0.005547	0.00908	-0.00952	-0.01167	-0.05841	0.015388	-0.00099	0.018311	0.028135	-0.04879	0.051284	0.055169	-0.01749	-0.03472	-0.01193	0.072605	-0.03224	-0.01301	0.021744	0.078544	0.066578	0.081442	0.037779	0.082795	0.042711	0.073075	0.008171	-0.01569	-0.03129	-0.07768	0.020078
32.285	0.056088	-0.03334	0.029654	-0.01993	0.057266	-0.00174	0.036116	-0.01014	-0.01435	-0.05633	0.02038	-0.00688	0.024049	0.031755	-0.0497	0.066988	0.05685	-0.00089	-0.04212	-0.01922	0.071059	-0.03395	-0.01342	0.010065	0.062962	0.061646	0.072108	0.029105	0.086863	0.042639	0.057877	0.013172	-0.02064	-0.03571	-0.08011	0.01459
32.636	0.05235	-0.03822	0.031267	-0.02342	0.045558	-0.00176	0.057587	-0.00591	-0.00315	-0.05797	0.024442	-0.00286	0.021337	0.046738	-0.05433	0.084414	0.050939	0.004414	-0.05523	-0.02674	0.063148	-0.04025	-0.01467	-0.00472	0.052536	0.053689	0.059233	0.033364	0.10586	0.037935	0.059247	0.018483	-0.02786	-0.03649	-0.06916	0.009543
32.987	0.045568	-0.04429	0.02545	-0.02601	0.055719	0.001282	0.06188	-0.0078	0.004278	-0.06666	0.020059	0.003226	0.00951	0.061621	-0.04551	0.09694	0.056767	0.009745	-0.06119	-0.02662	0.060225	-0.03985	-0.00381	-0.01019	0.048077	0.047054	0.051792	0.040206	0.092241	0.035551	0.044459	0.014499	-0.03244	-0.03945	-0.05785	-0.00042
33.338	0.035516	-0.04123	0.005723	-0.02447	0.062388	-0.00488	0.060785	-0.01031	-0.00986	-0.06687	0.008402	0.000691	0.006954	0.075641	-0.05461	0.100074	0.061696	0.006542	-0.0443	-0.02786	0.061134	-0.04794	-0.00055	-0.0158	0.038812	0.048902	0.042645	0.034277	0.084279	0.032095	0.018219	0.020029	-0.038	-0.0412	-0.0481	-0.0058
33.689	0.034531	-0.02749	0.000414	-0.01942	0.058421	0.005612	0.046169	-0.00434	-0.02448	-0.06484	0.006446	-0.00966	-0.00322	0.083272	-0.06444	0.101839	0.065992	-0.01212	-0.02081	-0.02769	0.046571	-0.05357	-0.00076	-0.01318	0.036871	0.04611	0.050995	0.033916	0.057471	0.03316	0.01033	0.016611	-0.03843	-0.03843	-0.04741	-0.01242
34.04	0.033567	-0.01779	0.006684	-0.00785	0.052651	0.018489	0.032586	0.007243	-0.03098	-0.05969	0.002884	-0.01602	-0.00897	0.083687	-0.07632	0.099452	0.071958	-0.02455	-0.00473	-0.02476	0.048616	-0.05777	-0.00146	-0.01302	0.019184	0.037097	0.042108	0.034902	0.045774	0.037539	0.005475	0.008946	-0.0351	-0.03961	-0.04428	-0.00754
34.391	0.035032	-0.00758	0.015259	-0.00723	0.031367	0.014829	0.030462	0.017665	-0.03057	-0.04183	-0.00031	-0.01494	-0.00516	0.081561	-0.06772	0.092962	0.071866	-0.02546	-0.00315	-0.02527	0.053878	-0.06413	-0.0035	-0.01005	0.014445	0.032671	0.028642	0.036519	0.045544	0.037253	-0.00115	0.001296	-0.03115	-0.04323	-0.03889	0.001434
34.742	0.028359	-0.01054	0.023191	-0.00533	0.022019	0.00546	0.036234	0.031916	-0.03553	-0.03375	0.00378	-0.00282	-5.9e-05	0.076744	-0.07099	0.090099	0.06358	-0.0244	-0.00312	-0.03338	0.047951	-0.07024	-0.00837	-7e-05	0.004722	0.023549	0.027345	0.029419	0.035222	0.045382	0.003323	-0.00428	-0.03563	-0.05306	-0.03439	0.006843
35.093	0.016005	-0.00887	0.027734	-0.00156	0.016523	-0.00738	0.05987	0.040237	-0.03419	-0.02951	-0.00424	0.001769	-0.0077	0.066748	-0.06687	0.080716	0.060967	-0.0142	-0.0199	-0.04116	0.046492	-0.06167	-0.01645	5.05e-05	-0.01115	0.023327	0.020771	0.014396	0.031415	0.04422	-0.00115	-0.00818	-0.03547	-0.05443	-0.05221	0.018707
35.444	0.010574	-0.01701	0.011269	0.00182	0.014732	-0.00662	0.063752	0.04085	-0.0336	-0.03329	-0.01286	-0.00115	-0.02244	0.055911	-0.05671	0.068408	0.067692	-0.00493	-0.03675	-0.04596	0.039049	-0.05693	-0.02048	-0.01137	-0.03275	0.028319	0.024843	0.002802	0.021229	0.031205	0.007884	-0.01337	-0.04008	-0.0564	-0.04634	0.019488
35.795	0.013882	-0.02057	0.0024	-0.00086	0.030322	-0.00491	0.077084	0.043789	-0.02824	-0.03862	-0.01556	-0.01345	-0.03511	0.047535	-0.03821	0.057776	0.075044	-0.0059	-0.04713	-0.04263	0.03324	-0.05624	-0.01769	-0.01599	-0.04934	0.02748	0.031354	-0.00293	0.030488	0.02185	0.003914	-0.01193	-0.0458	-0.06146	-0.0465	0.022203
36.146	0.01202	-0.03282	-1.3e-05	-0.00948	0.034419	0.008958	0.091852	0.052521	-0.02114	-0.03404	-0.02358	-0.02013	-0.03496	0.049783	-0.04745	0.049719	0.074344	-0.02463	-0.0641	-0.03078	0.028057	-0.05988	-0.01219	-0.00502	-0.06346	0.030565	0.016538	-0.00519	0.038305	0.012009	-0.0041	0.001438	-0.04639	-0.07198	-0.04628	0.013596
36.497	0.020019	-0.04368	0.0031	-0.01587	0.052461	0.018208	0.095334	0.059703	-0.02312	-0.02589	-0.02816	-0.02967	-0.04175	0.053905	-0.04675	0.041108	0.061229	-0.03292	-0.06992	-0.02087	0.025071	-0.07074	-0.00745	-0.00859	-0.05941	0.029246	0.028466	-0.00599	0.010875	0.010918	-0.00792	0.008026	-0.04638	-0.07948	-0.03912	0.007355
36.848	0.011374	-0.04497	-0.00333	-0.02093	0.064019	0.019499	0.079777	0.056319	-0.0224	-0.02333	-0.02327	-0.03188	-0.04573	0.052458	-0.04856	0.029943	0.048177	-0.04437	-0.06976	-0.00424	0.023275	-0.08432	0.004057	-0.00238	-0.05108	0.029862	0.017528	-0.00093	0.003413	0.027315	-0.01177	0.000438	-0.05534	-0.08868	-0.0387	0.00865
37.199	0.011159	-0.0351	0.001729	-0.01811	0.069495	0.018532	0.055252	0.052508	-0.01764	-0.0288	-0.01806	-0.00926	-0.03912	0.057661	-0.06817	0.026091	0.043094	-0.05315	-0.06201	0.008788	0.015731	-0.08698	0.015296	0.003199	-0.05995	0.028345	0.021309	0.00189	0.000661	0.053084	-0.01563	-0.0102	-0.0622	-0.09798	-0.04575	0.009228
37.55	0.007218	-0.0219	-0.00197	-0.02089	0.062363	0.011283	0.031879	0.05407	-0.01503	-0.03439	-0.01296	0.00541	-0.03258	0.043437	-0.08288	0.02257	0.048542	-0.04977	-0.06176	0.009342	0.011964	-0.08301	0.013073	0.00458	-0.06723	0.029529	0.025414	-0.00146	0.0065	0.069402	-0.02954	-0.02234	-0.06598	-0.10738	-0.03469	0.005859
37.901	0.000424	-0.0109	-0.00489	-0.01859	0.055286	0.004658	0.021331	0.046885	0.003947	-0.02586	-0.00809	0.005307	-0.0316	0.02944	-0.09471	0.022347	0.049954	-0.03173	-0.06148	-0.0011	0.012079	-0.07766	0.005024	0.000162	-0.07711	0.032579	0.02315	-0.00454	0.010353	0.067015	-0.03745	-0.03924	-0.06432	-0.11029	-0.02791	-0.00123
38.252	0.008431	-0.01102	-0.0214	-0.01325	0.051672	0.007732	0.002546	0.036049	0.015758	-0.02451	-0.00242	-0.00923	-0.03794	0.01863	-0.10094	0.018984	0.041203	-0.01192	-0.05807	-0.00675	0.019661	-0.06895	-0.00608	0.004232	-0.08033	0.037999	0.006062	-0.0048	0.030811	0.064852	-0.03771	-0.04447	-0.05353	-0.1054	-0.02782	-0.00014
38.603	0.007673	-0.0128	-0.02335	-0.00695	0.068294	0.01022	0.002194	0.039171	0.027057	-0.02792	-0.00846	-0.01904	-0.0412	0.012151	-0.10364	0.017139	0.038852	-0.00417	-0.05894	-0.00287	0.033841	-0.05726	-0.01023	0.006816	-0.08244	0.032853	-0.00255	-0.00157	0.055374	0.058142	-0.03335	-0.04731	-0.05054	-0.0996	-0.01865	-0.01165
38.954	0.017271	-0.01996	-0.02045	0.007558	0.058747	0.009414	0.011156	0.032364	0.032191	-0.03619	-0.01339	-0.02353	-0.04184	0.010859	-0.0862	0.014455	0.042308	-0.01331	-0.05944	0.003902	0.039565	-0.0413	-0.0075	0.012796	-0.07489	0.036881	-0.01588	0.004296	0.064285	0.048162	-0.03057	-0.05158	-0.04958	-0.10018	-0.01642	-0.00856
39.305	0.018163	-0.02459	-0.01312	0.02292	0.049218	0.007301	0.022023	0.032019	0.029501	-0.04932	0.004052	-0.01942	-0.03766	0.016071	-0.08575	0.027312	0.036415	-0.01998	-0.06252	0.007997	0.042879	-0.02555	-0.00753	0.01749	-0.07801	0.042278	-0.01644	0.013754	0.06881	0.051179	-0.02686	-0.04719	-0.05984	-0.10045	-0.02074	-0.01345
39.656	0.025605	-0.02403	-0.00463	0.04303	0.042917	0.010702	0.036395	0.03719	0.033193	-0.06164	0.016145	-0.02666	-0.03934	0.018872	-0.0743	0.026923	0.023528	-0.03322	-0.0652	0.013598	0.040495	-0.02332	-0.00316	0.016215	-0.08373	0.042528	-0.00764	0.019764	0.079102	0.07336	-0.03705	-0.05467	-0.07452	-0.10294	-0.02571	-0.00975
40.007	0.036301	-0.02298	-0.00377	0.057112	0.02658	0.009826	0.046938	0.046088	0.023409	-0.06737	0.024535	-0.03556	-0.03729	0.009339	-0.07316	0.027552	0.007624	-0.03251	-0.06985	0.018624	0.031102	-0.03665	0.000533	0.014268	-0.08996	0.047936	-0.01274	0.023803	0.086033	0.085262	-0.02665	-0.05521	-0.08237	-0.10296	-0.02509	-0.01405
40.358	0.025475	-0.02159	0.006712	0.071014	0.026013	0.02442	0.061413	0.035659	0.025907	-0.07591	0.039577	-0.02421	-0.04734	0.002896	-0.07911	0.032308	0.012199	-0.02613	-0.07085	0.0229	0.024292	-0.04634	0.002381	0.016668	-0.09655	0.047774	-0.01281	0.027051	0.08925	0.080359	0.003216	-0.06054	-0.08659	-0.10476	-0.03361	-0.01812
	1 pulse												5 pulses												10 pulses
	ANOVA table		SS	DF	MS	F (DFn, DFd)		P value					ANOVA table		SS	DF	MS	F (DFn, DFd)		P value					ANOVA table		SS	DF	MS	F (DFn, DFd)		P value
	Time x Genotype		0.0592	58	0.001021	F (58, 580) = 0.5244		P=0.9986					Time x Genotype		0.07237	58	0.001248	F (58, 580) = 0.4838		P=0.9996					Time x Genotype		0.06543	58	0.001128	F (58, 580) = 0.5093		P=0.9991
	Time		0.5069	58	0.008739	F (58, 580) = 4.490		P<0.0001					Time		1.68	58	0.02897	F (58, 580) = 11.23		P<0.0001					Time		2.087	58	0.03598	F (58, 580) = 16.24		P<0.0001
	Genotype		0.111	1	0.111	F (1, 10) = 5.709		P=0.0380					Genotype		0.1232	1	0.1232	F (1, 10) = 1.160		P=0.3067					Genotype		0.7489	1	0.7489	F (1, 10) = 16.54		P=0.0023
	Subject		0.1944	10	0.01944	F (10, 580) = 9.985		P<0.0001					Subject		1.061	10	0.1061	F (10, 580) = 41.14		P<0.0001					Subject		0.4528	10	0.04528	F (10, 580) = 20.44		P<0.0001
	Residual		1.129	580	0.001946								Residual		1.496	580	0.002579								Residual		1.285	580	0.002215
